# Supplementary material for: FOXC2 Promotes Vasculogenic Mimicry in Ovarian Cancer
Source: MDPI journal article supplement (doi:10.3390/cancers14194851), 2022-10-04
Supplement: s1 [file s1]

Scratch assay – bright light  
C11-GFP C11-FOXC2

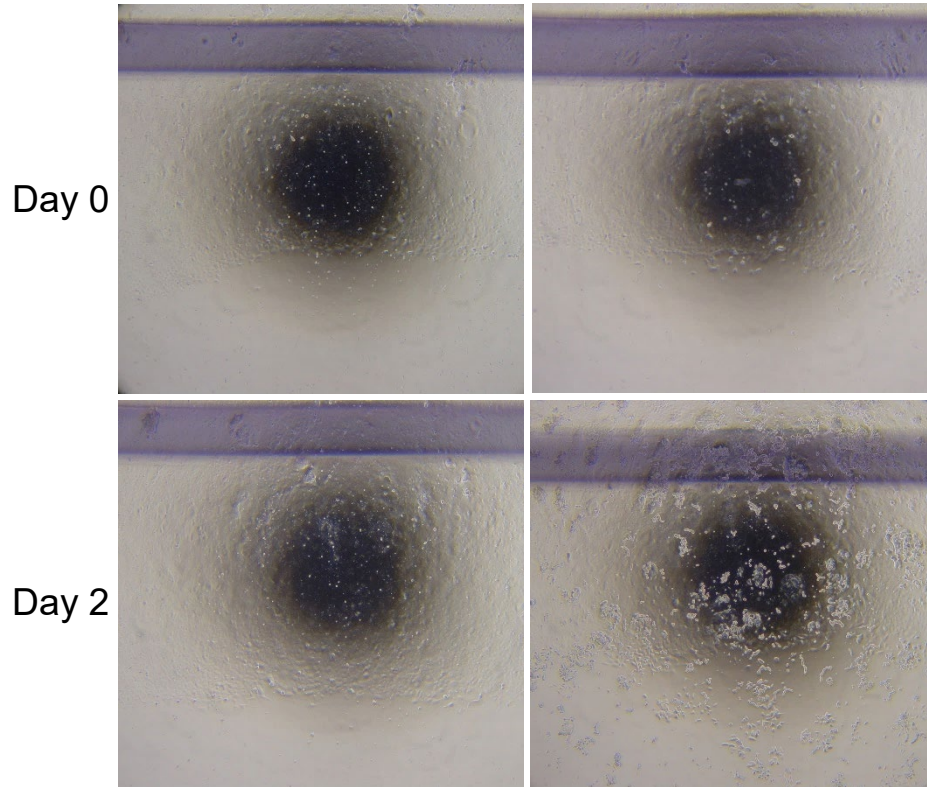

Scratch assay – filter applied

C11-GFP C11-FOXC2

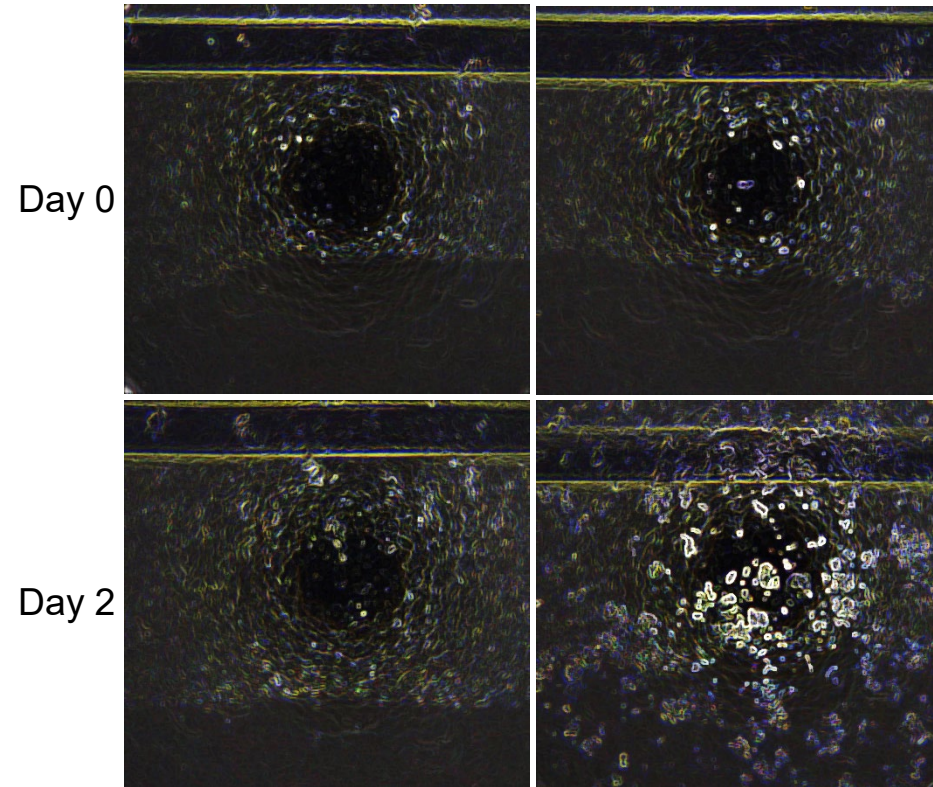

**Figure S1.** Wound-healing scratch assay.  $4 \times 10^6$  cells were plated in triplicate in a 6-well plate containing 10  $\mu\text{g/ml}$  mitomycin C to block proliferation. Upon reaching confluence, cells were scratched using a 200  $\mu\text{l}$  pipette and the medium was replaced. The images show the same area of the plate on Day 0 and Day 2 after scratching the plate. A dark filter was applied to the images on the right to visualize the wound border. On Day 2, C11-FOXC2 cells appeared to detach from the monolayer and float in the media.

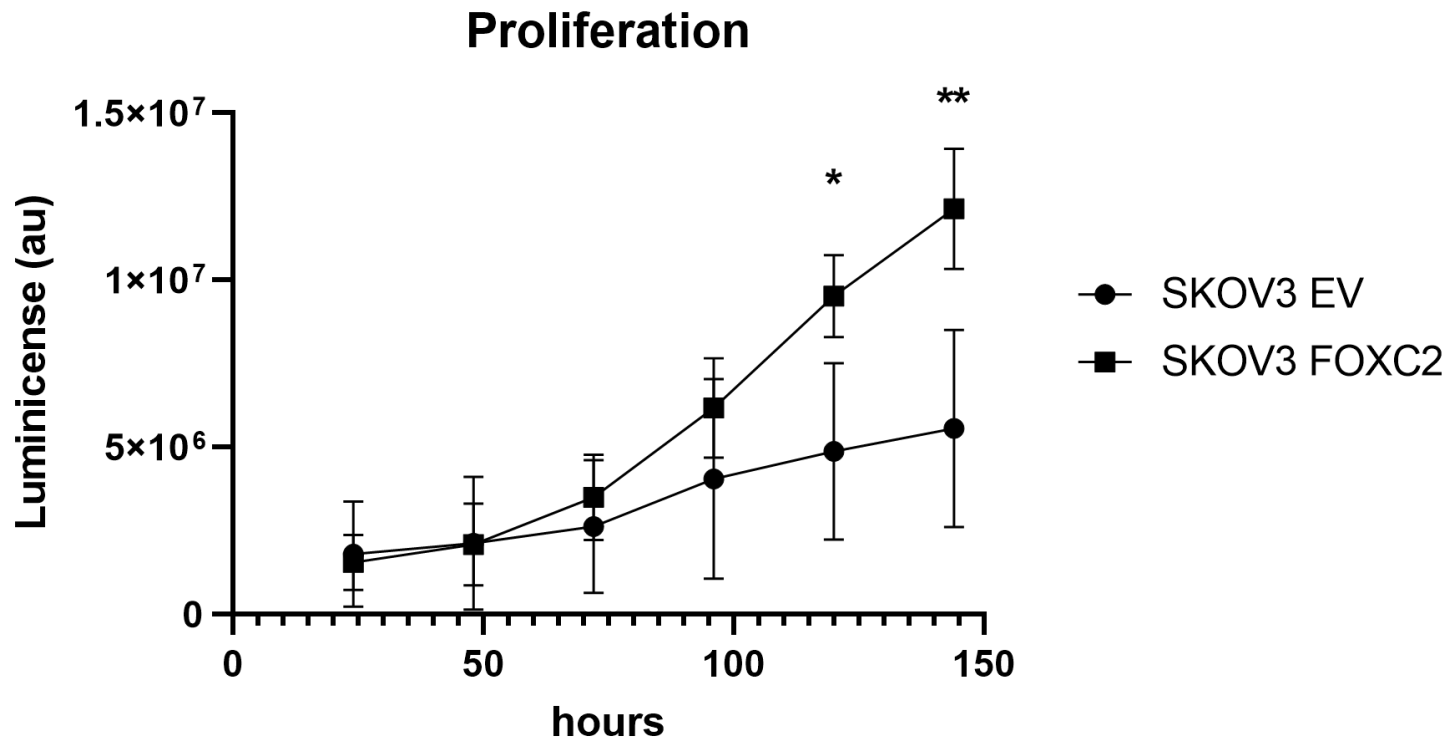

**Figure S2.** The proliferation of SKOV3 cells transduced with an empty vector (EV) or FOXC2 was measured by luminescence using the CellTiterGlo kit.

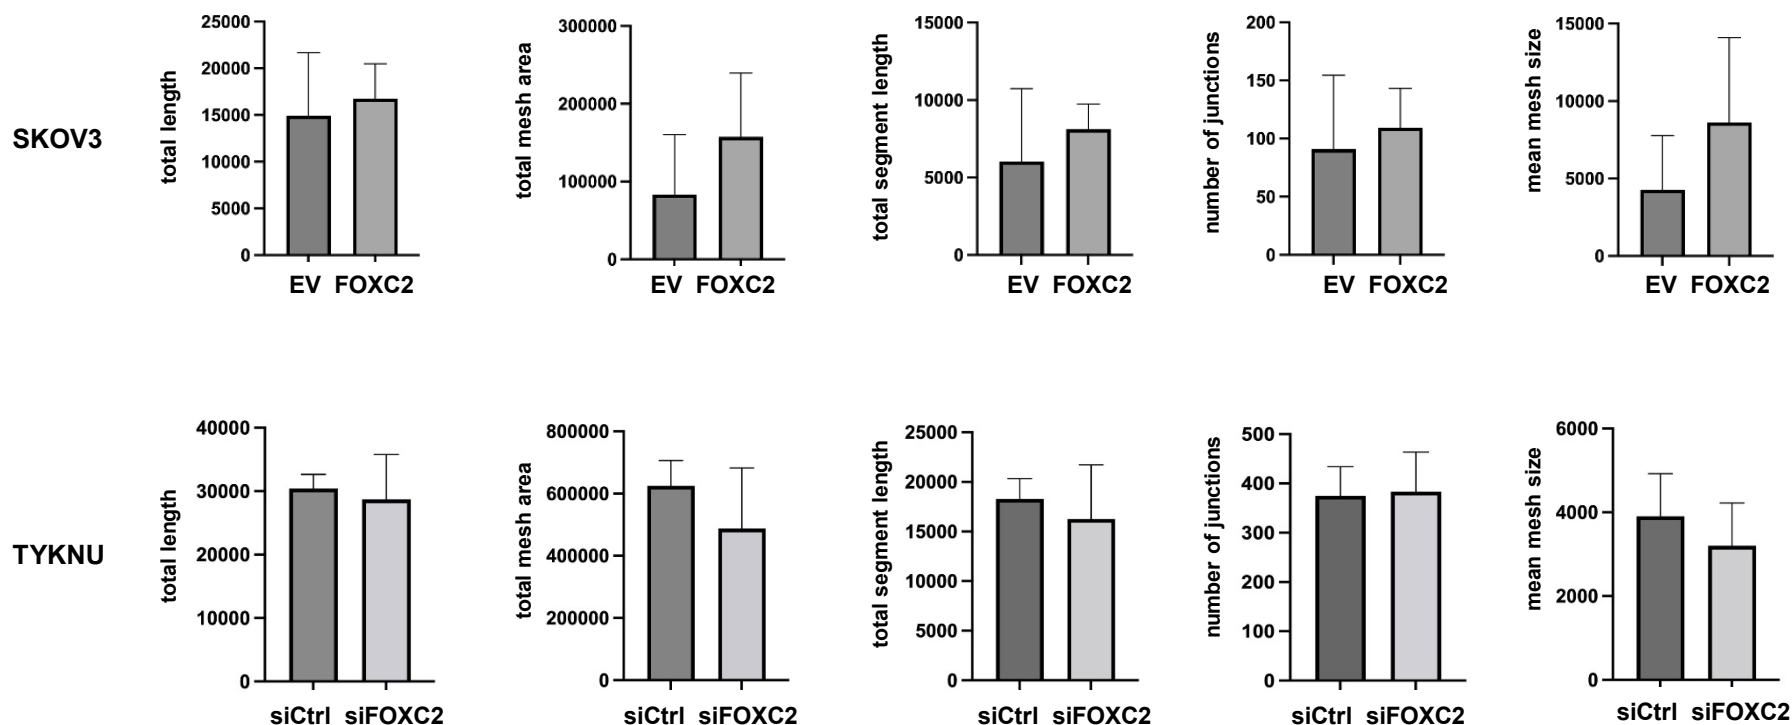

**Figure S3.** Comparative measurement of parameters obtained from the vascular mimicry assay image analyses of SKOV3 and TYKNU cell lines in which FOXC2 was overexpressed and silenced, respectively. Microphotographs were taken every 3 hours by the MuviCyte live cell imaging software and analyzed in Image J with an angiogenesis plugin. Error bars represent SEM of technical triplicates. EV, empty vector; siCtrl, short interfering RNA control.
