# Supplementary material for: FOXC2 Promotes Vasculogenic Mimicry in Ovarian Cancer
Source: MDPI journal article supplement (doi:10.3390/cancers14194851), 2022-10-04

Figure 1D Western Blots

FoXL2 mouse Ab 1:1500 2nd 1:1000

C<sub>1</sub> C<sub>1</sub> T<sub>1</sub> T<sub>1</sub> T<sub>2</sub> T<sub>2</sub>  
GFP FoXL2 GFP FoXL2 GFP FoXL2

100 —  
75 —  
50 —  
37 —  
25 —

63 kDa

$\alpha$ -tubulin

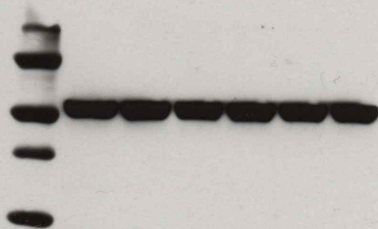

Supplement: s1 [file s1]
