# Supplementary material for: FOXC2 Promotes Vasculogenic Mimicry in Ovarian Cancer
Source: Cancers (Basel). 2022 Oct 4;14(19):4851. doi: 10.3390/cancers14194851 (PMC9564305; doi:10.3390/cancers14194851)
Supplement: Supplementary file 1 [file cancers-14-04851-s001.zip › Table S1.xlsx]

## Sheet: RNA-seq normalized read counts
Chromosome	Start	Stop	Strand	Gene Symbol	gene_biotype	gene_id	gene_name	gene_source	gene_version	C1_GFP_S17	C1_FOXC2_S18	C1_GFP_S18	C1_FOXC2_S19	C1_GFP_S19	C1_FOXC2_S20	C1_GFP_S20	C1_FOXC2_S21	C1_GFP_S21	C1_FOXC2_S22	C1_GFP_S22	C1_FOXC2_S23	C1_GFP_S23	C1_FOXC2_S24	C1_GFP_S24	C1_FOXC2_S25	C1_GFP_S25	C1_FOXC2_S26	C1_GFP_S26	C1_FOXC2_S27
3	108107280	108146147	-	ENSMUSG00000000001	protein_coding	ENSMUSG00000000001	Gnai3	ensembl_havana	4	313.554	261.774	256.305	240.158	230.682	206.568	231.175	224.582	215.747	194.626	253.541	251.689	251.619	232.873	222.598	213.214	242.981	209.925	243.942	207.717
X	77837901	77853624	-	ENSMUSG00000000003	protein_coding	ENSMUSG00000000003	Pbsn	ensembl_havana	15	0.0001	0.0001	0.0001	0.0001	0.0001	0.0001	0.0001	0.0001	0.0001	0.0001	0.0001	0.0001	0.0001	0.0001	0.0001	0.0001	0.0001	0.0001	0.0001	0.0311954
16	18780447	18811988	-	ENSMUSG00000000028	protein_coding	ENSMUSG00000000028	Cdc45	ensembl_havana	15	79.2839	72.3755	52.7836	58.3733	54.6753	55.1685	54.5064	57.998	47.4834	52.4973	56.0632	57.7181	60.4103	56.5867	52.5266	56.781	58.004	50.4018	54.1288	59.1125
7	142575529	142578144	-	ENSMUSG00000000031	lncRNA	ENSMUSG00000000031	H19	ensembl_havana	16	9.85738	65.3871	29.2506	10.5924	69.2217	188.736	20.2013	857.065	73.392	212.998	10.2315	475.015	75.3432	101.901	0.360769	0.442836	15.8873	187.414	24.9877	3.79374
X	161082525	161258214	+	ENSMUSG00000000037	protein_coding	ENSMUSG00000000037	Scml2	ensembl_havana	17	0.0001	0.291284	0.0001	0.396074	0.0001	0.0643614	0.0001	0.383346	0.379713	2.79665	0.0001	0.562718	0.0679767	0.259672	0.0001	0.0001	0.0312514	0.0001	0.0001	0.590913
11	108343354	108414397	+	ENSMUSG00000000049	protein_coding	ENSMUSG00000000049	Apoh	ensembl_havana	11	0.0355578	0.0648075	0.063276	0.0001	0.135101	0.0322307	0.0616891	0.0959114	0.0950034	0.0708987	0.149681	0.0662903	0.0001	0.0742633	0.0656761	0.0369947	0.187008	0.066114	0.0660302	0.0622908
11	121237253	121255857	+	ENSMUSG00000000056	protein_coding	ENSMUSG00000000056	Narf	ensembl_havana	7	24.9624	35.5892	19.5847	41.6764	46.6428	57.1606	34.0896	39.7299	35.0511	34.9393	33.0277	32.7312	48.7695	53.3235	33.8702	42.1338	24.8901	61.8552	24.3613	29.2609
6	17281185	17289116	+	ENSMUSG00000000058	protein_coding	ENSMUSG00000000058	Cav2	ensembl_havana	6	38.0464	33.0657	78.8437	65.6328	22.7139	55.6183	34.6439	47.7142	41.2198	53.9841	41.3444	63.6752	12.727	20.2838	68.1665	66.8532	20.3108	13.5	78.0945	114.369
13	5861482	5870395	+	ENSMUSG00000000078	protein_coding	ENSMUSG00000000078	Klf6	ensembl_havana	7	129.421	106.476	206.27	148.49	102.634	105.228	149.076	185.523	145.677	156.678	150.539	196.519	73.239	67.0067	126.234	106.736	98.5319	76.3783	195.846	139.712
4	120405281	120530187	+	ENSMUSG00000000085	protein_coding	ENSMUSG00000000085	Scmh1	ensembl_havana	16	13.4032	16.3711	24.7967	28.5432	20.7227	37.5287	28.2079	36.9194	27.5221	39.8952	22.6767	27.0719	19.345	15.6856	24.5584	33.2053	18.8155	22.2468	26.8667	43.2538
9	57521274	57532427	+	ENSMUSG00000000088	protein_coding	ENSMUSG00000000088	Cox5a	ensembl_havana	7	140.697	146.886	129.827	131.629	154.745	148.123	148.553	139.47	126.854	120.96	156.761	144.825	103.885	133.865	159.711	152.375	152.081	160.381	147.816	138.717
11	85832551	85841949	+	ENSMUSG00000000093	protein_coding	ENSMUSG00000000093	Tbx2	ensembl_havana	6	0.0355578	0.0648075	0.15804	0.297081	0.573853	0.996151	0.215662	0.89434	0.727693	0.814285	0.389012	0.529623	0.678867	0.407998	0.131252	0.47973	0.498522	0.264156	0.263821	1.52377
11	85886422	85916098	+	ENSMUSG00000000094	protein_coding	ENSMUSG00000000094	Tbx4	ensembl_havana	12	0.0001	0.0001	0.0001	0.0001	0.0001	0.0001	0.0616891	0.0320371	0.0001	0.177097	0.0001	0.0331952	0.0001	0.0001	0.0328881	0.0001	0.0001	0.0001	0.0001	0.0001
Y	2106015	2170410	-	ENSMUSG00000000103	protein_coding	ENSMUSG00000000103	Zfy2	ensembl_havana	12	0.0001	0.0001	0.0001	0.0001	0.0001	0.0001	0.0001	0.0001	0.0001	0.0001	0.0001	0.0001	0.0001	0.0001	0.0001	0.0001	0.0001	0.0001	0.0001	0.0001
11	95568818	95587736	-	ENSMUSG00000000120	protein_coding	ENSMUSG00000000120	Ngfr	ensembl_havana	6	0.248305	0.25893	0.031688	0.0990936	2.32886	0.289276	0.985525	0.22366	1.13894	0.424892	0.80784	0.0993855	0.0001	0.0742633	0.0656761	0.0738893	1.65112	1.68346	0.692367	0.342149
11	103774150	103817958	+	ENSMUSG00000000125	protein_coding	ENSMUSG00000000125	Wnt3	ensembl_havana	5	0.0001	0.0001	0.063276	0.0330979	0.0338501	0.0001	0.0001	0.0001	0.126638	0.0001	0.0599326	0.0001	0.0679767	0.0001	0.0984642	0.0369947	0.187008	0.0001	0.0660302	0.0311954
11	59306928	59333553	+	ENSMUSG00000000126	protein_coding	ENSMUSG00000000126	Wnt9a	ensembl_havana	11	0.319221	1.03542	8.71839	19.2049	50.8953	17.1258	21.4023	4.91842	33.7541	7.68176	13.2829	3.80604	1.96852	0.630488	11.5743	0.774888	71.2433	22.0488	9.46109	0.80858
17	63863062	64139497	+	ENSMUSG00000000127	protein_coding	ENSMUSG00000000127	Fer	ensembl_havana	15	34.7133	33.8745	34.8732	28.5762	29.2615	24.8692	36.5532	32.1927	38.2145	33.9481	31.4122	29.8519	22.8745	28.7755	31.5422	30.4751	31.1826	26.9668	35.1409	30.7845
7	126101715	126200502	-	ENSMUSG00000000131	protein_coding	ENSMUSG00000000131	Xpo6	ensembl_havana	15	196.047	158.695	154.497	157.631	111.781	136.363	131.092	144.771	131.251	126.836	138.483	156.011	139.351	148.661	166.072	166.764	109.31	94.9943	158.43	166.298
X	7762560	7775203	+	ENSMUSG00000000134	protein_coding	ENSMUSG00000000134	Tfe3	ensembl_havana	17	67.37	77.2933	62.1969	83.1877	52.0766	75.7	74.9232	77.0006	66.6855	58.586	55.076	63.9069	52.8082	61.0736	68.6911	84.5626	39.7181	62.4494	61.0515	87.969
11	108920349	108950784	+	ENSMUSG00000000142	protein_coding	ENSMUSG00000000142	Axin2	ensembl_havana	15	1.95028	1.16484	6.47564	5.37875	42.5253	2.89186	29.1625	5.04617	27.0159	7.18617	20.8218	5.36152	0.0340383	0.852978	2.29526	0.332152	58.0663	11.7176	30.1302	0.684199
5	140705011	140719380	+	ENSMUSG00000000148	protein_coding	ENSMUSG00000000148	Brat1	ensembl_havana	17	25.8843	34.7157	23.8174	27.3223	30.2065	31.5846	30.1479	30.2765	27.8701	31.5763	27.1641	29.5541	34.2099	36.6739	23.9682	29.4789	30.2481	32.743	24.5921	26.9287
5	140758408	140830432	-	ENSMUSG00000000149	protein_coding	ENSMUSG00000000149	Gna12	ensembl_havana	10	130.379	117.606	131.469	137.931	157.006	152.846	145.443	156.811	125.273	111.862	122.507	123.412	101.883	96.8574	122.365	125.663	123.858	125.757	152.859	140.427
7	143473736	143499335	+	ENSMUSG00000000154	protein_coding	ENSMUSG00000000154	Slc22a18	ensembl_havana	16	0.0001	0.0001	0.0001	0.0001	0.0338501	0.0001	0.0001	0.0001	0.0633689	0.141697	0.0001	0.0331952	0.0001	0.0001	0.0001	0.0001	0.0001	0.0001	0.0001	0.0001
16	96422288	96443620	-	ENSMUSG00000000157	protein_coding	ENSMUSG00000000157	Itgb2l	ensembl_havana	16	0.0001	0.0001	0.0001	0.0001	0.0001	0.0001	0.0001	0.0001	0.0001	0.0001	0.0001	0.0001	0.0001	0.0001	0.0001	0.0001	0.0001	0.0001	0.0001	0.0001
16	96361668	96422122	+	ENSMUSG00000000159	protein_coding	ENSMUSG00000000159	Igsf5	ensembl_havana	16	0.0001	0.0648075	0.0001	0.0001	0.0001	0.0001	0.0001	0.0001	0.0001	0.0001	0.0001	0.0001	0.0001	0.0001	0.0001	0.0001	0.0001	0.0001	0.0001	0.0001
9	50617321	50625001	+	ENSMUSG00000000167	protein_coding	ENSMUSG00000000167	Pih1d2	ensembl_havana	14	2.37578	1.52073	2.65349	2.07896	3.17261	1.83155	1.78618	2.01214	3.79623	3.07984	4.54738	2.747	3.08849	2.44749	2.88545	2.32446	2.52336	3.53185	3.39551	1.95911
9	50634633	50659781	-	ENSMUSG00000000168	protein_coding	ENSMUSG00000000168	Dlat	ensembl_havana	9	124.067	121.683	105.757	99.0597	66.6904	82.6081	76.8632	85.5597	85.8877	83.1886	113.024	130.594	100.152	113.989	105.053	103.342	58.1597	66.8063	96.4231	99.1633
9	50596357	50603813	-	ENSMUSG00000000171	protein_coding	ENSMUSG00000000171	Sdhd	ensembl_havana	5	217.499	198.07	198.246	209.767	190.925	195.708	196.685	187.918	146.12	140.394	208.935	208.831	175.36	203.69	221.647	213.805	220.209	220.454	203.296	193.382
6	127072902	127081409	+	ENSMUSG00000000182	protein_coding	ENSMUSG00000000182	Fgf23	ensembl_havana	9	0.0001	0.388345	0.0001	0.297081	0.0676003	0.192884	0.0308945	0.383346	0.0001	0.177097	0.0001	0.397242	0.0340383	0.148427	0.0328881	0.332152	0.0624028	0.429191	0.0001	0.279959
6	127015586	127028188	+	ENSMUSG00000000183	protein_coding	ENSMUSG00000000183	Fgf6	ensembl_havana	6	0.0001	0.0001	0.031688	0.0001	0.0001	0.0001	0.0001	0.0001	0.0001	0.0001	0.0001	0.0001	0.0001	0.0001	0.0984642	0.0001	0.0001	0.0001	0.0001	0.0001
6	127125162	127152194	-	ENSMUSG00000000184	protein_coding	ENSMUSG00000000184	Ccnd2	ensembl_havana	12	482.688	389.734	606.079	210.097	225.89	217.171	419.483	418.313	460.535	512.654	538.553	489.511	969.585	772.523	355.39	354.41	220.895	239.829	676.708	389.657
2	31152316	31218776	+	ENSMUSG00000000194	protein_coding	ENSMUSG00000000194	Gpr107	ensembl_havana	13	60.8458	69.5607	85.1297	85.9925	73.2717	73.7721	92.9688	102.391	96.327	107.26	72.577	80.9178	56.8129	56.5497	80.462	86.6287	66.7264	77.9626	77.8967	96.7379
14	123276634	123627145	-	ENSMUSG00000000197	protein_coding	ENSMUSG00000000197	Nalcn	ensembl_havana	8	0.0001	0.51776	0.505508	0.660057	0.0001	0.48206	0.0308945	2.07601	0.189907	1.16828	0.0599326	0.794384	0.0679767	0.370917	0.0328881	0.47973	0.0312514	0.099121	0.164926	0.497626
11	114791217	114795946	-	ENSMUSG00000000202	protein_coding	ENSMUSG00000000202	Btbd17	ensembl_havana	9	0.0001	0.0648075	0.0001	0.0001	0.0338501	0.0001	0.0308945	0.0001	0.0001	0.0001	0.0001	0.0001	0.271607	0.111345	0.0328881	0.0001	0.0001	0.0001	0.0001	0.0001
11	83175186	83190217	+	ENSMUSG00000000204	protein_coding	ENSMUSG00000000204	Slfn4	ensembl_havana	16	0.0001	0.226576	0.0001	0.0001	0.0001	0.0001	0.0001	0.191723	0.0001	0.0708987	0.0001	0.0662903	0.0001	0.370917	0.0001	0.0001	0.0001	0.0001	0.0001	0.0001
7	142892752	142931129	-	ENSMUSG00000000214	protein_coding	ENSMUSG00000000214	Th	ensembl_havana	11	0.0001	0.0001	0.0001	0.0001	0.0001	0.0001	0.0001	0.0001	0.0001	0.0001	0.0001	0.0001	0.0001	0.0001	0.0001	0.0001	0.0001	0.033107	0.0001	0.0001
7	142678656	142743382	-	ENSMUSG00000000215	protein_coding	ENSMUSG00000000215	Ins2	ensembl_havana	11	0.0710157	0.0001	0.0001	0.0001	0.236351	0.0322307	0.215662	0.0320371	0.126638	0.0001	0.0001	0.0001	0.0001	0.0001	0.0001	0.0001	0.21816	0.033107	0.0330651	0.0001
7	121734479	121768476	+	ENSMUSG00000000216	protein_coding	ENSMUSG00000000216	Scnn1g	ensembl_havana	8	0.0001	0.0001	0.0001	0.396074	0.0001	0.0001	0.0001	0.0001	0.0001	0.0001	0.0001	0.0993855	0.0001	0.0001	0.0001	0.0001	0.0001	0.0001	0.0001	0.311054
X	134404551	134456574	+	ENSMUSG00000000223	protein_coding	ENSMUSG00000000223	Drp2	ensembl_havana	13	1.24112	1.16484	1.80062	1.485	5.29887	1.92794	4.15736	2.29957	2.62576	2.33646	1.91474	2.25057	3.22424	2.59582	3.50842	3.20993	3.61366	3.66388	4.45039	2.51883
7	143005046	143019645	+	ENSMUSG00000000244	protein_coding	ENSMUSG00000000244	Tspan32	ensembl_havana	17	0.141931	0.388345	0.94774	1.94697	4.72512	2.95612	2.55605	0.89434	3.60643	1.84087	1.61558	0.761289	3.36	0.66757	1.70508	0.885572	5.26468	4.42304	1.15388	1.67925
2	38339281	38369734	+	ENSMUSG00000000247	protein_coding	ENSMUSG00000000247	Lhx2	ensembl_havana	11	0.177389	0.194223	0.505508	8.21657	1.0801	8.19342	0.615991	24.5598	1.55019	6.83218	0.748007	3.47509	0.101915	0.259672	2.29526	2.50894	0.872339	1.22136	0.857193	4.66441
6	128934381	128984708	+	ENSMUSG00000000248	protein_coding	ENSMUSG00000000248	Clec2g	ensembl_havana	16	0.0001	0.0001	0.063276	0.0330979	0.236351	0.0643614	0.277251	0.0001	1.8349	0.212496	0.23943	0.198671	0.0001	0.0001	0.393557	0.0001	0.498522	0.165135	0.0660302	0.0001
13	45507444	45553801	+	ENSMUSG00000000253	protein_coding	ENSMUSG00000000253	Gmpr	ensembl_havana	13	25.778	17.5358	32.5673	18.0169	71.0779	26.6043	60.5421	13.6053	50.1723	17.7706	46.131	17.7722	26.6078	12.7562	34.362	18.0416	59.2812	55.5839	64.4469	15.7966
11	55514238	55608199	-	ENSMUSG00000000263	protein_coding	ENSMUSG00000000263	Glra1	ensembl_havana	15	0.0001	0.0001	0.0001	0.0001	0.0001	0.0001	0.0001	0.0001	0.0317345	0.0001	0.0001	0.0001	0.0001	0.0001	0.0328881	0.0001	0.0001	0.0001	0.0001	0.0311954
X	140664599	140767716	+	ENSMUSG00000000266	protein_coding	ENSMUSG00000000266	Mid2	ensembl_havana	11	0.780173	6.17967	18.2264	28.1143	4.86012	29.3033	9.23846	32.9273	18.0317	16.8148	8.13733	19.427	0.950374	5.89609	31.5422	32.1353	2.243	9.37409	23.3724	60.5428
11	88999376	89020294	+	ENSMUSG00000000275	protein_coding	ENSMUSG00000000275	Trim25	ensembl_havana	16	150.164	140.739	82.35	99.0597	105.976	104.007	99.5896	100.347	124.608	130.057	145.244	158.989	195.858	178.215	106.594	106.921	111.491	125.889	93.8518	102.553
11	89035179	89066851	-	ENSMUSG00000000276	protein_coding	ENSMUSG00000000276	Dgke	ensembl_havana	11	34.536	28.3744	27.1658	22.0427	33.4127	32.9019	27.9923	26.6357	33.8806	34.9747	24.2024	25.3841	27.7277	32.632	27.5421	22.0631	50.9949	43.0082	28.9105	33.3966
11	88924020	88955466	-	ENSMUSG00000000278	protein_coding	ENSMUSG00000000278	Scpep1	ensembl_havana	10	213.634	229.032	125.562	111.005	142.291	110.658	152.402	154.033	165.005	157.173	159.723	149.954	165.721	195.828	151.284	142.045	129.652	177.908	176.067	163.127
11	74830920	74845726	+	ENSMUSG00000000282	protein_coding	ENSMUSG00000000282	Mnt	ensembl_havana	12	111.905	128.93	56.6058	85.7285	90.2142	99.4124	77.5715	71.7948	103.097	102.021	67.7306	63.0464	127.473	136.609	55.0185	74.7487	69.6234	120.212	56.1727	73.1987
10	77530252	77565709	+	ENSMUSG00000000290	protein_coding	ENSMUSG00000000290	Itgb2	ensembl_havana	13	1.70208	1.84426	3.82225	2.54093	1.14761	1.12467	0.708374	0.479157	3.51152	0.778886	4.30805	0.364147	2.10428	0.704652	3.67236	0.664204	0.778885	0.495205	0.560507	0.279959
10	31313383	31328205	+	ENSMUSG00000000295	protein_coding	ENSMUSG00000000295	Hddc2	ensembl_havana	13	30.0684	27.2743	25.6811	27.7183	20.9927	26.3473	19.0003	25.1346	32.4571	39.6828	28.6001	27.8	29.3568	34.4861	33.9358	36.1938	27.2576	20.3984	26.9656	28.6701
10	31332376	31445959	-	ENSMUSG00000000296	protein_coding	ENSMUSG00000000296	Tpd52l1	ensembl_havana	8	19.7147	15.3681	10.0135	10.9884	8.40389	7.93638	4.71166	9.58124	2.9421	5.2746	13.0436	10.3589	18.7001	15.0182	3.96746	7.41592	7.41413	8.87898	9.06551	7.21423
11	59970614	60046490	-	ENSMUSG00000000301	protein_coding	ENSMUSG00000000301	Pemt	ensembl_havana	16	6.59526	6.27673	5.24371	7.25963	7.56013	6.87607	8.19144	5.07811	6.39026	6.33659	9.15449	7.94294	13.3039	7.97266	7.1479	7.23145	11.2146	15.4474	7.18649	5.62837
8	106603351	106670247	+	ENSMUSG00000000303	protein_coding	ENSMUSG00000000303	Cdh1	ensembl_havana	12	6.16977	1.6825	8.11821	3.95984	12.0489	8.28982	4.03418	6.51528	11.0089	12.3545	5.29528	5.26223	7.02534	7.78725	10.5906	1.3652	36.3538	36.6379	24.1306	1.86582
2	179442431	179899374	+	ENSMUSG00000000305	protein_coding	ENSMUSG00000000305	Cdh4	ensembl_havana	12	0.0001	0.0648075	0.0001	0.0001	0.0001	0.0001	0.0001	0.0001	0.0633689	0.0001	0.0300163	0.0001	0.0001	0.0001	0.0001	0.0001	0.0312514	0.0001	0.0001	0.0001
2	121357714	121363738	+	ENSMUSG00000000308	protein_coding	ENSMUSG00000000308	Ckmt1	ensembl_havana	14	0.0001	0.0648075	0.0001	0.0330979	0.0338501	0.0322307	0.0616891	0.0320371	0.253176	0.0001	0.0300163	0.0001	0.0001	0.0742633	0.131252	0.0001	0.0312514	0.099121	0.0660302	0.0001
11	70224128	70229799	-	ENSMUSG00000000317	protein_coding	ENSMUSG00000000317	Bcl6b	ensembl_havana	11	0.248305	1.2619	0.126452	0.132091	0.371352	0.321407	0.462018	0.926277	0.759327	1.06208	0.329179	0.198671	0.101915	0.185508	0.0328881	0.0001	0.591976	0.792268	0.362716	0.342149
11	70156197	70170835	+	ENSMUSG00000000318	protein_coding	ENSMUSG00000000318	Clec10a	ensembl_havana	16	0.0001	0.0001	0.031688	0.0001	0.0001	0.0001	0.0001	0.0001	0.0001	0.0001	0.0001	0.0001	0.0001	0.0001	0.0328881	0.0001	0.0001	0.033107	0.0001	0.0001
11	70241457	70255354	-	ENSMUSG00000000320	protein_coding	ENSMUSG00000000320	Alox12	ensembl_havana	10	0.0001	0.808944	0.347568	0.165089	0.303851	0.546322	1.20109	0.926277	2.08797	3.82323	0.119765	0.430337	0.0679767	0.778815	0.295193	0.516625	0.124706	0.627233	0.0660302	0.311054
16	18348182	18407077	+	ENSMUSG00000000325	protein_coding	ENSMUSG00000000325	Arvcf	ensembl_havana	16	6.9853	10.321	20.8798	25.9694	149.21	35.2796	79.2652	15.7771	61.2128	17.275	35.8099	10.1934	16.1887	10.6425	26.7552	18.1892	111.086	61.4261	36.2288	14.8637
16	18406886	18426853	-	ENSMUSG00000000326	protein_coding	ENSMUSG00000000326	Comt	ensembl_havana	13	99.353	112.397	98.3019	110.939	144.282	101.983	155.636	118.519	127.424	115.685	100.13	96.3401	81.4182	91.9256	136.464	125.774	118.407	101.893	114.653	104.636
3	116488963	116508209	-	ENSMUSG00000000339	protein_coding	ENSMUSG00000000339	Rtca	ensembl_havana	14	81.9432	62.9929	63.3972	58.0103	57.0716	55.0721	48.4399	60.2336	52.3551	53.6301	65.2475	63.1126	47.1744	53.2865	57.3464	57.4082	65.8853	56.5411	58.9417	65.9223
3	116513070	116549982	+	ENSMUSG00000000340	protein_coding	ENSMUSG00000000340	Dbt	ensembl_havana	10	70.9513	63.8664	48.5508	52.4337	53.0216	58.6386	54.1369	62.7566	45.3955	48.9928	65.1877	61.4909	79.6873	78.5762	56.789	57.5189	64.9196	54.3956	42.2284	64.0255
15	100615349	100620762	+	ENSMUSG00000000346	protein_coding	ENSMUSG00000000346	Dazap2	ensembl_havana	9	158.993	158.695	135.197	166.705	146.509	166.951	136.851	143.015	185.505	189.103	145.423	145.023	165.755	152.74	173.187	184.141	149.714	189.229	138.816	139.152
X	38600578	38613427	+	ENSMUSG00000000355	protein_coding	ENSMUSG00000000355	Mcts1	ensembl_havana	13	28.5082	29.4097	29.0295	23.3626	18.3939	24.9978	29.7784	22.2922	23.5994	19.3635	29.2283	24.6229	31.3931	32.0016	31.9029	25.937	18.8778	20.4644	24.8888	24.3789
2	152626951	152635199	+	ENSMUSG00000000359	protein_coding	ENSMUSG00000000359	Rem1	ensembl_havana	3	2.65944	1.87662	0.347568	0.231085	0.135101	0.0643614	0.831552	0.574969	1.67673	2.58425	1.76516	0.860574	4.00482	1.74294	2.13132	1.18073	0.0001	0.198142	1.48353	1.18173
14	56402581	56525033	+	ENSMUSG00000000365	protein_coding	ENSMUSG00000000365	Rnf17	ensembl_havana	9	0.0355578	0.0001	0.0001	0.0001	0.0001	0.0001	0.923936	0.862403	0.0001	0.0354994	0.0300163	0.198671	0.0001	0.0001	0.0001	0.0001	0.0001	0.0001	0.0001	0.0001
10	78186725	78244642	-	ENSMUSG00000000374	protein_coding	ENSMUSG00000000374	Trappc10	ensembl_havana	8	70.9158	72.602	66.1138	88.8303	56.9366	83.3471	78.8649	107.117	79.371	84.4276	75.5986	84.2935	59.9352	71.679	72.8224	86.4812	58.6893	52.6793	79.3801	105.04
11	6546887	6596745	+	ENSMUSG00000000378	protein_coding	ENSMUSG00000000378	Ccm2	ensembl_havana	15	47.4072	49.0484	60.7754	57.9443	68.6479	51.4413	61.0041	51.9299	57.5432	65.2057	61.6277	67.6797	39.8437	46.2039	59.7727	54.8256	73.4862	61.8882	63.8206	66.9174
11	6635482	6638638	-	ENSMUSG00000000381	protein_coding	ENSMUSG00000000381	Wap	ensembl_havana	10	0.0001	0.0001	0.0001	0.0001	0.0001	0.0001	0.0001	0.0001	0.0001	0.0001	0.0001	0.0001	0.0001	0.0001	0.0001	0.0001	0.0001	0.0001	0.0001	0.0001
11	6615598	6626068	-	ENSMUSG00000000384	protein_coding	ENSMUSG00000000384	Tbrg4	ensembl_havana	15	165.446	155.654	119.055	110.345	133.279	111.622	118.343	110.407	119.262	137.951	141.355	148.995	140.81	154.519	148.76	131.05	158.062	144.208	113.565	123.698
16	97564682	97611196	-	ENSMUSG00000000385	protein_coding	ENSMUSG00000000385	Tmprss2	ensembl_havana	8	0.0001	0.0001	0.0001	0.0001	0.0001	0.0001	0.0001	0.0001	0.0001	0.0001	0.0001	0.0001	0.0001	0.0001	0.0001	0.0001	0.0001	0.0001	0.0660302	0.0001
16	97447035	97462908	-	ENSMUSG00000000386	polymorphic_pseudogene	ENSMUSG00000000386	Mx1	ensembl_havana	16	0.0710157	0.0324538	0.0001	0.0660957	0.0001	0.0643614	0.0308945	0.0320371	0.0001	0.141697	0.149681	0.0662903	0.0001	0.0371817	0.0001	0.0001	0.0001	0.0001	0.263821	0.0001
2	62500943	62574076	-	ENSMUSG00000000392	protein_coding	ENSMUSG00000000392	Fap	ensembl_havana	17	0.0001	0.0324538	0.031688	0.0001	0.0001	0.0001	0.123278	0.0959114	0.0633689	0.0708987	0.0599326	0.0001	0.577052	0.0001	0.0328881	0.0738893	0.0001	0.0001	0.0660302	0.0311954
2	62474530	62483651	-	ENSMUSG00000000394	protein_coding	ENSMUSG00000000394	Gcg	ensembl_havana	15	0.0001	0.0001	0.0001	0.0990936	0.0001	0.0643614	0.0001	0.0320371	0.0001	0.0354994	0.0300163	0.0331952	0.0001	0.0001	0.0001	0.0001	0.0001	0.0001	0.0989953	0.0001
6	126821721	126849137	-	ENSMUSG00000000399	protein_coding	ENSMUSG00000000399	Ndufa9	ensembl_havana	10	132.4	139.024	116.212	114.932	123.053	136.17	113.201	127.621	117.142	138.836	153.261	154.554	171.219	166.274	130.857	120.129	130.68	132.589	131.498	132.933
X	166523007	166585721	-	ENSMUSG00000000402	protein_coding	ENSMUSG00000000402	Egfl6	ensembl_havana	2	0.0001	0.0324538	0.0001	0.0330979	0.168851	0.0643614	0.585196	0.0001	0.506251	0.0708987	0.269347	0.0001	0.20373	0.0742633	0.0656761	0.0001	0.342765	0.066114	0.0001	0.0001
4	129548344	129573642	-	ENSMUSG00000000409	protein_coding	ENSMUSG00000000409	Lck	ensembl_havana	14	1.27658	1.65014	1.16886	1.02303	1.28261	0.93189	1.53983	1.46921	3.82787	5.02681	1.31642	1.12534	1.12007	0.927142	0.623073	0.664204	2.46106	2.11255	1.18684	1.02625
4	129489014	129491023	-	ENSMUSG00000000411	protein_coding	ENSMUSG00000000411	Tssk3	ensembl_havana	7	0.0001	0.0001	0.0001	0.0001	0.0338501	0.0001	0.0001	0.0001	0.0001	0.0001	0.0001	0.0001	0.0001	0.0001	0.0001	0.0001	0.0001	0.0001	0.0001	0.0001
6	18366478	18514844	-	ENSMUSG00000000416	protein_coding	ENSMUSG00000000416	Cttnbp2	ensembl_havana	16	0.0001	0.420699	0.15804	3.72886	2.46386	2.73121	0.0308945	3.83256	3.8595	7.50476	0.478761	2.68081	1.18794	4.15325	0.0328881	0.0738893	1.86918	1.02332	0.956088	0.528722
18	24205344	24286819	+	ENSMUSG00000000420	protein_coding	ENSMUSG00000000420	Galnt1	ensembl_havana	15	103.537	128.283	116.465	181.125	136.114	222.859	140.115	202.769	133.023	152.394	117.87	161.504	71.033	85.9183	122.332	139.72	137.97	135.626	146.003	173.419
10	107482908	107486135	-	ENSMUSG00000000435	protein_coding	ENSMUSG00000000435	Myf5	ensembl_havana	1	0.0001	0.0001	0.0001	0.0001	0.0001	0.0001	0.0001	0.159786	0.0001	0.0001	0.0001	0.0001	0.0340383	0.0001	0.0001	0.0001	0.0001	0.0001	0.0001	0.0001
6	115601902	115622625	+	ENSMUSG00000000439	protein_coding	ENSMUSG00000000439	Mkrn2	ensembl_havana	9	43.6842	44.3248	29.7244	29.8962	32.6702	36.4042	32.7963	32.0011	47.2303	49.4884	40.9555	39.8798	50.1949	40.6045	28.3946	26.1215	34.142	40.3347	31.7785	30.287
6	115360951	115490400	+	ENSMUSG00000000440	protein_coding	ENSMUSG00000000440	Pparg	ensembl_havana	12	14.396	23.5536	8.40251	3.26689	2.36261	8.9003	3.04876	15.2661	10.9456	17.4166	8.22708	23.5308	8.17924	10.1976	4.09861	5.82945	1.43306	5.28122	8.14248	8.05381
6	115618067	115676636	-	ENSMUSG00000000441	protein_coding	ENSMUSG00000000441	Raf1	ensembl_havana	17	170.942	175.26	141.641	168.751	150.593	210.777	148.399	182.84	189.143	204.007	173.724	195.427	169.726	181.812	158.563	180.23	151.77	159.358	149.892	189.838
7	127214447	127233131	-	ENSMUSG00000000486	protein_coding	ENSMUSG00000000486	2022-09-01	ensembl_havana	13	1.87937	3.04135	2.24285	3.92684	2.02511	2.44203	2.15572	3.19381	2.56249	3.25684	2.45324	2.58152	0.746743	1.48337	2.81987	4.39056	1.58882	3.66388	2.96696	3.07854
15	79995874	80014978	-	ENSMUSG00000000489	protein_coding	ENSMUSG00000000489	Pdgfb	ensembl_havana	7	17.339	7.02087	53.5733	31.3811	125.686	18.6038	30.3327	5.8446	66.1794	9.80572	34.3141	13.0727	0.61099	0.927142	36.6899	4.35367	171.831	30.9607	50.2389	1.99021
15	101128522	101145337	+	ENSMUSG00000000530	protein_coding	ENSMUSG00000000530	Acvrl1	ensembl_havana	16	0.0001	0.0001	0.0001	0.0001	0.0676003	0.0643614	0.0001	0.159786	0.379713	0.106298	0.149681	0.198671	0.0340383	0.0001	0.0328881	0.0738893	0.0312514	0.033107	0.0660302	0.0933862
15	101224188	101232757	+	ENSMUSG00000000531	protein_coding	ENSMUSG00000000531	Grasp	ensembl_havana	5	13.4386	19.2829	5.90705	5.60974	2.43011	3.95217	3.63385	7.12208	5.63103	10.3013	5.5047	8.30698	12.9306	14.9811	2.98381	6.05082	1.71343	2.8387	2.7362	6.7478
15	101174067	101213685	+	ENSMUSG00000000532	protein_coding	ENSMUSG00000000532	Acvr1b	ensembl_havana	11	9.78647	11.1945	14.7517	8.84353	15.8289	17.1258	9.14608	10.731	14.9316	21.0981	10.052	11.8482	18.8019	8.75137	6.65608	12.8394	13.3952	27.957	10.2193	15.0503
11	60226714	60352906	-	ENSMUSG00000000538	protein_coding	ENSMUSG00000000538	Tom1l2	ensembl_havana	18	83.8579	89.4583	67.1878	83.4847	62.7754	83.0579	76.4013	85.6236	63.965	72.144	75.7482	86.1799	77.4813	87.1049	100.692	94.3766	51.3687	75.5861	91.9068	107.87
1	166130238	166166511	+	ENSMUSG00000000544	protein_coding	ENSMUSG00000000544	Gpa33	ensembl_havana	14	0.212847	0.614822	0.126452	0.264083	0.0676003	0.128623	0.123278	0.191723	0.221541	0.389493	0.0599326	0.364147	0.0340383	0.0742633	0.0656761	0.184573	0.0624028	0.198142	0.0330651	0.311054
15	103313895	103340094	-	ENSMUSG00000000552	protein_coding	ENSMUSG00000000552	Zfp385a	ensembl_havana	10	18.58	41.3806	11.1507	19.3368	23.254	35.4081	25.6519	33.7896	26.8578	33.9127	14.1804	14.0655	28.8477	26.6247	11.9022	19.9232	20.8715	41.952	12.1313	22.2022
15	103344286	103366764	-	ENSMUSG00000000555	protein_coding	ENSMUSG00000000555	Itga5	ensembl_havana	8	243.56	161.542	234.478	116.879	168.582	122.418	174.513	133.37	237.1	184.856	141.265	126.589	87.1538	75.1646	223.91	258.89	128.562	107.273	240.382	248.701
5	70957597	71095850	-	ENSMUSG00000000560	protein_coding	ENSMUSG00000000560	Gabra2	ensembl_havana	9	0.0001	0.0001	0.031688	0.0001	0.0001	0.0001	0.0001	0.0320371	0.727693	0.460292	0.0001	0.0001	0.0001	0.0001	0.0001	0.0001	0.0001	0.0001	0.0001	0.0001
3	105959369	105970038	+	ENSMUSG00000000561	protein_coding	ENSMUSG00000000561	Wdr77	ensembl_havana	14	186.402	154.489	98.8073	83.5507	114.244	85.6284	93.985	74.7969	83.0722	69.489	113.353	101.735	107.72	122.592	93.1838	94.8931	138.655	115.558	96.1593	96.1782
3	105870858	105908927	+	ENSMUSG00000000562	protein_coding	ENSMUSG00000000562	Adora3	ensembl_havana	5	0.0001	0.0001	0.0001	0.0001	0.0001	0.0001	0.0001	0.0001	0.0001	0.0001	0.0001	0.0001	0.0679767	0.0001	0.0001	0.0001	0.0312514	0.0001	0.0001	0.0001
3	105942698	105960100	-	ENSMUSG00000000563	protein_coding	ENSMUSG00000000563	Atp5f1	ensembl_havana	17	377.874	338.971	225.759	216.367	265.479	235.614	240.69	242.02	219.575	205.387	268.08	240.337	312.301	304.626	265.092	237.823	283.042	267.456	244.832	239.03
11	112782224	112787761	+	ENSMUSG00000000567	protein_coding	ENSMUSG00000000567	Sox9	ensembl_havana	5	41.9467	35.1686	41.7594	8.18357	16.6052	3.18104	16.5984	11.3059	20.1829	12.7793	18.967	9.43222	9.4689	21.5075	10.9185	5.90324	10.7785	11.2885	48.327	4.7266
5	99955935	99978939	-	ENSMUSG00000000568	protein_coding	ENSMUSG00000000568	Hnrnpd	ensembl_havana	15	397.199	347.156	367.084	361.657	289.104	267.327	285.681	268.975	289.519	282.204	283.636	267.475	242.082	274.553	260.829	308.07	338.896	294.951	284.39	250.131
17	6601671	6609775	+	ENSMUSG00000000579	protein_coding	ENSMUSG00000000579	Dynlt1c	ensembl_havana	14	0.106474	0.25893	0.0001	0.132091	0.0338501	0.160753	0.0924836	0.319471	0.379713	0.283295	0.179598	0.397242	0.271607	0.370917	0.131252	0.184573	0.0935542	0.066114	0.0330651	0.248863
11	17257579	17269177	+	ENSMUSG00000000581	protein_coding	ENSMUSG00000000581	C1d	ensembl_havana	8	46.8045	42.7071	54.2999	51.5427	48.4991	50.4774	46.1611	49.4069	46.0282	54.6567	60.4609	54.21	40.8619	48.7254	50.8872	51.6895	58.0974	55.2208	51.2938	55.6298
11	55098115	55113030	+	ENSMUSG00000000594	protein_coding	ENSMUSG00000000594	Gm2a	ensembl_havana	7	21.4876	21.2889	64.566	56.3604	157.917	96.9705	91.4291	40.7838	113.473	63.5419	64.7689	48.4514	32.2755	23.0649	74.1667	34.4966	146.443	177.182	92.1376	50.4368
5	3803184	3845565	+	ENSMUSG00000000600	protein_coding	ENSMUSG00000000600	Krit1	ensembl_havana	15	46.7335	47.2366	63.7447	63.752	61.5941	66.4142	66.3931	73.9665	69.7224	86.2329	63.0636	69.7978	31.6306	33.6703	66.0681	63.7541	64.0474	66.0141	69.6883	80.2884
7	7282309	7300852	-	ENSMUSG00000000605	protein_coding	ENSMUSG00000000605	Clcn4	ensembl_havana	9	38.6492	47.4954	44.4128	63.257	45.5965	62.0766	52.7511	62.8524	44.6047	43.4351	40.6264	41.005	34.7869	39.6404	54.1004	61.3559	45.8238	49.6096	42.0636	58.0241
14	51410820	51420722	+	ENSMUSG00000000606	protein_coding	ENSMUSG00000000606	Vmn2r88	ensembl_havana	18	0.0001	0.0001	0.0001	0.0001	0.0001	0.0001	0.0001	0.0001	0.0001	0.0001	0.0001	0.0001	0.0001	0.0001	0.0001	0.0001	0.0001	0.0001	0.0001	0.0001
11	50850685	50866209	+	ENSMUSG00000000617	protein_coding	ENSMUSG00000000617	Grm6	ensembl_havana	14	0.0001	0.0001	0.0001	0.0001	0.0001	0.0001	0.0001	0.0001	0.0001	0.0001	0.0001	0.0001	0.0001	0.0001	0.0001	0.0001	0.0001	0.0001	0.0001	0.0001
6	82911885	82939770	-	ENSMUSG00000000627	protein_coding	ENSMUSG00000000627	Sema4f	ensembl_havana	15	0.0355578	1.65014	1.01092	0.0990936	0.438852	0.0322307	0.123278	0.191723	0.759327	0.849685	0.538593	0.728193	0.271607	2.15084	1.57393	0.258363	0.21816	0.198142	0.890158	0.839676
6	82725025	82774455	-	ENSMUSG00000000628	protein_coding	ENSMUSG00000000628	Hk2	ensembl_havana	10	179.665	140.415	136.523	89.5893	115.898	102.047	90.382	63.2995	107.652	85.0648	144.047	129.303	171.524	140.503	179.58	142.266	109.84	82.2536	128.366	126.963
11	77763246	77865981	+	ENSMUSG00000000631	protein_coding	ENSMUSG00000000631	Myo18a	ensembl_havana	20	157.362	168.272	94.5745	123.577	149.615	156.123	155.728	142.536	106.418	139.013	167.172	107.758	305.581	218.819	129.349	104.191	157.065	138.795	97.5109	76.1527
11	77930800	77979049	+	ENSMUSG00000000632	protein_coding	ENSMUSG00000000632	Sez6	ensembl_havana	13	0.0001	0.0001	0.0001	0.0330979	0.0001	0.0001	0.0001	0.0001	0.0001	0.0354994	0.0599326	0.0662903	0.0340383	0.0371817	0.0001	0.0369947	0.0001	0.0001	0.0001	0.0001
17	83831156	83847964	-	ENSMUSG00000000673	protein_coding	ENSMUSG00000000673	Haao	ensembl_havana	9	0.0001	0.0648075	0.031688	0.0001	0.607603	0.257145	0.154073	0.0001	0.28481	0.177097	0.119765	0.0993855	0.169792	0.0742633	0.0984642	0.0738893	0.373917	0.33017	0.0660302	0.0311954
4	134082448	134095083	-	ENSMUSG00000000682	protein_coding	ENSMUSG00000000682	Cd52	ensembl_havana	7	0.0001	0.0001	0.0001	0.0001	0.0338501	0.0001	0.0308945	0.0001	0.0633689	0.0001	0.0599326	0.0001	0.0001	0.0001	0.0001	0.0001	0.0001	0.0001	0.0001	0.0001
11	77515121	77538608	+	ENSMUSG00000000686	protein_coding	ENSMUSG00000000686	Abhd15	ensembl_havana	11	0.531968	0.388345	0.284392	1.12203	0.708853	1.34959	0.523607	0.990152	0.727693	1.09748	0.897589	0.926764	2.24003	0.630488	1.08211	0.848677	0.373917	0.627233	0.593472	0.373245
11	96292476	96301570	+	ENSMUSG00000000690	protein_coding	ENSMUSG00000000690	Hoxb6	ensembl_havana	5	0.0001	0.0648075	6.00182	3.0029	3.20636	0.867628	8.49939	9.10219	10.6609	12.2129	13.6419	18.401	0.135853	0.0001	6.75444	10.2937	1.46422	2.07954	14.7685	19.2482
6	83034173	83052563	+	ENSMUSG00000000693	protein_coding	ENSMUSG00000000693	Loxl3	ensembl_havana	10	13.2259	9.4474	13.2986	8.18357	14.4789	11.5993	17.0295	16.0325	19.5186	14.8678	16.6036	10.5244	25.6235	9.41884	6.26262	5.27604	13.364	12.8068	15.4607	16.9471
12	105176344	105181146	+	ENSMUSG00000000701	protein_coding	ENSMUSG00000000701	Tcl1b5	ensembl_havana	8	0.0001	0.0001	0.0001	0.0001	0.0001	0.0001	0.0001	0.0001	0.0001	0.0001	0.0001	0.0001	0.0001	0.0001	0.0001	0.0001	0.0001	0.0001	0.0001	0.0001
13	23456992	23465902	-	ENSMUSG00000000706	protein_coding	ENSMUSG00000000706	Btn1a1	ensembl_havana	16	0.0355578	0.194223	2.17967	5.44475	0.202601	0.514191	0.0924836	0.574969	0.56952	0.814285	0.389012	0.297956	0.339483	0.148427	0.950954	0.147679	0.436219	0.066114	0.197891	0.155577
17	53566861	53672721	+	ENSMUSG00000000708	protein_coding	ENSMUSG00000000708	Kat2b	ensembl_havana	14	44.9961	43.2247	47.4453	66.2268	70.5042	74.3505	69.9961	55.0278	64.1864	53.9133	65.7561	59.439	41.6085	41.7911	68.9534	63.7172	66.4149	44.6256	70.7762	88.0623
10	128677175	128696265	-	ENSMUSG00000000711	protein_coding	ENSMUSG00000000711	Rab5b	ensembl_havana	3	32.9759	36.9158	25.9654	38.6736	30.1052	39.1031	35.3214	41.199	38.9738	35.1871	39.0109	35.3788	61.0552	49.9862	28.9192	35.3452	25.077	34.0963	33.163	44.4976
11	77718615	77725284	-	ENSMUSG00000000724	protein_coding	ENSMUSG00000000724	Cryba1	ensembl_havana	10	0.0001	0.0324538	0.0001	0.0330979	0.0001	0.0001	0.0001	0.0001	0.0001	0.0001	0.0300163	0.0001	0.0001	0.0371817	0.0001	0.0738893	0.0001	0.0001	0.0001	0.0622908
10	78041947	78063623	+	ENSMUSG00000000730	protein_coding	ENSMUSG00000000730	Dnmt3l	ensembl_havana	13	0.0001	0.0648075	0.0001	0.0001	0.0001	0.0001	0.0001	0.0001	0.0001	0.0001	0.0001	0.0001	0.101915	0.0001	0.0001	0.0738893	0.0001	0.0001	0.0001	0.0001
10	78030022	78043611	-	ENSMUSG00000000731	protein_coding	ENSMUSG00000000731	Aire	ensembl_havana	15	0.0001	0.0324538	0.0001	0.0001	0.0001	0.0001	0.0001	0.0001	0.0001	0.0001	0.0599326	0.0001	0.543113	0.22259	0.131252	0.0001	0.0001	0.0001	0.0001	0.0001
10	78069302	78083914	+	ENSMUSG00000000732	protein_coding	ENSMUSG00000000732	Icosl	ensembl_havana	9	0.319221	0.420699	0.47392	1.02303	0.810104	0.417799	0.554402	0.574969	1.36038	0.849685	0.538593	0.198671	3.6315	1.00131	0.491921	0.774888	0.872339	0.99031	0.329751	0.559817
8	123062942	123097761	+	ENSMUSG00000000738	protein_coding	ENSMUSG00000000738	Spg7	ensembl_havana	18	74.107	86.417	64.7871	86.9824	88.6955	97.6131	78.2182	73.0084	77.1882	75.8255	74.372	69.6323	111.046	97.117	101.381	90.2813	84.14	75.124	73.1497	76.4637
8	123140192	123158316	-	ENSMUSG00000000739	protein_coding	ENSMUSG00000000739	Sult5a1	ensembl_havana	14	0.0710157	0.550114	0.0001	0.132091	0.0676003	0.353538	0.0308945	0.0001	0.0317345	0.318694	0.0001	0.165576	0.169792	1.03839	0.0001	0.147679	0.0935542	0.198142	0.0330651	0.0622908
8	123102350	123105245	+	ENSMUSG00000000740	protein_coding	ENSMUSG00000000740	Rpl13	ensembl_havana	12	233.667	281.025	207.123	226.2	217.857	223.437	172.511	206.027	197.937	239.725	201.756	219.256	253.961	326.059	271.78	241.439	261.142	262.769	187.539	187.163
8	123204264	123212764	-	ENSMUSG00000000743	protein_coding	ENSMUSG00000000743	Chmp1a	ensembl_havana	9	67.6537	75.902	65.2925	80.1849	83.1942	84.054	66.1775	74.4456	85.7295	98.5519	76.4362	79.9911	78.3637	88.9961	101.741	89.1376	88.0339	92.6178	71.6003	72.6079
11	75298166	75348325	-	ENSMUSG00000000751	protein_coding	ENSMUSG00000000751	Rpa1	ensembl_havana	13	393.263	743.199	228.887	251.84	262.914	278.927	232.53	318.126	422.795	497.609	439.62	322.281	641.842	355.28	248.37	244.169	300.081	389.978	222.02	284.678
11	75409769	75422702	-	ENSMUSG00000000753	protein_coding	ENSMUSG00000000753	Serpinf1	ensembl_havana	15	1.84391	29.2803	12.6669	0.891042	45.9341	1.5745	36.1529	5.65298	111.417	19.045	2.90198	0.893669	79.4837	2.52165	0.229616	0.516625	82.5201	12.5098	12.1642	1.52377
8	12614277	12672249	-	ENSMUSG00000000759	protein_coding	ENSMUSG00000000759	Tubgcp3	ensembl_havana	14	65.4553	64.9018	58.5326	68.7346	62.6066	69.8201	54.4448	63.8105	75.0054	90.0915	62.0465	65.6278	52.0955	62.5198	77.4783	74.1952	72.6763	71.3282	57.5902	61.5379
10	6758506	7038199	+	ENSMUSG00000000766	protein_coding	ENSMUSG00000000766	Oprm1	ensembl_havana	18	0.0001	0.0001	0.0001	0.0001	0.0001	0.0001	0.0308945	0.0001	0.0001	0.0001	0.0001	0.0001	0.0001	0.0001	0.0001	0.0001	0.0001	0.0001	0.0330651	0.0001
14	70438757	70443448	-	ENSMUSG00000000776	protein_coding	ENSMUSG00000000776	Polr3d	ensembl_havana	13	70.4194	65.0635	57.2691	50.8828	46.5078	40.6775	59.4335	44.3289	39.733	36.9216	57.589	58.5785	42.0497	53.7685	51.5102	50.472	52.6459	40.1036	59.5021	60.0453
11	52252371	52283015	-	ENSMUSG00000000782	protein_coding	ENSMUSG00000000782	Tcf7	ensembl_havana	15	15.9561	9.96506	16.9944	15.7071	28.654	12.5953	14.1348	13.4456	17.494	17.8768	13.7018	10.9546	7.36472	14.5361	8.49221	6.56735	37.0079	39.7405	18.5595	9.32872
X	13280970	13294053	+	ENSMUSG00000000787	protein_coding	ENSMUSG00000000787	Ddx3x	ensembl_havana	12	1150.25	920.691	1203.09	1012.64	871.935	907.435	887.314	914.68	820.883	825.336	910.742	1006.59	640.111	778.826	1134.73	1153.55	1037.43	833.031	977.119	1115.98
8	70808449	70821425	+	ENSMUSG00000000791	protein_coding	ENSMUSG00000000791	Il12rb1	ensembl_havana	9	2.48215	4.01197	0.126452	0.858044	0.978854	0.578452	1.1395	0.383346	1.80326	2.51345	1.19675	1.3901	2.88486	4.63531	0.688649	0.405941	1.65112	1.84849	0.164926	0.311054
8	70882889	70892758	-	ENSMUSG00000000792	protein_coding	ENSMUSG00000000792	Slc5a5	ensembl_havana	2	0.744715	1.22954	0.695036	0.46207	0.506352	0.706975	0.585196	0.543032	0.917499	1.34528	0.837756	1.19153	0.40736	0.519243	0.557497	0.774888	0.560825	0.396184	0.989053	0.839676
3	89520164	89675133	+	ENSMUSG00000000794	protein_coding	ENSMUSG00000000794	Kcnn3	ensembl_havana	9	0.0355578	0.0648075	0.31598	0.726053	0.0001	0.0322307	0.0001	0.0959114	0.0001	0.177097	0.0599326	0.0001	0.0001	0.0371817	0.0656761	0.0001	0.0001	0.033107	0.0989953	0.186672
11	84984442	85140162	-	ENSMUSG00000000804	protein_coding	ENSMUSG00000000804	Usp32	ensembl_havana	14	65.6326	68.4283	85.7931	93.0211	100.913	98.3842	110.121	94.4702	104.046	87.5073	100.818	91.6075	77.2777	73.8297	101.315	82.5703	98.0958	114.997	110.4	103.206
11	84957786	84966045	+	ENSMUSG00000000805	protein_coding	ENSMUSG00000000805	Car4	ensembl_havana	18	0.0001	0.0001	0.0001	0.0330979	0.0001	0.257145	0.0308945	0.0639743	0.28481	0.141697	0.0001	0.0331952	0.0001	0.0001	0.0001	0.0369947	0.0312514	0.396184	0.0001	0.0311954
6	89643988	89675530	+	ENSMUSG00000000811	protein_coding	ENSMUSG00000000811	Txnrd3	ensembl_havana	13	30.1038	25.689	21.5115	19.0069	15.0864	15.0373	12.3795	15.1064	24.2637	24.4611	17.6208	17.0772	21.9921	23.3986	17.968	16.861	18.3794	12.7078	19.8121	11.8474
1	161780689	161788496	-	ENSMUSG00000000817	protein_coding	ENSMUSG00000000817	Fasl	ensembl_havana	10	0.106474	0.0001	0.031688	0.0001	0.10135	0.0001	0.0616891	0.0639743	0.0001	0.212496	0.0599326	0.0331952	0.0001	0.0371817	0.0001	0.0001	0.0312514	0.0001	0.0660302	0.155577
2	181582103	181592804	-	ENSMUSG00000000823	protein_coding	ENSMUSG00000000823	Zfp512b	ensembl_havana	16	81.8014	99.7791	73.1895	86.0915	94.7705	109.116	90.1665	85.5278	77.3147	87.9321	86.518	95.6782	78.5674	80.1336	69.2157	90.0599	92.3017	104.665	93.1925	104.698
2	181520485	181555134	+	ENSMUSG00000000826	protein_coding	ENSMUSG00000000826	Dnajc5	ensembl_havana	16	144.101	139.089	183.337	185.745	174.657	170.421	163.427	163.199	186.422	192.36	151.586	154.621	92.2784	104.57	161.94	160.418	181.737	167.874	182.198	209.863
2	181497142	181517967	+	ENSMUSG00000000827	protein_coding	ENSMUSG00000000827	Tpd52l2	ensembl_havana	18	99.7076	104.017	110.337	117.472	127.373	127.109	110.583	103.732	119.515	120.712	97.617	99.3849	97.7086	92.111	112.725	116.403	122.363	147.574	111.983	125.066
X	68678541	68717964	+	ENSMUSG00000000838	protein_coding	ENSMUSG00000000838	Fmr1	ensembl_havana	17	171.829	141.936	170.512	139.878	114.109	127.013	171.495	130.208	136.882	99.2245	172.886	157.897	147.496	142.579	138.595	144.885	130.493	101.563	154.409	147.237
11	24078056	24174124	+	ENSMUSG00000000861	protein_coding	ENSMUSG00000000861	Bcl11a	ensembl_havana	15	0.0001	0.0001	0.0001	0.0990936	0.0001	0.0322307	0.0001	0.0001	0.0001	0.0708987	0.0001	0.0001	0.0001	0.0371817	0.0001	0.0001	0.0001	0.0001	0.0001	0.0001
11	53602982	53618670	-	ENSMUSG00000000869	protein_coding	ENSMUSG00000000869	Il4	ensembl_havana	12	0.0001	0.0001	0.0001	0.0001	0.0001	0.0001	0.0001	0.0001	0.0001	0.0001	0.0001	0.0001	0.0001	0.0001	0.0001	0.0001	0.0001	0.0001	0.0001	0.0001
2	154585758	154603709	-	ENSMUSG00000000876	protein_coding	ENSMUSG00000000876	Pxmp4	ensembl_havana	11	12.1621	12.9093	7.1074	11.0874	11.8464	16.1297	11.6404	13.7331	14.8683	14.5846	12.7145	9.16746	26.8793	23.9178	10.7218	13.8725	9.28321	13.863	12.0983	11.0701
X	100767722	100818411	+	ENSMUSG00000000881	protein_coding	ENSMUSG00000000881	Dlg3	ensembl_havana	12	34.1106	41.9306	41.2224	51.2128	37.564	64.6792	44.4366	53.7184	36.5695	43.9307	31.472	33.0622	38.011	35.7098	27.7716	43.6834	26.5722	37.8261	40.3164	60.4806
16	18498713	18566680	+	ENSMUSG00000000884	protein_coding	ENSMUSG00000000884	Gnb1l	ensembl_havana	17	9.68009	10.7416	8.27615	7.95258	6.34513	9.76783	8.03747	6.9624	8.47813	9.06234	9.1844	9.73008	10.2155	11.755	7.37742	6.67803	7.91255	8.81297	8.57103	8.116
2	27165233	27183201	+	ENSMUSG00000000889	protein_coding	ENSMUSG00000000889	Dbh	ensembl_havana	8	0.0001	0.0324538	0.0001	0.0001	0.0001	0.0001	0.0001	0.0639743	0.0001	0.0001	0.0300163	0.0001	0.0001	0.0001	0.0001	0.0001	0.0001	0.0001	0.0001	0.0311954
10	75923222	75936497	-	ENSMUSG00000000901	protein_coding	ENSMUSG00000000901	Mmp11	ensembl_havana	17	15.1051	31.7715	24.6387	41.6104	58.4554	72.005	55.3071	56.8482	58.7137	61.5242	67.3716	44.4138	27.4223	29.7396	48.6248	57.9985	27.9429	83.7389	68.7324	41.2326
10	75896769	75921618	-	ENSMUSG00000000902	protein_coding	ENSMUSG00000000902	Smarcb1	ensembl_havana	13	124.883	119.224	113.717	132.882	96.188	111.59	98.1423	108.012	112.239	120.783	138.094	123.478	164.94	149.328	109.775	128.541	86.0714	92.3207	101.994	107.808
10	75943057	75949658	+	ENSMUSG00000000903	protein_coding	ENSMUSG00000000903	Vpreb3	ensembl_havana	3	0.106474	0.129515	0.031688	0.0330979	0.135101	0.096492	0.277251	0.255597	0.442982	0.283295	0.299263	0.198671	0.0340383	0.0001	0.16404	0.184573	0.0312514	0.264156	0.263821	0.0311954
5	123973628	124005559	+	ENSMUSG00000000915	protein_coding	ENSMUSG00000000915	Hip1r	ensembl_havana	15	24.2533	32.1597	20.1532	17.159	16.7064	14.2661	13.9192	14.0205	17.6521	15.8944	16.5139	17.5736	12.693	18.578	23.3124	37.3375	16.1054	13.0049	22.4164	30.94
5	135369953	135376806	+	ENSMUSG00000000916	protein_coding	ENSMUSG00000000916	Nsun5	ensembl_havana	15	51.5558	55.325	25.2389	24.4185	25.954	25.1263	24.0814	26.5718	25.3393	26.408	36.2287	41.1374	42.1176	52.4707	25.0502	29.3313	31.1826	28.1221	23.702	24.8142
15	75657035	75678801	-	ENSMUSG00000000934	protein_coding	ENSMUSG00000000934	Top1mt	ensembl_havana	9	29.2528	28.9567	10.6137	8.87652	11.4752	8.03277	13.3341	9.35768	10.8507	10.6553	18.8773	18.0701	21.8225	24.474	19.6729	11.5481	15.42	13.764	14.3729	16.263
6	52231197	52240855	-	ENSMUSG00000000938	protein_coding	ENSMUSG00000000938	Hoxa10	ensembl_havana	11	0.0001	0.0324538	0.126452	0.231085	0.0001	0.0001	0.0001	0.0320371	0.0001	0.0001	0.0001	0.0001	0.475237	0.0371817	0.0001	0.0001	0.0001	0.0001	0.0660302	0.0001
6	52189671	52191754	-	ENSMUSG00000000942	protein_coding	ENSMUSG00000000942	Hoxa4	ensembl_havana	10	0.99292	0.485407	0.126452	0.264083	0.0338501	0.0643614	0.123278	0.574969	5.18815	5.91179	0.508677	0.264861	8.00955	3.00372	0.262405	0.0001	0.0935542	0.033107	0.0001	0.0311954
7	59974149	60005065	-	ENSMUSG00000000948	protein_coding	ENSMUSG00000000948	Gm38393	havana	16	2.30486	1.71485	0.884564	0.990036	1.0126	2.53842	1.04711	1.82052	0.917499	1.27448	1.52583	2.052	2.61335	1.8171	0.0001	0.0369947	0.841187	0.99031	1.48353	3.54498
14	54431612	54445365	+	ENSMUSG00000000957	protein_coding	ENSMUSG00000000957	Mmp14	ensembl_havana	11	31.2739	62.0546	233.404	195.71	262.137	192.302	260.984	348.722	240.485	185.068	249.113	240.668	104.055	104.2	165.055	203.179	69.4988	82.9467	318.08	195.279
14	54369442	54417781	-	ENSMUSG00000000958	protein_coding	ENSMUSG00000000958	Slc7a7	ensembl_havana	10	1.77299	3.91491	1.07409	4.6198	2.83511	4.04857	1.81698	4.43936	1.80326	3.50464	2.30365	2.87938	5.36236	6.86021	2.1969	3.50509	2.08724	4.42304	2.90103	2.76759
14	54360834	54369674	+	ENSMUSG00000000959	protein_coding	ENSMUSG00000000959	Oxa1l	ensembl_havana	7	99.1048	107.479	83.3292	90.3482	65.8466	89.6447	87.6105	87.6995	64.2813	70.197	79.3979	90.0189	92.8215	106.165	94.8888	93.4911	62.2717	80.2071	71.6333	88.964
11	83753696	83783755	+	ENSMUSG00000000976	protein_coding	ENSMUSG00000000976	Heatr6	ensembl_havana	13	59.392	64.6429	45.4236	52.1037	53.8316	52.0518	51.119	51.4189	60.5485	61.6304	61.0892	64.3371	68.6574	71.7161	49.3461	55.5634	59.3746	58.1584	49.5796	55.3499
11	83647844	83649356	-	ENSMUSG00000000982	protein_coding	ENSMUSG00000000982	Ccl3	ensembl_havana	5	0.0001	0.0001	0.0001	0.0330979	0.0001	0.0001	0.0001	0.0001	0.0001	0.0001	0.0300163	0.0001	0.0001	0.0371817	0.0001	0.0369947	0.0001	0.0001	0.0001	0.0001
11	83709015	83711349	+	ENSMUSG00000000983	protein_coding	ENSMUSG00000000983	Wfdc18	ensembl_havana	13	0.0001	0.0001	0.031688	0.0330979	0.202601	0.257145	0.0001	0.0001	0.126638	0.0001	0.0001	0.0001	0.0001	0.0001	0.0001	0.0369947	0.0624028	0.0001	0.0330651	0.0001
9	21029373	21030596	+	ENSMUSG00000001014	protein_coding	ENSMUSG00000001014	Icam4	ensembl_havana	6	1.17021	1.42367	0.600272	0.825046	1.24886	2.44203	0.769963	0.958214	1.07567	1.09748	1.49591	1.25772	3.76726	4.07908	1.90181	2.13999	1.99379	1.8815	0.593472	0.932962
3	90476126	90488380	+	ENSMUSG00000001016	protein_coding	ENSMUSG00000001016	Ilf2	ensembl_havana	12	292.456	257.86	205.385	203.696	204.391	178.55	205.369	187.503	173.768	166.448	206.722	197.644	179.771	203.245	169.252	201.15	222.857	213.687	182.891	200.037
3	90498956	90509499	-	ENSMUSG00000001017	protein_coding	ENSMUSG00000001017	Chtop	ensembl_havana	15	223.952	195.029	148.622	177.199	142.257	142.178	143.718	149.562	131.884	126.482	156.881	151.808	151.874	180.922	129.021	146.841	152.393	148.202	143.398	167.635
3	90488026	90491034	-	ENSMUSG00000001018	protein_coding	ENSMUSG00000001018	Snapin	ensembl_havana	15	31.8412	33.0333	34.1783	39.7955	48.9716	48.7423	34.0281	37.5582	43.4026	40.3908	42.0325	35.1472	57.6953	49.8749	32.821	36.6734	41.3068	58.3565	35.2068	33.3655
3	90603771	90606046	+	ENSMUSG00000001020	protein_coding	ENSMUSG00000001020	S100a4	ensembl_havana	8	41.4858	28.0508	8.49727	4.25682	12.9602	7.51868	21.4639	8.75088	12.907	4.92061	24.9802	7.08246	92.8893	41.8653	21.7058	8.63345	5.76311	15.4144	13.1861	6.18808
3	90584659	90602703	+	ENSMUSG00000001021	protein_coding	ENSMUSG00000001021	S100a3	ensembl_havana	13	5.77973	3.39725	4.54877	3.79485	4.48887	4.78757	4.61928	2.65088	3.8595	2.44266	4.9662	4.89818	1.69702	2.07667	9.3447	9.07618	4.39245	4.85213	8.20841	8.116
3	90608523	90611781	+	ENSMUSG00000001023	protein_coding	ENSMUSG00000001023	S100a5	ensembl_havana	10	0.177389	0.0648075	0.063276	0.0001	0.0001	0.0322307	0.0308945	0.0959114	0.0317345	0.106298	0.0599326	0.0331952	0.0679767	0.0001	0.0001	0.0001	0.0001	0.0001	0.0001	0.0001
3	90612882	90624182	+	ENSMUSG00000001025	protein_coding	ENSMUSG00000001025	S100a6	ensembl_havana	8	1471.96	1083.27	1306.95	902.887	1203.63	998.975	1473.49	1028.02	1118.85	880.772	1590.86	1345.12	1677.23	1332.12	1139.81	989.367	1353.15	1608.83	1720.58	1046.27
11	106318592	106353289	-	ENSMUSG00000001027	protein_coding	ENSMUSG00000001027	Scn4a	ensembl_havana	7	0.141931	0.161869	0.031688	0.0990936	0.10135	0.0643614	0.215662	0.191723	0.189907	0.141697	0.209514	0.0993855	0.101915	0.296753	0.0656761	0.0738893	0.0624028	0.033107	0.197891	0.248863
11	106377656	106388076	-	ENSMUSG00000001029	protein_coding	ENSMUSG00000001029	Icam2	ensembl_havana	15	0.141931	0.0324538	0.031688	0.0990936	0.168851	0.0001	0.0924836	0.0001	0.0950034	0.0708987	0.0898489	0.0331952	0.0340383	0.0001	0.0656761	0.0001	0.0935542	0.066114	0.263821	0.0933862
11	61488812	61494407	-	ENSMUSG00000001034	protein_coding	ENSMUSG00000001034	Mapk7	ensembl_havana	17	47.8327	55.2603	43.6863	48.144	35.1678	41.3523	37.4155	43.6901	38.5625	42.0545	52.1442	49.2788	52.4009	52.619	35.9686	39.5143	39.2508	37.232	41.7339	45.4305
11	61517249	61579688	-	ENSMUSG00000001036	protein_coding	ENSMUSG00000001036	Epn2	ensembl_havana	17	81.0922	113.432	62.955	79.2939	62.7754	79.6521	65.0381	75.2121	77.0616	66.8341	69.376	65.363	61.9715	67.7483	60.3957	63.9754	67.3182	54.9568	61.1174	76.1527
11	61505144	61512932	+	ENSMUSG00000001039	protein_coding	ENSMUSG00000001039	B9d1	ensembl_havana	12	10.9211	12.3916	10.8664	11.4174	10.6651	8.4826	9.36164	9.99643	14.0142	17.6644	13.253	11.8482	14.8651	15.8711	14.1645	14.389	10.3424	12.7408	11.2742	9.29762
3	129982759	130061554	-	ENSMUSG00000001052	protein_coding	ENSMUSG00000001052	Sec24b	ensembl_havana	15	252.85	191.826	154.655	171.028	197.135	169.875	168.6	157.067	158.963	149.35	159.574	158.857	166.943	169.834	150.301	167.28	174.292	177.644	183.88	199.135
11	51643063	51650843	-	ENSMUSG00000001053	protein_coding	ENSMUSG00000001053	N4bp3	ensembl_havana	15	15.4243	14.0093	9.53967	10.1634	14.8502	12.2098	14.8431	11.2739	14.3305	11.7881	15.8857	12.5432	16.2566	16.761	7.21347	8.70724	20.965	19.0121	11.3401	10.8213
11	51623671	51635897	-	ENSMUSG00000001054	protein_coding	ENSMUSG00000001054	Rmnd5b	ensembl_havana	9	27.2317	30.8332	25.9654	35.8028	51.8403	44.3726	71.9053	59.5948	49.255	57.4887	54.9862	43.4209	37.1286	37.0818	28.1651	27.4128	51.7426	91.0664	40.2835	38.1852
11	51619735	51623715	+	ENSMUSG00000001056	protein_coding	ENSMUSG00000001056	Nhp2	ensembl_havana	3	250.439	244.271	182.358	165.121	187.415	170.357	179.224	168.884	168.011	204.75	239.869	240.966	176.717	237.397	186.761	209.672	253.822	224.514	179.363	182.001
8	123242356	123254349	-	ENSMUSG00000001062	protein_coding	ENSMUSG00000001062	Vps9d1	ensembl_havana	18	15.247	20.7389	13.9304	16.235	17.1789	22.3309	21.8642	19.9928	15.849	19.1158	18.249	18.3348	19.0395	21.9154	19.3123	20.4028	18.8467	20.2334	14.2081	16.3252
8	123254195	123269746	+	ENSMUSG00000001065	protein_coding	ENSMUSG00000001065	Zfp276	ensembl_havana	15	23.1895	30.7038	16.7101	18.3469	16.3014	17.8005	16.6907	18.1723	19.9931	23.8239	23.7836	27.6677	20.6685	26.3281	19.8697	23.0593	19.7501	16.8997	23.9328	23.6948
15	99084086	99087818	-	ENSMUSG00000001076	protein_coding	ENSMUSG00000001076	C1ql4	ensembl_havana	7	0.0710157	0.0648075	0.094864	0.132091	0.0001	0.0322307	0.0308945	0.0320371	0.0950034	0.0001	0.179598	0.0001	0.169792	0.111345	0.16404	0.0369947	0.0935542	0.0001	0.0001	0.0001
5	34633642	34637213	-	ENSMUSG00000001082	protein_coding	ENSMUSG00000001082	Mfsd10	ensembl_havana	12	104.601	110.165	102.851	113.447	96.6943	106.256	78.7109	75.8828	98.8261	121.951	85.3513	93.7918	95.1971	96.4124	73.1503	88.8055	88.2208	102.157	76.0836	84.4552
4	136469761	136554781	+	ENSMUSG00000001089	protein_coding	ENSMUSG00000001089	Luzp1	ensembl_havana	14	161.05	136.307	243.891	200.462	176.378	196.094	194.591	212.095	234.633	227.087	178.959	209.923	105.854	117.846	216.467	219.154	168.436	184.443	212.394	227.992
11	78397087	78422218	-	ENSMUSG00000001095	protein_coding	ENSMUSG00000001095	Slc13a2	ensembl_havana	5	0.0001	0.0001	0.0001	0.0001	0.0001	0.0322307	0.0308945	0.0001	0.0001	0.0001	0.0001	0.0331952	0.0001	0.0001	0.0001	0.0001	0.0001	0.0001	0.263821	0.0001
5	114363567	114380509	-	ENSMUSG00000001098	protein_coding	ENSMUSG00000001098	Kctd10	ensembl_havana	15	301.817	289.081	726.271	614.849	295.854	299.362	389.366	399.374	436.904	414.527	409.973	362.889	203.63	225.939	510.412	454.948	325.75	242.569	401.054	337.852
11	78512193	78522737	+	ENSMUSG00000001100	protein_coding	ENSMUSG00000001100	Poldip2	ensembl_havana	10	144.774	145.689	109.737	123.709	115.459	112.779	118.282	101.496	123.976	115.862	133.576	132.017	168.572	165.904	107.709	117.805	108.999	142.92	110.862	102.428
11	78503447	78505082	+	ENSMUSG00000001103	protein_coding	ENSMUSG00000001103	Sebox	ensembl_havana	7	0.0001	0.0001	0.0001	0.0001	0.0001	0.0322307	0.0001	0.0001	0.0001	0.0001	0.0001	0.0001	0.0001	0.0001	0.0001	0.0001	0.0001	0.0001	0.0001	0.0001
11	78536361	78541738	+	ENSMUSG00000001105	protein_coding	ENSMUSG00000001105	Ift20	ensembl_havana	15	33.0468	41.4453	30.4193	34.9118	41.074	42.6375	53.0283	49.7582	39.8595	38.0544	42.6607	34.9817	41.337	41.717	32.7226	33.5742	38.0048	52.5803	42.2943	40.3308
10	76708792	76726169	-	ENSMUSG00000001119	protein_coding	ENSMUSG00000001119	Col6a1	ensembl_havana	7	216.931	144.168	139.524	221.251	347.154	136.298	697.743	200.629	339.564	180.218	148.594	34.8493	459.118	216.965	30.9848	21.6573	319.177	362.813	240.777	27.6439
10	76761857	76961888	-	ENSMUSG00000001120	protein_coding	ENSMUSG00000001120	Pcbp3	ensembl_havana	15	20.3529	20.7065	7.23375	7.7546	5.29887	10.2819	5.88186	9.00638	5.21979	4.28342	12.3854	9.39913	30.884	27.8855	14.7547	17.562	6.29268	6.30444	13.8125	27.0531
11	78962974	78984947	-	ENSMUSG00000001123	protein_coding	ENSMUSG00000001123	Lgals9	ensembl_havana	15	72.9724	57.1692	109.989	67.1837	142.088	73.6758	129.06	77.0006	163.392	127.863	118.259	89.7873	40.6922	28.2934	151.153	70.9116	188.746	128.1	124.246	97.3909
X	20797814	20860520	+	ENSMUSG00000001127	protein_coding	ENSMUSG00000001127	Araf	ensembl_havana	12	57.2291	67.5224	76.2535	83.6497	73.0354	95.3318	88.1956	77.6393	81.3956	65.2057	84.1546	81.5466	92.516	86.6229	84.0687	91.8678	67.8478	73.8698	78.8527	94.157
X	20925454	20931556	-	ENSMUSG00000001128	protein_coding	ENSMUSG00000001128	Cfp	ensembl_havana	7	4.5387	5.56495	2.68508	2.37595	2.90261	3.88791	4.15736	3.80062	3.03701	3.07984	3.91913	5.56009	4.31027	5.56235	3.67236	4.61193	1.83803	3.46584	4.97783	4.94427
X	20870166	20874736	+	ENSMUSG00000001131	protein_coding	ENSMUSG00000001131	Timp1	ensembl_havana	11	32.8341	42.9336	104.019	41.5774	80.3255	51.9875	67.0706	31.9053	58.1759	36.2844	63.4226	76.483	17.7159	22.8424	64.8877	68.1445	83.3924	64.1327	102.423	59.299
X	20941722	20962018	-	ENSMUSG00000001134	protein_coding	ENSMUSG00000001134	Uxt	ensembl_havana	9	9.00639	7.40911	10.1083	12.0113	8.26889	10.8603	10.0699	8.27182	8.92102	8.56674	11.6974	11.0539	6.17688	7.0827	13.476	10.552	9.22091	8.4829	11.0434	10.8213
1	36511867	36528238	+	ENSMUSG00000001138	protein_coding	ENSMUSG00000001138	Cnnm3	ensembl_havana	13	25.0333	26.6596	17.0892	24.8475	20.4189	20.2746	16.4444	19.8331	21.9544	21.4167	22.4672	23.1336	33.7009	27.181	19.1811	24.3875	15.7316	22.1808	15.7904	18.1909
1	36419871	36445272	-	ENSMUSG00000001143	protein_coding	ENSMUSG00000001143	Lman2l	ensembl_havana	13	14.6796	19.6388	19.6794	20.8547	20.7902	17.3185	13.796	20.1205	19.8033	22.7973	21.3603	21.5781	29.0513	24.0661	18.1975	18.4843	18.9713	15.6124	15.7245	24.8453
10	76468927	76515858	+	ENSMUSG00000001150	protein_coding	ENSMUSG00000001150	Mcm3ap	ensembl_havana	7	98.7857	101.332	94.7957	99.2906	86.198	91.1227	85.886	98.8136	94.3024	98.0917	96.2707	91.1442	111.759	111.319	95.1183	97.402	81.5233	77.5336	84.5556	96.769
10	76351263	76442787	-	ENSMUSG00000001151	protein_coding	ENSMUSG00000001151	Pcnt	ensembl_havana	10	105.168	100.847	100.039	97.0798	71.6854	81.4835	80.7434	80.4178	79.6557	81.0646	96.3904	85.9482	119.904	108.279	94.9543	90.3551	77.5359	61.4921	91.4783	96.0849
10	76575648	76590339	+	ENSMUSG00000001155	protein_coding	ENSMUSG00000001155	Ftcd	ensembl_havana	13	0.0001	0.0001	0.0001	0.0330979	0.0001	0.0001	0.0001	0.0001	0.0001	0.0001	0.0001	0.0662903	0.0001	0.0371817	0.0001	0.0001	0.0312514	0.0001	0.0001	0.0001
6	86647042	86669162	-	ENSMUSG00000001156	protein_coding	ENSMUSG00000001156	Mxd1	ensembl_havana	9	6.5598	9.64152	6.69675	12.0443	8.16764	13.5592	8.19144	11.4336	9.30063	12.1775	10.4708	12.2453	12.2179	14.5361	9.44306	12.9501	7.47643	12.3777	9.19737	11.3499
6	86691768	86733384	-	ENSMUSG00000001157	protein_coding	ENSMUSG00000001157	Gmcl1	ensembl_havana	13	30.2102	30.6391	23.6595	25.8044	35.0665	31.199	24.297	29.1907	25.3393	27.6116	39.2802	31.4405	34.6172	30.9262	24.1321	27.2284	31.6811	27.2969	24.0646	25.9648
6	86675151	86684523	-	ENSMUSG00000001158	protein_coding	ENSMUSG00000001158	Snrnp27	ensembl_havana	13	55.208	58.7545	51.299	49.3319	50.1191	54.7829	39.6635	46.9477	44.5098	46.6565	58.0676	54.8719	67.0283	63.521	47.2149	51.5419	57.5367	46.639	46.6128	45.3683
5	120800194	120812515	-	ENSMUSG00000001166	protein_coding	ENSMUSG00000001166	Oas1c	ensembl_havana	17	1.38296	0.808944	0.379156	0.891042	0.742603	0.867628	0.95473	0.543032	1.58182	1.06208	1.88483	1.02605	2.88486	0.964223	1.47556	0.405941	0.872339	1.02332	0.923123	0.622008
5	120861421	120873507	+	ENSMUSG00000001168	protein_coding	ENSMUSG00000001168	Oas1h	ensembl_havana	16	0.0001	0.0001	0.0001	0.0001	0.0001	0.0001	0.0001	0.0001	0.0001	0.0001	0.0001	0.0001	0.0001	0.0001	0.0001	0.0001	0.0001	0.0001	0.0001	0.0001
X	47912387	47965869	+	ENSMUSG00000001173	protein_coding	ENSMUSG00000001173	Ocrl	ensembl_havana	15	30.4584	30.3803	43.2441	47.946	20.9589	40.292	37.3539	44.4885	36.6328	30.5497	41.9128	42.3288	49.2786	40.2708	58.8547	52.9439	15.8562	20.1014	55.7771	57.1223
12	100199435	100209815	+	ENSMUSG00000001175	protein_coding	ENSMUSG00000001175	Calm1	ensembl_havana	15	285.79	310.499	485.192	640.653	376.787	540.31	313.766	466.314	421.877	471.343	443.958	495.269	377.802	336.628	603.727	526.745	373.91	351.228	336.013	411.517
10	78269178	78352490	-	ENSMUSG00000001211	protein_coding	ENSMUSG00000001211	Agpat3	ensembl_havana	15	110.841	98.8732	108.789	129.583	94.973	113.775	120.776	130.368	115.023	113.809	117.033	111.796	114.135	105.98	123.087	123.191	76.321	75.157	125.432	157.187
12	31390871	31473918	+	ENSMUSG00000001225	protein_coding	ENSMUSG00000001225	Slc26a3	ensembl_havana	12	0.0001	0.0001	0.0001	0.0330979	0.0001	0.0322307	0.0001	0.0001	0.0001	0.141697	0.0001	0.0001	0.0001	0.0001	0.0328881	0.0369947	0.0001	0.033107	0.0330651	0.0311954
17	56123085	56140344	-	ENSMUSG00000001227	protein_coding	ENSMUSG00000001227	Sema6b	ensembl_havana	12	0.780173	2.42663	0.284392	0.528066	0.337601	0.706975	0.184867	1.08596	0.56952	0.814285	0.389012	0.297956	0.40736	1.48337	0.229616	0.848677	0.0935542	0.759261	0.197891	0.715294
17	56303321	56323487	+	ENSMUSG00000001228	protein_coding	ENSMUSG00000001228	Uhrf1	ensembl_havana	14	201.933	203.829	166.69	190.596	169.426	172.638	136.913	149.306	156.654	197.245	197.717	222.433	259.425	239.14	127.382	185.137	216.751	166.917	132.817	147.61
17	56186807	56218906	-	ENSMUSG00000001229	protein_coding	ENSMUSG00000001229	Dpp9	ensembl_havana	9	100.878	105.926	108.157	94.7039	110.363	98.2557	89.1195	109.097	109.36	128.075	137.675	131.62	116.544	122.778	118.791	105.15	110.743	107.141	105.983	103.703
11	101246028	101259547	+	ENSMUSG00000001240	protein_coding	ENSMUSG00000001240	Ramp2	ensembl_havana	13	0.177389	0.323638	0.252804	0.264083	0.10135	0.353538	0.308045	0.479157	0.411348	0.460292	0.418928	0.827479	1.22188	0.44508	0.426345	0.221468	0.342765	0.231149	0.13196	0.155577
7	30957770	30973465	-	ENSMUSG00000001247	protein_coding	ENSMUSG00000001247	Lsr	ensembl_havana	16	24.9979	10.9357	103.482	91.9651	271.149	126.916	323.743	82.4618	142.387	92.9234	144.915	64.3702	33.1579	15.3519	174.334	94.4873	282.263	295.776	170.265	45.8347
7	31130127	31155897	-	ENSMUSG00000001248	protein_coding	ENSMUSG00000001248	Gramd1a	ensembl_havana	15	38.5073	65.1929	26.3129	53.8526	35.0328	58.992	38.832	50.6205	37.6451	43.6121	32.6388	42.3619	34.3118	55.2889	29.9684	71.0961	26.1361	40.3347	34.9102	58.9259
7	31098725	31115291	-	ENSMUSG00000001249	protein_coding	ENSMUSG00000001249	Hpn	ensembl_havana	14	0.106474	0.550114	0.031688	0.0990936	0.0001	0.192884	0.0616891	0.0959114	0.0633689	0.106298	0.0001	0.0662903	0.40736	0.333835	0.131252	0.221468	0.0001	0.033107	0.0001	0.186672
5	70751047	70842618	-	ENSMUSG00000001260	protein_coding	ENSMUSG00000001260	Gabrg1	ensembl_havana	10	0.0001	0.0001	0.0001	0.0001	0.0001	0.0001	0.0001	0.0320371	0.0001	0.0001	0.0001	0.0001	0.0001	0.0001	0.0001	0.0369947	0.0001	0.033107	0.0001	0.0001
12	111669361	111672339	-	ENSMUSG00000001270	protein_coding	ENSMUSG00000001270	Ckb	ensembl_havana	9	4.46779	20.0271	14.1515	26.4314	35.674	20.8529	20.6324	22.0687	21.9544	14.0536	23.275	14.2972	22.1279	30.37	10.9185	7.78487	27.6625	30.6306	10.516	6.40575
15	102406143	102436405	+	ENSMUSG00000001280	protein_coding	ENSMUSG00000001280	Sp1	ensembl_havana	13	176.261	179.984	152.096	166.87	158.187	159.947	149.354	153.682	161.336	162.696	136.538	140.555	205.191	185.334	139.841	143.262	172.859	164.045	138.454	161.105
15	102215995	102231945	-	ENSMUSG00000001281	protein_coding	ENSMUSG00000001281	Itgb7	ensembl_havana	10	1.77299	1.45602	0.537096	0.165089	0.168851	0.0643614	0.184867	0.287534	1.10731	0.601889	0.418928	0.132481	1.12007	0.111345	1.21326	0.332152	0.155857	0.132128	0.329751	0.186672
15	102331709	102338140	+	ENSMUSG00000001285	protein_coding	ENSMUSG00000001285	Myg1	ensembl_havana	12	72.5469	70.2078	70.3466	71.1765	68.3441	64.3257	63.3137	61.511	75.3534	87.1179	65.8159	69.4668	75.0717	72.9027	60.2974	63.3113	85.3549	85.6203	70.2488	76.4015
15	102234938	102257518	-	ENSMUSG00000001288	protein_coding	ENSMUSG00000001288	Rarg	ensembl_havana	15	58.3637	84.0875	55.0264	46.4611	42.3903	57.7068	54.9067	63.2037	89.3358	83.1532	50.5586	40.641	80.6715	59.9982	58.0678	38.1123	39.9985	53.3064	55.2826	41.699
15	102326116	102331874	+	ENSMUSG00000001289	protein_coding	ENSMUSG00000001289	Pfdn5	ensembl_havana	12	57.0872	64.3841	66.6824	77.743	55.0803	72.0692	56.5697	73.4875	74.1829	93.1004	65.457	71.9159	76.022	78.7616	57.7399	67.3697	71.2122	75.5201	61.0185	65.9534
8	8617434	8661243	-	ENSMUSG00000001300	protein_coding	ENSMUSG00000001300	Efnb2	ensembl_havana	16	121.266	82.3728	176.451	62.795	184.242	97.0669	175.591	151.318	217.012	212.467	130.046	137.775	71.067	58.07	89.6099	77.442	189.65	127.869	146.332	81.128
1	186720978	186749359	-	ENSMUSG00000001305	protein_coding	ENSMUSG00000001305	Rrp15	ensembl_havana	5	111.586	101.138	94.8904	75.5652	77.6592	63.4903	72.3672	62.8205	76.2391	81.631	92.8304	92.9975	96.6565	89.2557	91.3149	81.4266	107.348	82.7157	88.4785	85.7923
11	101464999	101471854	+	ENSMUSG00000001313	protein_coding	ENSMUSG00000001313	Rnd2	ensembl_havana	12	6.87892	7.89442	5.528	6.69866	7.42513	6.0728	9.97753	11.6891	12.211	12.0359	8.52624	10.6236	2.51154	3.78243	9.9021	6.27219	6.69765	8.4829	11.3401	8.98667
11	74906359	74925949	-	ENSMUSG00000001323	protein_coding	ENSMUSG00000001323	Srr	ensembl_havana	17	5.28332	8.6062	4.42242	7.78759	7.02013	10.4426	8.40701	9.96449	9.30063	11.4695	8.01767	6.28818	15.5778	14.4249	5.41013	7.63729	6.23038	10.7274	7.87876	9.01777
4	129287617	129308560	+	ENSMUSG00000001333	protein_coding	ENSMUSG00000001333	Sync	ensembl_havana	9	1.06384	1.39131	5.81229	5.74173	5.19762	6.00854	7.39079	8.3357	8.06689	8.14195	5.77394	6.68532	0.0340383	0.148427	11.2792	8.89171	3.98748	2.07954	9.29626	6.0637
4	129136999	129144594	+	ENSMUSG00000001334	protein_coding	ENSMUSG00000001334	Fndc5	ensembl_havana	9	0.0001	0.0324538	0.0001	0.0330979	0.0338501	0.0643614	0.33884	0.127849	0.158272	0.177097	0.0599326	0.0662903	0.0001	0.0001	0.0984642	0.0738893	0.0001	0.0001	0.0660302	0.0933862
9	22126727	22135712	-	ENSMUSG00000001348	protein_coding	ENSMUSG00000001348	Acp5	ensembl_havana	15	3.47497	4.78846	0.726624	0.396074	16.9089	7.06885	10.3779	4.66292	7.4342	4.00023	5.86369	3.34271	4.68359	3.85659	2.78709	1.07004	26.4476	30.3335	1.21981	0.248863
9	22099216	22109631	+	ENSMUSG00000001349	protein_coding	ENSMUSG00000001349	Cnn1	ensembl_havana	5	21.9485	17.9241	79.9177	32.041	115.021	48.646	94.9704	47.4587	111.86	80.6044	111.737	93.0637	1.66308	9.01095	253.911	153.113	91.3048	40.6647	177.88	252.37
9	78081499	78109066	-	ENSMUSG00000001366	protein_coding	ENSMUSG00000001366	Fbxo9	ensembl_havana	14	27.1608	26.3361	22.9014	27.2893	19.3052	25.7689	24.143	26.0927	20.5941	19.4343	30.4549	32.8305	22.6709	25.2898	24.46	25.937	17.9121	12.8728	22.9768	26.68
6	3498382	3603532	+	ENSMUSG00000001376	protein_coding	ENSMUSG00000001376	Vps50	ensembl_havana	17	69.6393	75.4167	64.7871	61.1121	73.7442	70.045	66.7318	79.0126	74.3727	88.6401	84.5435	78.0054	80.1625	90.2198	65.8058	62.8686	77.9409	75.124	68.8642	75.2199
18	36766528	36783206	-	ENSMUSG00000001380	protein_coding	ENSMUSG00000001380	Hars	ensembl_havana	7	232.71	222.853	202.384	185.019	157.85	152.942	211.497	194.657	176.077	176.395	205.316	213.828	191.175	186.78	208.237	197.018	163.763	137.474	219.02	201.312
18	36793876	36799667	+	ENSMUSG00000001383	protein_coding	ENSMUSG00000001383	Zmat2	ensembl_havana	9	70.7385	90.0083	76.3167	96.2878	62.3704	86.8815	66.4239	92.3304	78.1372	93.5252	81.9408	86.5439	103.784	96.8574	78.8226	103.01	56.2284	73.4407	67.8423	72.5146
2	164769898	164778823	+	ENSMUSG00000001403	protein_coding	ENSMUSG00000001403	Ube2c	ensembl_havana	13	211.861	254.689	240.859	221.218	185.457	193.652	166.568	183.287	153.079	183.227	174.502	202.013	137.043	194.938	219.746	241.623	181.332	149.39	156.65	196.368
3	88336260	88362339	+	ENSMUSG00000001415	protein_coding	ENSMUSG00000001415	Smg5	ensembl_havana	10	416.772	336.253	257.284	201.089	241.752	190.985	225.17	210.562	227.23	222.556	269.995	254.171	188.731	260.833	251.124	225.279	280.83	239.895	235.602	249.758
3	88297116	88321768	+	ENSMUSG00000001416	protein_coding	ENSMUSG00000001416	Cct3	ensembl_havana	13	1235.21	992.452	758.396	699.258	689.516	605.953	652.228	633.825	627.311	605.435	863.175	807.158	957.163	1000.46	713.501	746.084	809.344	696.976	680.169	682.979
3	88325023	88331314	+	ENSMUSG00000001418	protein_coding	ENSMUSG00000001418	Glmp	ensembl_havana	13	91.8359	106.897	72.0523	114.371	140.839	130.354	116.003	111.972	122.014	109.667	103.57	103.29	117.766	118.661	91.6427	92.4212	107.285	169.854	109.543	123.356
3	88142372	88172087	+	ENSMUSG00000001419	protein_coding	ENSMUSG00000001419	Mef2d	ensembl_havana	17	259.871	238.253	119.087	153.143	167.57	204.512	155.512	150.743	141.564	134.093	172.497	183.943	268.588	266.432	145.579	184.436	148.25	188.635	151.64	175.627
3	88328655	88336149	-	ENSMUSG00000001420	protein_coding	ENSMUSG00000001420	Tmem79	ensembl_havana	13	5.77973	6.0179	2.84302	2.50794	2.19386	2.47416	2.77161	2.71476	2.40432	3.25684	3.23106	2.21748	7.97561	3.41161	2.39363	1.91862	2.46106	2.87171	3.09882	1.89692
6	28475139	28935163	+	ENSMUSG00000001424	protein_coding	ENSMUSG00000001424	Snd1	ensembl_havana	14	472.263	473.724	300.844	341.99	464.841	471.936	445.104	409.85	419.473	421.925	406.712	398.764	719.086	593.566	411.49	393.592	425.061	490.748	354.21	389.19
10	77052178	77166549	-	ENSMUSG00000001435	protein_coding	ENSMUSG00000001435	Col18a1	ensembl_havana	15	36.2026	31.6421	11.7824	75.4002	5.46762	5.62297	9.14608	6.73884	17.4307	8.10655	11.7871	19.9565	29.4925	72.124	13.5416	8.37519	5.35814	4.98416	7.87876	3.76264
10	77032241	77061003	+	ENSMUSG00000001436	protein_coding	ENSMUSG00000001436	Slc19a1	ensembl_havana	15	147.079	123.656	66.2401	70.3185	44.0103	49.16	48.4399	56.4011	48.0212	50.3026	96.6896	102.628	155.913	156.04	99.6102	92.1629	54.3281	47.5962	52.6784	57.8997
11	97159714	97187882	-	ENSMUSG00000001440	protein_coding	ENSMUSG00000001440	Kpnb1	ensembl_havana	5	1305.03	1107.5	1396.88	1153.47	1059.92	923.082	1010.98	997.525	1054.6	1094.76	1300.1	1333.6	872.114	973.802	1268.21	1126.98	1304	1002.79	1262.5	1163.93
11	97205842	97280639	-	ENSMUSG00000001441	protein_coding	ENSMUSG00000001441	Npepps	ensembl_havana	13	178.105	167.528	168.901	152.714	151.741	154.549	177.992	161.155	139.571	113.597	179.348	153.694	160.596	152.962	151.022	141.417	136.474	136.979	170.792	158.898
11	97098071	97115332	-	ENSMUSG00000001444	protein_coding	ENSMUSG00000001444	Tbx21	ensembl_havana	2	0.0355578	0.0001	0.031688	0.0001	0.0001	0.0322307	0.0308945	0.0001	0.0633689	0.106298	0.0300163	0.0001	0.0001	0.0001	0.131252	0.0369947	0.0001	0.033107	0.0660302	0.155577
11	97041560	97049214	+	ENSMUSG00000001445	protein_coding	ENSMUSG00000001445	Mrpl10	ensembl_havana	10	110.77	116.668	95.1747	101.172	103.141	100.184	95.6787	93.1927	101.357	112.712	123.465	119.838	143.424	146.436	113.906	102.014	106.787	126.978	106.576	100.811
5	4081145	4104747	-	ENSMUSG00000001467	protein_coding	ENSMUSG00000001467	Cyp51	ensembl_havana	5	278.061	223.662	151.307	199.472	168.076	169.072	189.633	169.395	253.329	174.519	145.304	111.365	193.211	183.369	131.284	135.145	171.52	223.358	139.377	83.087
8	123373753	123403836	+	ENSMUSG00000001472	protein_coding	ENSMUSG00000001472	Tcf25	ensembl_havana	17	463.044	464.212	283.534	297.443	351.744	339.236	343.944	302.253	347.853	362.029	338.653	331.878	387.44	439.455	408.015	340.427	426.525	377.237	374.945	344.972
18	67390717	67402750	+	ENSMUSG00000001473	protein_coding	ENSMUSG00000001473	Tubb6	ensembl_havana	7	346.53	344.374	469.019	343.937	278.945	255.696	329.625	281.718	344.594	282.275	353.73	405.614	181.299	201.539	521.035	390.05	285.876	170.811	486.071	429.396
8	123423527	123463271	+	ENSMUSG00000001482	protein_coding	ENSMUSG00000001482	Def8	ensembl_havana	15	229.235	270.283	58.8169	69.6586	77.5579	79.3629	65.0381	72.1461	60.0739	59.6834	121.071	96.0422	318.07	321.35	96.4626	78.3274	87.9716	76.6094	89.1707	88.2177
11	101877510	101894375	-	ENSMUSG00000001493	protein_coding	ENSMUSG00000001493	Meox1	ensembl_havana	9	0.0001	0.0001	0.094864	0.0001	0.0001	0.0001	0.0001	0.0320371	0.0001	0.0001	0.0001	0.0001	0.101915	0.0371817	0.0328881	0.0001	0.0001	0.0001	0.0001	0.0311954
11	101962458	101967016	-	ENSMUSG00000001494	protein_coding	ENSMUSG00000001494	Sost	ensembl_havana	6	0.744715	0.25893	0.284392	0.264083	0.0338501	0.096492	0.0001	0.0320371	0.0633689	0.283295	0.0898489	0.0331952	0.0679767	0.185508	1.3772	1.32831	0.0001	0.033107	0.329751	0.466531
12	56531958	56536909	-	ENSMUSG00000001496	protein_coding	ENSMUSG00000001496	Nkx2-1	ensembl_havana	15	0.0001	0.0324538	0.0001	0.0660957	0.0001	0.0001	0.0001	0.0959114	0.0001	0.0354994	0.0001	0.0331952	0.0001	0.0001	0.0001	0.0001	0.0001	0.0001	0.0001	0.0001
12	56691767	56712823	+	ENSMUSG00000001497	protein_coding	ENSMUSG00000001497	Pax9	ensembl_havana	18	0.0001	0.0324538	0.0001	0.0001	0.0001	0.0322307	0.0001	0.0001	0.0633689	0.177097	0.149681	0.0993855	0.237668	0.0371817	0.0001	0.0001	0.0001	0.0001	0.0330651	0.0001
13	72628820	72634199	+	ENSMUSG00000001504	protein_coding	ENSMUSG00000001504	Irx2	ensembl_havana	10	0.0355578	0.0001	0.094864	0.0330979	0.0001	0.0001	0.0001	0.0001	0.0001	0.0001	0.0001	0.0662903	0.0001	0.0371817	0.0001	0.0001	0.0001	0.0001	0.0330651	0.0622908
11	94936224	94953043	+	ENSMUSG00000001506	protein_coding	ENSMUSG00000001506	Col1a1	ensembl_havana	10	278.805	592.818	1778.88	836.1	1727.94	430.84	1803.3	661.099	2092.68	1414.28	890.788	549.115	145.867	251.748	1570.19	1059.17	1118.05	787.052	1491.57	533.722
11	95044474	95076802	-	ENSMUSG00000001507	protein_coding	ENSMUSG00000001507	Itga3	ensembl_havana	16	611.967	303.705	570.574	508.497	719.891	642.196	541.614	343.931	627.311	520.3	521.262	337.902	294.517	192.343	697.632	476.974	828.502	655.387	761.692	486.177
11	94962791	94976328	-	ENSMUSG00000001508	protein_coding	ENSMUSG00000001508	Sgca	ensembl_havana	15	0.0001	0.0001	0.0001	0.0001	0.0001	0.0001	0.0001	0.0001	0.0001	0.0001	0.0001	0.0001	0.0001	0.0001	0.0656761	0.0001	0.0001	0.0001	0.0001	0.0001
11	95120119	95125297	+	ENSMUSG00000001510	protein_coding	ENSMUSG00000001510	Dlx3	ensembl_havana	8	0.922004	0.161869	0.221216	0.0990936	0.371352	0.0322307	0.0924836	0.0959114	0.442982	0.354094	0.0898489	0.0662903	1.25582	0.185508	0.196828	0.0738893	0.0312514	0.099121	0.0660302	0.0933862
6	128362967	128376147	+	ENSMUSG00000001517	protein_coding	ENSMUSG00000001517	Foxm1	ensembl_havana	14	262.424	276.301	248.913	237.981	177.762	243.165	187.046	211.775	218.246	238.84	256.233	291.469	192.498	228.015	214.762	242.656	172.89	148.631	207.12	275.754
6	128409444	128424932	-	ENSMUSG00000001518	protein_coding	ENSMUSG00000001518	Itfg2	ensembl_havana	12	42.5141	47.366	40.338	30.0611	35.1678	33.6731	40.3717	32.0331	40.5555	36.7446	42.4214	39.2179	44.3575	47.9467	38.4933	31.7664	42.4906	37.298	40.5472	39.1803
6	128399296	128416428	+	ENSMUSG00000001520	protein_coding	ENSMUSG00000001520	Nrip2	ensembl_havana	12	0.0001	0.0324538	0.0001	0.0330979	0.0338501	0.128623	0.154073	0.0639743	0.316445	0.106298	0.149681	0.0001	1.28976	0.0742633	0.16404	0.0738893	0.124706	0.165135	0.0660302	0.0001
6	128321161	128355852	-	ENSMUSG00000001521	protein_coding	ENSMUSG00000001521	Tulp3	ensembl_havana	12	93.0415	115.277	88.6676	101.139	117.079	119.976	122.839	121.425	117.269	114.729	131.961	121.658	126.488	125.447	107.873	114.779	96.1021	105.094	111.554	119.966
17	35667730	35673740	-	ENSMUSG00000001524	protein_coding	ENSMUSG00000001524	Gtf2h4	ensembl_havana	14	44.9961	46.9131	31.9356	30.6221	31.7252	28.9177	30.2711	31.2346	29.3569	39.2226	41.9128	37.0667	52.7063	52.2482	31.5422	33.4267	39.6558	38.4203	28.8775	25.9959
17	35833921	35838307	-	ENSMUSG00000001525	protein_coding	ENSMUSG00000001525	Tubb5	ensembl_havana	10	2189.98	2221.83	2373.68	2567.89	2251.34	2286.32	1903.13	2316.59	2094.36	2482.34	2225.17	2542.97	1783.87	2185.82	2236.8	2470.39	2678.68	2096.37	2350.64	2106.84
13	75706757	75772365	+	ENSMUSG00000001542	protein_coding	ENSMUSG00000001542	Ell2	ensembl_havana	7	12.7295	62.637	23.4384	36.9907	14.3439	30.9741	17.3374	45.3189	18.095	30.1604	15.5566	54.4085	22.0261	43.3115	17.0499	36.3782	11.7442	8.71395	20.3396	37.6255
11	100368958	100397764	-	ENSMUSG00000001552	protein_coding	ENSMUSG00000001552	Jup	ensembl_havana	14	119.138	111.556	196.004	177.199	300.106	319.604	267.943	215.64	314.067	241.636	252.763	172.856	173.052	105.052	322.602	210.927	212.702	301.651	273.94	172.206
11	100415697	100424825	+	ENSMUSG00000001555	protein_coding	ENSMUSG00000001555	Fkbp10	ensembl_havana	10	288.024	315.805	345.415	342.782	434.635	408.638	421.423	456.989	378.127	380.083	383.347	348.757	276.632	241.216	359.554	305.857	410.077	466.422	351.309	337.758
11	100441917	100457023	+	ENSMUSG00000001558	protein_coding	ENSMUSG00000001558	Klhl10	ensembl_havana	5	0.0710157	0.0648075	0.15804	0.231085	0.135101	0.192884	0.184867	0.0959114	0.28481	0.212496	0.56851	0.331052	0.712805	0.44508	0.196828	0.0369947	0.21816	0.264156	0.296786	0.0622908
5	29473034	29478471	-	ENSMUSG00000001566	protein_coding	ENSMUSG00000001566	Mnx1	ensembl_havana	9	0.0001	0.0001	0.0001	0.0001	0.0001	0.0001	0.0001	0.0001	0.0001	0.0001	0.0001	0.0001	0.0001	0.0001	0.0001	0.0001	0.0001	0.0001	0.0001	0.0001
5	29434664	29457844	+	ENSMUSG00000001569	protein_coding	ENSMUSG00000001569	Nom1	ensembl_havana	10	118.607	106.315	112.832	101.567	91.733	80.6802	86.6867	83.1325	92.5625	110.057	102.553	102.628	83.8278	87.8837	103.02	102.862	104.638	89.6801	105.093	103.765
17	26561489	26656935	+	ENSMUSG00000001576	protein_coding	ENSMUSG00000001576	Ergic1	ensembl_havana	15	398.972	339.132	272.162	241.379	331.19	314.945	378.003	358.143	310.429	322.24	307.57	323.241	289.189	338.927	288.437	264.645	317.464	322.974	407.449	380.266
11	69851005	69858731	-	ENSMUSG00000001583	protein_coding	ENSMUSG00000001583	Tnk1	ensembl_havana	13	0.0001	0.0001	0.0001	0.0001	0.0001	0.0001	0.0616891	0.0001	0.0317345	0.0001	0.0300163	0.0001	0.0679767	0.0371817	0.0001	0.0001	0.0312514	0.0001	0.0001	0.0001
11	69881567	69895540	-	ENSMUSG00000001588	protein_coding	ENSMUSG00000001588	Acap1	ensembl_havana	12	0.212847	0.161869	0.094864	0.132091	0.202601	0.128623	0.246456	0.159786	0.316445	0.177097	0.897589	0.364147	2.37578	0.370917	0.295193	0.0738893	0.0312514	0.066114	0.197891	0.155577
4	136247729	136274899	+	ENSMUSG00000001604	protein_coding	ENSMUSG00000001604	Tcea3	ensembl_havana	14	0.390136	1.87662	1.80062	3.0029	0.810104	4.27348	1.81698	2.42732	2.7523	4.88521	1.40617	2.41605	0.712805	0.370917	1.11489	6.1984	1.52652	6.66751	1.68132	4.01141
5	87925579	87932666	+	ENSMUSG00000001622	protein_coding	ENSMUSG00000001622	Csn3	ensembl_havana	15	0.106474	0.0324538	0.063276	0.0660957	0.0338501	0.0001	0.0001	0.0001	0.253176	0.177097	0.0001	0.0662903	0.271607	0.0001	0.426345	0.0369947	0.0624028	0.0001	0.0001	0.0622908
12	40201567	40248505	-	ENSMUSG00000001627	protein_coding	ENSMUSG00000001627	Ifrd1	ensembl_havana	12	212.393	164.131	225.317	144.135	122.716	92.665	94.7241	96.099	145.93	147.969	159.723	170.539	81.6557	107.611	217.713	155.991	151.489	95.3903	123.949	118.194
6	146724995	146778813	+	ENSMUSG00000001630	protein_coding	ENSMUSG00000001630	Stk38l	ensembl_havana	13	11.4175	11.4857	11.4665	10.5594	23.9965	18.5395	16.0748	12.264	20.4043	14.0536	16.6635	15.0915	8.68832	10.1234	12.8858	12.4705	19.0647	21.0586	15.3618	10.4171
6	113307137	113324861	+	ENSMUSG00000001632	protein_coding	ENSMUSG00000001632	Brpf1	ensembl_havana	16	77.8655	80.2374	72.8736	73.1893	66.5216	77.3065	63.2213	71.5074	79.5924	78.7637	77.603	87.9339	70.3203	73.5701	67.1501	81.648	68.0036	65.354	69.7543	75.3132
6	34302434	34317479	-	ENSMUSG00000001642	protein_coding	ENSMUSG00000001642	Akr1b3	ensembl_havana	18	107.863	114.306	89.5205	88.9293	86.6705	94.5286	108.027	101.464	276.707	155.793	343.409	193.574	81.4182	95.0775	104.561	101.608	106.102	99.6482	99.3899	123.262
15	102921103	102928815	+	ENSMUSG00000001655	protein_coding	ENSMUSG00000001655	Hoxc13	ensembl_havana	6	0.709257	0.0001	0.726624	0.0330979	6.61513	1.22107	1.41665	0.766592	3.25845	0.460292	1.37625	0.860574	0.135853	0.0371817	5.04946	0.47973	6.85341	5.24821	2.40655	4.78879
15	102954427	102957709	+	ENSMUSG00000001656	protein_coding	ENSMUSG00000001656	Hoxc11	ensembl_havana	3	0.283763	0.0001	0.221216	0.330079	0.405102	0.0001	0.0308945	1.21371	0.0633689	0.0354994	0.0300163	0.0993855	0.0001	0.0001	0.0328881	0.0001	1.27731	0.495205	0.527542	0.74639
15	102990607	102994112	+	ENSMUSG00000001657	protein_coding	ENSMUSG00000001657	Hoxc8	ensembl_havana	7	33.295	49.0808	41.791	26.0024	20.5539	11.278	27.0993	25.9331	63.9017	39.6828	30.3651	21.6443	35.7711	38.3796	0.918166	0.737993	10.5293	5.31423	15.9552	8.92448
15	102998257	103011882	+	ENSMUSG00000001661	protein_coding	ENSMUSG00000001661	Hoxc6	ensembl_havana	5	31.2739	41.4129	44.5708	40.4225	24.199	17.8326	33.0734	28.3603	47.5783	34.2313	31.7114	22.8689	35.4996	34.1152	11.9677	11.4005	18.1925	17.6919	33.2619	30.7845
10	75783813	75798585	-	ENSMUSG00000001663	protein_coding	ENSMUSG00000001663	Gstt1	ensembl_havana	10	0.212847	3.68843	0.221216	0.759051	0.911354	1.76729	1.29347	3.57706	2.30942	8.21275	0.987338	1.72105	1.49339	1.48337	0.459133	1.51278	0.436219	2.90472	1.08795	4.91317
10	75774115	75781415	-	ENSMUSG00000001665	protein_coding	ENSMUSG00000001665	Gstt3	ensembl_havana	11	0.425594	1.61779	0.252804	0.660057	1.0801	1.79942	2.64843	2.33151	1.99307	4.07103	3.50031	1.32391	7.94167	4.11617	0.623073	1.14383	1.46422	4.58807	0.956088	2.79869
10	75771230	75773415	-	ENSMUSG00000001666	protein_coding	ENSMUSG00000001666	Ddt	ensembl_havana	8	6.16977	9.83565	4.2013	6.96265	5.02887	6.97246	6.99046	8.0802	7.78218	8.74374	9.63315	7.21484	15.5778	13.4607	6.39377	8.85482	4.73511	7.19563	6.13161	8.92448
8	109990437	109999804	+	ENSMUSG00000001670	protein_coding	ENSMUSG00000001670	Tat	ensembl_havana	13	0.0001	0.0324538	0.031688	0.0990936	0.0001	0.0001	0.0308945	0.0001	0.0001	0.0001	0.0001	0.0001	0.0340383	0.0001	0.0001	0.0369947	0.0001	0.0001	0.0001	0.0001
8	109947914	109962204	-	ENSMUSG00000001672	protein_coding	ENSMUSG00000001672	Marveld3	ensembl_havana	14	0.106474	0.614822	0.031688	0.132091	1.28261	1.6709	0.400429	0.255597	0.56952	0.424892	0.0898489	0.165576	1.18794	0.927142	0.754226	1.03315	1.1527	2.3766	0.0001	0.0933862
1	121553835	121567990	-	ENSMUSG00000001674	protein_coding	ENSMUSG00000001674	Ddx18	ensembl_havana	11	135.272	116.182	90.9735	76.4561	89.8767	67.8601	80.497	66.4294	87.9439	90.3039	107.848	103.224	111.08	98.8969	101.971	93.6018	116.288	89.9772	93.5881	87.7824
5	148504635	148552790	-	ENSMUSG00000001687	protein_coding	ENSMUSG00000001687	Ubl3	ensembl_havana	15	63.8242	47.1719	61.2492	43.9532	34.7628	37.2717	41.8807	38.165	54.3481	45.2405	43.0496	34.2536	59.1207	45.4993	37.6736	36.0462	30.2481	33.9973	52.9421	44.3421
18	56400337	56503793	+	ENSMUSG00000001700	protein_coding	ENSMUSG00000001700	Gramd3	ensembl_havana	10	9.71555	12.4887	8.87633	15.8391	8.64014	24.1945	12.7182	22.388	14.1723	21.7707	8.97499	8.04222	4.24239	6.63772	9.01682	14.6473	8.34867	16.0745	13.2191	16.605
13	38644207	38659059	-	ENSMUSG00000001707	protein_coding	ENSMUSG00000001707	Eef1e1	ensembl_havana	8	107.757	91.1083	94.1323	76.2251	65.7791	58.1888	67.6249	58.0618	58.8718	51.0106	81.163	85.0547	73.1712	75.2759	95.2822	88.8793	77.0686	44.1305	80.369	86.0722
12	112653821	112674885	-	ENSMUSG00000001729	protein_coding	ENSMUSG00000001729	Akt1	ensembl_havana	14	304.158	285.199	437.304	431.216	355.254	397.714	580.385	499.657	350.035	343.409	428.641	429.244	357.133	340.41	495.559	509.441	319.302	278.645	283.665	263.596
5	136966616	136975859	+	ENSMUSG00000001739	protein_coding	ENSMUSG00000001739	Cldn15	ensembl_havana	14	9.32551	4.10903	16.5522	39.4655	54.6416	37.4966	46.5922	15.6812	33.1846	14.3014	14.3599	4.93128	18.1911	4.4499	49.838	4.72262	70.3088	61.0631	9.98853	2.58102
7	83642825	83745727	-	ENSMUSG00000001741	protein_coding	ENSMUSG00000001741	Il16	ensembl_havana	12	4.25504	0.938359	14.2463	3.23389	10.5301	8.12916	26.9761	22.1645	31.6978	58.9754	6.58168	5.36152	18.5983	7.00854	1.21326	0.996256	3.48906	4.29101	28.3171	7.77395
19	3896050	3907134	-	ENSMUSG00000001750	protein_coding	ENSMUSG00000001750	Tcirg1	ensembl_havana	16	61.1294	79.1698	34.2731	35.1428	53.6291	51.5056	49.5177	52.377	51.3745	48.0016	66.7733	49.9407	111.352	112.061	33.5751	45.2698	45.1385	50.7979	56.5023	60.3874
11	101070012	101077673	+	ENSMUSG00000001751	protein_coding	ENSMUSG00000001751	Naglu	ensembl_havana	9	7.76537	17.8594	13.3618	28.1803	25.8865	39.2317	18.754	24.3681	19.1073	22.0893	19.5953	20.486	34.1421	26.6247	16.8204	21.9155	15.9496	35.3836	14.6036	23.6326
11	101082565	101086620	+	ENSMUSG00000001755	protein_coding	ENSMUSG00000001755	Coasy	ensembl_havana	12	24.076	33.648	20.6902	34.8128	34.6278	40.8061	30.7638	30.2765	30.4008	39.1518	35.5107	32.8967	51.6882	48.8737	25.8043	36.2675	25.2016	56.9372	22.5482	28.4524
6	29735503	29761366	+	ENSMUSG00000001761	protein_coding	ENSMUSG00000001761	Smo	ensembl_havana	7	155.341	169.89	141.104	212.869	206.754	262.572	186.091	233.748	204.77	291.478	205.615	265.159	193.245	177.51	139.153	181.337	194.416	284.322	141.322	170.527
6	29694222	29718560	+	ENSMUSG00000001763	protein_coding	ENSMUSG00000001763	Tspan33	ensembl_havana	14	1.77299	3.009	1.73744	3.33288	4.55637	4.69118	3.32591	4.27968	3.19518	4.07103	4.2183	5.52699	1.96852	3.11496	2.39363	2.98857	4.57935	6.53549	2.7362	5.69056
2	145917479	145935015	-	ENSMUSG00000001767	protein_coding	ENSMUSG00000001767	Crnkl1	ensembl_havana	5	65.6326	63.5753	65.9242	59.8912	64.1591	54.3973	59.4335	61.4472	70.45	79.2593	65.098	59.0419	33.8706	45.351	61.9695	61.9462	75.5734	78.9859	58.1506	56.5626
2	145675215	145887617	+	ENSMUSG00000001768	protein_coding	ENSMUSG00000001768	Rin2	ensembl_havana	16	21.2748	67.2636	34.052	56.1954	133.651	84.2146	62.2974	59.0199	75.6381	75.1529	64.9185	39.6812	48.5998	53.4719	38.4933	44.3844	83.8285	137.21	67.5786	34.858
7	86718977	86775944	-	ENSMUSG00000001773	protein_coding	ENSMUSG00000001773	Folh1	ensembl_havana	14	0.0001	0.0001	0.0001	0.0001	0.0001	0.0001	0.0001	0.0320371	0.0633689	0.0001	0.0001	0.0001	0.0001	0.0001	0.0001	0.0001	0.0001	0.0001	0.0001	0.0311954
9	18292125	18317443	+	ENSMUSG00000001774	protein_coding	ENSMUSG00000001774	Chordc1	ensembl_havana	8	82.0141	86.9023	110.116	82.5277	93.6905	80.9052	97.1568	80.0027	110.468	107.26	116.285	104.448	65.6369	80.2448	98.7578	95.7417	113.516	94.0371	90.0608	88.1245
10	85938637	85957824	-	ENSMUSG00000001783	protein_coding	ENSMUSG00000001783	Rtcb	ensembl_havana	3	298.768	249.512	239.342	230.589	165.612	193.555	221.012	221.867	243.712	241.459	263.772	255.429	343.185	330.064	232.763	225.537	176.223	163.682	243.711	246.12
10	85829494	85889097	+	ENSMUSG00000001785	protein_coding	ENSMUSG00000001785	Pwp1	ensembl_havana	13	164.915	128.509	124.867	104.141	79.7854	76.5033	96.6641	95.2367	104.331	105.207	131.632	127.714	136.33	147.808	118.267	114.706	100.868	73.4407	108.455	113.063
10	86021972	86051874	+	ENSMUSG00000001786	protein_coding	ENSMUSG00000001786	Fbxo7	ensembl_havana	14	18.8637	14.5916	16.6786	18.0499	16.6052	15.6156	22.5109	18.0127	17.9368	17.983	22.198	16.2829	28.678	22.3974	22.132	17.3037	18.0368	15.8765	18.9221	22.0467
7	30186936	30198812	-	ENSMUSG00000001794	protein_coding	ENSMUSG00000001794	Capns1	ensembl_havana	13	214.166	237.962	269.256	377.166	361.059	312.471	343.205	318.318	315.491	265.814	264.4	276.973	293.058	235.061	411.261	286.266	344.441	298.482	339.211	356.695
7	35200027	35215499	-	ENSMUSG00000001802	protein_coding	ENSMUSG00000001802	Lrp3	ensembl_havana	16	0.106474	0.0001	0.47392	0.990036	0.0001	0.0643614	0.154073	0.255597	0.822596	0.920483	0.209514	0.728193	0.0340383	0.148427	0.491921	0.295257	0.155857	0.132128	0.230856	0.279959
18	20436175	20471822	+	ENSMUSG00000001804	protein_coding	ENSMUSG00000001804	Dsg4	ensembl_havana	9	0.0001	0.0324538	0.189628	0.165089	0.135101	0.225015	0.246456	0.319471	0.158272	0.318694	0.23943	0.264861	0.0001	0.0001	0.918166	0.295257	0.124706	0.165135	0.461612	1.02625
2	74652991	74659558	-	ENSMUSG00000001815	protein_coding	ENSMUSG00000001815	Evx2	ensembl_havana	15	0.0001	0.0001	0.0001	0.0001	0.0001	0.0001	0.0001	0.0639743	0.0001	0.0001	0.0001	0.0001	0.0001	0.0001	0.0001	0.0001	0.0001	0.0001	0.0001	0.0311954
2	74668310	74671600	+	ENSMUSG00000001819	protein_coding	ENSMUSG00000001819	Hoxd13	ensembl_havana	4	0.0001	0.0648075	0.63186	2.70592	0.0001	0.417799	0.123278	7.09015	0.0317345	0.955883	0.56851	9.39913	0.0001	0.0001	0.0001	0.0001	0.0001	0.066114	0.230856	0.186672
2	74675013	74677706	+	ENSMUSG00000001823	protein_coding	ENSMUSG00000001823	Hoxd12	ensembl_havana	5	0.0001	0.0001	0.0001	0.0001	0.0001	0.0001	0.0001	0.0001	0.0001	0.0001	0.0001	0.0001	0.0340383	0.0001	0.0001	0.0001	0.0001	0.0001	0.0001	0.0001
7	101858331	101870789	-	ENSMUSG00000001827	protein_coding	ENSMUSG00000001827	Folr1	ensembl_havana	12	16.5589	6.40615	22.396	16.631	88.0205	60.7592	161.61	30.6917	109.202	26.1602	86.7873	38.6552	15.5439	4.37574	118.955	36.7103	77.754	51.359	71.007	21.8602
7	101663633	101795507	+	ENSMUSG00000001829	protein_coding	ENSMUSG00000001829	Clpb	ensembl_havana	17	79.0356	71.4696	60.7438	59.2972	55.0128	57.6104	85.7013	70.3576	58.1126	52.0372	57.7984	58.0821	61.0891	57.9217	71.183	65.525	50.4653	53.4054	68.7983	74.1937
9	25252439	25308572	+	ENSMUSG00000001833	protein_coding	ENSMUSG00000001833	2022-09-07	ensembl_havana	17	307.384	292.543	384.868	327.702	309.05	298.301	323.096	353.417	311.188	358.56	357.619	372.585	216.493	272.884	327.291	349.983	357.93	330.4	368.748	435.584
5	143316489	143329257	-	ENSMUSG00000001844	protein_coding	ENSMUSG00000001844	Zdhhc4	ensembl_havana	10	28.1182	30.3803	20.248	24.4845	22.4439	26.8292	19.6162	24.0168	22.3657	24.992	23.5442	26.2115	29.4586	27.7001	23.0829	28.1507	20.9338	30.0035	25.4821	25.9026
5	143503634	143528037	-	ENSMUSG00000001847	protein_coding	ENSMUSG00000001847	Rac1	ensembl_havana	14	369.294	358.933	396.935	396.403	342.935	350.867	355.708	364.882	254.341	233.494	329.468	328.503	273.272	278.966	363.849	369.168	338.304	318.419	387.67	390.776
2	31974436	32053976	+	ENSMUSG00000001855	protein_coding	ENSMUSG00000001855	Nup214	ensembl_havana	15	152.469	160.766	133.396	114.866	123.728	114.707	110.091	120.531	122.932	137.739	124.392	127.913	123.909	131.863	139.022	129.795	127.067	118.66	117.059	129.606
2	31950139	31973443	+	ENSMUSG00000001864	protein_coding	ENSMUSG00000001864	Aif1l	ensembl_havana	13	263.948	147.21	464.344	242.765	422.788	185.362	246.541	155.087	338.52	216.892	379.937	229.118	54.3354	76.2029	400.703	266.49	450.854	165.959	423.239	265.462
3	20215620	20242182	-	ENSMUSG00000001865	protein_coding	ENSMUSG00000001865	Cpa3	ensembl_havana	2	0.0001	0.0001	0.0001	0.0001	0.0001	0.0001	0.0001	0.0001	0.0001	0.0001	0.0001	0.0001	0.0001	0.0001	0.0001	0.0001	0.0001	0.0001	0.0001	0.0622908
17	75005568	75392513	+	ENSMUSG00000001870	protein_coding	ENSMUSG00000001870	Ltbp1	ensembl_havana	16	136.3	128.509	377.698	166.045	81.0342	97.9987	126.781	263.098	29.0405	137.137	62.9739	204.627	45.0023	77.3154	69.6747	123.007	40.6215	67.7305	414.635	105.289
11	21321138	21371202	-	ENSMUSG00000001891	protein_coding	ENSMUSG00000001891	Ugp2	ensembl_havana	16	78.3974	68.7519	93.5637	109.388	173.003	160.718	166.506	131.262	184.366	189.033	126.456	106.732	127.914	96.2641	102.987	98.804	212.858	241.545	115.477	153.922
11	106008124	106034550	+	ENSMUSG00000001901	protein_coding	ENSMUSG00000001901	Kcnh6	ensembl_havana	15	0.0001	0.0001	0.0001	0.594061	0.0001	0.0643614	0.0616891	0.0320371	0.0317345	0.0001	0.0599326	0.0001	0.0679767	0.0001	0.16404	0.0001	0.0001	0.0001	0.0660302	0.0001
8	84686307	84699809	+	ENSMUSG00000001909	protein_coding	ENSMUSG00000001909	Trmt1	ensembl_havana	16	135.378	143.198	106.957	82.7257	105.436	103.011	107.381	96.9613	108.791	123.438	115.268	120.797	131.274	148.438	144.891	122.601	131.989	118.891	111.95	119.127
8	84670479	84687903	-	ENSMUSG00000001910	protein_coding	ENSMUSG00000001910	Nacc1	ensembl_havana	5	236.929	218.906	202.89	219.535	219.376	225.043	239.92	222.57	198.57	208.856	178.391	184.34	180.858	198.016	264.469	239.299	271.048	236.99	223.372	204.452
8	84699876	84800345	-	ENSMUSG00000001911	protein_coding	ENSMUSG00000001911	Nfix	ensembl_havana	16	176.58	183.834	106.009	68.4377	152.382	122.707	99.9899	93.033	98.4465	106.729	115.268	86.3123	246.426	219.598	104.987	108.507	130.524	138.167	90.0608	42.4453
7	16781340	16798275	+	ENSMUSG00000001918	protein_coding	ENSMUSG00000001918	Slc1a5	ensembl_havana	17	93.4315	86.2876	15.0044	20.7887	50.8278	52.0839	25.8983	20.5357	103.128	72.7458	74.9404	70.923	128.083	90.9985	44.1328	43.0562	55.8234	62.2513	32.4378	35.3867
X	20658326	20683180	+	ENSMUSG00000001924	protein_coding	ENSMUSG00000001924	Uba1	ensembl_havana	15	696.889	838.448	548.431	629.071	446.38	550.27	521.906	693.867	500.299	474.033	566.645	645.223	501.337	637.842	608.022	666.576	383.941	421.368	614.536	790.103
6	125546774	125686680	+	ENSMUSG00000001930	protein_coding	ENSMUSG00000001930	Vwf	ensembl_havana	17	0.106474	0.161869	0.063276	0.0660957	0.10135	0.0001	0.0616891	0.0320371	0.0950034	0.247896	0.0001	0.0331952	0.135853	0.296753	0.0328881	0.664204	0.0001	0.033107	0.0001	0.0933862
9	37555698	37649656	+	ENSMUSG00000001942	protein_coding	ENSMUSG00000001942	Siae	ensembl_havana	8	6.3116	14.6887	11.3718	17.8519	24.8402	29.6246	13.6729	17.2142	18.791	21.2751	16.125	15.7534	28.101	16.0935	19.7385	18.5212	22.8652	40.6647	14.6036	19.2482
9	37539255	37544206	+	ENSMUSG00000001943	protein_coding	ENSMUSG00000001943	Vsig2	ensembl_havana	8	0.0355578	0.0001	0.031688	0.0001	0.202601	0.0322307	0.0001	0.0320371	0.126638	0.212496	0.0898489	0.0001	0.0001	0.0001	0.0328881	0.0001	0.280462	0.726254	0.0660302	0.0311954
9	37528078	37538320	+	ENSMUSG00000001946	protein_coding	ENSMUSG00000001946	Esam	ensembl_havana	14	0.886546	1.03542	0.252804	0.429072	29.734	9.15734	3.17194	1.40533	8.41487	4.70821	0.837756	0.827479	1.12007	0.66757	0.655861	0.405941	60.2157	69.5789	0.593472	0.653103
9	37603290	37613723	-	ENSMUSG00000001948	protein_coding	ENSMUSG00000001948	Spa17	ensembl_havana	10	0.567426	1.03542	0.821388	1.22102	1.21511	1.34959	0.67758	1.18177	1.0124	2.12406	1.04717	0.827479	1.5952	0.815897	0.754226	1.73415	0.90349	2.21157	0.362716	1.67925
X	74313033	74320150	+	ENSMUSG00000001962	protein_coding	ENSMUSG00000001962	Fam50a	ensembl_havana	8	29.4656	38.404	48.5824	47.055	38.2053	36.6291	56.1385	48.1933	53.7154	42.7979	52.9519	55.1697	31.9021	36.8222	47.51	43.7203	32.1795	38.4203	46.9754	44.9019
X	74254687	74261549	+	ENSMUSG00000001964	protein_coding	ENSMUSG00000001964	Emd	ensembl_havana	14	77.8301	71.4049	105.725	79.3929	63.6191	74.4148	76.0934	80.1943	72.8859	65.0641	85.6505	91.0449	66.7568	73.0139	83.6752	89.7279	63.2063	57.1682	95.9286	91.1407
11	106066061	106073613	+	ENSMUSG00000001983	protein_coding	ENSMUSG00000001983	Taco1	ensembl_havana	7	13.6514	14.6887	9.35015	12.6053	11.4752	11.8563	10.2239	11.721	11.0405	14.266	15.5267	15.3893	12.8967	15.0553	10.0332	12.3967	9.65703	12.2127	11.1753	11.1944
4	125490700	125714174	+	ENSMUSG00000001985	protein_coding	ENSMUSG00000001985	Grik3	ensembl_havana	9	0.0001	0.0971613	0.031688	0.0001	0.0676003	0.0322307	0.246456	0.0320371	0.158272	0.0354994	0.0300163	0.0001	0.0001	0.0001	0.0328881	0.0001	0.0001	0.0001	0.13196	0.0311954
X	41400854	41678602	+	ENSMUSG00000001986	protein_coding	ENSMUSG00000001986	Gria3	ensembl_havana	16	0.99292	0.161869	6.60199	0.165089	25.7177	2.21712	32.9502	3.89643	30.9702	3.32764	6.58168	0.893669	0.373422	0.0371817	4.62322	0.0369947	27.0084	6.33744	10.6808	0.217768
7	16455721	16477729	-	ENSMUSG00000001988	protein_coding	ENSMUSG00000001988	Npas1	ensembl_havana	9	0.0710157	0.0324538	0.0001	0.0001	0.0001	0.096492	0.0616891	0.0001	0.158272	0.0001	0.0599326	0.0001	0.0001	0.0001	0.0328881	0.0001	0.0312514	0.0001	0.0989953	0.0622908
8	125418063	125569809	-	ENSMUSG00000001995	protein_coding	ENSMUSG00000001995	Sipa1l2	ensembl_havana	9	56.2717	79.0727	22.2696	12.6383	42.1878	28.243	70.4272	28.2006	34.2919	20.3193	29.4377	20.2543	35.7032	34.1152	17.2466	31.3974	31.2449	41.985	25.8777	11.1633
2	127008717	127067910	+	ENSMUSG00000001998	protein_coding	ENSMUSG00000001998	Ap4e1	ensembl_havana	15	27.5508	31.3509	28.6188	29.6982	28.2827	31.4239	24.451	26.1886	27.3955	28.7798	24.711	26.046	25.4878	25.1786	28.3946	32.947	30.1546	32.578	21.8889	28.3902
2	127070665	127097085	+	ENSMUSG00000001999	protein_coding	ENSMUSG00000001999	Blvra	ensembl_havana	15	33.6496	36.301	29.9139	32.8	33.6152	32.4842	28.0231	29.4142	27.5853	30.1604	32.9379	32.9298	33.1918	38.4538	32.3291	39.2191	38.4098	35.9447	33.3938	40.704
X	73793359	73824970	-	ENSMUSG00000002006	protein_coding	ENSMUSG00000002006	Pdzd4	ensembl_havana	12	0.461052	1.19719	7.80233	8.94252	4.86012	8.93243	7.85271	14.4996	8.00362	9.41633	5.77394	8.8696	1.56126	1.89127	1.9346	4.46435	4.4859	4.39003	6.82388	11.5365
X	73774405	73778926	+	ENSMUSG00000002007	protein_coding	ENSMUSG00000002007	Srpk3	ensembl_havana	5	0.0001	0.0324538	0.189628	0.528066	0.202601	0.0643614	0.277251	0.0639743	0.221541	0.106298	0.149681	0.132481	0.0001	0.0001	0.0328881	0.0001	0.373917	0.0001	0.0001	0.0311954
X	73778963	73786898	-	ENSMUSG00000002010	protein_coding	ENSMUSG00000002010	Idh3g	ensembl_havana	17	119.741	128.186	105.251	130.243	91.868	120.683	104.578	110.758	99.1109	95.189	110.152	110.008	145.019	154.074	124.201	114.005	88.9996	90.0102	96.5879	103.268
X	73655994	73660118	-	ENSMUSG00000002012	protein_coding	ENSMUSG00000002012	Pnck	ensembl_havana	13	0.106474	0.0001	0.189628	0.0660957	0.168851	0.0643614	0.0924836	0.0639743	0.0950034	0.106298	0.179598	0.0331952	0.0679767	0.0371817	0.131252	0.221468	0.0001	0.132128	0.296786	0.0622908
X	73787028	73790831	+	ENSMUSG00000002014	protein_coding	ENSMUSG00000002014	Ssr4	ensembl_havana	12	63.0796	64.74	69.1778	79.9209	60.6829	74.961	90.0741	70.8048	61.7506	46.5857	67.222	67.8783	81.0788	87.2162	77.8062	77.073	62.6144	60.7	65.6996	67.446
X	73686178	73716176	-	ENSMUSG00000002015	protein_coding	ENSMUSG00000002015	Bcap31	ensembl_havana	5	116.231	113.077	127.3	117.868	108.338	110.53	152.649	129.377	119.104	98.4457	126.576	123.544	117.834	117.697	128.857	117.399	104.046	94.6642	132.388	124.444
17	75537086	75551947	-	ENSMUSG00000002017	protein_coding	ENSMUSG00000002017	Fam98a	ensembl_havana	10	118.89	106.379	108.852	78.469	108.102	82.7366	130.076	98.0471	113.947	99.9679	125.379	114.245	89.8009	105.423	106.135	97.1806	124.263	105.623	114.092	87.3471
12	84783212	84876533	-	ENSMUSG00000002020	protein_coding	ENSMUSG00000002020	Ltbp2	ensembl_havana	15	4.5387	28.8273	41.3804	4.71879	8.97764	5.14101	9.94673	11.8168	31.856	28.0718	4.48754	9.69698	4.47996	53.991	10.7546	7.93245	3.3333	4.95115	13.4828	4.13579
9	44803355	44881297	-	ENSMUSG00000002028	protein_coding	ENSMUSG00000002028	Kmt2a	ensembl_havana	13	114.529	126.309	138.134	112.886	100.711	107.799	105.933	101.177	99.7752	89.7375	125.2	117.951	142.304	137.647	130.628	94.8931	116.226	97.7999	133.904	119.717
9	44767908	44793448	+	ENSMUSG00000002031	protein_coding	ENSMUSG00000002031	Ift46	ensembl_havana	12	73.5751	107.803	57.3323	97.2778	83.0592	119.815	64.9766	116.187	66.0528	69.7722	86.159	86.6763	98.3874	141.17	57.1825	81.8693	82.3021	132.523	62.2053	98.4481
9	44793769	44799308	-	ENSMUSG00000002032	protein_coding	ENSMUSG00000002032	Tmem25	ensembl_havana	17	0.283763	0.614822	0.442332	0.792049	0.776353	1.70303	0.985525	1.50115	0.474617	0.955883	0.478761	0.529623	1.5952	1.63169	0.557497	1.10694	0.560825	1.58444	0.626437	1.02625
9	44969572	44980432	-	ENSMUSG00000002033	protein_coding	ENSMUSG00000002033	Cd3g	ensembl_havana	14	0.0001	0.0324538	0.0001	0.0001	0.0001	0.0001	0.0001	0.0320371	0.0001	0.0001	0.0001	0.0001	0.0001	0.0001	0.0001	0.0001	0.0001	0.0001	0.0001	0.0001
7	19508395	19516146	+	ENSMUSG00000002043	protein_coding	ENSMUSG00000002043	Trappc6a	ensembl_havana	17	13.7932	20.2536	9.76079	15.5751	14.0739	21.9132	9.76197	13.3498	13.6029	14.5138	21.6595	16.1836	50.0931	40.4562	19.8697	20.0339	9.12746	15.2493	14.9333	12.1584
11	78206746	78245988	-	ENSMUSG00000002052	protein_coding	ENSMUSG00000002052	Supt6	ensembl_havana	6	282.67	288.046	261.043	265.633	253.025	250.684	241.552	272.648	247.919	267.69	290.368	308.546	316.747	303.996	259.387	277.19	259.148	279.239	270.281	297.49
11	78301529	78322458	+	ENSMUSG00000002055	protein_coding	ENSMUSG00000002055	Spag5	ensembl_havana	9	109.104	131.259	104.019	113.348	111.173	127.527	102.361	114.367	92.9738	121.526	123.375	128.244	138.333	139.798	98.3315	138.097	99.5288	97.8659	86.995	123.822
11	78357577	78386559	-	ENSMUSG00000002057	protein_coding	ENSMUSG00000002057	Foxn1	ensembl_havana	4	0.0355578	0.25893	0.31598	0.198087	0.0676003	0.225015	0.0308945	0.0001	0.189907	0.141697	0.299263	0.198671	0.0001	0.0371817	0.918166	0.332152	0.0624028	0.0001	0.13196	0.373245
11	78343482	78349165	+	ENSMUSG00000002058	protein_coding	ENSMUSG00000002058	Unc119	ensembl_havana	13	18.8282	20.383	13.4566	19.6338	30.7802	24.8692	26.699	19.8331	27.4904	18.4786	20.3133	14.8267	30.4767	21.73	11.9022	16.8979	25.1081	27.759	21.6582	18.1598
11	78188430	78192194	+	ENSMUSG00000002059	protein_coding	ENSMUSG00000002059	Rab34	ensembl_havana	18	117.082	119.741	118.234	113.018	121.737	105.806	114.956	97.2487	106.735	111.26	127.055	118.679	122.959	122.407	99.8398	113.636	108.905	117.703	107.73	105.6
11	78245746	78255497	+	ENSMUSG00000002064	protein_coding	ENSMUSG00000002064	Sdf2	ensembl_havana	10	28.4373	34.9422	34.8732	44.2172	45.0565	49.3528	46.0995	51.2592	42.7383	50.4442	39.1306	45.4398	38.2147	37.9717	34.4604	34.3121	41.7741	53.7355	42.9536	52.1471
7	38097984	38107535	-	ENSMUSG00000002068	protein_coding	ENSMUSG00000002068	Ccne1	ensembl_havana	16	42.975	36.6246	48.1086	51.6417	29.2615	34.155	33.7201	38.7718	37.0124	36.249	31.502	40.7071	23.3836	31.8162	54.9857	59.917	21.5257	23.5341	44.5689	55.381
17	31944769	32036350	-	ENSMUSG00000002076	protein_coding	ENSMUSG00000002076	Hsf2bp	ensembl_havana	12	0.106474	0.161869	0.252804	0.165089	0.371352	0.546322	0.184867	0.0639743	0.442982	0.849685	0.628342	0.529623	0.20373	0.22259	0.196828	0.0369947	0.685431	0.528212	0.527542	0.684199
7	16308393	16318206	+	ENSMUSG00000002083	protein_coding	ENSMUSG00000002083	Bbc3	ensembl_havana	13	18.0836	26.4008	10.0135	17.489	8.80889	13.0773	11.0861	11.2739	13.6029	14.443	7.65867	11.451	21.0758	25.7348	10.6234	18.3367	4.98432	9.07703	12.6917	13.8065
2	91118144	91136517	+	ENSMUSG00000002100	protein_coding	ENSMUSG00000002100	Mybpc3	ensembl_havana	15	0.0710157	0.744237	0.347568	0.495068	9.68639	5.59084	3.20273	0.383346	2.43595	0.354094	2.24382	0.595813	0.0001	0.0742633	6.45935	1.73415	11.9934	6.1064	1.28574	1.21282
2	91054009	91066370	+	ENSMUSG00000002102	protein_coding	ENSMUSG00000002102	Psmc3	ensembl_havana	15	237.922	256.921	287.324	297.311	233.382	249.559	258.828	290.437	296.573	381.074	263.413	281.706	178.075	209.845	257.813	286.856	253.292	293.003	248.129	274.137
2	91202885	91214099	+	ENSMUSG00000002103	protein_coding	ENSMUSG00000002103	Acp2	ensembl_havana	15	27.9409	34.198	41.5383	39.7955	48.7016	48.1961	41.5727	47.81	45.7752	61.3826	39.1605	39.6812	36.959	36.9705	35.0178	41.5435	45.9795	49.2466	40.0857	44.2489
2	91035620	91045730	+	ENSMUSG00000002104	protein_coding	ENSMUSG00000002104	Rapsn	ensembl_havana	11	0.0710157	0.25893	0.031688	0.198087	0.236351	0.48206	0.154073	0.543032	0.411348	1.94706	0.598426	1.42319	0.0001	0.0371817	0.655861	0.627309	0.187008	0.297163	0.494577	0.80858
2	91061791	91070418	-	ENSMUSG00000002105	protein_coding	ENSMUSG00000002105	Slc39a13	ensembl_havana	15	27.9409	31.1568	45.013	24.2535	27.6415	27.022	38.986	34.8435	42.6433	44.6741	33.7158	31.2419	19.2092	22.9166	47.2477	30.4382	19.2205	22.8079	51.9531	40.1132
2	6539694	7509564	-	ENSMUSG00000002107	protein_coding	ENSMUSG00000002107	Celf2	ensembl_havana	18	76.8727	68.4283	109.105	93.219	177.425	151.978	162.534	143.398	162.158	156.217	94.5954	93.7918	56.1681	53.1381	129.185	117.952	215.225	180.548	143.168	145.869
2	91184061	91202835	-	ENSMUSG00000002108	protein_coding	ENSMUSG00000002108	Nr1h3	ensembl_havana	10	0.106474	0.614822	0.221216	0.627059	1.24886	0.899759	0.95473	0.734654	1.04404	1.59307	1.01725	1.29081	0.441298	0.704652	1.80344	1.95552	1.43306	1.91451	0.725332	0.80858
2	91211572	91236983	-	ENSMUSG00000002109	protein_coding	ENSMUSG00000002109	Ddb2	ensembl_havana	14	5.49607	4.82081	5.21212	4.75179	8.16764	7.19737	8.06827	5.14198	6.23209	6.33659	9.66306	4.33557	15.476	9.23344	5.44292	4.20609	6.97801	11.5526	5.53824	3.66936
2	91082390	91115757	+	ENSMUSG00000002111	protein_coding	ENSMUSG00000002111	Spi1	ensembl_havana	8	0.0001	0.0001	0.0001	0.0001	0.0001	0.0001	0.0001	0.0959114	0.0001	0.177097	0.0599326	0.132481	0.0001	0.0371817	0.0656761	0.0001	0.0001	0.066114	0.0330651	0.0311954
11	4160350	4182542	+	ENSMUSG00000002129	protein_coding	ENSMUSG00000002129	Sf3a1	ensembl_havana	11	264.693	242.815	223.611	215.047	206.517	195.965	194.406	207.783	212.331	239.123	252.224	250.828	258.916	252.23	192.991	225.611	218.029	208.637	216.053	218.539
10	127642986	127660958	+	ENSMUSG00000002147	protein_coding	ENSMUSG00000002147	Stat6	ensembl_havana	18	107.154	126.277	111.758	117.406	75.1954	129.005	79.4192	105.68	114.643	109.384	126.845	122.485	163.379	157.338	142.005	158.094	53.9231	65.0239	95.1374	109.549
8	83389867	83428553	+	ENSMUSG00000002190	protein_coding	ENSMUSG00000002190	Clgn	ensembl_havana	13	0.0001	0.0648075	0.252804	0.528066	0.0338501	0.096492	0.0001	0.191723	0.221541	0.672688	0.0898489	0.0993855	0.0001	0.259672	0.0656761	0.0001	0.249311	0.396184	0.0989953	0.373245
7	44572380	44586863	+	ENSMUSG00000002204	protein_coding	ENSMUSG00000002204	Napsa	ensembl_havana	9	0.0001	0.0001	0.0001	0.0001	0.0001	0.0001	0.0001	0.0001	0.0001	0.0001	0.0001	0.0001	0.0340383	0.0001	0.0656761	0.0001	0.0001	0.066114	0.0001	0.0001
7	44748413	44777516	+	ENSMUSG00000002205	protein_coding	ENSMUSG00000002205	Vrk3	ensembl_havana	16	19.821	24.2978	22.0169	30.7211	23.3215	33.0304	25.4672	28.7435	27.3323	25.6292	25.4589	23.0012	26.3023	27.7001	22.296	25.4574	18.6286	28.7162	26.2403	28.5457
7	24399619	24422779	+	ENSMUSG00000002210	protein_coding	ENSMUSG00000002210	Smg9	ensembl_havana	11	36.4508	27.0155	30.3877	29.2362	27.574	27.022	25.2208	18.8111	36.0634	28.8506	35.9595	34.9155	24.4357	23.4357	33.116	33.648	29.6251	28.4191	34.119	29.1987
5	27740080	27791692	-	ENSMUSG00000002221	protein_coding	ENSMUSG00000002221	Paxip1	ensembl_havana	11	112.153	102.756	79.7914	86.4215	77.8954	84.1504	80.5278	77.8629	81.0476	89.6313	77.9021	86.2792	67.3677	85.1396	86.0032	95.5941	83.9531	74.3319	81.2261	98.9768
6	71388634	71440638	-	ENSMUSG00000002222	protein_coding	ENSMUSG00000002222	Rmnd5a	ensembl_havana	14	108.643	147.533	65.3557	167.398	107.967	183.241	95.4016	176.932	112.081	161.067	102.523	148.035	185.575	190.266	78.8882	114.89	86.1337	147.937	84.16	140.489
3	104794836	104818564	-	ENSMUSG00000002227	protein_coding	ENSMUSG00000002227	Mov10	ensembl_havana	15	124.493	144.913	41.3488	61.1451	88.9317	82.1261	67.7481	58.0618	73.2022	62.9402	75.2396	50.6357	99.9825	67.8596	44.3296	57.4082	77.6605	125.196	56.2715	67.9435
3	104781056	104786019	+	ENSMUSG00000002228	protein_coding	ENSMUSG00000002228	Ppm1j	ensembl_havana	7	1.56025	2.03839	1.3268	0.132091	2.09261	0.93189	2.09413	1.05403	2.97374	1.23908	2.09424	0.992955	1.08613	1.26088	1.31162	0.627309	1.68227	1.51842	1.84615	0.653103
3	104788375	104794460	+	ENSMUSG00000002233	protein_coding	ENSMUSG00000002233	Rhoc	ensembl_havana	13	174.169	171.993	191.834	105.164	274.22	146.13	269.452	140.044	327.385	187.935	186.169	110.174	94.4166	72.3464	133.448	116.587	276.593	233.36	221.526	121.21
5	87825686	87846388	+	ENSMUSG00000002240	protein_coding	ENSMUSG00000002240	Prr27	ensembl_havana	12	0.0001	0.0001	0.0001	0.0001	0.0001	0.0001	0.0001	0.0001	0.0001	0.0001	0.0001	0.0001	0.0001	0.0001	0.0001	0.0001	0.0001	0.0001	0.0001	0.0001
17	28331671	28350818	-	ENSMUSG00000002249	protein_coding	ENSMUSG00000002249	Tead3	ensembl_havana	21	29.7492	30.5744	43.2441	23.1976	68.6479	46.7181	69.5649	43.3069	79.3393	68.7811	55.4051	37.8279	34.3118	30.7037	48.8871	47.9263	58.3155	41.5889	51.5246	45.9902
17	28232700	28301475	+	ENSMUSG00000002250	protein_coding	ENSMUSG00000002250	Ppard	ensembl_havana	16	61.3067	63.3488	25.9338	30.9191	29.059	31.3596	34.0588	37.3027	42.0107	36.5322	42.3616	35.2795	75.6147	70.8632	30.8537	34.3121	24.2982	32.2479	25.4821	37.5944
17	28207778	28228609	+	ENSMUSG00000002257	protein_coding	ENSMUSG00000002257	Def6	ensembl_havana	8	0.49651	0.744237	0.505508	0.495068	0.438852	0.48206	0.400429	0.638843	0.664424	1.20368	0.867673	0.926764	2.51154	2.07667	0.590285	0.664204	0.560825	0.726254	0.329751	0.279959
7	6703892	6730432	-	ENSMUSG00000002265	protein_coding	ENSMUSG00000002265	Peg3	ensembl_havana	16	257.885	144.848	404.137	339.746	534.366	383.769	491.265	262.428	632.847	339.445	306.852	144.361	404.647	137.61	425.688	176.024	496.304	511.807	388.725	187.163
7	6671269	6696451	-	ENSMUSG00000002266	protein_coding	ENSMUSG00000002266	Zim1	ensembl_havana	17	0.602883	0.129515	3.00096	0.858044	6.04138	2.8276	7.63714	4.56711	10.4395	5.5224	3.50031	1.12534	8.45075	2.81831	1.21326	0.369047	3.55136	3.96094	1.94504	0.870771
17	25793221	25797137	-	ENSMUSG00000002274	protein_coding	ENSMUSG00000002274	Metrn	ensembl_havana	13	16.8426	21.3536	19.3951	19.6008	17.8202	17.9612	15.1202	16.9268	17.747	16.9564	22.4672	22.5379	22.9764	21.9895	16.6892	16.6027	18.7221	14.6882	19.7792	16.9471
17	25579085	25662827	+	ENSMUSG00000002279	protein_coding	ENSMUSG00000002279	Lmf1	ensembl_havana	19	8.5809	9.93271	7.96027	11.5493	19.7102	16.6759	8.34542	9.198	16.7664	16.3546	19.2363	12.8079	23.4515	19.0972	9.57422	8.3014	19.314	23.171	7.91173	7.24533
17	25773776	25783333	+	ENSMUSG00000002280	protein_coding	ENSMUSG00000002280	Narfl	ensembl_havana	11	24.5369	24.039	27.6396	24.4845	35.3703	34.9904	35.9065	31.1069	34.7031	38.373	30.6643	31.6722	33.5991	28.553	27.3781	27.2284	42.5217	43.4373	32.3389	25.2807
17	33773750	33781831	-	ENSMUSG00000002289	protein_coding	ENSMUSG00000002289	Angptl4	ensembl_havana	16	13.3323	11.7445	30.6089	14.9481	23.8615	16.9008	27.0685	19.9289	19.8033	26.5496	20.044	19.0629	20.431	12.0146	24.46	16.8979	30.84	21.4877	20.5374	10.3238
5	8396973	8422717	-	ENSMUSG00000002297	protein_coding	ENSMUSG00000002297	Dbf4	ensembl_havana	16	158.071	160.216	171.618	152.252	162.507	137.134	141.932	134.04	231.912	288.328	152.663	151.774	86.8823	104.051	144.432	146.029	186.067	159.622	129.685	144.998
17	33909414	33915591	+	ENSMUSG00000002307	protein_coding	ENSMUSG00000002307	Daxx	ensembl_havana	16	71.0931	69.3342	60.0489	56.3604	83.3292	75.8928	91.8602	76.1383	89.494	72.4272	80.2057	77.9061	82.2666	88.032	76.6914	76.741	79.4361	62.3503	60.0296	75.4686
17	33843091	33849775	+	ENSMUSG00000002308	protein_coding	ENSMUSG00000002308	Cd320	ensembl_havana	16	41.2376	33.3892	24.2597	29.6982	34.864	32.9983	33.1966	30.8514	28.5344	30.6205	34.7628	32.0362	45.715	43.089	23.5747	27.3759	38.659	40.7307	23.2735	24.2545
14	55625400	55635958	-	ENSMUSG00000002319	protein_coding	ENSMUSG00000002319	Ipo4	ensembl_havana	16	118.997	136.792	86.5828	89.3583	73.7104	80.873	115.387	101.56	61.7506	66.3739	90.5567	103.72	88.3077	106.869	88.0361	95.1514	72.8943	72.5825	96.5879	116.421
14	55635965	55643807	-	ENSMUSG00000002320	protein_coding	ENSMUSG00000002320	Tm9sf1	ensembl_havana	15	59.8175	62.3458	61.0281	75.0042	57.5779	71.0089	67.5017	66.4294	42.6433	49.1698	60.1917	62.8809	54.2336	60.7399	69.7075	76.5565	53.5493	57.4983	65.5677	74.0382
14	55618037	55625396	+	ENSMUSG00000002324	protein_coding	ENSMUSG00000002324	Rec8	ensembl_havana	8	0.0001	0.0001	0.031688	0.0330979	0.10135	0.128623	0.0616891	0.0320371	0.0001	0.0001	0.0300163	0.0001	0.0679767	0.111345	0.0001	0.0369947	0.0001	0.132128	0.0001	0.0311954
14	55603571	55610031	+	ENSMUSG00000002325	protein_coding	ENSMUSG00000002325	Irf9	ensembl_havana	15	21.6648	17.73	10.0767	13.2982	8.70764	13.7199	15.7669	17.6613	17.9368	22.7265	30.5746	35.7429	14.356	12.7562	9.96767	14.9055	8.72249	11.5195	23.7679	20.7407
14	55671941	55679201	+	ENSMUSG00000002326	protein_coding	ENSMUSG00000002326	Gmpr2	ensembl_havana	6	34.8552	40.3453	37.3371	38.5746	32.3327	37.593	33.8125	37.3027	26.3832	32.3551	36.9766	41.1374	39.1649	38.8246	42.9525	45.1223	33.924	30.7296	37.1518	40.8595
14	55657879	55660509	-	ENSMUSG00000002329	protein_coding	ENSMUSG00000002329	Mdp1	ensembl_havana	7	12.304	13.5887	17.6894	25.3095	14.2427	22.4916	20.3861	25.5818	17.7154	21.2043	21.839	26.5093	16.9014	18.096	22.132	24.7195	16.5103	16.6356	21.0318	27.0531
14	55739020	55745691	-	ENSMUSG00000002332	protein_coding	ENSMUSG00000002332	Dhrs1	ensembl_havana	16	27.2672	37.0128	24.2913	32.173	21.5664	32.8698	39.0476	40.0173	21.2268	29.8418	29.7668	29.6865	38.9274	41.0495	29.9684	32.2829	17.1645	24.4913	33.7234	35.169
8	70093085	70120874	-	ENSMUSG00000002341	protein_coding	ENSMUSG00000002341	Ncan	ensembl_havana	8	0.0001	0.0001	0.031688	0.0001	0.0676003	0.0001	0.0001	0.0639743	0.0001	0.0001	0.0001	0.0001	0.0340383	0.0001	0.0001	0.0001	0.0312514	0.0001	0.0001	0.0311954
8	70172356	70183682	+	ENSMUSG00000002342	protein_coding	ENSMUSG00000002342	Tmem161a	ensembl_havana	17	55.6689	58.6898	50.0987	53.7536	49.4441	53.6905	48.0704	55.5069	24.9281	30.4081	46.7294	48.8816	67.2659	67.8596	66.6255	60.2491	59.032	55.6169	53.7003	67.2905
8	70220172	70234467	-	ENSMUSG00000002343	protein_coding	ENSMUSG00000002343	Armc6	ensembl_havana	11	35.5289	33.3892	29.5349	27.2563	28.9915	24.1945	29.9324	27.1786	19.2022	20.2485	33.5961	41.1705	22.5691	26.4764	41.5754	33.2791	44.1728	28.6172	28.9105	29.1365
8	70139499	70147320	+	ENSMUSG00000002345	protein_coding	ENSMUSG00000002345	Borcs8	ensembl_havana	18	18.58	21.3859	15.4782	22.8676	24.064	25.1263	20.1089	23.2503	11.1038	16.6732	25.0101	23.1667	40.3188	34.5973	27.0175	25.3098	25.2016	30.5316	22.5812	19.6213
8	70184340	70212306	-	ENSMUSG00000002346	protein_coding	ENSMUSG00000002346	Slc25a42	ensembl_havana	16	5.28332	8.02383	2.27444	3.36588	2.43011	4.01644	4.06498	4.59905	2.05634	2.15946	6.04319	6.65223	7.97561	9.93799	4.00024	4.57504	2.39876	3.59786	4.38446	7.21423
17	5841329	5931955	+	ENSMUSG00000002365	protein_coding	ENSMUSG00000002365	Snx9	ensembl_havana	10	100.31	101.397	112.896	83.1877	90.4505	57.7389	101.406	66.7807	102.907	100.817	75.9277	59.4059	50.3646	46.8343	78.0029	73.1253	81.5233	65.288	112.873	91.7315
17	56673294	56711765	+	ENSMUSG00000002372	protein_coding	ENSMUSG00000002372	Ranbp3	ensembl_havana	9	206.187	203.279	200.236	202.871	173.915	171	193.913	203.088	176.236	198.732	198.555	207.838	180.416	210.846	177.252	201.666	194.26	178.337	185.956	218.663
17	56717767	56722142	+	ENSMUSG00000002379	protein_coding	ENSMUSG00000002379	Ndufa11	ensembl_havana	7	46.1662	51.2161	44.476	47.847	47.2503	46.2362	50.6879	61.511	56.9421	65.0641	54.9862	52.7538	46.0544	56.1788	49.4773	51.6526	50.3096	54.8247	55.7111	52.1782
4	123105165	123132100	+	ENSMUSG00000002384	protein_coding	ENSMUSG00000002384	Bmp8b	ensembl_havana	2	1.41841	0.77659	0.537096	0.759051	0.0338501	0.578452	0.369634	0.606906	1.67673	0.885084	0.867673	1.02605	0.339483	0.704652	13.1481	0.516625	0.21816	0.033107	1.18684	1.64816
8	71374123	71381961	-	ENSMUSG00000002393	protein_coding	ENSMUSG00000002393	Nr2f6	ensembl_havana	14	38.791	47.9807	38.2532	53.1926	55.6878	53.2406	52.166	56.4969	43.8771	49.453	39.9982	40.7402	33.1579	41.717	49.1166	49.1438	46.6026	35.6807	44.503	46.3633
8	71366848	71369733	+	ENSMUSG00000002395	protein_coding	ENSMUSG00000002395	Use1	ensembl_havana	14	22.8704	27.2743	29.0926	35.1098	31.0165	41.288	33.3814	31.8095	36.9808	36.957	34.8825	30.3153	51.8918	42.7553	39.6081	41.1376	32.8648	37.1	29.4379	30.3803
8	71371298	71379362	+	ENSMUSG00000002396	protein_coding	ENSMUSG00000002396	Ocel1	ensembl_havana	8	2.83673	3.26783	1.54791	3.0689	3.47637	4.46626	2.58684	2.20376	5.97901	6.15959	5.26537	3.80604	5.29448	3.74535	3.86909	2.91478	3.61366	3.59786	2.50545	2.54992
7	28179469	28187295	+	ENSMUSG00000002409	protein_coding	ENSMUSG00000002409	Dyrk1b	ensembl_havana	18	10.4956	22.6154	8.11821	27.6523	15.8627	30.2672	16.8755	23.1226	13.6978	15.9298	14.8386	12.3777	30.7822	31.8162	11.4103	20.8456	8.16176	21.6197	14.9333	18.9061
6	39603237	39725464	-	ENSMUSG00000002413	protein_coding	ENSMUSG00000002413	Braf	ensembl_havana	15	45.2443	48.9837	51.3938	66.0948	68.8842	117.984	64.3607	74.9885	62.9527	74.5157	53.6699	72.9749	44.086	51.6549	52.8217	65.7095	55.0758	64.8919	58.1835	87.0361
6	39592574	39603383	+	ENSMUSG00000002416	protein_coding	ENSMUSG00000002416	Ndufb2	ensembl_havana	13	20.3529	21.936	18.3527	18.0829	20.2502	24.2909	16.9063	21.4619	16.6082	20.2485	23.634	23.4315	23.9266	22.8795	19.8369	19.2591	19.1582	20.3654	18.8891	19.1549
3	20057811	20118491	+	ENSMUSG00000002428	protein_coding	ENSMUSG00000002428	Hltf	ensembl_havana	12	38.33	41.607	28.7768	44.9762	35.1678	45.8185	34.9827	43.8179	37.044	36.9924	33.7457	29.4548	43.6109	36.4143	32.1652	34.3859	35.6996	32.611	27.46	40.9527
2	181591868	181655661	+	ENSMUSG00000002455	protein_coding	ENSMUSG00000002455	Prpf6	ensembl_havana	14	150.27	160.054	131.975	113.645	145.699	130.29	136.174	142.727	145.455	159.687	154.338	145.685	148.718	147.622	130.988	130.865	129.683	157.972	136.113	137.162
2	181688419	181693978	-	ENSMUSG00000002458	protein_coding	ENSMUSG00000002458	Rgs19	ensembl_havana	13	48.9674	45.2954	51.7096	42.2044	67.6354	52.4374	59.4643	44.265	59.7576	44.0369	51.6655	49.6428	33.056	33.8186	52.7233	48.8117	72.7074	64.1327	55.3156	47.6693
1	4909576	5070286	-	ENSMUSG00000002459	protein_coding	ENSMUSG00000002459	Rgs20	ensembl_havana	17	0.0355578	0.194223	0.031688	0.0001	0.0676003	0.0001	0.0616891	0.0639743	0.0950034	0.0354994	0.0300163	0.0331952	0.0001	0.0371817	0.0656761	0.110784	0.0312514	0.099121	0.197891	0.435436
18	10642092	10706772	-	ENSMUSG00000002475	protein_coding	ENSMUSG00000002475	Abhd3	ensembl_havana	16	0.248305	0.226576	0.252804	0.495068	0.911354	0.96402	0.67758	0.89434	1.61346	1.69927	1.01725	0.926764	0.237668	0.185508	0.524709	0.47973	0.90349	1.8815	0.626437	0.653103
18	10617775	10642080	+	ENSMUSG00000002477	protein_coding	ENSMUSG00000002477	Snrpd1	ensembl_havana	5	137.47	129.9	131.09	117.901	85.523	95.5889	98.2346	92.7775	103.034	101.95	119.755	127.714	101.476	106.091	105.971	120.166	105.323	82.5176	123.026	113.218
5	114707760	114722328	+	ENSMUSG00000002486	protein_coding	ENSMUSG00000002486	Tchp	ensembl_havana	15	19.1119	17.3417	19.5215	20.8547	19.5077	16.0976	16.7215	16.9587	19.9298	19.5759	18.9969	15.3232	14.933	17.7993	13.4104	17.4513	19.2517	24.4913	18.6913	14.6149
16	89787111	90143770	-	ENSMUSG00000002489	protein_coding	ENSMUSG00000002489	Tiam1	ensembl_havana	16	29.0755	46.3307	30.9879	54.3806	33.514	46.8788	38.2469	55.3472	32.4254	38.196	27.194	34.2867	36.1105	54.3618	37.1818	40.2891	30.9334	44.0645	41.2065	45.7725
17	24595816	24632631	-	ENSMUSG00000002496	protein_coding	ENSMUSG00000002496	Tsc2	ensembl_havana	10	144.207	132.456	89.2678	91.3052	123.796	114.321	123.178	115.453	118.882	128.358	138.243	121.592	164.601	165.384	92.528	85.485	117.441	114.501	124.048	109.269
17	24727820	24736144	+	ENSMUSG00000002500	protein_coding	ENSMUSG00000002500	Rpl3l	ensembl_havana	15	0.0355578	0.0324538	0.126452	0.0001	0.0338501	0.0001	0.0616891	0.0001	0.0001	0.141697	0.0599326	0.0001	0.0340383	0.0001	0.0328881	0.0001	0.0001	0.132128	0.164926	0.0001
17	24639286	24650328	-	ENSMUSG00000002504	protein_coding	ENSMUSG00000002504	Slc9a3r2	ensembl_havana	15	42.8686	47.7866	89.4889	119.98	124.909	140.732	96.079	70.7728	107.273	124.252	88.3429	51.6616	58.7134	39.455	74.4618	81.98	94.8561	154.737	82.7425	55.381
15	76070182	76080925	-	ENSMUSG00000002524	protein_coding	ENSMUSG00000002524	Puf60	ensembl_havana	17	238.1	270.931	233.119	276.918	235.036	247.792	214.946	254.795	253.519	294.877	201.367	226.669	205.327	233.133	223.648	254.278	289.552	297.426	219.251	267.731
2	32287384	32307922	+	ENSMUSG00000002546	protein_coding	ENSMUSG00000002546	Golga2	ensembl_havana	16	85.5244	111.426	105.536	109.85	122.142	115.767	134.788	128.1	135.933	139.049	101.865	96.4394	83.3187	83.8788	100.364	97.402	109.31	141.798	112.906	125.346
2	32255002	32260160	-	ENSMUSG00000002550	protein_coding	ENSMUSG00000002550	Uck1	ensembl_havana	16	30.7066	28.4714	33.357	31.81	39.5553	32.8377	38.4009	33.566	38.6574	39.8244	38.4725	30.8779	22.06	22.212	31.2143	30.1061	41.6184	38.3212	37.4814	36.2884
12	40059769	40134229	-	ENSMUSG00000002565	protein_coding	ENSMUSG00000002565	Scin	ensembl_havana	16	0.0710157	0.614822	0.15804	2.44194	0.472602	0.192884	0.0308945	0.89434	0.474617	0.814285	0.0300163	0.132481	0.0340383	0.852978	0.0328881	0.0001	0.124706	0.132128	0.0330651	0.0622908
10	128630843	128669359	-	ENSMUSG00000002578	protein_coding	ENSMUSG00000002578	Ikzf4	ensembl_havana	18	0.461052	0.614822	1.70585	1.78198	3.71262	1.96007	1.81698	3.92837	3.54316	3.96483	1.85491	1.78724	1.12007	1.48337	1.6395	1.66036	4.98432	2.73968	2.14283	5.93932
11	98437708	98438992	-	ENSMUSG00000002580	protein_coding	ENSMUSG00000002580	Mien1	ensembl_havana	7	26.4517	25.1713	21.5431	26.8604	24.874	27.8574	24.8821	29.0629	27.4272	31.0099	32.5789	30.3815	31.0197	31.4454	29.3126	30.6596	30.8088	29.4423	27.9875	28.7633
6	5168090	5193947	-	ENSMUSG00000002588	protein_coding	ENSMUSG00000002588	Pon1	ensembl_havana	13	0.0001	0.0001	0.031688	0.0001	0.0338501	0.0001	0.0308945	0.0001	0.0317345	0.0001	0.0300163	0.0331952	0.0340383	0.0001	0.0328881	0.0001	0.0001	0.0001	0.0001	0.0001
7	25757273	25788706	-	ENSMUSG00000002602	protein_coding	ENSMUSG00000002602	Axl	ensembl_havana	16	605.727	539.079	1189.29	818.743	550.566	672.784	746.152	553.439	612	520.654	750.002	767.278	485.454	492.63	887.245	768.147	494.684	451.338	1166.97	817.498
7	25687002	25705078	+	ENSMUSG00000002603	protein_coding	ENSMUSG00000002603	Tgfb1	ensembl_havana	15	26.9481	40.3453	19.1424	40.3565	14.9852	42.027	18.7848	38.644	22.5555	31.4701	15.8557	27.3698	31.8682	47.5759	13.2793	21.8417	10.8408	12.6748	22.1197	29.6651
7	25711106	25719089	-	ENSMUSG00000002608	protein_coding	ENSMUSG00000002608	Ccdc97	ensembl_havana	8	64.7461	61.6987	59.4803	67.8107	62.8429	71.1053	75.0772	72.6252	69.8173	70.374	65.3074	69.0366	62.1412	69.1945	62.9532	66.8163	56.9137	57.9934	71.1058	76.8368
17	23173869	23193253	-	ENSMUSG00000002617	protein_coding	ENSMUSG00000002617	Zfp40	ensembl_havana	14	5.70881	6.4385	3.00096	4.32282	5.16387	5.81575	3.01796	4.43936	7.46583	8.95614	8.49633	9.69698	7.80592	8.04682	3.21333	3.35751	5.26468	6.73353	5.04376	5.65946
17	32321424	32350608	-	ENSMUSG00000002625	protein_coding	ENSMUSG00000002625	Akap8l	ensembl_havana	10	37.1599	46.4278	32.9148	46.6261	45.7991	74.6075	45.0525	52.7603	61.6557	73.6308	50.6783	52.8862	69.7434	76.4996	31.4111	55.3421	36.7899	50.4678	35.8661	47.1718
5	28456815	28467257	-	ENSMUSG00000002633	protein_coding	ENSMUSG00000002633	Shh	ensembl_havana	4	0.0001	0.0001	0.094864	0.0001	0.0001	0.0001	0.0001	0.0001	0.0001	0.0001	0.0001	0.0001	0.0001	0.0001	0.0001	0.0001	0.0001	0.0001	0.0001	0.0001
7	34184499	34196662	-	ENSMUSG00000002635	protein_coding	ENSMUSG00000002635	Pdcd2l	ensembl_havana	11	19.892	19.2182	19.7742	18.7759	15.3564	16.6438	18.5692	16.7671	21.4483	20.2131	19.2064	20.122	20.4649	19.0601	19.2467	20.5135	14.5789	11.9156	20.1088	21.4559
17	57003405	57011289	-	ENSMUSG00000002658	protein_coding	ENSMUSG00000002658	Gtf2f1	ensembl	9	123.393	124.336	126.352	121.201	113.164	104.007	113.293	121.329	155.167	180.431	150.509	154.952	130.968	145.064	128.234	126.549	136.786	132.688	140.333	136.695
17	56990305	56996189	+	ENSMUSG00000002660	protein_coding	ENSMUSG00000002660	Clpp	ensembl_havana	8	85.9499	87.5818	79.3175	67.1507	72.5629	60.3415	66.9782	58.2215	73.2339	78.2327	89.6592	83.3999	99.3376	104.867	84.0031	76.1138	89.498	80.0091	73.2815	72.2969
17	56997339	56999323	+	ENSMUSG00000002661	protein_coding	ENSMUSG00000002661	Alkbh7	ensembl_havana	14	5.6379	5.53259	9.06585	9.40449	11.3739	11.278	10.0699	8.30376	15.153	13.3457	10.77	9.39913	8.92588	5.6736	10.8857	7.15766	8.50443	11.9486	10.3841	8.64462
17	56999457	57000019	-	ENSMUSG00000002664	protein_coding	ENSMUSG00000002664	Pspn	ensembl_havana	2	0.0710157	0.0324538	0.0001	0.0330979	0.0676003	0.0643614	0.0616891	0.0001	0.0633689	0.0001	0.119765	0.0662903	0.0001	0.0001	0.196828	0.0001	0.0312514	0.066114	0.0660302	0.0311954
17	57065905	57078515	-	ENSMUSG00000002668	protein_coding	ENSMUSG00000002668	Dennd1c	ensembl_havana	8	0.0001	0.0001	0.0001	0.0001	0.0338501	0.0322307	0.0001	0.0001	0.0633689	0.0354994	0.0001	0.0331952	0.0001	0.0001	0.0001	0.0001	0.0312514	0.033107	0.0001	0.0001
12	81573557	81595009	-	ENSMUSG00000002679	protein_coding	ENSMUSG00000002679	Med6	ensembl_havana	14	24.2533	21.2889	37.653	35.4068	29.8352	31.6167	23.0652	25.2943	32.7418	35.6827	33.3269	32.996	34.6172	31.5195	36.8539	37.8171	34.4224	35.0535	25.7459	23.2906
12	50341231	50649099	-	ENSMUSG00000002688	protein_coding	ENSMUSG00000002688	Prkd1	ensembl_havana	8	1.70208	0.679529	19.9637	14.4202	22.4777	11.1816	25.5288	7.09015	37.4869	14.3368	19.9543	6.22199	10.5549	2.07667	23.8698	6.30909	22.3668	11.5856	18.8232	10.8835
11	34046920	34092296	+	ENSMUSG00000002699	protein_coding	ENSMUSG00000002699	Lcp2	ensembl_havana	13	0.0001	0.0001	0.0001	0.0660957	0.0001	0.0001	0.0001	0.0001	0.0001	0.0001	0.0001	0.0001	0.0001	0.0001	0.0001	0.0001	0.0001	0.0001	0.0001	0.0001
2	166906040	166946390	+	ENSMUSG00000002718	protein_coding	ENSMUSG00000002718	Cse1l	ensembl_havana	14	412.871	372.91	390.775	346.94	307.633	281.754	295.936	313.272	297.87	309.567	315.737	338.398	226.674	265.839	329.422	334.303	342.759	282.507	289.796	307.689
2	145902099	145916426	+	ENSMUSG00000002728	protein_coding	ENSMUSG00000002728	Naa20	ensembl_havana	14	65.5971	64.3517	66.9035	48.177	57.4091	48.8066	57.1855	49.4707	58.3024	54.5151	58.7258	55.964	39.3007	48.5029	60.6908	55.0838	70.8072	59.8088	67.216	55.1322
2	76629898	76648016	-	ENSMUSG00000002731	protein_coding	ENSMUSG00000002731	Prkra	ensembl_havana	6	18.5091	22.8419	32.2514	27.8833	26.089	23.4555	28.7622	30.2126	36.3797	36.78	28.4505	21.2472	32.3094	31.0375	28.8208	30.4013	25.4196	26.6037	24.3943	25.0941
2	76663044	76673117	-	ENSMUSG00000002732	protein_coding	ENSMUSG00000002732	Fkbp7	ensembl_havana	14	18.8282	20.2859	16.9313	14.0902	22.984	22.6201	20.7556	19.0346	15.6908	18.4432	13.971	11.9805	21.0079	25.3269	13.4104	17.4513	17.8187	34.1954	17.5046	17.0404
2	76675281	76696829	+	ENSMUSG00000002733	protein_coding	ENSMUSG00000002733	Plekha3	ensembl_havana	8	82.6169	71.0813	72.5893	57.7463	62.0666	50.6381	65.3153	53.2074	68.2673	65.7721	72.1582	70.8568	44.7648	52.3965	70.4944	69.9893	63.362	44.5926	79.2482	93.7838
11	5955693	5967781	+	ENSMUSG00000002741	protein_coding	ENSMUSG00000002741	Ykt6	ensembl_havana	9	123.819	121.489	137.755	152.285	134.899	139.447	159.885	163.135	168.137	197.706	154.009	152.238	104.394	110.318	131.874	136.658	150.804	157.939	160.672	153.642
5	135187264	135246130	+	ENSMUSG00000002748	protein_coding	ENSMUSG00000002748	Baz1b	ensembl_havana	7	386.207	364.336	378.108	354.562	335.274	313.724	315.644	320.521	194.172	194.236	308.467	327.344	307.515	290.238	328.799	329.211	363.506	339.378	324.805	336.452
17	46711463	46725542	+	ENSMUSG00000002763	protein_coding	ENSMUSG00000002763	Pex6	ensembl_havana	16	31.6285	38.5658	26.8183	41.6434	33.2102	40.2277	33.289	43.6262	32.4571	39.081	35.9595	36.7688	77.7189	59.2937	31.3783	35.4559	24.9212	34.9875	28.2842	38.7139
17	46646229	46650140	+	ENSMUSG00000002767	protein_coding	ENSMUSG00000002767	Mrpl2	ensembl_havana	13	72.866	69.1078	54.8684	51.3778	61.6616	58.0602	52.6587	55.6346	62.32	72.675	74.1626	67.8783	89.1901	87.1791	57.0513	53.3867	66.0722	74.2659	56.799	48.9132
17	46678793	46683112	+	ENSMUSG00000002768	protein_coding	ENSMUSG00000002768	Mea1	ensembl_havana	8	39.0037	41.6394	44.4128	46.3951	56.2278	48.6781	43.0509	50.5247	54.9808	62.48	62.2858	55.6993	61.7339	56.1418	45.7722	41.8755	68.1905	60.0728	59.3373	47.4206
17	46725664	46729169	-	ENSMUSG00000002769	protein_coding	ENSMUSG00000002769	Gnmt	ensembl_havana	9	0.212847	0.194223	0.15804	0.0660957	0.168851	0.0001	0.523607	0.159786	0.253176	0.354094	0.149681	0.165576	0.169792	0.148427	0.229616	0.110784	0.155857	0.165135	0.13196	0.186672
7	45831883	45878379	-	ENSMUSG00000002771	protein_coding	ENSMUSG00000002771	Grin2d	ensembl_havana	12	0.567426	1.61779	0.7898	2.90391	1.11385	2.63482	1.60142	2.29957	2.11961	3.36304	1.31642	1.48938	1.52733	2.74414	1.18047	1.32831	0.810036	2.01353	0.791263	2.20787
7	45872772	45883733	+	ENSMUSG00000002778	protein_coding	ENSMUSG00000002778	Kdelr1	ensembl_havana	14	81.3404	100.167	78.5278	105.164	69.4242	99.9587	99.4356	107.98	99.1425	95.5784	79.9963	83.6647	112.37	103.31	80.1997	96.5903	55.8545	79.613	88.3466	94.6234
7	45896941	45917414	+	ENSMUSG00000002781	protein_coding	ENSMUSG00000002781	Tmem143	ensembl_havana	19	14.1123	15.6917	11.435	13.8262	11.5089	16.194	11.2401	11.5613	13.3182	10.8323	14.4497	12.3777	31.427	18.096	15.3777	16.492	9.22091	11.7836	15.5596	12.5315
17	32076083	32107351	-	ENSMUSG00000002791	transcribed_unprocessed_pseudogene	ENSMUSG00000002791	Pdxk-ps	havana	17	0.0355578	0.0324538	0.126452	0.0001	0.0676003	0.128623	0.0924836	0.0639743	0.379713	0.141697	0.149681	0.0331952	0.135853	0.111345	0.131252	0.110784	0.155857	0.099121	0.0989953	0.0311954
6	54982580	54992951	-	ENSMUSG00000002797	protein_coding	ENSMUSG00000002797	Ggct	ensembl_havana	9	12.4458	10.1268	11.0243	8.97552	14.0064	10.9245	12.5951	6.89852	10.5027	6.97377	17.9499	9.16746	12.8627	8.71429	11.2464	7.6004	16.5726	12.2127	11.7027	6.00151
12	112907819	112929777	-	ENSMUSG00000002799	protein_coding	ENSMUSG00000002799	Jag2	ensembl_havana	6	54.7825	27.5979	8.9395	10.5924	25.4815	10.6996	12.8722	6.77078	15.7857	12.8855	19.2961	7.47961	99.5752	61.5557	7.50857	4.24298	36.4161	26.3067	7.28539	1.46158
12	112976482	112978946	+	ENSMUSG00000002803	protein_coding	ENSMUSG00000002803	Btbd6	ensembl_havana	14	5.2124	8.73562	10.6137	15.4101	11.6777	15.1658	7.26761	8.59119	10.8824	10.5845	12.5051	11.2855	15.1027	13.0528	12.5907	14.057	9.40782	11.7176	6.26347	6.71671
12	112934291	112942125	-	ENSMUSG00000002804	protein_coding	ENSMUSG00000002804	Nudt14	ensembl_havana	4	5.49607	5.72672	6.38087	10.4934	13.7364	13.0773	6.34377	6.86659	7.08622	6.54898	10.2016	5.65937	17.3765	11.755	11.312	11.9171	14.1117	14.8863	5.76899	4.19798
13	19591706	19619928	-	ENSMUSG00000002808	protein_coding	ENSMUSG00000002808	Epdr1	ensembl_havana	7	82.6523	55.4221	63.9974	64.5769	54.8441	58.3494	53.0283	59.0199	53.0511	50.4088	57.7385	61.4578	73.8499	72.0127	66.8878	64.4182	48.534	29.8714	66.7215	57.2778
11	60714123	60727264	-	ENSMUSG00000002812	protein_coding	ENSMUSG00000002812	Flii	ensembl_havana	4	117.117	137.989	137.755	147.929	126.901	146.13	137.652	167.926	151.403	160.996	152.513	156.805	125.81	119.069	150.563	142.598	125.447	126.582	163.903	167.324
11	60740058	60777366	-	ENSMUSG00000002814	protein_coding	ENSMUSG00000002814	Top3a	ensembl_havana	15	40.5993	39.7629	31.0195	29.2692	25.4477	26.5722	30.0248	31.3624	31.9825	38.019	33.1474	33.8895	32.1397	41.8282	27.706	29.8479	34.8585	35.2516	31.8114	38.2785
9	21265293	21277773	+	ENSMUSG00000002820	protein_coding	ENSMUSG00000002820	Atg4d	ensembl_havana	6	21.0266	23.133	27.3553	35.3408	31.9615	29.978	27.6844	31.6179	26.8261	34.0189	31.7413	35.5774	16.9014	18.2072	34.6899	31.7295	35.5127	25.4155	25.581	33.9874
9	21411837	21420275	+	ENSMUSG00000002825	protein_coding	ENSMUSG00000002825	Qtrt1	ensembl_havana	8	36.2735	42.9983	36.1052	32.635	28.5527	27.1827	30.4867	29.4781	31.8876	38.1606	41.2547	44.2483	36.4159	43.6081	38.4933	44.0154	31.9614	30.7956	36.5254	35.7909
17	56100591	56109804	-	ENSMUSG00000002831	protein_coding	ENSMUSG00000002831	Plin4	ensembl_havana	14	0.0001	0.0324538	0.0001	0.0330979	0.0001	0.0643614	0.0001	0.0001	0.0633689	0.0001	0.0001	0.0001	0.0679767	0.0371817	0.0328881	0.0001	0.0312514	0.0001	0.0001	0.0311954
17	56079634	56100608	+	ENSMUSG00000002833	protein_coding	ENSMUSG00000002833	Hdgfl2	ensembl_havana	11	154.277	165.91	131.659	138.822	135.541	141.022	139.099	143.653	142.672	162.2	157.39	150.914	170.438	189.191	108.397	146.287	129.964	136.715	128.63	157.001
17	56040439	56072290	+	ENSMUSG00000002835	protein_coding	ENSMUSG00000002835	Chaf1a	ensembl_havana	9	174.914	175.422	145.621	147.534	138.004	132.057	137.528	147.677	140.742	160.855	161.638	176.133	184.693	194.382	119.283	146.214	167.937	151.997	130.344	146.335
16	38444030	38452704	-	ENSMUSG00000002844	protein_coding	ENSMUSG00000002844	Adprh	ensembl_havana	9	46.0598	53.0926	42.328	54.8095	38.4415	57.5462	28.8238	54.5487	38.3727	48.9928	44.1566	50.4371	59.1207	58.8116	46.9526	60.1015	28.5659	33.3042	41.8328	54.8213
16	38558698	38592163	+	ENSMUSG00000002845	protein_coding	ENSMUSG00000002845	Tmem39a	ensembl_havana	14	69.8875	69.4313	58.9433	65.4678	70.7742	52.9836	79.45	60.6807	45.7435	41.8775	47.3875	40.8395	56.7111	55.2147	59.9039	55.5265	59.6239	83.6068	58.4802	64.6474
16	38498347	38522664	-	ENSMUSG00000002846	protein_coding	ENSMUSG00000002846	Timmdc1	ensembl_havana	9	23.7214	24.8478	25.8707	23.1976	32.9402	27.1827	28.0539	23.7933	26.0353	23.6115	24.4118	25.1524	21.4152	22.6199	30.952	24.904	28.0675	31.0267	26.57	24.1612
16	38396117	38433146	-	ENSMUSG00000002847	protein_coding	ENSMUSG00000002847	Pla1a	ensembl_havana	7	0.531968	0.25893	0.031688	2.04597	0.0338501	0.096492	0.0001	0.766592	0.158272	0.495691	0.149681	0.198671	0.135853	0.519243	0.0328881	0.0369947	0.0624028	0.132128	0.230856	1.3683
6	88883474	88898781	-	ENSMUSG00000002870	protein_coding	ENSMUSG00000002870	Mcm2	ensembl_havana	8	378.371	314.867	279.206	232.173	303.886	274.075	234.1	212.702	290.183	298.877	350.17	334.923	301.135	286.419	225.68	224.689	387.71	298.383	239.261	209.925
6	88902251	88912239	+	ENSMUSG00000002871	protein_coding	ENSMUSG00000002871	Tpra1	ensembl_havana	14	21.2039	31.8362	23.2173	37.5517	24.469	33.6731	18.9695	32.065	22.2391	29.8418	25.1597	32.7643	34.4815	37.4897	19.1155	26.8963	16.1677	27.759	23.5042	31.593
1	52457294	52500680	-	ENSMUSG00000002881	protein_coding	ENSMUSG00000002881	Nab1	ensembl_havana	14	183.743	129.803	158.793	149.546	144.721	151.239	148.091	141.737	155.642	130.872	128.969	128.575	185.575	124.372	135.021	122.675	185.974	133.051	155.628	136.913
8	83723251	83741327	-	ENSMUSG00000002885	protein_coding	ENSMUSG00000002885	Adgre5	ensembl_havana	14	24.0051	9.77094	14.9412	9.93245	21.2627	24.6765	11.9484	22.2284	24.1056	24.0363	13.2231	14.0655	6.27869	11.1988	38.1326	20.8456	13.3017	29.9375	22.5482	26.058
6	120463247	120487560	+	ENSMUSG00000002897	protein_coding	ENSMUSG00000002897	Il17ra	ensembl_havana	5	56.9809	66.4224	37.3371	43.1943	33.4127	45.947	34.0896	50.3969	33.849	46.7981	38.5921	58.9757	32.4112	73.8297	42.0672	55.3421	27.1641	24.0952	41.0417	60.3252
12	31265234	31329645	+	ENSMUSG00000002900	protein_coding	ENSMUSG00000002900	Lamb1	ensembl_havana	16	333.978	414.387	454.804	312.952	398.893	190.985	286.05	125.321	301.097	256.929	330.964	236.73	209.23	286.159	364.8	206.721	323.351	290.33	233.063	229.826
8	70842049	70863259	-	ENSMUSG00000002908	protein_coding	ENSMUSG00000002908	Kcnn1	ensembl_havana	17	0.780173	2.00603	0.663448	1.08903	1.04635	1.02828	0.523607	1.53308	1.26548	2.61965	1.73525	2.34986	6.07506	5.52527	0.918166	0.627309	0.90349	2.11255	0.692367	1.27501
8	70835129	70839721	-	ENSMUSG00000002910	protein_coding	ENSMUSG00000002910	Arrdc2	ensembl_havana	11	6.77255	9.93271	1.67426	5.44475	4.89387	5.30166	4.09577	4.66292	4.01768	4.17722	5.44487	3.60747	18.4626	19.0972	5.24619	5.38672	3.89402	5.87535	2.76917	2.45664
6	56017497	56032690	+	ENSMUSG00000002930	protein_coding	ENSMUSG00000002930	Ppp1r17	ensembl_havana	6	0.0001	0.0324538	0.0001	0.0660957	0.0001	0.0001	0.0001	0.0320371	0.0001	0.0001	0.0001	0.0001	0.0001	0.0001	0.0001	0.0001	0.0001	0.0001	0.0001	0.0001
5	17781690	17888802	-	ENSMUSG00000002944	protein_coding	ENSMUSG00000002944	Cd36	ensembl_havana	15	0.106474	0.0971613	0.0001	0.594061	0.641353	0.803367	0.308045	0.351409	0.980768	0.283295	0.0001	0.0662903	0.0001	0.0001	0.131252	0.147679	0.21816	0.759261	0.164926	0.311054
8	4238740	4247898	+	ENSMUSG00000002948	protein_coding	ENSMUSG00000002948	Map2k7	ensembl_havana	19	60.4557	65.8077	50.8884	59.0993	61.0879	63.6831	59.7415	63.4911	64.5344	72.2856	54.8068	54.4747	60.3764	65.9313	73.806	72.6457	61.3683	74.4309	57.1946	69.9647
8	4259731	4275914	-	ENSMUSG00000002949	protein_coding	ENSMUSG00000002949	Timm44	ensembl_havana	15	96.2327	97.3202	75.7797	81.5048	88.5942	95.2354	74.0609	76.777	90.791	99.4369	82.1502	81.5466	97.0638	104.57	107.25	95.9631	90.4326	99.0541	74.765	85.1393
7	141562173	141633012	+	ENSMUSG00000002957	protein_coding	ENSMUSG00000002957	Ap2a2	ensembl_havana	11	287.563	244.53	403.031	384.062	312.931	305.113	337.816	313.112	327.195	262.876	275.828	289.119	205.802	177.065	341.16	270.364	282.294	205.964	336.376	321.558
7	44857139	44862993	+	ENSMUSG00000002963	protein_coding	ENSMUSG00000002963	Pnkp	ensembl_havana	17	23.4732	30.445	38.5059	36.8587	29.059	31.7773	31.1026	36.5362	35.8736	35.1163	32.5789	32.7974	28.8138	31.7049	29.9028	34.349	27.6625	29.6734	31.7125	31.4686
7	44876765	44892713	-	ENSMUSG00000002968	protein_coding	ENSMUSG00000002968	Med25	ensembl_havana	9	128.287	147.727	94.5114	135.621	93.083	130.354	124.164	134.615	118.123	122.588	119.456	122.055	164.567	147.771	98.1676	131.714	75.4176	104.764	108.389	132.498
7	19756131	19771017	-	ENSMUSG00000002980	protein_coding	ENSMUSG00000002980	Bcam	ensembl_havana	14	17.0908	9.25328	52.7836	123.049	278	232.851	153.788	60.1697	360.538	177.528	140.098	69.9964	27.5241	9.3076	139.284	40.8056	304.038	316.273	71.5014	44.8708
7	19631571	19665034	-	ENSMUSG00000002981	protein_coding	ENSMUSG00000002981	Clptm1	ensembl_havana	10	145.448	157.531	160.72	169.906	151.572	186.39	166.876	179.104	182.404	186.873	157.24	177.456	119.293	124.595	171.285	170.343	147.751	156.651	171.155	201.623
7	19606217	19629439	-	ENSMUSG00000002983	protein_coding	ENSMUSG00000002983	Relb	ensembl_havana	17	19.2183	25.3331	17.9105	19.9308	17.0102	23.8732	17.8609	12.743	24.5484	26.2664	11.7572	12.1129	11.3016	12.5337	14.558	30.9178	15.2643	8.77996	22.812	29.6962
7	19701313	19715439	-	ENSMUSG00000002984	protein_coding	ENSMUSG00000002984	Tomm40	ensembl_havana	17	250.829	239.709	199.289	209.338	163.587	155.513	164.689	147.518	171.902	146.589	179.947	182.123	166.502	172.949	211.385	203.695	161.925	134.108	171.979	163.562
7	19696109	19699189	-	ENSMUSG00000002985	protein_coding	ENSMUSG00000002985	Apoe	ensembl_havana	16	9.46735	11.4857	3.4116	6.83066	8.20139	9.92848	17.7685	17.853	44.5731	33.3817	16.7532	7.71127	178.38	31.3341	5.04946	3.91093	11.8688	11.0574	8.83475	5.09975
7	19671579	19677942	-	ENSMUSG00000002992	protein_coding	ENSMUSG00000002992	Apoc2	ensembl_havana	17	0.0001	0.0001	0.0001	0.0001	0.0001	0.0001	0.0001	0.0001	0.0001	0.0001	0.0001	0.0001	0.0001	0.0001	0.0001	0.0001	0.0001	0.0001	0.0001	0.0001
12	31926254	31950536	-	ENSMUSG00000002996	protein_coding	ENSMUSG00000002996	Hbp1	ensembl_havana	17	68.4337	95.6055	37.9689	98.7957	73.0354	111.269	55.5842	86.8691	92.1196	107.296	59.4139	61.4578	115.866	103.866	54.2971	87.1084	36.0111	118.792	46.8435	57.8686
12	31958476	32061297	-	ENSMUSG00000002997	protein_coding	ENSMUSG00000002997	Prkar2b	ensembl_havana	15	53.045	53.2868	17.3419	24.0225	5.77138	13.5271	2.18651	16.0964	5.09325	10.9739	6.76118	12.1129	31.8682	41.717	0.85259	19.6281	3.95633	9.27507	12.0653	8.55133
6	134920401	134925514	+	ENSMUSG00000003031	protein_coding	ENSMUSG00000003031	Cdkn1b	ensembl_havana	14	37.7982	54.9368	79.1596	95.3309	87.5142	117.47	79.3884	81.4079	94.3024	97.8439	82.0904	92.0377	47.378	46.4634	82.8228	99.9846	76.1652	103.246	93.0276	92.4778
4	55527143	55532467	-	ENSMUSG00000003032	protein_coding	ENSMUSG00000003032	Klf4	ensembl_havana	8	7.44625	35.6216	21.2272	34.9118	12.4877	20.0175	5.54312	17.9807	25.3077	50.515	6.25261	32.6319	8.28106	20.0984	15.8695	10.2568	15.7316	36.6049	15.8893	23.5082
8	72240018	72257386	+	ENSMUSG00000003033	protein_coding	ENSMUSG00000003033	Ap1m1	ensembl_havana	15	119.458	114.532	99.5339	123.28	103.039	103.268	93.8618	101.081	103.097	113.915	107.28	104.978	127.065	132.048	157.219	143.815	115.541	115.591	97.6428	104.232
8	72161200	72183905	+	ENSMUSG00000003037	protein_coding	ENSMUSG00000003037	Rab8a	ensembl_havana	16	71.1995	77.0668	91.4157	94.7369	93.5555	94.9784	88.4112	89.7435	93.3217	100.216	86.9369	89.4894	78.4655	90.0344	117.939	92.827	113.329	113.082	86.039	83.5534
4	133964738	133968651	-	ENSMUSG00000003038	protein_coding	ENSMUSG00000003038	Hmgn2	ensembl_havana	15	53.6124	49.5984	113.685	148.556	107.089	120.426	67.1938	82.2383	55.1706	55.3293	56.0034	52.2574	55.1838	44.9802	76.8881	116.624	98.3139	89.5811	132.124	113.498
8	72219730	72224419	+	ENSMUSG00000003039	protein_coding	ENSMUSG00000003039	Fam32a	ensembl_havana	9	90.524	106.509	50.5409	62.2671	96.1543	114.675	71.4434	96.2587	104.647	122.092	91.4542	91.5082	99.7109	119.959	134.267	122.085	104.42	126.483	94.2474	107.808
1	135253575	135258569	-	ENSMUSG00000003051	protein_coding	ENSMUSG00000003051	Elf3	ensembl_havana	13	0.0355578	0.0001	0.094864	0.429072	0.270101	0.096492	0.154073	0.0639743	0.442982	0.354094	0.0300163	0.0662903	0.644928	0.0001	0.721437	0.332152	1.90033	1.51842	0.0989953	0.0001
19	39269405	39330714	+	ENSMUSG00000003053	protein_coding	ENSMUSG00000003053	Cyp2c29	ensembl_havana	17	0.0001	0.0324538	0.0001	0.0001	0.0338501	0.0001	0.0001	0.0320371	0.0001	0.0708987	0.0001	0.0331952	0.0001	0.0001	0.0001	0.0369947	0.0001	0.099121	0.0660302	0.186672
13	19357676	19395796	-	ENSMUSG00000003062	protein_coding	ENSMUSG00000003062	Stard3nl	ensembl_havana	13	32.0185	33.1627	36.5474	39.4985	32.164	38.0107	35.0135	38.676	29.7998	30.4435	31.502	36.5703	29.6961	34.3748	34.985	42.8717	25.2016	26.0426	40.9098	48.0736
10	80115803	80130683	+	ENSMUSG00000003068	protein_coding	ENSMUSG00000003068	Stk11	ensembl_havana	16	141.796	148.051	118.581	120.541	106.279	119.141	128.29	141.482	139.666	155.934	136.329	136.749	155.573	151.627	107.479	122.343	92.7066	104.335	126.092	125.47
10	80179482	80190011	+	ENSMUSG00000003070	protein_coding	ENSMUSG00000003070	Efna2	ensembl_havana	6	3.22676	4.40021	5.02259	7.09464	13.2302	7.48655	14.9047	8.78282	14.1091	11.5049	7.44926	4.20319	13.1682	5.45111	2.81987	2.47204	14.2674	17.3618	5.83493	2.0524
10	80138632	80145819	+	ENSMUSG00000003072	protein_coding	ENSMUSG00000003072	Atp5d	ensembl_havana	15	228.632	251.518	202.005	240.884	185.66	238.474	215.993	242.659	226.092	256.185	250.908	261.22	320.276	324.724	210.631	234.613	152.237	180.482	219.877	225.939
7	17004640	17027925	-	ENSMUSG00000003099	protein_coding	ENSMUSG00000003099	Ppp5c	ensembl_havana	11	159.099	160.701	119.719	137.7	86.3667	93.5325	118.621	106.798	97.8138	91.6136	115.268	122.783	134.023	119.181	120.365	125.257	89.9965	84.9931	117.62	120.122
11	98203059	98278505	+	ENSMUSG00000003119	protein_coding	ENSMUSG00000003119	Cdk12	ensembl_havana	14	143.853	133.33	126.32	106.715	93.488	83.9576	101.345	95.6199	108.854	111.296	104.199	108.056	78.3977	96.0787	113.152	101.313	112.332	96.9747	120.916	136.509
7	25379527	25398711	-	ENSMUSG00000003123	protein_coding	ENSMUSG00000003123	Lipe	ensembl_havana	15	8.29724	9.18857	4.89624	11.7473	8.53889	8.70751	9.91594	8.43151	11.6416	7.50476	7.32959	4.60033	22.06	7.8985	8.09875	7.52661	5.95001	9.34108	5.80196	6.28137
9	45962859	46012691	-	ENSMUSG00000003131	protein_coding	ENSMUSG00000003131	Pafah1b2	ensembl_havana	7	317.029	278.21	291.115	289.226	275.84	272.629	304.404	313.367	228.306	224.184	311.339	295.871	234.887	284.268	284.404	280.473	294.007	301.585	291.675	309.99
1	39371492	39478756	-	ENSMUSG00000003134	protein_coding	ENSMUSG00000003134	Tbc1d8	ensembl_havana	10	0.0710157	0.291284	0.347568	1.22102	5.09637	2.76334	0.585196	0.574969	1.64509	1.41607	0.688175	0.397242	0.40736	0.593407	0.491921	1.3652	3.42675	3.86192	0.527542	0.528722
1	39534992	39546890	+	ENSMUSG00000003135	protein_coding	ENSMUSG00000003135	Cnot11	ensembl_havana	15	56.5908	52.0573	54.363	66.9198	60.1091	62.3336	56.7852	56.2095	62.7312	67.6837	62.944	64.3702	61.2249	60.1095	52.2643	58.9578	56.6022	59.6107	50.7334	57.4644
6	122727809	122801641	-	ENSMUSG00000003153	protein_coding	ENSMUSG00000003153	Slc2a3	ensembl_havana	10	21.0621	8.99445	35.5366	23.9235	72.0904	51.2164	86.9331	25.6776	49.16	29.0276	68.8076	36.2062	76.4632	28.5901	58.9203	39.3298	126.226	65.387	56.3704	21.1139
6	122819914	122845367	+	ENSMUSG00000003154	protein_coding	ENSMUSG00000003154	Foxj2	ensembl_havana	15	46.4499	41.8982	41.4751	45.6361	47.0816	60.47	58.6329	46.7561	54.443	55.1877	49.7509	48.9809	47.7853	39.9	50.5593	51.9109	39.3131	52.5473	54.4255	50.6545
5	8046078	8069380	+	ENSMUSG00000003161	protein_coding	ENSMUSG00000003161	Sri	ensembl_havana	15	94.0698	111.782	120.192	128.362	89.2692	126.081	83.2069	108.842	138.875	220.786	87.9839	110.339	76.0559	76.685	113.709	135.035	94.3576	96.7766	118.213	143.319
16	17839482	17898563	-	ENSMUSG00000003166	protein_coding	ENSMUSG00000003166	Dgcr2	ensembl_havana	20	83.8934	93.4054	55.8477	107.441	85.7255	97.9665	82.4986	98.2707	67.9825	78.1265	65.8758	75.9535	87.9343	94.4842	76.134	96.2213	66.6952	99.7143	64.6117	88.3732
7	44997648	45002849	+	ENSMUSG00000003184	protein_coding	ENSMUSG00000003184	Irf3	ensembl_havana	15	33.2596	39.5688	42.8966	62.894	46.7778	62.3979	46.777	49.4707	55.1706	49.7716	54.4478	51.9926	61.7339	49.2075	50.1986	64.123	35.0143	41.886	43.1185	54.0439
7	44991222	44998713	-	ENSMUSG00000003190	protein_coding	ENSMUSG00000003190	Bcl2l12	ensembl_havana	12	11.7366	14.1063	11.9088	14.9481	13.2302	17.4149	12.2563	13.1582	12.1794	12.9563	15.6164	16.5808	18.3607	15.5002	12.394	19.4436	9.87509	13.632	13.1532	17.9421
17	55892093	55898929	+	ENSMUSG00000003198	protein_coding	ENSMUSG00000003198	Zfp959	ensembl_havana	10	5.99248	5.62966	6.50723	6.1047	6.88513	5.52658	7.42158	7.15402	6.01065	6.12419	6.82102	6.22199	5.6678	7.04562	6.00032	6.27219	6.57304	6.17241	5.5712	5.31741
17	56005711	56016791	+	ENSMUSG00000003199	protein_coding	ENSMUSG00000003199	Mpnd	ensembl_havana	16	41.6276	59.8222	39.643	60.9801	47.5541	59.1848	43.7899	56.433	44.0353	39.3642	49.2423	46.3664	93.7717	94.0021	42.7885	53.2022	43.6432	54.7257	44.8327	47.4206
17	56016750	56036636	-	ENSMUSG00000003200	protein_coding	ENSMUSG00000003200	Sh3gl1	ensembl_havana	10	124.067	139.542	132.48	154.496	144.856	157.601	170.294	177.092	156.622	180.254	129.956	156.309	129.203	149.365	123.316	152.744	137.097	166.454	152.101	159.364
17	55952640	55957023	+	ENSMUSG00000003206	protein_coding	ENSMUSG00000003206	Ebi3	ensembl_havana	7	0.0001	0.0001	0.031688	0.0660957	0.135101	0.128623	0.154073	0.191723	0.189907	0.141697	0.0898489	0.198671	0.135853	0.111345	0.0328881	0.0369947	0.155857	0.693247	0.0989953	0.0622908
17	55959099	55968286	+	ENSMUSG00000003208	protein_coding	ENSMUSG00000003208	Yju2	ensembl_havana	9	18.5091	18.2476	17.4683	22.1417	17.0439	17.6077	17.6762	16.6394	17.8103	21.3813	19.2363	17.3089	22.5352	24.8077	17.8368	18.9271	20.0616	20.3324	15.4937	18.6262
10	58446920	58494357	+	ENSMUSG00000003226	protein_coding	ENSMUSG00000003226	Ranbp2	ensembl_havana	7	303.59	247.053	324.188	265.666	190.857	214.633	263.478	254.922	270.665	268.221	263.712	294.183	252.603	240.883	304.831	258.152	204.789	198.438	341.98	347.305
10	58600789	58675655	-	ENSMUSG00000003227	protein_coding	ENSMUSG00000003227	Edar	ensembl_havana	4	0.0710157	0.0648075	0.126452	0.0990936	0.303851	0.353538	0.862347	0.638843	0.632789	0.849685	0.299263	0.496527	0.101915	0.0371817	0.0984642	0.184573	0.155857	0.198142	0.758298	0.40434
19	60889749	61095969	+	ENSMUSG00000003228	protein_coding	ENSMUSG00000003228	Grk5	ensembl_havana	9	7.12713	15.174	15.7309	24.3195	14.4789	30.9741	17.7377	28.6158	21.3217	28.0718	12.2059	19.4601	4.03876	10.42	19.0828	20.0339	12.1491	29.5744	21.7571	39.8333
16	20516982	20534011	+	ENSMUSG00000003233	protein_coding	ENSMUSG00000003233	Dvl3	ensembl_havana	12	56.7681	65.84	68.546	86.9824	79.3804	82.833	78.1874	84.921	69.4694	73.1352	59.5634	64.1054	49.8895	57.9958	63.8713	84.2306	57.6302	82.7487	76.0177	79.7287
16	20548577	20561380	+	ENSMUSG00000003234	protein_coding	ENSMUSG00000003234	Abcf3	ensembl_havana	16	58.541	70.3372	56.0372	61.4421	68.7492	63.169	69.3186	70.2299	60.4852	69.312	62.5252	62.2521	56.1681	66.5617	58.1333	62.3521	62.1471	82.5836	58.4802	66.2644
16	20498817	20509324	+	ENSMUSG00000003235	protein_coding	ENSMUSG00000003235	Eif2b5	ensembl_havana	13	127.613	145.624	110.116	132.915	83.1942	119.43	75.7854	119.062	90.8543	115.013	98.694	135.293	95.9438	133.494	124.464	144.369	68.1282	86.8745	91.3135	133.679
7	45806637	45814582	-	ENSMUSG00000003269	protein_coding	ENSMUSG00000003269	Cyth2	ensembl_havana	17	68.2919	68.1048	72.5577	82.8907	61.2904	76.4069	69.0106	73.9346	67.1917	63.2234	66.4442	62.2521	61.8697	59.442	56.4939	86.0015	59.6239	49.7086	73.9408	74.2248
7	45729983	45784670	-	ENSMUSG00000003271	protein_coding	ENSMUSG00000003271	Sult2b1	ensembl_havana	17	0.248305	0.25893	0.15804	0.0990936	0.438852	0.289276	0.308045	0.127849	0.442982	0.318694	0.359096	0.264861	0.644928	0.482162	0.0984642	0.110784	0.467371	0.891289	0.560507	0.342149
7	45699843	45704683	+	ENSMUSG00000003273	protein_coding	ENSMUSG00000003273	Car11	ensembl_havana	14	0.744715	1.2619	0.505508	0.594061	1.99136	0.546322	3.66465	1.59696	1.51855	0.778886	1.55575	0.463432	8.99376	4.37574	0.393557	0.55352	1.30846	2.97073	0.527542	0.124482
17	69969073	70821414	+	ENSMUSG00000003279	protein_coding	ENSMUSG00000003279	Dlgap1	ensembl_havana	17	0.141931	0.194223	0.884564	0.759051	0.337601	0.0322307	0.277251	0.415283	0.316445	0.247896	0.389012	0.198671	0.169792	0.148427	0.918166	0.258363	0.467371	0.099121	1.4176	0.777485
4	3900996	3938424	-	ENSMUSG00000003282	protein_coding	ENSMUSG00000003282	Plag1	ensembl_havana	9	1.52479	0.550114	2.93778	3.33288	0.202601	0.096492	0.585196	1.14984	0.917499	1.20368	0.628342	0.662003	3.93695	3.22621	0.393557	0.258363	0.0001	0.33017	1.54946	3.3584
2	153108468	153151442	+	ENSMUSG00000003283	protein_coding	ENSMUSG00000003283	Hck	ensembl_havana	14	0.319221	0.0648075	5.40165	0.528066	9.82139	0.417799	1.35506	0.127849	3.25845	0.318694	3.59006	0.430337	0.0340383	0.0001	3.21333	0.110784	6.97801	0.528212	14.274	0.217768
9	21002738	21008840	+	ENSMUSG00000003299	protein_coding	ENSMUSG00000003299	Mrpl4	ensembl_havana	10	70.6321	79.9463	53.3838	55.0735	50.4566	64.7113	65.3153	61.2555	51.1847	63.6481	72.577	77.6744	63.1594	85.5846	59.9695	72.166	53.4247	66.4762	50.3049	60.1386
9	21229730	21239362	-	ENSMUSG00000003308	protein_coding	ENSMUSG00000003308	Keap1	ensembl_havana	15	91.1268	97.0291	72.6209	104.669	80.8317	88.97	90.7208	80.1623	77.1565	88.0383	94.745	91.8061	75.0717	89.0332	76.3963	83.3082	79.623	95.7864	84.6215	94.4057
9	21294275	21312338	-	ENSMUSG00000003309	protein_coding	ENSMUSG00000003309	Ap1m2	ensembl_havana	14	0.0001	0.0324538	0.0001	0.0660957	0.0676003	0.0322307	0.0001	0.0001	0.0001	0.0001	0.0001	0.0001	0.0340383	0.0371817	0.0001	0.0001	0.0935542	0.132128	0.0001	0.0001
8	111154421	111259217	-	ENSMUSG00000003316	protein_coding	ENSMUSG00000003316	Glg1	ensembl_havana	14	276.536	394.037	239.405	375.648	254.341	371.045	269.267	415.822	301.793	372.897	210.91	290.542	256.744	338.148	317.782	312.203	249.585	284.884	273.808	402.53
10	80519584	80539125	-	ENSMUSG00000003341	protein_coding	ENSMUSG00000003341	Atp8b3	ensembl_havana	9	0.815631	0.77659	0.47392	0.429072	0.607603	0.417799	0.739169	0.479157	1.0124	1.23908	0.478761	0.562718	0.882497	0.66757	0.426345	0.516625	0.436219	1.8815	0.890158	0.932962
10	80642617	80657072	-	ENSMUSG00000003344	protein_coding	ENSMUSG00000003344	Btbd2	ensembl_havana	14	40.3866	59.8869	24.3229	50.5528	23.6252	44.9831	25.0361	52.5686	28.4395	43.4351	31.3823	41.4683	105.616	80.6898	24.5584	41.728	12.9902	27.3629	27.8886	38.6517
10	80622838	80640750	+	ENSMUSG00000003345	protein_coding	ENSMUSG00000003345	Csnk1g2	ensembl_havana	16	171.12	163.225	147.169	184.524	140.434	155.095	163.273	162.081	173.8	158.023	161.069	135.591	222.67	216.186	118.365	146.25	117.908	140.346	147.684	124.786
10	80583654	80590342	-	ENSMUSG00000003346	protein_coding	ENSMUSG00000003346	Abhd17a	ensembl_havana	14	58.1864	61.8605	54.2683	66.1938	54.3378	56.5501	61.2812	62.1179	63.9966	60.6038	64.9185	66.058	92.9572	86.4746	62.0023	55.4897	42.1791	46.837	62.6338	55.2255
10	80685253	80701978	-	ENSMUSG00000003348	protein_coding	ENSMUSG00000003348	Mob3a	ensembl_havana	10	47.9037	46.6542	57.4902	53.8196	35.269	36.1471	61.158	62.533	54.6961	53.8071	50.9176	53.9783	53.2154	51.729	58.1333	51.6895	26.8526	31.6868	80.1053	70.6177
15	98630840	98644530	+	ENSMUSG00000003352	protein_coding	ENSMUSG00000003352	Cacnb3	ensembl_havana	14	60.6685	90.2671	83.2345	102.854	151.538	128.523	160.994	136.212	187.782	173.846	107.579	104.084	88.2737	69.5282	81.1178	96.9961	161.209	187.15	108.884	102.646
15	98708207	98723337	+	ENSMUSG00000003354	protein_coding	ENSMUSG00000003354	Ccdc65	ensembl_havana	6	0.177389	0.291284	0.221216	0.297081	1.0801	0.353538	0.308045	0.415283	1.74	1.27448	0.56851	0.297956	1.05219	0.370917	0.983742	0.590414	0.342765	1.78248	0.758298	0.311054
15	98724366	98728199	-	ENSMUSG00000003355	protein_coding	ENSMUSG00000003355	Fkbp11	ensembl_havana	7	43.2587	47.9807	19.8374	15.0801	41.1078	24.8371	30.9486	20.0886	28.5344	27.8948	30.1856	26.5093	42.3551	57.18	32.2308	25.7157	52.4279	51.392	24.4932	20.5542
15	98645134	98662895	-	ENSMUSG00000003360	protein_coding	ENSMUSG00000003360	Ddx23	ensembl_havana	15	248.489	248.704	200.047	189.771	172.261	188.896	176.545	182.744	201.765	231.512	203.61	230.607	168.64	195.272	204.139	223.619	201.363	189.889	179.858	210.485
7	27532000	27553219	-	ENSMUSG00000003363	protein_coding	ENSMUSG00000003363	Pld3	ensembl_havana	15	22.5868	34.5863	29.756	43.6233	64.4629	59.9238	64.5762	76.8409	62.0353	69.2766	48.1055	50.2716	41.7103	47.3163	36.9195	30.5858	46.3534	68.0605	55.81	46.5499
7	25009849	25072347	-	ENSMUSG00000003378	protein_coding	ENSMUSG00000003378	Grik5	ensembl_havana	9	4.18413	13.9769	14.7201	45.3062	21.9377	86.3031	34.2128	62.7566	32.3305	46.8335	17.2618	28.6936	14.5596	8.23223	10.5579	35.7879	18.8467	58.4555	22.746	40.7351
7	24897381	24902198	+	ENSMUSG00000003379	protein_coding	ENSMUSG00000003379	Cd79a	ensembl_havana	7	0.106474	0.25893	0.094864	0.264083	0.0676003	0.289276	0.33884	0.44722	0.158272	0.247896	0.119765	0.463432	0.135853	0.22259	0.229616	0.0369947	0.124706	0.0001	0.362716	0.248863
7	24969752	24972755	-	ENSMUSG00000003380	protein_coding	ENSMUSG00000003380	Rabac1	ensembl_havana	11	25.4588	25.9155	25.9023	32.899	21.0602	32.677	28.3927	34.109	34.3235	31.7179	31.2327	31.1757	32.8185	27.8484	32.5587	26.5642	15.5135	19.8043	35.5365	32.8057
3	87525407	87540157	+	ENSMUSG00000003382	protein_coding	ENSMUSG00000003382	Etv3	ensembl_havana	18	44.8188	40.7011	31.5249	38.3766	29.869	29.5603	30.4559	29.6697	27.5221	27.1868	38.9511	37.1329	41.3031	32.5207	33.2472	33.7587	33.6124	32.71	37.2177	40.1754
9	22002806	22014223	+	ENSMUSG00000003402	protein_coding	ENSMUSG00000003402	Prkcsh	ensembl_havana	14	209.095	252.942	214.577	236.232	261.631	241.88	220.828	259.713	232.102	270.133	223.684	239.642	224.672	251.006	194.761	232.289	273.727	321.158	222.449	267.763
9	22015005	22052024	-	ENSMUSG00000003410	protein_coding	ENSMUSG00000003410	Elavl3	ensembl_havana	8	0.0710157	0.194223	0.0001	0.0330979	0.135101	0.096492	0.123278	0.0959114	0.221541	0.53109	0.329179	0.132481	0.0001	0.22259	0.196828	0.332152	0.0624028	0.198142	0.329751	0.435436
4	108879063	108943325	+	ENSMUSG00000003411	protein_coding	ENSMUSG00000003411	Rab3b	ensembl_havana	10	6.66618	8.21796	15.7941	16.466	9.48389	8.4826	15.3974	20.2483	12.8437	22.5495	6.25261	26.9396	10.0458	8.67721	16.4597	23.5758	8.94055	10.8924	34.5146	28.2036
2	13651021	13794065	-	ENSMUSG00000003418	protein_coding	ENSMUSG00000003418	St8sia6	ensembl_havana	11	0.0001	0.291284	0.0001	0.0330979	0.0001	0.0001	0.0308945	0.0320371	0.0633689	0.283295	0.0001	0.0331952	0.0001	0.0371817	0.0001	0.0001	0.0001	0.0001	0.0001	0.124482
7	45092990	45103852	-	ENSMUSG00000003420	protein_coding	ENSMUSG00000003420	Fcgrt	ensembl_havana	8	1.63116	1.42367	1.95856	2.24395	6.10888	6.9082	6.49775	7.88858	16.1653	13.9828	3.35072	2.94557	16.1548	4.07908	0.983742	2.39825	3.36445	9.14304	4.61522	1.80363
7	45062429	45078211	+	ENSMUSG00000003421	protein_coding	ENSMUSG00000003421	Nosip	ensembl_havana	13	81.9432	83.4081	74.5793	74.8062	69.9304	74.5112	69.2262	68.3775	72.7594	71.8962	77.8124	73.008	79.9588	80.6527	86.1671	93.4174	56.7891	65.552	62.5679	65.9223
7	45154303	45160066	+	ENSMUSG00000003423	protein_coding	ENSMUSG00000003423	Pih1d1	ensembl_havana	15	34.4297	31.0921	38.6638	46.6921	30.544	38.2035	36.9843	38.2289	38.6258	30.6205	36.1091	31.3081	29.6622	33.9298	38.3621	41.2852	26.3853	28.3531	40.8768	38.0609
7	45122379	45124440	-	ENSMUSG00000003429	protein_coding	ENSMUSG00000003429	Rps11	ensembl_havana	11	547.398	523.452	524.613	575.483	402.234	463.582	403.532	508.599	436.777	460.015	494.666	547.593	581.432	629.647	508.641	573.564	434.687	412.027	474.5	489.193
7	28314891	28338747	-	ENSMUSG00000003435	protein_coding	ENSMUSG00000003435	Supt5	ensembl_havana	9	333.091	321.111	255.894	263.257	282.793	309.001	359.588	334.989	314.194	297.213	309.933	297.592	366.364	342.709	263.321	305.082	235.162	250.787	306.18	335.271
7	28293553	28302239	-	ENSMUSG00000003436	protein_coding	ENSMUSG00000003436	Dll3	ensembl_havana	11	0.0710157	0.129515	0.063276	0.0330979	0.0338501	0.0001	0.0308945	0.0001	0.28481	0.0708987	0.0300163	0.0331952	0.0340383	0.0371817	0.131252	0.0738893	0.0001	0.033107	0.230856	0.0933862
7	28392951	28399389	+	ENSMUSG00000003437	protein_coding	ENSMUSG00000003437	Paf1	ensembl_havana	14	99.9558	95.8967	89.6468	102.689	91.058	89.6768	101.099	95.0451	99.9334	87.8259	101.237	98.6568	96.385	97.4137	90.3312	106.146	73.0813	79.811	103.642	99.4121
7	28305516	28312073	-	ENSMUSG00000003438	protein_coding	ENSMUSG00000003438	Timm50	ensembl_havana	17	120.06	110.035	100.576	95.5619	76.4104	72.8725	88.3804	91.2445	86.2356	80.746	95.0741	101.304	84.9478	87.9949	102.725	91.2406	79.9034	62.4494	96.6868	100.874
7	28386146	28392709	-	ENSMUSG00000003444	protein_coding	ENSMUSG00000003444	Med29	ensembl_havana	8	15.6016	14.5269	16.0468	13.1662	12.8589	12.756	15.7361	12.8069	14.552	13.3103	11.2187	12.2453	10.9961	11.755	15.4433	14.3152	12.0868	10.7604	19.3177	15.5478
6	149408886	149563330	+	ENSMUSG00000003452	protein_coding	ENSMUSG00000003452	Bicd1	ensembl_havana	15	16.098	15.9829	21.6695	19.5348	19.6089	22.4916	40.2178	25.8053	25.023	21.9831	19.6252	16.9448	16.3244	13.9799	23.7714	17.5988	19.7189	19.1772	14.5377	16.1386
1	172066013	172082796	-	ENSMUSG00000003458	protein_coding	ENSMUSG00000003458	Ncstn	ensembl_havana	12	106.976	138.312	113.812	163.306	170.472	195.258	120.684	163.486	125.241	143.863	124.153	136.286	155.404	137.314	123.873	154.736	148.748	182.562	121.872	160.701
1	172126755	172136494	+	ENSMUSG00000003464	protein_coding	ENSMUSG00000003464	Pex19	ensembl_havana	13	80.3476	110.229	75.5586	108.563	89.9105	109.18	66.7934	120.691	100.661	107.897	92.591	93.7587	179.432	143.061	69.7731	98.2137	73.5797	95.2253	68.8972	97.3287
14	70457476	70468833	+	ENSMUSG00000003469	protein_coding	ENSMUSG00000003469	Phyhip	ensembl_havana	9	1.56025	2.00603	6.50723	5.84072	3.51012	2.95612	7.82191	6.00428	1.51855	0.920483	1.31642	0.827479	1.73096	1.29796	7.08232	5.38672	3.08409	2.87171	0.560507	0.311054
6	55090049	55133017	-	ENSMUSG00000003476	protein_coding	ENSMUSG00000003476	Crhr2	ensembl_havana	16	0.0001	0.0001	0.0001	0.0001	0.0001	0.0001	0.0001	0.0001	0.0317345	0.0001	0.0001	0.0331952	0.0001	0.0001	0.0001	0.0001	0.0001	0.0001	0.0001	0.0001
6	55170626	55175044	-	ENSMUSG00000003477	protein_coding	ENSMUSG00000003477	Inmt	ensembl_havana	5	0.0001	0.0001	0.0001	0.0001	0.0001	0.0001	0.0001	0.0001	0.0001	0.0001	0.0001	0.0001	0.0001	0.0001	0.0001	0.0001	0.0001	0.0001	0.0001	0.0001
8	71988482	72009627	-	ENSMUSG00000003484	protein_coding	ENSMUSG00000003484	Cyp4f18	ensembl_havana	4	0.0001	0.0648075	0.094864	0.0001	0.0001	0.0322307	0.0616891	0.0320371	0.0633689	0.0354994	0.0001	0.0001	0.0001	0.0001	0.0001	0.0001	0.0001	0.033107	0.0001	0.0001
6	29200434	29216365	-	ENSMUSG00000003500	protein_coding	ENSMUSG00000003500	Impdh1	ensembl_havana	13	199.486	215.444	113.369	135.555	98.7868	149.344	83.9152	134.647	93.9544	118.376	116.464	173.485	152.96	190.229	148.169	143.779	99.7468	115.195	89.4015	123.449
7	18345422	18355010	-	ENSMUSG00000003505	protein_coding	ENSMUSG00000003505	Psg18	ensembl_havana	15	0.0001	0.0001	0.0001	0.0001	0.0001	0.0001	0.0001	0.0001	0.0001	0.0001	0.0001	0.0001	0.0001	0.0001	0.0001	0.0001	0.0001	0.0001	0.0001	0.0001
11	101971143	101987014	-	ENSMUSG00000003518	protein_coding	ENSMUSG00000003518	Dusp3	ensembl_havana	13	73.6461	61.1487	100.482	68.7346	129.466	74.1577	116.249	69.0163	130.619	93.4544	97.9161	91.9054	27.4562	23.7695	131.579	82.0169	144.169	96.1165	117.323	100.998
16	18060357	18090204	-	ENSMUSG00000003526	protein_coding	ENSMUSG00000003526	Prodh	ensembl_havana	12	5.92156	9.93271	2.46396	4.09183	4.15137	3.75939	0.831552	1.30952	2.78393	2.44266	4.93629	7.94294	5.83749	8.45472	4.1314	5.94014	2.58567	3.79591	1.35167	2.11459
16	17900709	17911349	-	ENSMUSG00000003527	protein_coding	ENSMUSG00000003527	Ess2	ensembl_havana	9	39.642	42.1247	36.3579	45.5041	43.774	45.2722	36.7688	41.5823	36.6961	41.2404	37.545	40.4093	34.6851	42.0878	33.739	45.8233	31.3384	48.7184	39.756	45.8036
16	17925223	17928220	-	ENSMUSG00000003528	protein_coding	ENSMUSG00000003528	Slc25a1	ensembl_havana	15	65.9517	73.702	48.0454	86.0585	77.2542	82.1904	85.9168	77.0644	71.4623	52.6743	56.7812	51.3307	97.7086	93.8167	61.5761	67.1853	49.8735	82.1875	52.6124	51.5252
16	18052860	18071633	+	ENSMUSG00000003531	protein_coding	ENSMUSG00000003531	Dgcr6	ensembl_havana	15	32.7632	42.2218	21.0377	26.4974	25.0765	25.7689	22.7881	26.5399	20.3094	20.5317	24.5315	26.6086	25.0805	31.5566	20.7222	26.306	18.2237	28.3861	29.2402	28.0481
17	35681567	35704622	-	ENSMUSG00000003534	protein_coding	ENSMUSG00000003534	Ddr1	ensembl_havana	17	182.502	99.3262	312.816	335.621	614.928	403.658	573.671	264.759	514.819	357.746	380.835	257.745	290.648	159.155	393.588	387.689	592.624	539.004	386.582	326.222
17	35821684	35822924	+	ENSMUSG00000003541	protein_coding	ENSMUSG00000003541	Ier3	ensembl_havana	6	65.8099	56.9427	63.7763	43.6563	111.578	55.7468	108.458	46.4686	79.7822	53.1699	63.9312	45.2743	34.719	36.6739	62.8876	43.1299	116.818	92.4527	78.9845	44.5909
7	19302696	19310052	-	ENSMUSG00000003545	protein_coding	ENSMUSG00000003545	Fosb	ensembl_havana	3	4.39687	3.10606	2.74826	0.825046	3.54387	1.9922	3.3875	3.70481	2.59413	2.54885	3.88922	3.01176	2.30791	1.89127	3.04939	1.69725	1.96264	1.81549	4.12074	4.54003
17	46630624	46646023	-	ENSMUSG00000003546	protein_coding	ENSMUSG00000003546	Klc4	ensembl_havana	10	10.5665	16.727	6.44405	19.5018	26.9327	31.6488	19.4622	25.4859	24.1056	25.7354	17.561	15.7203	23.6212	21.0254	13.8695	17.0454	18.6598	45.2197	16.2519	16.0142
7	19344778	19356525	+	ENSMUSG00000003549	protein_coding	ENSMUSG00000003549	Ercc1	ensembl_havana	9	30.6711	30.995	48.5193	32.47	24.5702	24.5158	30.1172	27.6896	25.276	25.4876	30.9934	24.5236	24.5036	27.3293	44.8214	35.7879	21.0273	21.8177	36.5914	29.945
19	46667165	46673173	-	ENSMUSG00000003555	protein_coding	ENSMUSG00000003555	Cyp17a1	ensembl_havana	8	0.0001	0.0001	0.0001	0.0001	0.0001	0.0001	0.0001	0.0001	0.0317345	0.0001	0.0001	0.0001	0.0001	0.0001	0.0001	0.0001	0.0001	0.033107	0.0001	0.0001
19	46707458	46741100	+	ENSMUSG00000003559	protein_coding	ENSMUSG00000003559	As3mt	ensembl_havana	8	0.390136	0.355991	0.94774	0.792049	2.76761	0.610583	2.06333	1.69277	4.14421	3.50464	1.58566	0.628908	4.41208	1.2238	0.721437	0.295257	5.04662	3.46584	0.989053	0.186672
8	70282827	70294362	+	ENSMUSG00000003573	protein_coding	ENSMUSG00000003573	Homer3	ensembl_havana	15	62.8314	63.187	53.9524	66.9198	104.153	78.4954	83.1761	65.6629	69.5959	61.2764	61.8072	45.9693	45.9526	48.0209	65.0844	54.0877	117.472	116.977	73.8749	49.8771
8	70382355	70439580	-	ENSMUSG00000003575	protein_coding	ENSMUSG00000003575	Crtc1	ensembl_havana	13	61.1649	60.1781	33.6413	42.0064	56.3291	57.5462	53.1823	49.854	42.8964	60.002	41.7932	41.8655	68.9289	72.6431	50.4937	50.7302	60.8699	77.5666	42.657	45.9591
11	4135202	4141173	+	ENSMUSG00000003581	protein_coding	ENSMUSG00000003581	Rnf215	ensembl_havana	14	13.4741	14.9152	14.878	16.862	15.4914	19.1821	16.044	17.5336	14.7418	20.2131	17.561	17.4412	13.5754	16.0194	13.017	14.8317	14.6413	18.352	19.2188	18.3153
11	4097039	4123416	-	ENSMUSG00000003585	protein_coding	ENSMUSG00000003585	Sec14l2	ensembl_havana	13	0.106474	0.582468	0.568684	0.957038	0.337601	1.47811	0.400429	2.01214	0.664424	1.30988	0.628342	1.65486	0.101915	0.148427	0.754226	1.3652	0.187008	0.363177	0.725332	1.89692
2	112492964	112634574	+	ENSMUSG00000003604	protein_coding	ENSMUSG00000003604	Aven	ensembl_havana	14	47.7973	51.1514	53.1943	42.6663	46.6766	45.1116	46.0687	42.1252	46.5977	41.3819	47.4473	44.9433	23.0442	29.7767	56.5595	50.9147	50.4342	51.1279	49.8434	50.7789
3	19957054	20009146	+	ENSMUSG00000003617	protein_coding	ENSMUSG00000003617	Cp	ensembl_havana	16	64.037	75.0932	13.962	35.0108	48.6003	70.9446	29.3473	15.809	41.5994	31.2223	27.8223	10.756	60.4103	26.8101	9.57422	34.3121	27.0395	56.7391	38.6022	37.6255
5	8966033	8997325	-	ENSMUSG00000003623	protein_coding	ENSMUSG00000003623	Crot	ensembl_havana	4	31.6994	43.4512	31.9356	51.8727	43.3353	57.2248	44.0363	56.465	59.3463	109.172	40.3273	42.6267	35.2281	35.6356	34.0669	46.6349	41.4937	75.7182	36.6243	51.4319
4	133847290	133887798	-	ENSMUSG00000003644	protein_coding	ENSMUSG00000003644	Rps6ka1	ensembl_havana	17	73.6461	51.8632	26.7235	29.0382	27.304	30.1387	33.1658	27.8174	40.3024	30.2666	38.8913	28.9253	106.668	59.1824	41.3459	35.751	25.5442	30.2015	27.7897	25.0008
8	110137502	110168211	-	ENSMUSG00000003657	protein_coding	ENSMUSG00000003657	Calb2	ensembl_havana	9	0.0001	0.0001	0.0001	0.0001	0.0001	0.0001	0.0001	0.0001	0.0001	0.0001	0.0001	0.0001	0.0001	0.0001	0.0001	0.0001	0.0001	0.0001	0.0001	0.0001
2	127208386	127240452	+	ENSMUSG00000003660	protein_coding	ENSMUSG00000003660	Snrnp200	ensembl_havana	10	450.137	445.964	451.361	336.281	364.063	317.066	376.556	404.708	422.953	417.182	389.869	400.782	353.672	368.407	427.95	364.003	370.577	343.702	377.022	411.33
2	127240938	127247817	-	ENSMUSG00000003662	protein_coding	ENSMUSG00000003662	Ciao1	ensembl_havana	10	52.9741	58.431	55.5002	51.6747	53.2241	51.3771	49.9488	51.0357	59.9158	61.4888	61.8969	57.354	53.2154	52.2482	48.4281	49.9924	54.0166	58.3565	56.3375	53.2976
17	17843323	17855206	-	ENSMUSG00000003665	protein_coding	ENSMUSG00000003665	Has1	ensembl_havana	7	0.815631	1.19719	0.505508	1.64999	0.168851	0.0322307	0.308045	0.606906	0.158272	0.0354994	1.07709	0.264861	12.15	2.52165	0.327981	0.110784	0.155857	0.297163	0.0330651	0.0622908
19	8774487	8786418	-	ENSMUSG00000003680	protein_coding	ENSMUSG00000003680	Taf6l	ensembl_havana	16	25.9552	29.895	29.9455	32.338	46.2716	33.3839	33.5045	31.4901	38.7523	41.6297	37.3656	37.0998	34.0403	36.0435	29.5421	33.6849	48.534	54.3296	29.1742	29.7895
1	121304353	121332590	-	ENSMUSG00000003721	protein_coding	ENSMUSG00000003721	Insig2	ensembl_havana	14	39.6065	59.6928	29.6612	65.3359	35.5728	74.6718	39.3555	67.9624	39.5115	75.2945	34.2543	39.3171	43.9503	60.1837	32.2636	39.1084	28.4102	55.848	35.4376	52.3647
4	129643980	129672768	-	ENSMUSG00000003731	protein_coding	ENSMUSG00000003731	Kpna6	ensembl_havana	13	167.928	150.607	174.082	152.813	124.673	126.627	158.992	164.7	155.8	162.2	139.769	157.732	124.214	123.927	192.4	169.273	122.799	104.467	174.517	184.489
10	53904785	54076610	-	ENSMUSG00000003746	protein_coding	ENSMUSG00000003746	Man1a	ensembl_havana	16	29.6074	14.9475	68.7672	80.9108	68.6817	65.9323	96.8181	84.3142	132.58	76.1441	57.918	43.5202	89.2579	41.5316	70.5928	48.1476	61.7421	74.761	74.732	91.3895
7	27207172	27228662	-	ENSMUSG00000003752	protein_coding	ENSMUSG00000003752	Itpkc	ensembl_havana	9	12.9422	15.8858	12.6669	12.9353	9.24764	12.9809	12.1639	15.0425	13.2866	13.0625	12.5949	13.9332	10.6907	12.4225	12.1645	17.0085	8.72249	10.2653	15.23	14.3973
7	27233023	27257951	+	ENSMUSG00000003762	protein_coding	ENSMUSG00000003762	Coq8b	ensembl_havana	13	7.41079	11.0327	9.63444	12.1103	9.99014	14.234	9.97753	11.0504	14.6785	11.4695	10.9794	10.6898	18.7001	15.6115	12.853	13.7249	7.10262	8.87898	9.85667	8.89338
18	34598615	34624602	-	ENSMUSG00000003778	protein_coding	ENSMUSG00000003778	Brd8	ensembl_havana	14	142.931	186.002	128.026	181.356	107.866	167.401	122.285	157.482	112.049	134.164	124.362	134.035	135.143	138.463	114.66	174.586	102.083	117.076	120.619	192.294
18	34624613	34633278	+	ENSMUSG00000003779	protein_coding	ENSMUSG00000003779	Kif20a	ensembl_havana	16	319.369	392.775	308.33	313.579	236.386	296.02	243.061	310.142	281.389	328.188	309.424	358.454	266.145	293.168	295.355	347.289	228.838	210.651	256.469	301.843
8	84856989	84869258	+	ENSMUSG00000003808	protein_coding	ENSMUSG00000003808	Farsa	ensembl_havana	18	190.834	195.158	130.143	127.306	129.297	121.133	120.93	128.164	131.631	148.536	137.525	156.673	132.428	180.81	181.744	161.599	185.195	141.105	114.982	134.021
8	84886393	84893922	-	ENSMUSG00000003809	protein_coding	ENSMUSG00000003809	Gcdh	ensembl_havana	14	20.672	24.6537	21.5115	29.4012	25.6165	28.2751	25.9907	29.8613	22.7769	29.0276	25.6084	20.9493	43.9503	41.8653	34.5915	34.2383	25.3573	29.6404	28.1853	28.639
4	116306762	116464184	-	ENSMUSG00000003810	protein_coding	ENSMUSG00000003810	Mast2	ensembl_havana	12	155.483	137.407	192.655	178.914	192.983	216.207	256.765	242.595	294.359	257.672	178.78	205.422	96.6226	107.166	204.63	179.566	186.908	157.576	225.251	257.999
8	84908560	84922916	+	ENSMUSG00000003812	protein_coding	ENSMUSG00000003812	Dnase2a	ensembl_havana	13	16.3462	22.3889	8.49727	16.961	22.9165	17.6398	23.1268	16.9268	24.4852	27.2222	16.8131	14.1979	18.768	20.0242	19.3778	17.5988	24.049	31.2907	18.0979	19.2792
8	84834019	84840666	-	ENSMUSG00000003813	protein_coding	ENSMUSG00000003813	Rad23a	ensembl_havana	15	111.409	106.185	110.053	116.846	105.166	104.232	97.7419	99.0053	98.668	102.056	98.0059	100.907	93.8736	101.938	145.841	117.805	123.173	108.527	103.082	106.16
8	84841850	84846935	-	ENSMUSG00000003814	protein_coding	ENSMUSG00000003814	Calr	ensembl_havana	8	947.115	1119.54	1115.59	1216.43	1769.59	1509.11	1621.18	1432.99	1467.55	1405.5	1147.68	1166.97	1504.38	1514.56	1663.24	1418.97	1976.8	2403.21	1033.75	1236.57
8	84872111	84888222	+	ENSMUSG00000003824	protein_coding	ENSMUSG00000003824	Syce2	ensembl_havana	12	59.1438	59.5634	9.03427	11.9123	16.3014	14.3625	14.5967	15.1064	17.4623	14.4784	21.6595	19.8903	37.7735	44.2385	13.6071	10.1092	24.1424	18.6491	26.1744	25.9337
8	107293470	107379518	+	ENSMUSG00000003847	protein_coding	ENSMUSG00000003847	Nfat5	ensembl_havana	16	130.981	162.578	158.982	132.091	149.547	146.195	139.838	146.975	126.538	133.633	107.489	150.649	131.104	141.689	218.762	156.802	155.695	153.252	196.307	195.87
8	107412486	107425052	-	ENSMUSG00000003848	protein_coding	ENSMUSG00000003848	Nob1	ensembl_havana	14	131.017	119.288	108.41	86.7845	81.0005	79.9412	88.3496	85.6875	92.9421	103.826	104.857	117.091	106.6	123.667	146.661	113.599	129.621	99.0541	96.5879	86.8185
8	107388225	107403207	-	ENSMUSG00000003849	protein_coding	ENSMUSG00000003849	Nqo1	ensembl_havana	8	2.76581	3.81784	2.27444	1.22102	5.33262	1.9922	5.35835	4.88648	8.98429	12.9563	4.2183	4.03771	5.36236	6.04441	9.3447	3.20993	6.41729	10.3313	2.63731	1.52377
7	45339122	45367020	-	ENSMUSG00000003863	protein_coding	ENSMUSG00000003863	Ppfia3	ensembl_havana	18	1.52479	2.94429	0.852976	2.17796	1.95761	3.40595	2.00174	4.4713	2.40432	1.94706	1.58566	2.052	2.88486	2.89247	2.72151	3.35751	0.654279	1.15535	1.4176	3.57607
7	45434844	45456620	+	ENSMUSG00000003865	protein_coding	ENSMUSG00000003865	Gys1	ensembl_havana	16	56.9454	69.8195	46.0554	55.8325	52.1778	49.6099	50.5339	61.6069	59.2198	42.6209	54.8666	52.5221	113.727	79.9482	50.7888	58.3305	34.7339	40.6317	49.7115	52.0849
7	45421760	45438097	-	ENSMUSG00000003868	protein_coding	ENSMUSG00000003868	Ruvbl2	ensembl_havana	14	290.045	252.068	220.769	202.64	178.842	145.938	170.386	162.145	185.22	165.527	198.824	198.604	258.135	255.678	204.598	216.941	172.267	149.027	169.935	152.212
7	45367891	45370584	-	ENSMUSG00000003872	protein_coding	ENSMUSG00000003872	Lin7b	ensembl_havana	9	0.531968	0.0971613	0.063276	0.0660957	0.371352	0.321407	0.400429	0.287534	0.348079	0.177097	0.179598	0.331052	0.339483	0.0742633	0.229616	0.147679	0.436219	0.363177	0.230856	0.155577
7	45461697	45466899	-	ENSMUSG00000003873	protein_coding	ENSMUSG00000003873	Bax	ensembl_havana	11	73.3978	76.6785	72.842	80.6139	53.2578	64.7434	67.0398	73.0084	62.0985	63.6127	70.9316	79.263	51.6203	72.6802	75.5438	86.9608	51.1507	51.1279	69.8532	82.5895
15	9505788	9530177	-	ENSMUSG00000003882	protein_coding	ENSMUSG00000003882	Il7r	ensembl_havana	5	0.177389	0.0324538	0.15804	0.132091	0.0001	0.0001	0.0001	0.0001	0.158272	0.0001	0.0898489	0.0331952	0.0679767	0.0371817	0.16404	0.0738893	0.0001	0.0001	0.0001	0.0001
10	71225464	71238281	-	ENSMUSG00000003923	protein_coding	ENSMUSG00000003923	Tfam	ensembl_havana	14	107.579	93.1466	76.8853	74.6083	60.6829	62.1087	76.9248	64.6728	81.8068	78.1619	91.0653	75.9866	120.108	102.716	61.4122	73.3098	67.9101	62.3503	76.4792	70.369
17	33329342	33358879	-	ENSMUSG00000003929	protein_coding	ENSMUSG00000003929	Zfp81	ensembl_havana	11	23.6505	22.0007	19.2688	19.9968	11.8802	12.2098	13.9808	15.0106	15.4693	15.3988	19.9244	18.0039	16.4602	16.4644	18.5581	20.2553	16.3546	12.9719	20.0099	18.5019
11	69554092	69560206	-	ENSMUSG00000003934	protein_coding	ENSMUSG00000003934	Efnb3	ensembl_havana	5	4.14867	3.10606	2.74826	2.37595	1.72136	2.63482	2.2789	3.25769	1.77163	2.69045	3.41056	4.17009	2.54548	2.41041	1.83623	2.17688	1.83803	2.70667	2.99993	2.54992
11	90249456	90278590	+	ENSMUSG00000003948	protein_coding	ENSMUSG00000003948	Mmd	ensembl_havana	17	59.002	88.4553	65.2609	59.4952	104.929	77.0816	60.111	47.0116	106.07	69.666	65.1578	58.9426	67.4016	47.7613	44.1656	46.7456	77.6294	85.6863	90.852	57.2467
11	90336536	90390896	-	ENSMUSG00000003949	protein_coding	ENSMUSG00000003949	Hlf	ensembl_havana	16	0.815631	1.42367	1.01092	4.6858	8.13389	7.03672	2.37128	1.69277	2.34105	3.43384	0.777924	1.12534	0.577052	1.37212	0.557497	1.32831	7.8814	18.187	1.21981	0.870771
16	36043761	36071595	-	ENSMUSG00000003955	protein_coding	ENSMUSG00000003955	Fam162a	ensembl_havana	8	98.5375	105.538	59.2276	79.3269	78.1992	99.9908	62.2666	78.278	49.4764	70.0554	70.2735	67.6466	153.605	126.894	68.8878	76.04	63.1128	96.1165	56.1727	77.9874
15	76904078	76906315	+	ENSMUSG00000003970	protein_coding	ENSMUSG00000003970	Rpl8	ensembl_havana	9	1483.98	1643.38	1301.77	1291.21	1095.66	1194.07	960.82	1194.96	1169.56	1464.26	1260.7	1418.82	1446.01	1779.18	1179.81	1309.1	1475.02	1546.68	1083.2	1144.87
5	9485541	9725171	-	ENSMUSG00000003974	protein_coding	ENSMUSG00000003974	Grm3	ensembl_havana	6	0.0001	0.0001	0.0001	0.0330979	0.0001	0.0322307	0.308045	0.0320371	1.89817	0.778886	0.0300163	0.0001	0.0679767	0.0371817	0.0001	0.0001	0.124706	0.066114	0.0001	0.0001
13	91460283	91703430	+	ENSMUSG00000003992	protein_coding	ENSMUSG00000003992	Ssbp2	ensembl_havana	15	42.7268	47.7219	47.0662	38.6076	70.6054	52.1161	42.6505	50.0456	47.7365	43.2581	42.4513	40.9719	51.9936	43.4598	53.1496	63.8647	58.3466	46.705	36.6903	39.5845
11	26386135	26471877	+	ENSMUSG00000004018	protein_coding	ENSMUSG00000004018	Fancl	ensembl_havana	9	2.09211	2.78252	11.4665	13.8592	7.93138	8.61112	8.83813	8.46344	11.2936	10.5137	8.58608	7.34723	7.12715	5.30278	9.80373	10.3675	9.59473	8.68094	7.94469	7.24533
1	158245269	158356327	-	ENSMUSG00000004031	protein_coding	ENSMUSG00000004031	Brinp2	ensembl_havana	13	0.0001	0.0001	0.063276	0.0660957	0.0676003	0.0001	0.154073	0.0320371	0.0001	0.0001	0.0001	0.0662903	0.0001	0.0001	0.0984642	0.0001	0.0624028	0.066114	0.164926	0.0622908
3	107895821	107898687	+	ENSMUSG00000004032	protein_coding	ENSMUSG00000004032	Gstm5	ensembl_havana	10	41.734	48.2072	19.174	20.4588	35.9778	33.0947	32.7347	41.4865	26.8894	27.116	35.5107	37.861	62.0394	59.5533	14.8531	20.8087	29.5628	40.3017	36.2947	41.4814
3	107926334	107931818	-	ENSMUSG00000004035	protein_coding	ENSMUSG00000004035	Gstm7	ensembl_havana	12	0.531968	2.45899	0.347568	2.47494	1.82261	3.08465	1.60142	3.92837	1.36038	2.79665	0.927505	1.12534	5.76962	6.37815	0.623073	2.7303	0.654279	3.23479	1.54946	2.39445
3	107963696	107969284	-	ENSMUSG00000004038	protein_coding	ENSMUSG00000004038	Gstm3	ensembl_havana	9	0.0355578	0.0001	0.0001	0.0001	0.10135	0.0001	0.0308945	0.0001	0.0001	0.0001	0.0001	0.0001	0.0001	0.0001	0.0001	0.0001	0.0001	0.0001	0.0001	0.0001
11	100885098	100939541	-	ENSMUSG00000004040	protein_coding	ENSMUSG00000004040	Stat3	ensembl_havana	16	93.857	147.792	115.107	141.693	284.683	225.782	257.689	232.215	246.338	200.962	200.709	156.375	166.671	149.884	127.119	131.788	227.499	320.003	181.836	182.717
11	100859351	100885170	+	ENSMUSG00000004043	protein_coding	ENSMUSG00000004043	Stat5a	ensembl_havana	14	2.65944	6.30908	5.37006	8.21657	7.52638	16.3225	11.7944	16.7352	9.90169	14.1598	9.0049	9.66389	5.19267	3.37453	6.65608	9.33445	6.54189	15.5464	10.6149	10.8524
11	100956733	100970888	-	ENSMUSG00000004044	protein_coding	ENSMUSG00000004044	Cavin1	ensembl_havana	9	496.871	445.641	587.252	547.567	447.19	606.692	459.855	624.052	523.677	667.101	614.391	680.039	593.208	558.932	692.156	685.577	354.378	513.391	595.845	608.568
19	5688742	5702866	+	ENSMUSG00000004054	protein_coding	ENSMUSG00000004054	Map3k11	ensembl_havana	9	57.2645	60.7928	60.8702	72.3974	105.334	98.2236	83.638	78.278	86.3622	99.0121	72.9061	77.1449	79.5176	69.2316	66.1992	75.3759	107.254	128.265	66.26	68.2545
7	27591552	27640827	+	ENSMUSG00000004056	protein_coding	ENSMUSG00000004056	Akt2	ensembl_havana	15	105.806	99.9732	90.3102	112.226	99.7993	105.485	117.112	103.86	110.974	96.2864	96.8691	98.5244	114.338	97.5249	103.709	100.722	88.1274	95.0603	105.983	103.734
16	4639989	4707696	+	ENSMUSG00000004069	protein_coding	ENSMUSG00000004069	Dnaja3	ensembl_havana	17	95.0626	88.52	76.1903	79.3929	80.7305	71.78	76.9864	70.2618	80.2251	84.4984	78.4705	80.4875	75.0717	82.8035	85.872	76.2982	70.7137	87.1386	73.809	71.7372
16	4726361	4766743	+	ENSMUSG00000004070	protein_coding	ENSMUSG00000004070	Hmox2	ensembl_havana	15	49.0028	57.0721	42.1701	51.1138	59.6366	57.257	52.2276	54.2294	39.5748	45.5237	43.5582	40.4424	56.1341	58.5521	42.1656	37.9647	54.1101	70.107	42.8877	44.7153
16	4750348	4790293	-	ENSMUSG00000004071	protein_coding	ENSMUSG00000004071	Cdip1	ensembl_havana	13	61.5904	63.5105	46.7187	75.2682	52.7516	77.1459	64.0527	73.2639	55.5186	65.8075	48.2551	56.7252	44.8666	49.2075	60.7236	77.9954	46.1042	81.1313	68.9302	96.7068
2	72285637	72442611	+	ENSMUSG00000004085	protein_coding	ENSMUSG00000004085	Map3k20	ensembl_havana	14	60.633	68.6224	110.748	114.503	64.8341	79.1058	53.4902	81.0885	63.0476	63.8959	60.3413	76.7809	46.5296	60.9995	143.12	133.854	63.6424	44.9886	80.9624	164.837
9	14500617	14510578	+	ENSMUSG00000004096	protein_coding	ENSMUSG00000004096	Cwc15	ensembl_havana	9	112.65	115.73	102.535	113.909	92.2393	107.895	95.6479	110.886	102.844	138.093	123.913	131.289	86.7804	112.246	99.184	113.894	108.532	129.388	106.741	130.103
9	20770050	20815068	-	ENSMUSG00000004098	protein_coding	ENSMUSG00000004098	Col5a3	ensembl_havana	7	0.49651	0.291284	1.5795	0.429072	0.843854	0.257145	0.831552	0.862403	1.77163	0.778886	0.538593	0.297956	0.882497	0.333835	1.21326	0.848677	0.342765	0.066114	1.78022	0.74639
9	20907209	20959889	-	ENSMUSG00000004099	protein_coding	ENSMUSG00000004099	Dnmt1	ensembl_havana	16	517.649	467.739	426.027	370.599	333.654	318.415	321.249	328.186	333.111	377.393	439.321	451.153	375.596	442.014	343.357	370.644	381.511	331.126	380.681	425.478
9	20888175	20892179	+	ENSMUSG00000004100	protein_coding	ENSMUSG00000004100	Ppan	ensembl_havana	12	205.124	206.805	160.436	151.559	149.615	139.993	155.574	132.667	138.243	146.412	180.276	180.303	168.165	231.872	142.333	167.244	182.952	168.336	125.531	149.849
2	33216069	33247718	+	ENSMUSG00000004105	protein_coding	ENSMUSG00000004105	Angptl2	ensembl_havana	8	115.344	53.5456	34.4626	13.4302	15.3902	30.46	9.33084	66.5571	17.0511	70.2678	10.2315	30.7124	26.5399	56.698	1.96738	8.33829	11.6819	93.3769	24.2954	22.1089
1	154390731	154884502	-	ENSMUSG00000004110	protein_coding	ENSMUSG00000004110	Cacna1e	ensembl_havana	17	0.0001	0.0001	0.0001	0.0001	0.0001	0.0001	0.0001	0.0001	0.0001	0.106298	0.0001	0.0001	0.0001	0.0001	0.0001	0.0001	0.0001	0.0001	0.0001	0.0001
2	24603887	24763153	-	ENSMUSG00000004113	protein_coding	ENSMUSG00000004113	Cacna1b	ensembl_havana	18	0.0710157	0.161869	0.063276	0.495068	0.0338501	0.192884	0.154073	0.415283	0.221541	0.424892	0.0001	0.198671	0.305545	0.519243	0.131252	0.0369947	0.0624028	0.132128	0.230856	0.155577
3	138143448	138159822	+	ENSMUSG00000004127	protein_coding	ENSMUSG00000004127	Trmt10a	ensembl_havana	12	39.4647	34.7157	39.0744	40.2575	36.0453	32.0987	29.1933	28.2645	31.856	31.1161	36.3783	34.5845	23.3497	24.6965	37.2473	38.8871	41.3068	36.9019	34.6464	39.7711
12	38779380	38870485	+	ENSMUSG00000004151	protein_coding	ENSMUSG00000004151	Etv1	ensembl_havana	17	0.0001	5.14435	0.031688	2.63993	0.0001	0.0643614	0.0001	0.287534	0.158272	1.59307	0.0001	1.58867	1.69702	3.74535	0.0001	0.295257	0.0001	0.066114	0.0001	0.715294
15	76659858	76668197	+	ENSMUSG00000004187	protein_coding	ENSMUSG00000004187	Kifc2	ensembl_havana	11	0.780173	1.6825	0.852976	1.78198	2.09261	3.37382	6.00503	4.66292	2.53086	4.53122	2.30365	1.65486	4.0727	2.81831	0.885378	1.69725	1.0904	2.70667	2.76917	3.48278
10	60277627	60302598	+	ENSMUSG00000004207	protein_coding	ENSMUSG00000004207	Psap	ensembl_havana	14	540.732	637.175	450.003	517.736	553.705	588.827	762.534	762.627	727.656	651.207	628.99	620.832	760.49	645.666	513.068	512.688	436.057	512.929	759.516	745.885
X	74393290	74453855	+	ENSMUSG00000004221	protein_coding	ENSMUSG00000004221	Ikbkg	ensembl_havana	16	37.9755	48.0131	46.0554	79.03	32.7715	73.3223	34.7363	70.7728	36.0634	53.3115	41.1051	70.559	44.2557	47.3905	59.8711	110.278	27.6937	35.6147	51.8542	113.592
19	44756045	44837872	+	ENSMUSG00000004231	protein_coding	ENSMUSG00000004231	Pax2	ensembl_havana	15	0.0001	0.0001	0.031688	0.0001	0.0001	0.0001	0.0001	0.0001	0.0001	0.0001	0.0001	0.0001	0.0001	0.0001	0.0001	0.0001	0.0001	0.0001	0.0001	0.0001
3	99141068	99239187	+	ENSMUSG00000004233	protein_coding	ENSMUSG00000004233	Wars2	ensembl_havana	14	35.8125	32.0627	20.5639	21.2177	20.2502	18.9251	17.6454	14.9786	16.5766	14.3722	24.0528	23.1005	31.0876	31.3341	23.2141	25.0516	19.2828	22.2798	15.9552	22.6375
6	124742544	124756525	-	ENSMUSG00000004263	protein_coding	ENSMUSG00000004263	Atn1	ensembl_havana	15	19.0055	18.9594	18.0684	13.4632	25.7852	27.1505	24.5433	16.0964	21.4166	18.3724	21.3005	18.4672	21.1097	19.6163	16.5581	17.8202	23.5505	25.6135	19.0869	18.1909
6	124712336	124716951	+	ENSMUSG00000004264	protein_coding	ENSMUSG00000004264	Phb2	ensembl_havana	17	444.11	463.791	357.576	349.876	369.767	372.33	298.368	302.988	336.559	362.49	435.043	454.165	553.093	544.396	342.898	353.746	397.928	348.785	297.214	276.842
6	124720707	124738715	-	ENSMUSG00000004266	protein_coding	ENSMUSG00000004266	Ptpn6	ensembl_havana	15	1.84391	4.49727	1.95856	2.87091	3.03761	5.97641	1.63221	3.51319	2.97374	3.82323	2.18399	2.87938	1.5952	2.07667	2.26248	3.13615	2.11839	2.97073	0.956088	1.55487
6	124760053	124769674	-	ENSMUSG00000004267	protein_coding	ENSMUSG00000004267	Eno2	ensembl_havana	16	4.46779	14.6887	7.29693	12.1763	14.6814	22.7165	18.2305	15.9687	28.218	31.5055	18.2191	23.266	4.24239	18.6893	6.06589	9.48203	14.7036	39.5755	13.8784	11.6609
6	124704085	124712179	-	ENSMUSG00000004268	protein_coding	ENSMUSG00000004268	Emg1	ensembl_havana	11	220.796	214.7	146.505	136.512	164.937	156.284	132.632	133.21	136.345	151.863	183.088	177.887	241.879	238.435	153.317	155.179	175.071	185.664	133.278	121.863
6	124663027	124704419	+	ENSMUSG00000004270	protein_coding	ENSMUSG00000004270	Lpcat3	ensembl_havana	13	57.1582	76.4844	53.0679	82.6927	86.063	101.405	100.975	99.4524	83.7365	69.489	64.8287	62.7154	84.0314	84.843	74.888	68.8455	69.6858	105.127	59.2384	53.3598
6	29467718	29470513	+	ENSMUSG00000004285	protein_coding	ENSMUSG00000004285	Atp6v1f	ensembl_havana	12	58.1864	54.5809	49.2774	54.4136	70.6392	70.4627	73.2603	61.1597	84.0529	75.0113	83.2871	79.5278	67.6053	63.1502	70.7568	59.3636	69.2185	75.6191	80.8965	71.6439
11	44400063	44414034	+	ENSMUSG00000004296	protein_coding	ENSMUSG00000004296	Il12b	ensembl_havana	14	0.0001	0.0001	0.0001	0.0660957	0.0001	0.0322307	0.0001	0.0001	0.0001	0.0001	0.0001	0.0001	0.0001	0.0001	0.0001	0.0001	0.0001	0.0001	0.0660302	0.0001
X	7153810	7319359	-	ENSMUSG00000004317	protein_coding	ENSMUSG00000004317	Clcn5	ensembl_havana	14	138.995	85.4464	131.217	95.4299	87.413	68.6955	149.785	93.4801	125.462	65.2057	118.14	95.3142	58.3062	48.4658	148.596	95.6679	75.698	82.7487	110.598	134.457
8	60910389	60983301	-	ENSMUSG00000004319	protein_coding	ENSMUSG00000004319	Clcn3	ensembl_havana	15	92.226	67.8136	97.1963	119.782	113.266	99.4124	124.04	69.5911	51.0897	36.7092	89.8387	69.7978	81.0449	71.7531	157.809	100.169	114.544	116.845	101.895	96.0227
7	17031507	17062428	-	ENSMUSG00000004328	protein_coding	ENSMUSG00000004328	Hif3a	ensembl_havana	15	0.0355578	0.0001	0.0001	0.0330979	0.10135	0.0322307	0.184867	0.0001	0.0633689	0.0001	0.0300163	0.0001	2.68123	0.0371817	0.0328881	0.0369947	0.0935542	0.165135	0.0330651	0.0001
13	21312125	21319625	+	ENSMUSG00000004341	protein_coding	ENSMUSG00000004341	Gpx6	ensembl_havana	8	0.0355578	0.0648075	0.0001	0.0990936	0.0001	0.225015	0.0616891	0.0001	0.0001	0.0354994	0.0001	0.0993855	0.0001	0.0001	0.0001	0.0001	0.0001	0.066114	0.0001	0.0622908
13	21286429	21292732	-	ENSMUSG00000004344	protein_coding	ENSMUSG00000004344	Gpx5	ensembl_havana	12	0.0355578	0.0001	0.0001	0.0660957	0.0001	0.0001	0.0001	0.191723	0.0001	0.0708987	0.0001	0.0662903	0.0001	0.0371817	0.0001	0.0001	0.0001	0.066114	0.0001	0.0933862
6	56069804	56569104	-	ENSMUSG00000004347	protein_coding	ENSMUSG00000004347	Pde1c	ensembl_havana	16	0.0001	0.0971613	0.0001	0.0330979	0.0001	1.70303	0.0308945	0.0320371	0.0317345	0.0001	0.0300163	0.0331952	0.0001	0.0001	0.0001	0.0001	0.0001	0.0001	0.0001	0.0622908
10	88746607	88826805	-	ENSMUSG00000004356	protein_coding	ENSMUSG00000004356	Utp20	ensembl_havana	8	266.927	227.803	245.091	164.461	125.146	106.16	142.61	142.536	177.944	178.059	186.259	191.853	146.342	177.065	227.385	168.387	158.966	107.966	201.977	217.606
10	88674772	88685016	-	ENSMUSG00000004359	protein_coding	ENSMUSG00000004359	Spic	ensembl_havana	16	0.0001	0.0001	0.0001	0.0001	0.0001	0.0001	0.0001	0.0001	0.0001	0.0001	0.0001	0.0001	0.0001	0.0001	0.0001	0.0001	0.0001	0.0001	0.0001	0.0001
10	29211606	29230780	+	ENSMUSG00000004360	protein_coding	ENSMUSG00000004360	9330159F19Rik	ensembl_havana	9	0.638341	0.647175	2.52714	1.97997	3.27386	5.20527	6.03583	5.01423	4.17585	6.26579	5.41495	3.93842	2.30791	1.2238	7.9676	5.82945	1.80688	2.07954	0.890158	0.186672
1	80264923	80340481	-	ENSMUSG00000004364	protein_coding	ENSMUSG00000004364	Cul3	ensembl_havana	14	229.058	202.891	219.916	222.703	217.655	207.661	210.327	218.418	217.867	213.529	231.433	224.121	212.522	187.559	194.499	191.188	244.414	210.387	225.185	221.555
16	23889573	23890959	-	ENSMUSG00000004366	protein_coding	ENSMUSG00000004366	Sst	ensembl_havana	4	0.0001	0.0001	0.0001	0.0001	0.0001	0.0001	0.0001	0.0001	0.0001	0.0001	0.0001	0.0001	0.0001	0.0001	0.0001	0.0001	0.0001	0.0001	0.0001	0.124482
7	4772373	4782860	-	ENSMUSG00000004371	protein_coding	ENSMUSG00000004371	Il11	ensembl_havana	15	0.248305	0.323638	0.252804	1.15502	0.0676003	0.321407	0.215662	0.191723	0.126638	0.495691	0.329179	0.198671	0.20373	0.22259	0.426345	0.369047	0.0624028	0.165135	0.296786	0.715294
8	72814599	73353541	-	ENSMUSG00000004383	protein_coding	ENSMUSG00000004383	Large1	ensembl_havana	18	54.3924	72.4402	56.2267	73.7173	84.2405	82.8009	105.625	87.4121	95.726	91.2242	60.6105	59.2735	51.3149	50.802	101.086	91.6095	78.4081	69.4138	76.3473	91.9803
11	6258919	6267773	-	ENSMUSG00000004393	protein_coding	ENSMUSG00000004393	Ddx56	ensembl_havana	10	131.194	123.883	109.674	108.101	107.461	92.7292	96.2946	87.3163	97.4026	111.048	131.392	121.592	144.577	138.908	114.43	121.826	130.742	119.584	100.807	109.705
11	6270369	6274871	-	ENSMUSG00000004394	protein_coding	ENSMUSG00000004394	Tmed4	ensembl_havana	12	59.0729	67.1018	71.5469	91.3052	87.7842	94.3358	89.7354	91.5958	71.5572	84.994	88.1634	87.1727	75.8862	81.6539	68.2649	82.2383	89.6538	90.7364	73.1497	95.4941
5	136741759	136883210	-	ENSMUSG00000004415	protein_coding	ENSMUSG00000004415	Col26a1	ensembl_havana	15	0.0001	0.0324538	0.0001	0.0330979	0.0338501	0.0001	0.0001	0.0639743	0.0317345	0.106298	0.0898489	0.0001	0.0001	0.0001	0.0656761	0.0369947	0.0312514	0.0001	0.0001	0.0933862
6	120891930	120916854	-	ENSMUSG00000004446	protein_coding	ENSMUSG00000004446	Bid	ensembl_havana	12	104.211	64.3194	38.6322	29.0382	38.104	33.4481	39.0784	24.6556	44.4149	31.5763	50.4091	36.4048	39.6401	49.8008	39.7065	35.0131	37.631	29.2773	50.5027	32.7746
1	119470305	119504795	-	ENSMUSG00000004451	protein_coding	ENSMUSG00000004451	Ralb	ensembl_havana	14	52.5486	64.9988	58.1536	66.2928	60.4129	60.4379	70.4272	69.0802	78.3587	67.0465	59.0549	58.0821	60.0031	53.8798	69.6092	63.6065	53.1444	59.2477	69.9191	74.0071
5	122158278	122175274	+	ENSMUSG00000004455	protein_coding	ENSMUSG00000004455	Ppp1cc	ensembl_havana	16	61.1649	61.6987	84.9086	86.5865	52.8191	60.4379	52.1044	65.2796	56.436	62.657	52.9519	62.8478	53.9281	58.4408	55.5431	67.5542	55.7611	54.4617	74.6661	78.8269
16	22857845	22879635	+	ENSMUSG00000004460	protein_coding	ENSMUSG00000004460	Dnajb11	ensembl_havana	17	144.065	118.318	132.101	134.103	164.431	138.74	165.182	160.133	130.366	142.695	116.255	128.145	78.8728	97.3766	158.268	133.337	152.455	177.281	140.794	166.578
16	22813214	22857670	-	ENSMUSG00000004462	protein_coding	ENSMUSG00000004462	Tbccd1	ensembl_havana	7	35.3161	27.5979	21.2272	22.0757	25.7515	22.8129	22.6341	23.6017	20.9421	24.6735	24.7708	22.5048	22.1958	26.4764	28.9848	24.2768	21.1519	28.3531	19.7132	21.3315
7	44302687	44306903	-	ENSMUSG00000004473	protein_coding	ENSMUSG00000004473	Clec11a	ensembl_havana	10	0.248305	0.25893	0.094864	0.0990936	0.168851	0.160753	0.184867	0.127849	0.348079	0.141697	0.0599326	0.264861	0.509175	0.370917	0.229616	0.295257	0.405068	0.297163	0.362716	0.217768
7	12965838	12974237	+	ENSMUSG00000004500	protein_coding	ENSMUSG00000004500	Zfp324	ensembl_havana	9	11.3821	15.3034	12.7932	13.9252	10.0914	11.0852	12.0408	16.0006	7.30766	9.23933	9.51348	10.9877	11.9125	13.3124	11.0825	10.884	8.62903	9.30808	13.8454	13.0291
7	97081586	97308947	+	ENSMUSG00000004508	protein_coding	ENSMUSG00000004508	Gab2	ensembl_havana	6	8.08449	4.17374	18.0684	24.3855	23.524	41.6736	27.1609	43.7221	26.8261	24.1779	11.8769	21.6443	1.79883	2.44749	11.771	16.3075	16.3234	24.6563	20.1418	42.1344
5	113842436	113908759	-	ENSMUSG00000004530	protein_coding	ENSMUSG00000004530	Coro1c	ensembl_havana	12	441.521	321.661	673.298	583.369	433.014	352.185	443.595	385.513	523.772	474.316	428.88	400.319	268.011	239.436	481.886	416.947	508.391	393.213	475.456	455.859
6	52713729	52766781	+	ENSMUSG00000004535	protein_coding	ENSMUSG00000004535	Tax1bp1	ensembl_havana	12	159.312	161.445	162.078	183.699	207.597	253.158	186.738	190.92	251.81	252.999	203.79	192.746	150.788	143.172	156.629	162.595	184.292	209.099	197.659	207.5
7	18813937	18821608	-	ENSMUSG00000004540	protein_coding	ENSMUSG00000004540	Psg17	ensembl_havana	7	0.0001	0.0001	0.0001	0.0001	0.0001	0.0643614	0.0001	0.0001	0.0317345	0.0354994	0.0001	0.0331952	0.0001	0.0001	0.0001	0.0001	0.0312514	0.0001	0.0001	0.0311954
7	18789567	18798521	-	ENSMUSG00000004542	protein_coding	ENSMUSG00000004542	Psg19	ensembl_havana	15	0.0001	0.0001	0.0001	0.0001	0.0001	0.0001	0.0001	0.0001	0.0001	0.0001	0.0001	0.0001	0.0001	0.0001	0.0001	0.0001	0.0001	0.0001	0.0001	0.0001
1	131638306	131675506	+	ENSMUSG00000004552	protein_coding	ENSMUSG00000004552	Ctse	ensembl_havana	16	0.0001	0.0001	0.0001	0.0001	0.0001	0.0001	0.0001	0.0001	0.0317345	0.0001	0.0599326	0.0331952	0.0001	0.0001	0.16404	0.0001	0.0001	0.0001	0.13196	0.0001
14	51905271	51914159	-	ENSMUSG00000004558	protein_coding	ENSMUSG00000004558	Ndrg2	ensembl_havana	15	55.6335	129.156	5.49641	6.76466	9.92264	14.8123	32.0264	32.7676	16.7031	22.3371	7.12018	11.782	49.9913	78.4278	21.4763	32.2091	7.38298	25.0854	14.1421	19.1549
14	51884842	51893040	+	ENSMUSG00000004561	protein_coding	ENSMUSG00000004561	Mettl17	ensembl_havana	14	43.1523	43.5483	22.775	24.4185	20.5539	25.7689	26.2678	27.3702	20.5625	23.7531	30.0959	29.4217	32.7845	41.1237	23.0501	29.2945	18.7844	23.9302	18.4606	24.1612
14	51984719	52006252	+	ENSMUSG00000004562	protein_coding	ENSMUSG00000004562	Arhgef40	ensembl_havana	16	51.1303	117.509	80.9601	53.6876	37.7665	36.6291	92.7532	58.9241	56.9105	46.8335	34.7628	31.7384	26.3702	56.4384	22.6239	44.7902	17.881	11.1895	86.4017	60.3563
8	3515384	3544268	+	ENSMUSG00000004565	protein_coding	ENSMUSG00000004565	Pnpla6	ensembl_havana	15	65.9162	78.9433	64.1553	73.5193	89.6067	82.8651	89.489	81.2801	52.6398	54.2673	63.1833	55.269	64.5508	76.7221	122.07	98.9516	76.321	93.4099	68.4357	86.1965
8	3500457	3515233	+	ENSMUSG00000004567	protein_coding	ENSMUSG00000004567	Mcoln1	ensembl_havana	16	25.6361	34.6186	27.7975	30.8531	40.3653	41.288	32.8271	31.5859	52.6082	49.8778	40.4768	40.3431	41.337	49.1333	40.2966	35.7141	37.0391	49.5436	32.7674	39.2114
8	3393006	3456602	+	ENSMUSG00000004568	protein_coding	ENSMUSG00000004568	Arhgef18	ensembl_havana	12	38.3655	48.2072	67.9459	75.0702	77.5242	87.749	73.8454	76.6173	69.3745	69.8784	75.7482	70.3273	54.1657	46.6859	92.9543	88.5104	65.5738	77.4345	72.9189	88.1866
3	142790902	142882005	-	ENSMUSG00000004591	protein_coding	ENSMUSG00000004591	Pkn2	ensembl_havana	16	295.825	197.973	253.873	221.119	225.789	208.689	214.884	179.295	209.041	189.21	226.257	221.208	179.127	165.088	242.304	229.153	269.896	251.051	268.303	267.98
7	43524216	43544429	-	ENSMUSG00000004609	protein_coding	ENSMUSG00000004609	Cd33	ensembl_havana	11	0.0001	0.0324538	0.063276	0.0001	0.0001	0.0001	0.0001	0.0001	0.0001	0.0001	0.0001	0.0001	0.0001	0.0001	0.0001	0.0001	0.0001	0.0001	0.0001	0.217768
7	43444083	43457801	+	ENSMUSG00000004610	protein_coding	ENSMUSG00000004610	Etfb	ensembl_havana	4	10.5311	10.3533	15.0044	13.4302	12.1164	13.9127	12.2563	12.232	15.3744	12.7085	15.7959	14.0986	16.5281	11.6067	17.5417	15.1638	13.6133	10.5953	15.8234	14.304
7	43437073	43438250	+	ENSMUSG00000004612	protein_coding	ENSMUSG00000004612	Nkg7	ensembl_havana	9	0.0001	0.0001	0.0001	0.0001	0.0001	0.0001	0.0001	0.0001	0.0317345	0.0001	0.0300163	0.0001	0.0001	0.0001	0.0001	0.0001	0.0001	0.0001	0.0001	0.0001
8	3630955	3643645	+	ENSMUSG00000004626	protein_coding	ENSMUSG00000004626	Stxbp2	ensembl_havana	14	33.6496	35.7187	41.2856	54.9085	84.8817	93.0184	67.163	51.2592	82.566	75.6839	67.8802	58.4461	84.6423	66.0426	100.299	81.4635	81.2118	90.2412	40.9098	33.9252
8	3623371	3625546	-	ENSMUSG00000004630	protein_coding	ENSMUSG00000004630	Pcp2	ensembl_havana	18	0.0001	0.0001	0.031688	0.0001	0.0001	0.0001	0.0308945	0.0001	0.0001	0.0001	0.0001	0.0001	0.0001	0.0001	0.0001	0.0001	0.0001	0.0001	0.0001	0.0001
6	4674350	4747208	-	ENSMUSG00000004631	protein_coding	ENSMUSG00000004631	Sgce	ensembl_havana	15	20.6011	26.5302	35.1891	40.9174	36.2478	47.5214	43.1432	48.2891	49.1284	59.3294	37.216	38.3243	27.8295	31.742	40.1655	41.5804	31.9614	37.8921	45.0634	54.4481
6	54039554	54301811	+	ENSMUSG00000004633	protein_coding	ENSMUSG00000004633	Chn2	ensembl_havana	17	30.7421	16.3064	20.5007	18.8089	23.4227	18.3467	27.0377	46.0215	35.5889	54.5151	14.8685	30.8117	18.7341	17.1318	17.181	9.29755	28.5348	23.4681	19.7462	15.0192
8	114439655	115352709	+	ENSMUSG00000004637	protein_coding	ENSMUSG00000004637	Wwox	ensembl_havana	15	16.6298	14.1711	9.00268	6.53368	8.74139	7.71146	13.211	11.6572	9.58534	8.67294	11.9666	7.87675	22.2637	16.0935	13.8367	11.8433	9.47012	8.41689	10.45	10.1994
5	33634952	33652575	-	ENSMUSG00000004642	protein_coding	ENSMUSG00000004642	Slbp	ensembl_havana	13	76.7309	72.1167	94.3534	147.764	67.2979	64.4542	61.6507	57.998	72.7277	107.756	64.9185	66.3559	53.0457	57.5879	64.4287	68.3659	72.8009	63.5386	69.3917	71.1775
7	87424771	87493513	-	ENSMUSG00000004651	protein_coding	ENSMUSG00000004651	Tyr	ensembl_havana	6	0.0001	0.0001	0.0001	0.0001	0.0001	0.0001	0.0001	0.0001	0.0001	0.0354994	0.0001	0.0001	0.0001	0.0001	0.0001	0.0001	0.0001	0.0001	0.0001	0.0311954
6	55376295	55388531	+	ENSMUSG00000004654	protein_coding	ENSMUSG00000004654	Ghrhr	ensembl_havana	6	0.0001	0.0001	0.0001	0.0001	0.0001	0.0001	0.0001	0.0001	0.0001	0.0001	0.0001	0.0001	0.0001	0.0001	0.0001	0.0001	0.0001	0.0001	0.0001	0.0001
6	55336432	55348556	+	ENSMUSG00000004655	protein_coding	ENSMUSG00000004655	Aqp1	ensembl_havana	5	1.87937	2.49134	0.568684	1.485	0.405102	0.642714	0.308045	2.13989	0.379713	1.48687	0.179598	0.463432	0.712805	0.852978	0.196828	3.13615	0.311614	0.231149	0.13196	1.21282
9	57790353	57836794	-	ENSMUSG00000004661	protein_coding	ENSMUSG00000004661	Arid3b	ensembl_havana	15	0.886546	3.88255	4.13813	9.70147	2.32886	6.36198	5.29676	12.6472	2.78393	7.25697	5.59445	11.7158	3.25818	4.00492	4.22976	10.0723	2.67912	4.91814	4.64818	23.0107
10	79988584	79996063	+	ENSMUSG00000004665	protein_coding	ENSMUSG00000004665	Cnn2	ensembl_havana	10	263.913	263.295	823.72	467.151	288.496	288.951	369.319	514.316	462.243	489.609	525.54	514.994	181.299	252.304	591.497	559.766	240.271	118.528	732.089	726.42
10	80035949	80039796	-	ENSMUSG00000004667	protein_coding	ENSMUSG00000004667	Polr2e	ensembl_havana	18	205.337	215.088	154.402	157.433	125.618	131.061	137.221	138.735	161.019	158.483	178.81	188.411	235.43	241.068	137.972	150.309	129.434	136.847	143.662	124.475
11	9191942	9684260	+	ENSMUSG00000004668	protein_coding	ENSMUSG00000004668	Abca13	ensembl_havana	14	0.0001	0.0001	0.063276	0.132091	0.337601	0.0643614	0.0308945	0.0320371	0.379713	0.0708987	0.299263	0.0662903	0.0001	0.0001	0.426345	0.0369947	0.21816	0.132128	0.626437	0.0311954
8	71272714	71360714	+	ENSMUSG00000004677	protein_coding	ENSMUSG00000004677	Myo9b	ensembl_havana	17	116.16	123.98	119.087	138.327	121.028	128.041	139.007	120.946	127.329	125.066	111.109	112.722	114.712	121.665	172.662	158.204	129.091	109.484	134.696	130.632
12	34047580	34917096	-	ENSMUSG00000004698	protein_coding	ENSMUSG00000004698	Hdac9	ensembl_havana	10	0.0710157	3.07371	0.221216	10.3944	0.405102	27.1827	0.215662	14.4357	0.253176	11.1509	0.448844	15.952	0.950374	2.07667	0.16404	6.60424	0.187008	4.42304	0.296786	13.5266
1	171588624	171607411	-	ENSMUSG00000004707	protein_coding	ENSMUSG00000004707	Ly9	ensembl_havana	14	6.41797	8.50914	2.3692	3.29989	26.089	29.8816	12.3179	4.66292	20.9737	24.3903	8.79549	7.84365	5.26054	12.2	0.262405	0.147679	16.8842	10.5953	15.7904	23.6326
1	171559193	171609747	+	ENSMUSG00000004709	protein_coding	ENSMUSG00000004709	Cd244a	ensembl_havana	14	0.0001	0.0324538	0.0001	0.0001	0.10135	0.0643614	0.0001	0.0001	0.0633689	0.0354994	0.119765	0.0001	0.0340383	0.259672	0.0001	0.0001	0.249311	0.165135	0.13196	0.186672
17	57358691	57483528	+	ENSMUSG00000004730	protein_coding	ENSMUSG00000004730	Adgre1	ensembl_havana	15	0.0355578	0.0001	0.0001	0.0001	0.0001	0.0001	0.0001	0.0001	0.0001	0.0001	0.0001	0.0001	0.0001	0.0001	0.0001	0.0001	0.0001	0.0001	0.0660302	0.0001
11	4091480	4095446	-	ENSMUSG00000004748	protein_coding	ENSMUSG00000004748	Mtfp1	ensembl_havana	5	6.70163	10.2886	4.23289	7.22663	7.15513	6.74754	9.45402	7.2179	5.31469	4.88521	6.01328	6.22199	6.21082	6.97145	7.63972	4.87019	9.43897	7.42668	5.07673	5.87713
1	33719887	33742565	+	ENSMUSG00000004768	protein_coding	ENSMUSG00000004768	Rab23	ensembl_havana	14	43.0814	37.0775	41.6015	37.4197	35.7415	29.9459	33.3814	35.5781	38.7207	44.9219	44.4557	42.5936	41.7443	38.3796	34.4931	40.5842	35.9176	35.2516	42.2614	39.3358
9	64715299	64737759	-	ENSMUSG00000004771	protein_coding	ENSMUSG00000004771	Rab11a	ensembl_havana	12	60.3848	70.499	62.9866	85.2006	60.2104	67.9565	73.5374	68.2178	55.74	58.6568	71.5	72.8425	62.7521	80.2078	69.4452	73.568	59.6862	68.1596	75.2265	79.8842
12	85219481	85226629	+	ENSMUSG00000004788	protein_coding	ENSMUSG00000004788	Eif2b2	ensembl_havana	11	43.2232	43.9689	65.0714	60.5512	48.9716	54.1724	35.5986	51.8341	59.8525	71.9316	56.3026	59.1081	47.7513	52.2853	66.0353	67.0377	51.0884	53.3064	38.2726	37.6255
12	85110833	85134846	+	ENSMUSG00000004789	protein_coding	ENSMUSG00000004789	Dlst	ensembl_havana	10	154.738	157.984	219.221	227.058	166.456	206.633	128.629	174.92	178.925	198.52	205.016	234.016	210.961	213.108	271.223	266.896	156.069	155.364	140.728	145.558
12	85166635	85177791	-	ENSMUSG00000004791	protein_coding	ENSMUSG00000004791	Pgf	ensembl_havana	7	0.248305	0.453053	10.361	2.01297	0.877604	1.09254	0.585196	1.24565	1.8349	1.16828	0.448844	0.463432	0.780682	0.89006	1.54114	0.369047	0.373917	0.792268	1.94504	1.05734
11	61775649	61855074	-	ENSMUSG00000004798	protein_coding	ENSMUSG00000004798	Ulk2	ensembl_havana	14	22.4804	25.4625	22.3012	33.3279	27.8777	41.2559	29.9632	31.7776	34.9245	26.1602	31.2626	26.4762	33.7348	30.3329	29.0503	34.4597	18.909	17.3618	27.9216	30.8778
5	135569937	135573050	-	ENSMUSG00000004814	protein_coding	ENSMUSG00000004814	Ccl24	ensembl_havana	10	0.0001	0.0001	0.0001	0.0001	0.0001	0.0001	0.0308945	0.0001	0.0001	0.0001	0.0001	0.0001	0.0001	0.0001	0.0328881	0.0001	0.0001	0.0001	0.0001	0.0001
5	108646693	108669673	-	ENSMUSG00000004815	protein_coding	ENSMUSG00000004815	Dgkq	ensembl_havana	12	20.7075	26.4008	24.923	35.7038	19.0689	25.1584	22.2645	23.921	10.4711	12.6731	24.8905	26.6748	19.311	23.9549	20.0008	30.1061	17.7564	22.8079	22.4493	33.0545
5	108777235	108795364	-	ENSMUSG00000004821	protein_coding	ENSMUSG00000004821	Tmed11	ensembl_havana	1	0.0001	0.0001	0.0001	0.0001	0.0001	0.0001	0.0001	0.0001	0.0001	0.0001	0.0001	0.0001	0.0001	0.0001	0.0001	0.0001	0.0001	0.0001	0.0001	0.0001
11	61653265	61672785	+	ENSMUSG00000004837	protein_coding	ENSMUSG00000004837	Grap	ensembl_havana	2	0.567426	0.420699	0.126452	0.660057	0.236351	0.48206	0.400429	0.0959114	0.379713	0.354094	0.119765	0.198671	0.135853	0.296753	0.655861	0.627309	0.187008	0.33017	0.395681	0.80858
16	65520511	65535006	+	ENSMUSG00000004842	protein_coding	ENSMUSG00000004842	Pou1f1	ensembl_havana	18	0.0001	0.0001	0.0001	0.0001	0.0001	0.0001	0.0001	0.0001	0.0001	0.0001	0.0001	0.0001	0.0001	0.0001	0.0001	0.0001	0.0001	0.0001	0.0001	0.0001
16	65539128	65562727	-	ENSMUSG00000004843	protein_coding	ENSMUSG00000004843	Chmp2b	ensembl_havana	7	53.8251	66.7136	59.6382	90.9422	51.5028	76.3426	63.0057	108.427	60.8015	102.764	53.4605	92.0377	40.251	58.7375	67.937	78.3274	38.0982	68.1596	69.985	81.9365
5	136987019	136996649	+	ENSMUSG00000004846	protein_coding	ENSMUSG00000004846	Plod3	ensembl_havana	10	157.114	170.44	175.535	149.744	162.845	138.997	191.634	188.11	151.561	135.792	142.641	156.044	105.413	120.59	162.465	148.243	160.056	131.401	191.956	214.092
5	137034993	137046136	-	ENSMUSG00000004849	protein_coding	ENSMUSG00000004849	Ap1s1	ensembl_havana	14	144.42	123.43	157.403	128.923	133.684	123.028	135.773	135.701	123.406	116.004	127.803	139.893	101.272	97.3766	162.76	146.988	148.623	127.935	167.298	163.811
17	28769297	28780234	+	ENSMUSG00000004864	protein_coding	ENSMUSG00000004864	Mapk13	ensembl_havana	13	0.106474	0.0324538	0.47392	0.132091	1.21511	0.321407	0.277251	0.127849	1.77163	0.283295	0.359096	0.231766	0.101915	0.0742633	0.295193	0.110784	1.99379	0.528212	0.329751	0.0311954
17	28587648	28622710	-	ENSMUSG00000004865	protein_coding	ENSMUSG00000004865	Srpk1	ensembl_havana	16	187.714	184.32	168.933	176.011	173.476	161.971	153.388	140.46	154.123	171.014	182.489	191.952	174.749	198.09	172.498	179.751	198.092	176.092	162.617	170.185
1	78101267	78197135	-	ENSMUSG00000004872	protein_coding	ENSMUSG00000004872	Pax3	ensembl_havana	15	2.73035	0.647175	7.39169	0.726053	0.0338501	0.0322307	0.369634	1.46921	0.696058	0.56649	15.2275	3.27652	19.6165	3.85659	0.131252	0.110784	0.124706	0.066114	0.329751	0.248863
1	181815335	181843047	-	ENSMUSG00000004880	protein_coding	ENSMUSG00000004880	Lbr	ensembl_havana	11	156.015	153.875	122.277	132.882	103.377	105.292	91.1827	83.899	109.898	101.879	131.602	125.762	153.944	139.205	124.562	124.483	110.151	96.0175	98.0054	108.927
3	87948666	87953377	+	ENSMUSG00000004885	protein_coding	ENSMUSG00000004885	Crabp2	ensembl_havana	5	0.461052	0.970713	0.568684	0.231085	0.843854	0.578452	1.81698	0.862403	2.72066	1.20368	0.688175	0.695098	2.20609	0.185508	0.623073	0.442836	0.996944	0.858282	0.494577	0.74639
3	87971078	87980452	+	ENSMUSG00000004891	protein_coding	ENSMUSG00000004891	Nes	ensembl_havana	16	269.834	145.592	366.01	188.517	127.171	119.462	168.231	132.475	197.02	95.7554	172.198	177.787	27.4562	76.3142	450.738	370.681	90.2457	36.8029	318.245	335.519
3	87987531	88000231	-	ENSMUSG00000004892	protein_coding	ENSMUSG00000004892	Bcan	ensembl_havana	13	0.106474	0.194223	0.031688	0.0660957	0.0676003	0.128623	0.462018	0.127849	0.0633689	0.177097	0.209514	0.165576	0.0340383	0.0001	0.0328881	0.147679	0.0001	0.066114	0.197891	0.155577
3	88021750	88027584	-	ENSMUSG00000004894	protein_coding	ENSMUSG00000004894	Hapln2	ensembl_havana	10	0.0001	0.0324538	0.0001	0.0001	0.0001	0.0001	0.0001	0.0320371	0.0001	0.0708987	0.0001	0.0001	0.0001	0.0001	0.0001	0.0001	0.0312514	0.0001	0.0001	0.0001
3	87858903	87885609	-	ENSMUSG00000004895	protein_coding	ENSMUSG00000004895	Prcc	ensembl_havana	9	100.133	87.7759	65.0082	72.1334	71.0779	73.5794	70.6428	71.3477	66.2743	61.8782	68.0298	68.9373	83.6581	87.4758	65.6746	72.9777	68.5332	77.0054	68.6005	78.3916
3	87922601	87930718	-	ENSMUSG00000004896	protein_coding	ENSMUSG00000004896	Rrnad1	ensembl_havana	16	30.0684	30.6715	16.1416	19.4688	19.7102	21.2385	16.8447	18.875	16.2602	15.5404	26.835	24.2589	36.925	34.9681	17.6729	24.6457	20.7469	23.138	18.2628	21.2694
3	87906321	87916133	+	ENSMUSG00000004897	protein_coding	ENSMUSG00000004897	Hdgf	ensembl_havana	16	1337.79	1130.18	825.931	803.498	638.317	700.513	637.478	642.288	654.359	686.535	846.751	859.713	1026.02	1009.81	860.523	946.422	706.669	723.778	724.738	784.226
6	120773578	120794337	+	ENSMUSG00000004902	protein_coding	ENSMUSG00000004902	Slc25a18	ensembl_havana	7	0.0001	0.0001	0.031688	0.0001	0.0676003	0.0001	0.0001	0.0320371	0.0001	0.0001	0.0300163	0.0001	0.0001	0.0001	0.0001	0.0738893	0.0001	0.132128	0.0001	0.0001
10	81070035	81082560	+	ENSMUSG00000004929	protein_coding	ENSMUSG00000004929	Thop1	ensembl_havana	12	235.547	236.636	128.942	146.346	116.877	124.988	114.34	141.737	117.332	135.084	186.528	194.202	303.986	317.753	141.284	161.968	115.541	107.9	106.741	130.01
10	81266960	81273247	+	ENSMUSG00000004931	protein_coding	ENSMUSG00000004931	Apba3	ensembl_havana	11	39.9611	49.2749	30.4509	36.0338	30.3077	35.9543	43.8823	43.8498	42.7699	44.0015	42.4812	41.7993	53.453	49.6525	32.034	40.7318	20.155	28.7162	34.9102	40.4863
10	81252935	81263366	+	ENSMUSG00000004933	protein_coding	ENSMUSG00000004933	Matk	ensembl_havana	17	0.0001	0.0971613	0.094864	0.46207	0.0338501	0.899759	0.154073	1.18177	0.158272	0.283295	0.149681	0.463432	0.271607	1.4092	0.131252	0.258363	0.0001	0.132128	0.329751	0.155577
10	81153266	81167924	-	ENSMUSG00000004934	protein_coding	ENSMUSG00000004934	Pias4	ensembl_havana	14	34.4297	38.3717	35.0944	40.1585	31.0502	32.4842	40.3101	39.7618	45.0792	45.9131	40.058	42.064	51.9936	45.6476	39.313	43.0562	25.0458	32.743	39.2286	48.6644
9	64185770	64253632	-	ENSMUSG00000004936	protein_coding	ENSMUSG00000004936	Map2k1	ensembl_havana	8	100.842	98.582	111.758	117.703	114.683	114.225	147.383	114.239	112.239	104.074	131.662	119.275	120.617	111.431	105.742	103.969	108.251	117.604	115.675	123.045
10	81044075	81060182	-	ENSMUSG00000004937	protein_coding	ENSMUSG00000004937	Sgta	ensembl_havana	6	212.499	201.338	185.011	185.349	146.746	155.866	182.458	193.316	207.459	209.069	204.269	201.616	242.557	245.036	173.678	178.054	143.857	167.709	173.1	170.9
10	81198170	81202052	-	ENSMUSG00000004939	protein_coding	ENSMUSG00000004939	Nmrk2	ensembl_havana	7	0.0001	0.0001	0.0001	0.0001	0.0001	0.0001	0.0001	0.0001	0.0001	0.0001	0.0001	0.0001	0.0001	0.0001	0.0001	0.0001	0.0001	0.0001	0.0001	0.0001
17	5410870	5440260	-	ENSMUSG00000004945	protein_coding	ENSMUSG00000004945	Tmem242	ensembl_havana	15	35.7062	38.0481	48.5193	53.5556	47.0478	49.4814	40.4333	51.7383	53.2093	83.224	53.3708	55.6662	64.8563	57.3284	52.7889	55.9324	47.506	59.1817	41.7669	42.01
5	135994800	136032873	+	ENSMUSG00000004947	protein_coding	ENSMUSG00000004947	Dtx2	ensembl_havana	15	32.1958	25.0419	44.7603	47.55	84.9492	58.735	92.0142	43.243	86.1724	58.94	60.6105	34.6838	48.0568	25.5123	54.6578	30.4382	99.9026	88.8219	61.8097	34.3605
5	135980099	135988625	+	ENSMUSG00000004948	protein_coding	ENSMUSG00000004948	Zp3	ensembl_havana	12	0.0355578	0.0001	0.0001	0.0001	0.10135	0.0643614	0.154073	0.0320371	0.0950034	0.0354994	0.0300163	0.0001	0.101915	0.0371817	0.0328881	0.0001	0.187008	0.066114	0.0660302	0.0001
5	135887919	135889564	+	ENSMUSG00000004951	protein_coding	ENSMUSG00000004951	Hspb1	ensembl_havana	10	15.247	32.6774	17.7841	16.1361	71.9892	42.1556	49.8872	60.9681	92.9421	90.9764	37.7245	35.081	6.75383	9.34468	88.9869	81.648	53.2378	40.9618	61.48	118.785
5	136083916	136111861	+	ENSMUSG00000004952	protein_coding	ENSMUSG00000004952	Rasa4	ensembl_havana	13	3.40405	2.55605	2.77984	0.825046	1.0126	1.28533	0.585196	1.50115	1.36038	1.80547	1.85491	1.58867	2.98667	3.0408	1.73787	2.02931	0.623128	1.55143	2.34062	1.83473
7	4539765	4547542	-	ENSMUSG00000004961	protein_coding	ENSMUSG00000004961	Syt5	ensembl_havana	7	0.0355578	0.226576	0.063276	0.0330979	0.0676003	0.0643614	0.0308945	0.0959114	0.0950034	0.177097	0.209514	0.132481	0.509175	0.556325	0.16404	0.0738893	0.249311	1.35339	0.0001	0.0001
6	51460932	51469895	-	ENSMUSG00000004980	protein_coding	ENSMUSG00000004980	Hnrnpa2b1	ensembl_havana	16	1699.99	1688.9	1574.25	1520.21	1508.56	1797	1498.52	1451.8	1378.47	1427.62	1856.93	1756.06	1655.27	1733.23	1389.46	1622.33	1670.52	1499.01	1417.4	1506.54
6	117933559	117937693	-	ENSMUSG00000004988	protein_coding	ENSMUSG00000004988	Fxyd4	ensembl_havana	9	0.0001	0.0001	0.0001	0.0001	0.0001	0.0001	0.0001	0.0001	0.0001	0.0001	0.0001	0.0001	0.0001	0.0001	0.0001	0.0001	0.0001	0.0001	0.0001	0.0001
8	84257795	84270381	-	ENSMUSG00000004994	protein_coding	ENSMUSG00000004994	Ccdc130	ensembl_havana	12	8.08449	7.79736	11.1191	9.43749	11.8464	10.7317	10.1623	9.83674	13.8244	14.7616	12.8342	12.4439	11.641	11.1246	16.0663	11.3637	15.42	12.7738	11.9005	11.2255
8	84249906	84257327	-	ENSMUSG00000004996	protein_coding	ENSMUSG00000004996	Mri1	ensembl_havana	9	32.7632	32.9362	31.367	34.9778	41.5465	40.1313	32.9195	29.0948	30.6855	32.9569	32.4593	27.1712	50.127	42.4957	43.641	43.1299	46.2288	46.804	30.6577	29.634
3	146729574	146812991	-	ENSMUSG00000005034	protein_coding	ENSMUSG00000005034	Prkacb	ensembl_havana	15	153.639	144.492	99.5339	116.846	111.139	112.425	97.6803	114.271	103.856	96.251	103.391	97.0351	129.068	140.725	90.0361	115.443	105.043	110.177	107.4	126.185
11	119343425	119355537	-	ENSMUSG00000005043	protein_coding	ENSMUSG00000005043	Sgsh	ensembl_havana	13	6.48889	8.86503	14.6885	24.6825	36.889	35.8901	30.1479	22.9629	29.8947	25.6646	27.2239	17.8384	16.4602	13.4237	25.3781	17.9309	32.7091	41.985	29.7346	17.7867
4	152338651	152390195	+	ENSMUSG00000005045	protein_coding	ENSMUSG00000005045	Chd5	ensembl_havana	16	0.886546	0.77659	0.31598	0.396074	0.202601	0.417799	1.04711	0.543032	2.49922	1.55767	0.748007	0.496527	0.712805	0.370917	0.754226	0.848677	0.155857	0.363177	0.791263	0.684199
10	78425669	78427623	+	ENSMUSG00000005054	protein_coding	ENSMUSG00000005054	Cstb	ensembl_havana	7	74.7807	80.4316	95.2063	74.2453	76.6467	74.9289	101.468	73.4236	124.956	95.5784	87.2061	82.5725	68.4537	60.814	115.48	74.3059	75.5734	67.0373	144.255	96.0538
5	136218147	136246557	-	ENSMUSG00000005057	protein_coding	ENSMUSG00000005057	Sh2b2	ensembl_havana	13	6.70163	10.0945	3.66431	4.75179	5.23137	4.98036	2.34048	4.40743	3.51152	3.04444	6.49194	5.36152	9.63859	8.38056	1.86902	4.31677	3.73827	3.00374	3.52737	2.42554
6	124396816	124415068	-	ENSMUSG00000005069	protein_coding	ENSMUSG00000005069	Pex5	ensembl_havana	12	76.8727	80.3345	64.2185	80.2509	80.2242	86.7208	76.4321	70.166	81.0792	78.2681	71.8291	81.7451	99.2019	91.8885	63.0516	73.4942	72.0221	89.8782	79.0504	71.675
12	72085589	72101462	+	ENSMUSG00000005078	protein_coding	ENSMUSG00000005078	Jkamp	ensembl_havana	16	12.7295	16.5652	19.6162	26.7944	22.4777	29.3675	15.305	23.0268	22.1126	25.5584	21.5997	17.7722	30.1713	25.7348	25.0174	28.1507	20.3731	22.3128	14.7685	17.258
2	102811141	102901666	-	ENSMUSG00000005087	protein_coding	ENSMUSG00000005087	Cd44	ensembl_havana	17	302.101	174.905	392.323	128.329	69.1204	57.2248	125.919	117.273	111.828	93.9146	156.941	151.708	122.008	140.948	218.074	184.068	59.9354	36.1098	334.464	206.816
2	102658659	102790785	+	ENSMUSG00000005089	protein_coding	ENSMUSG00000005089	Slc1a2	ensembl_havana	15	0.283763	0.388345	0.726624	2.04597	1.14761	0.996151	2.21731	0.958214	1.64509	2.05326	0.508677	0.264861	0.373422	0.519243	0.360769	0.295257	1.61997	4.91814	1.78022	0.311054
2	118388618	118475235	+	ENSMUSG00000005102	protein_coding	ENSMUSG00000005102	Eif2ak4	ensembl_havana	13	48.5774	59.8222	54.1735	53.0936	45.6303	52.8872	49.6101	56.465	57.5432	58.586	48.4047	47.0283	55.0481	57.8846	46.4608	56.5227	40.1854	41.5229	49.184	64.7718
5	38526813	38563222	-	ENSMUSG00000005103	protein_coding	ENSMUSG00000005103	Wdr1	ensembl_havana	12	391.845	278.145	781.771	531.695	421.809	300.743	473.774	416.716	469.55	434.35	503.162	464.855	185.168	187.003	551.004	463.36	461.882	271.285	637.15	552.254
5	38349273	38503144	-	ENSMUSG00000005107	protein_coding	ENSMUSG00000005107	Slc2a9	ensembl_havana	13	0.212847	1.94133	0.379156	0.165089	0.168851	0.899759	0.33884	0.798529	0.253176	0.637288	0.389012	0.662003	0.441298	1.11255	0.557497	0.737993	0.280462	0.165135	0.428646	1.39939
15	66891320	66923202	+	ENSMUSG00000005124	protein_coding	ENSMUSG00000005124	Ccn4	ensembl_havana	10	176.58	68.4607	232.077	87.2134	237.567	81.4514	227.233	119.413	224.889	105.667	178.182	85.882	99.1001	41.4574	112.463	35.9355	259.491	84.498	199.966	59.1125
15	66929318	66969641	-	ENSMUSG00000005125	protein_coding	ENSMUSG00000005125	Ndrg1	ensembl_havana	13	52.9032	22.6477	26.155	37.7826	41.2428	30.8777	32.6423	33.1509	108.253	61.1348	33.5363	14.5951	80.943	21.73	40.0999	9.44513	31.8991	26.1416	38.9319	10.5414
9	53402325	53434403	+	ENSMUSG00000005131	protein_coding	ENSMUSG00000005131	4930550C14Rik	ensembl_havana	4	0.851088	1.87662	0.442332	1.02303	0.0001	0.44993	0.246456	0.67078	0.348079	1.02668	1.13692	0.926764	3.42787	3.26329	0.360769	0.442836	0.21816	0.132128	0.560507	0.901867
8	85083270	85098283	+	ENSMUSG00000005142	protein_coding	ENSMUSG00000005142	Man2b1	ensembl_havana	10	74.568	84.6699	47.8559	70.2525	82.3505	84.2146	100.298	99.1011	91.6451	95.543	59.4139	51.1983	100.084	88.8107	94.0035	82.0538	70.5268	96.7436	68.5016	83.0559
14	99298691	99315037	+	ENSMUSG00000005148	protein_coding	ENSMUSG00000005148	Klf5	ensembl_havana	8	23.2959	19.3477	43.3388	43.3923	15.5927	58.5422	21.8334	58.1896	22.4922	37.488	26.7154	41.9648	10.487	13.6091	46.7559	40.5842	18.4106	18.22	44.6678	40.3619
8	85075035	85081307	-	ENSMUSG00000005150	protein_coding	ENSMUSG00000005150	Wdr83	ensembl_havana	16	25.3879	33.098	21.0377	25.5074	21.4652	26.9256	20.1705	25.5179	26.4465	27.293	23.3647	20.7177	36.6196	36.1918	25.4109	29.2207	28.5971	30.5316	18.3617	19.1238
8	84969587	84974835	+	ENSMUSG00000005161	protein_coding	ENSMUSG00000005161	Prdx2	ensembl_havana	15	214.485	264.169	242.185	288.533	372.568	310.158	255.164	274.883	265.318	306.205	281.662	260.393	268.147	330.991	321.553	294.751	486.18	394.83	259.172	213.501
11	69733997	69758638	-	ENSMUSG00000005198	protein_coding	ENSMUSG00000005198	Polr2a	ensembl_havana	15	508.359	535.487	545.493	510.543	518.47	569.259	508.387	573.112	567.048	674.145	570.085	533.461	725.738	672.254	534.741	569.69	474.623	600.959	477.829	497.9
11	69614804	69617906	-	ENSMUSG00000005202	protein_coding	ENSMUSG00000005202	Shbg	ensembl_havana	2	0.0001	0.0001	0.0001	0.0001	0.0338501	0.0643614	0.0308945	0.0001	0.0001	0.0708987	0.0001	0.0001	0.0679767	0.0371817	0.0001	0.0001	0.0312514	0.099121	0.0330651	0.0311954
11	69673115	69682085	-	ENSMUSG00000005204	protein_coding	ENSMUSG00000005204	Senp3	ensembl_havana	12	228.384	227.124	207.691	194.324	229.332	201.267	229.789	200.693	214.007	216.644	243.967	232.262	199.727	228.905	192.761	207.754	246.688	250.853	214.702	214.931
5	72300025	72504474	-	ENSMUSG00000005220	protein_coding	ENSMUSG00000005220	Corin	ensembl_havana	10	0.0001	1.45602	0.252804	7.6886	0.135101	5.39805	0.523607	40.0812	0.506251	30.3373	0.0300163	13.4698	0.0001	1.11255	0.0001	1.54968	0.187008	1.15535	0.0330651	15.2679
6	54595111	54645840	+	ENSMUSG00000005225	protein_coding	ENSMUSG00000005225	Plekha8	ensembl_havana	15	15.8498	12.0033	22.9646	22.7026	26.359	18.411	28.4235	19.0346	26.6363	21.0273	30.3951	20.8831	28.4744	15.2777	26.1322	22.5796	26.7591	22.874	25.4821	18.6884
2	69211073	69227842	+	ENSMUSG00000005232	protein_coding	ENSMUSG00000005232	G6pc2	ensembl_havana	11	0.0001	0.0001	0.031688	0.0001	0.10135	0.0001	0.0924836	0.0001	0.0317345	0.106298	0.149681	0.0001	0.0340383	0.0001	0.0001	0.0001	0.0001	0.0001	0.0330651	0.0001
2	69193895	69206195	-	ENSMUSG00000005233	protein_coding	ENSMUSG00000005233	Spc25	ensembl_havana	16	46.9463	49.8249	55.4686	46.0651	54.9116	50.381	46.9926	41.5823	41.5361	44.2139	44.7848	38.1257	37.8074	43.1261	52.7561	46.8932	65.7918	45.0877	46.349	49.4107
11	69420809	69549111	-	ENSMUSG00000005237	protein_coding	ENSMUSG00000005237	Dnah2	ensembl_havana	14	0.106474	0.161869	0.126452	0.231085	0.0676003	0.128623	0.0308945	0.127849	0.158272	0.389493	0.179598	0.231766	0.373422	0.148427	0.0001	0.0738893	0.0935542	0.165135	0.0989953	0.155577
16	97741933	97763788	-	ENSMUSG00000005251	protein_coding	ENSMUSG00000005251	Ripk4	ensembl_havana	15	1.02838	1.65014	2.74826	6.43468	3.44262	3.82365	0.646785	1.78858	1.39202	3.11524	0.867673	3.67366	1.28976	5.30278	4.1314	10.3675	4.45475	5.51227	1.12091	5.62837
16	18811779	18835262	+	ENSMUSG00000005262	protein_coding	ENSMUSG00000005262	Ufd1	ensembl_havana	13	89.3184	90.1701	76.5378	77.6111	68.2766	77.3708	76.8325	83.5157	72.4746	81.4894	67.6408	76.2844	54.539	70.5665	78.1669	89.9493	57.8794	80.9333	80.6657	108.554
11	62700356	62731906	-	ENSMUSG00000005267	protein_coding	ENSMUSG00000005267	Zfp287	ensembl_havana	13	6.09885	8.99445	5.81229	5.97271	3.07136	4.27348	4.5269	7.05821	4.42892	5.2746	7.26976	8.00913	3.73332	6.45231	5.83638	6.78872	2.83488	3.96094	6.65905	9.01777
15	10177238	10349181	+	ENSMUSG00000005268	protein_coding	ENSMUSG00000005268	Prlr	ensembl_havana	20	0.0355578	0.0001	0.15804	0.0001	0.0338501	0.0001	0.0001	0.0001	0.0317345	0.0354994	0.0001	0.0001	0.0001	0.0001	0.0001	0.0001	0.0001	0.0001	0.0330651	0.0311954
5	33739673	33782818	-	ENSMUSG00000005299	protein_coding	ENSMUSG00000005299	Letm1	ensembl_havana	6	82.1559	70.3372	106.894	151.196	69.2217	67.5067	80.6818	86.0068	105.406	144.536	78.4406	86.3123	34.0742	45.6476	93.3149	79.877	81.9282	66.1131	89.9949	85.5746
13	58176156	58215654	-	ENSMUSG00000005312	protein_coding	ENSMUSG00000005312	Ubqln1	ensembl_havana	15	342.736	284.357	295.537	265.798	247.152	231.694	288.329	247.896	231.628	194.272	245.074	254.899	221.176	226.94	293.486	277.854	223.947	191.606	280.929	280.356
13	55152640	55168760	+	ENSMUSG00000005320	protein_coding	ENSMUSG00000005320	Fgfr4	ensembl_havana	9	0.106474	0.161869	0.31598	0.0001	1.04635	0.128623	0.462018	0.415283	1.74	2.93825	3.97897	5.06366	0.0340383	0.0001	0.262405	0.221468	1.33961	1.05632	0.527542	0.497626
1	173333258	173367696	-	ENSMUSG00000005338	protein_coding	ENSMUSG00000005338	Cadm3	ensembl_havana	13	0.0355578	0.0971613	0.379156	0.92404	28.654	2.15286	8.06827	1.62889	29.9263	8.07115	1.76516	0.496527	5.46417	5.15445	0.131252	0.0369947	20.3108	2.60765	0.13196	0.0622908
1	173221284	173227215	-	ENSMUSG00000005339	protein_coding	ENSMUSG00000005339	Fcer1a	ensembl_havana	10	0.0001	0.0001	0.0001	0.0001	0.0001	0.0001	0.0001	0.0001	0.0001	0.0001	0.0001	0.0001	0.0001	0.0001	0.0001	0.0001	0.0001	0.0001	0.0001	0.0001
15	77915047	77929007	-	ENSMUSG00000005354	protein_coding	ENSMUSG00000005354	Txn2	ensembl_havana	16	231.965	247.345	172.186	173.734	174.691	171.61	146.828	161.953	181.835	214.662	181.532	209.956	181.468	207.806	197.122	180.747	206.658	213.819	159.32	168.133
10	78711991	78718295	-	ENSMUSG00000005355	protein_coding	ENSMUSG00000005355	Casp14	ensembl_havana	9	0.0001	0.0324538	0.252804	0.297081	1.62011	0.578452	0.523607	0.415283	1.58182	0.424892	0.448844	0.297956	0.0001	0.0001	0.524709	0.221468	1.90033	0.429191	0.395681	0.124482
10	78780496	78814766	+	ENSMUSG00000005357	protein_coding	ENSMUSG00000005357	Slc1a6	ensembl_havana	9	0.283763	3.33254	3.44319	3.49787	6.61513	29.3997	26.4218	55.6985	22.1126	50.0194	8.10742	34.9486	0.0001	0.22259	1.80344	17.7095	2.74142	17.3948	18.4606	47.5761
15	8634124	8710765	-	ENSMUSG00000005360	protein_coding	ENSMUSG00000005360	Slc1a3	ensembl_havana	14	13.6514	0.873652	13.8041	5.37875	8.47139	1.70303	14.1656	4.15193	21.6064	9.23933	22.1382	2.84628	23.4515	5.859	3.93467	0.47973	10.1555	2.73968	11.5049	0.901867
6	106780201	106800078	-	ENSMUSG00000005362	protein_coding	ENSMUSG00000005362	Crbn	ensembl_havana	14	39.7483	38.7923	31.3986	44.1512	40.5678	51.0879	34.5516	45.9896	48.907	54.3735	40.1179	39.5157	52.0276	48.3546	30.3946	34.9024	36.6653	47.9263	36.5584	50.2192
6	106710357	106749038	-	ENSMUSG00000005364	protein_coding	ENSMUSG00000005364	Il5ra	ensembl_havana	11	0.0001	0.0001	0.0001	0.0330979	0.0001	0.0001	0.0616891	0.0001	0.0001	0.0354994	0.0001	0.0001	0.0001	0.0001	0.0001	0.0369947	0.0624028	0.0001	0.0330651	0.0001
17	87975062	87990893	+	ENSMUSG00000005370	protein_coding	ENSMUSG00000005370	Msh6	ensembl_havana	4	212.18	176.911	139.903	148.82	200.206	153.006	180.826	117.209	154.598	135.19	201.815	136.253	252.637	204.431	146.235	131.972	236.906	210.42	128.861	117.105
17	87990859	88065292	-	ENSMUSG00000005371	protein_coding	ENSMUSG00000005371	Fbxo11	ensembl_havana	15	101.41	95.7996	104.367	92.9881	90.5855	95.7495	103.685	98.4304	96.6434	95.8262	90.4969	83.5654	96.4189	96.3383	94.233	100.501	87.2863	94.1031	101.73	96.116
5	135089890	135138383	+	ENSMUSG00000005373	protein_coding	ENSMUSG00000005373	Mlxipl	ensembl_havana	13	0.0355578	0.129515	0.126452	0.0990936	2.16011	0.642714	0.923936	0.191723	1.13894	0.637288	0.418928	0.331052	1.49339	0.0742633	0.0656761	0.442836	1.58882	2.67367	0.329751	0.217768
5	135149657	135165761	+	ENSMUSG00000005374	protein_coding	ENSMUSG00000005374	Tbl2	ensembl_havana	13	60.3848	65.743	55.1527	46.7581	65.6104	46.0755	60.7577	56.9121	35.0511	36.3552	49.6611	54.8388	57.3898	57.5509	54.7234	50.7671	62.2094	59.3137	47.1402	49.1619
5	135052957	135064960	-	ENSMUSG00000005378	protein_coding	ENSMUSG00000005378	Bud23	ensembl_havana	17	60.5266	61.6987	58.7222	58.5383	62.6741	57.1285	53.8289	58.2854	33.1846	34.1605	56.1829	57.354	40.8279	54.1023	57.4776	60.9501	70.9007	63.9017	53.7003	52.0227
13	13437551	13512270	+	ENSMUSG00000005397	protein_coding	ENSMUSG00000005397	Nid1	ensembl_havana	8	288.379	371.13	892.519	904.141	302.536	322.367	411.507	885.489	502.45	711.456	174.711	257.216	182.453	236.322	1027.38	742.173	215.692	335.12	1015.62	1419.97
8	75109569	75128440	+	ENSMUSG00000005410	protein_coding	ENSMUSG00000005410	Mcm5	ensembl_havana	6	315.504	319.041	240.322	262.003	234.564	256.724	209.434	244.958	232.608	315.231	251.117	287.928	266.688	317.827	330.209	320.024	381.885	276.929	206.658	247.209
8	75093621	75100590	+	ENSMUSG00000005413	protein_coding	ENSMUSG00000005413	Hmox1	ensembl_havana	8	23.3668	32.5803	64.2501	44.0522	122.547	60.8877	217.964	95.1409	174.401	126.694	75.2097	72.4785	30.4089	24.1032	179.154	98.3981	229.866	244.186	130.278	107.621
11	59661305	59780861	+	ENSMUSG00000005417	protein_coding	ENSMUSG00000005417	Mprip	ensembl_havana	17	487.723	495.886	665.022	573.041	541.251	704.112	476.669	713.348	536.236	648.092	635.751	734.15	472.082	473.014	626.941	729.961	480.759	489.263	670.016	795.545
7	25267704	25294160	+	ENSMUSG00000005442	protein_coding	ENSMUSG00000005442	Cic	ensembl_havana	13	243.596	254.818	162.141	200.495	208.711	217.428	252.977	208.422	209.737	177.068	175.28	175.603	218.224	212.812	143.35	171.45	163.825	244.186	169.639	145.278
7	25295049	25297987	-	ENSMUSG00000005447	protein_coding	ENSMUSG00000005447	Pafah1b3	ensembl_havana	12	49.6056	46.1689	44.7603	56.1295	37.8678	41.288	47.67	46.2451	40.7769	29.1692	45.7122	30.7455	67.232	64.2997	45.2804	44.6426	35.2323	38.4863	56.3045	47.545
8	84030294	84042590	-	ENSMUSG00000005465	protein_coding	ENSMUSG00000005465	Il27ra	ensembl_havana	9	1.17021	2.29722	1.70585	1.32001	2.63261	1.92794	1.07791	1.43727	2.62576	3.36304	1.31642	0.628908	4.20845	2.92955	1.47556	1.99241	2.89718	2.01353	1.02202	0.901867
8	83972993	83996444	+	ENSMUSG00000005469	protein_coding	ENSMUSG00000005469	Prkaca	ensembl_havana	10	158.568	184.32	136.839	171.226	144.451	157.087	142.302	180.094	136.25	158.129	142.013	159.254	171.321	187.337	177.58	160.75	170.679	154.506	137.366	150.315
8	83955507	83970198	+	ENSMUSG00000005470	protein_coding	ENSMUSG00000005470	Asf1b	ensembl_havana	8	78.7165	80.1404	55.974	56.2944	58.6241	57.6425	50.7803	56.1137	52.6715	56.8869	61.6875	58.1483	62.0733	77.9087	77.7734	64.6395	78.3458	63.4066	56.3045	63.9322
5	136693146	136701095	+	ENSMUSG00000005474	protein_coding	ENSMUSG00000005474	Myl10	ensembl_havana	9	0.0001	0.0001	0.0001	0.0001	0.0001	0.0001	0.0001	0.0001	0.0001	0.0001	0.0001	0.0001	0.0001	0.0001	0.0328881	0.0001	0.0001	0.0001	0.0330651	0.0001
8	83715177	83726893	+	ENSMUSG00000005481	protein_coding	ENSMUSG00000005481	Ddx39	ensembl_havana	18	241.149	222.206	247.271	204.521	239.322	192.816	183.751	166.904	215.969	219.122	214.62	221.44	166.298	189.858	309.323	240.295	325.999	220.685	201.186	171.118
8	83608193	83612654	+	ENSMUSG00000005483	protein_coding	ENSMUSG00000005483	Dnajb1	ensembl_havana	10	51.6622	47.4307	64.029	65.8308	63.9904	60.1166	60.2342	63.4592	67.255	70.374	58.5164	65.5616	42.966	49.0221	70.3961	63.09	60.9634	53.0093	70.8751	60.1386
3	153857149	153906139	-	ENSMUSG00000005493	protein_coding	ENSMUSG00000005493	Msh4	ensembl_havana	15	0.0355578	0.0001	0.189628	0.0660957	0.135101	0.160753	0.0616891	0.127849	0.189907	0.177097	0.149681	0.0662903	0.135853	0.0371817	0.0001	0.0369947	0.155857	0.132128	0.0330651	0.186672
1	87945119	88008552	-	ENSMUSG00000005501	protein_coding	ENSMUSG00000005501	Usp40	ensembl_havana	14	37.7273	39.0187	40.7802	39.3995	49.1066	45.4971	42.2502	39.2189	40.9984	36.4614	43.7078	38.7214	65.3653	39.2696	45.805	44.7902	48.0355	47.5632	49.0852	54.5103
6	52313498	52318379	+	ENSMUSG00000005503	protein_coding	ENSMUSG00000005503	Evx1	ensembl_havana	8	0.0001	0.0001	0.0001	0.0001	0.0001	0.0001	0.0001	0.0001	0.0001	0.0001	0.0001	0.0001	0.0001	0.0001	0.0001	0.0001	0.0001	0.0001	0.0001	0.0001
2	90904740	90911627	+	ENSMUSG00000005505	protein_coding	ENSMUSG00000005505	Kbtbd4	ensembl_havana	12	30.0329	30.7362	31.4617	32.173	39.589	34.7334	32.8271	36.5681	32.4254	38.4792	32.19	30.4476	26.9811	29.8508	28.6569	30.6964	35.9488	43.4373	30.6577	28.4524
2	90940382	91019498	+	ENSMUSG00000005506	protein_coding	ENSMUSG00000005506	Celf1	ensembl_havana	16	374.08	349.712	340.045	304.9	298.486	277.673	282.909	277.055	279.522	283.23	296.171	303.648	241.709	261.352	296.24	298.699	315.19	288.019	293.093	333.84
2	90894634	90904828	-	ENSMUSG00000005510	protein_coding	ENSMUSG00000005510	Ndufs3	ensembl_havana	9	55.4207	57.6222	56.4478	54.6775	56.8691	59.4419	45.8839	53.1755	59.0616	69.7722	59.0848	60.0016	56.5414	58.7746	56.9202	54.1246	57.4744	63.6376	53.041	47.5761
5	135670033	135735327	+	ENSMUSG00000005514	protein_coding	ENSMUSG00000005514	Por	ensembl_havana	14	174.63	212.273	104.051	124.072	105.908	135.077	128.382	132.923	172.218	128.181	103.271	100.212	117.732	118.736	133.71	127.028	97.0055	136.253	105.455	109.332
7	67952827	68233669	+	ENSMUSG00000005533	protein_coding	ENSMUSG00000005533	Igf1r	ensembl_havana	10	107.154	150.283	175.313	236.562	133.853	204.64	113.078	256.232	143.905	210.768	112.306	183.182	152.417	157.671	169.023	203.179	134.979	162.395	173.627	233.495
8	3122061	3279618	-	ENSMUSG00000005534	protein_coding	ENSMUSG00000005534	Insr	ensembl_havana	10	30.352	44.9718	26.3445	41.7094	34.054	74.3505	22.7573	41.4545	50.7734	65.2765	29.4377	41.7662	53.3851	47.9467	30.9848	44.7533	26.3542	53.9996	25.647	57.3711
8	3681737	3694176	-	ENSMUSG00000005540	protein_coding	ENSMUSG00000005540	Fcer2a	ensembl_havana	10	0.0355578	0.0001	0.0001	0.0001	0.0001	0.0001	0.0001	0.0001	0.0317345	0.0708987	0.0001	0.0001	0.0001	0.0001	0.0001	0.0001	0.0001	0.0001	0.0001	0.0001
7	26835305	26843549	+	ENSMUSG00000005547	protein_coding	ENSMUSG00000005547	Cyp2a5	ensembl_havana	14	0.0001	0.0001	0.0001	0.0001	0.0001	0.0001	0.0001	0.0001	0.0001	0.0001	0.0001	0.0001	0.0001	0.0001	0.0001	0.0001	0.0001	0.0001	0.0001	0.0001
7	30712209	30725535	+	ENSMUSG00000005553	protein_coding	ENSMUSG00000005553	Atp4a	ensembl_havana	14	0.212847	0.51776	0.189628	0.297081	2.59886	0.867628	1.72459	0.574969	1.67673	1.55767	1.16684	0.794384	0.848559	0.741733	0.655861	0.55352	2.27415	1.65045	0.923123	0.964057
7	12999114	13031036	+	ENSMUSG00000005566	protein_coding	ENSMUSG00000005566	Trim28	ensembl_havana	14	732.63	765.846	611.165	728.032	585.464	642.164	612.719	666.72	603.934	607.064	601.348	646.746	557.607	615.593	633.498	759.329	547.579	588.383	579.23	691.126
7	13035120	13038276	-	ENSMUSG00000005575	protein_coding	ENSMUSG00000005575	Ube2m	ensembl_havana	16	124.067	133.524	131.343	146.94	94.0955	131.415	106.95	115.421	152.605	135.544	126.606	141.813	97.8783	101.789	133.448	134.961	95.2299	84.366	139.047	141.826
16	4287529	4420499	-	ENSMUSG00000005580	protein_coding	ENSMUSG00000005580	Adcy9	ensembl_havana	11	3.75863	6.17967	2.9062	6.86365	2.66636	10.1213	6.06662	9.10219	3.51152	4.81441	3.11139	4.63342	5.93931	5.22862	3.18054	1.58657	2.64797	3.86192	5.30748	4.63331
13	83504034	83667081	+	ENSMUSG00000005583	protein_coding	ENSMUSG00000005583	Mef2c	ensembl_havana	16	5.6379	19.6065	4.991	15.5421	9.55139	31.5846	12.3179	35.0671	7.90871	27.8594	12.1461	29.6203	21.2455	39.9	15.017	33.3898	10.2178	20.6955	14.241	30.5669
7	111028951	111056378	+	ENSMUSG00000005609	protein_coding	ENSMUSG00000005609	Ctr9	ensembl_havana	16	115.238	125.5	113.085	118.528	91.1592	187.547	119.267	280.057	132.264	194.874	110.062	156.639	107.483	127.746	124.791	147.136	85.168	109.121	123.389	160.981
7	111067750	111083031	-	ENSMUSG00000005610	protein_coding	ENSMUSG00000005610	Eif4g2	ensembl_havana	17	1581.7	1225.66	1869.6	1715.26	1333.23	1490.29	1512.72	1534.36	1657.46	1471.45	1425.81	1527.21	906.357	944.656	1839.61	1795.26	1363.81	1139.73	1602.34	1447.49
7	110868266	110982462	-	ENSMUSG00000005611	protein_coding	ENSMUSG00000005611	Mrvi1	ensembl_havana	15	1.45387	1.06777	3.44319	2.54093	4.08387	4.04857	4.5269	4.56711	7.02295	3.43384	7.50909	4.46795	5.43023	3.0408	24.2305	9.51892	0.841187	0.66024	24.2954	16.9471
16	32430921	32475071	+	ENSMUSG00000005615	protein_coding	ENSMUSG00000005615	Pcyt1a	ensembl_havana	15	75.2417	72.149	73.5685	84.1776	107.832	109.823	149.538	142.472	113.505	172.537	95.5527	140.191	52.8421	59.442	104.365	85.0054	84.14	159.457	120.685	156.379
7	80993681	81045165	+	ENSMUSG00000005621	protein_coding	ENSMUSG00000005621	Zfp592	ensembl_havana	11	58.3992	53.1573	50.0039	58.9013	41.5803	52.8551	46.1919	49.0875	45.269	43.9661	46.49	53.7135	47.0726	47.3534	50.756	55.8586	38.254	39.0474	55.0189	59.5167
3	95032694	95042615	-	ENSMUSG00000005625	protein_coding	ENSMUSG00000005625	Psmd4	ensembl_havana	15	323.943	286.331	202.163	212.539	217.385	200.785	238.688	202.194	216.253	216.007	241.425	227.298	235.973	239.696	188.597	220.999	234.913	273.133	234.052	249.043
3	95124476	95129210	+	ENSMUSG00000005628	protein_coding	ENSMUSG00000005628	Tmod4	ensembl_havana	12	1.38296	2.84723	0.189628	0.264083	0.607603	0.835498	0.308045	0.511094	0.822596	0.814285	2.03441	1.95271	2.00246	1.8171	0.0656761	0.147679	0.560825	0.99031	0.494577	1.08844
3	87796951	87816102	+	ENSMUSG00000005640	protein_coding	ENSMUSG00000005640	Insrr	ensembl_havana	11	0.0001	0.0001	0.031688	0.0001	0.10135	0.0001	0.0924836	0.0639743	0.158272	0.106298	0.0599326	0.0001	0.0001	0.0371817	0.0001	0.0001	0.654279	0.198142	0.0330651	0.0001
7	13398132	13408888	+	ENSMUSG00000005649	protein_coding	ENSMUSG00000005649	Cabp5	ensembl_havana	17	0.0001	0.0001	0.094864	0.0001	0.0001	0.0643614	0.0308945	0.0320371	0.0633689	0.141697	0.0300163	0.0331952	0.0001	0.0001	0.0001	0.0001	0.0312514	0.0001	0.0001	0.0622908
12	54746349	54795704	-	ENSMUSG00000005656	protein_coding	ENSMUSG00000005656	Snx6	ensembl_havana	9	105.452	115.891	91.5105	121.432	90.653	111.59	63.9911	99.644	98.5098	110.375	121.759	113.881	160.8	141.949	103.512	121.826	84.9499	113.676	53.4036	75.1266
6	83305691	83325909	-	ENSMUSG00000005667	protein_coding	ENSMUSG00000005667	Mthfd2	ensembl_havana	8	275.082	209.329	178.504	129.154	151.538	90.3516	169.031	109.353	149.916	108.889	201.427	173.187	126.929	138.611	198.368	166.137	195.755	116.812	160.507	151.683
5	75574916	75656723	+	ENSMUSG00000005672	protein_coding	ENSMUSG00000005672	Kit	ensembl_havana	12	1.06384	30.7685	0.505508	20.9207	4.15137	20.8208	0.462018	11.4336	2.27778	24.815	1.82499	35.8422	0.101915	24.1774	1.11489	23.9447	8.9717	30.8286	1.3187	9.17324
1	171216011	171222515	-	ENSMUSG00000005674	protein_coding	ENSMUSG00000005674	Tomm40l	ensembl_havana	9	47.3363	55.5192	38.5059	48.342	50.5916	47.8427	42.4966	50.9399	48.3059	57.0285	53.64	54.1769	70.5918	51.8032	53.3791	50.2875	53.7985	56.5411	45.9864	48.6333
1	171213970	171220702	+	ENSMUSG00000005677	protein_coding	ENSMUSG00000005677	Nr1i3	ensembl_havana	14	0.0710157	0.0001	0.15804	0.132091	0.573853	0.128623	0.246456	0.0320371	0.126638	0.141697	0.23943	0.0662903	0.271607	0.111345	0.721437	0.405941	0.21816	0.495205	0.164926	0.311054
1	171225054	171226380	+	ENSMUSG00000005681	protein_coding	ENSMUSG00000005681	Apoa2	ensembl_havana	12	0.0001	0.0001	0.0001	0.0001	0.168851	0.578452	0.0308945	0.0001	0.0001	0.0001	0.0599326	0.0001	0.0001	0.0001	0.0001	0.0369947	0.560825	0.858282	0.0001	0.0001
10	128303335	128321359	+	ENSMUSG00000005682	protein_coding	ENSMUSG00000005682	Pan2	ensembl_havana	9	33.9333	40.9276	32.4726	43.5573	37.969	53.7869	29.8092	46.1173	31.6346	40.6386	41.7333	41.0381	58.6456	60.3691	34.0669	47.0408	36.3849	39.6415	27.1304	37.4079
10	128337734	128362480	+	ENSMUSG00000005683	protein_coding	ENSMUSG00000005683	Cs	ensembl_havana	8	642.815	565.253	568.363	593.269	421.472	465.927	585.25	559.22	538.861	517.503	583.846	626.491	523.092	536.683	646.941	630.53	428.301	407.835	534.793	577.659
7	110768206	110812406	+	ENSMUSG00000005686	protein_coding	ENSMUSG00000005686	Ampd3	ensembl_havana	17	4.14867	5.5973	7.20216	13.7932	10.9689	14.6517	22.8188	8.17601	11.5467	6.30119	6.31244	3.50819	3.32606	1.37212	36.0998	15.09	6.47959	23.5341	12.4279	9.17324
3	103171655	103179167	+	ENSMUSG00000005687	protein_coding	ENSMUSG00000005687	Bcas2	ensembl_havana	14	177.112	158.792	98.681	102.59	102.229	80.9052	92.0449	86.4859	88.197	77.8787	125.23	109.446	129.984	143.321	93.5772	103.674	113.858	114.732	94.4451	94.0015
X	42502453	42529331	+	ENSMUSG00000005696	protein_coding	ENSMUSG00000005696	Sh2d1a	ensembl_havana	11	0.0001	0.0001	0.0001	0.0001	0.0001	0.0001	0.0001	0.0001	0.0001	0.0001	0.0001	0.0001	0.0001	0.0001	0.0001	0.0001	0.0001	0.0001	0.0001	0.0001
8	105636568	105682923	+	ENSMUSG00000005698	protein_coding	ENSMUSG00000005698	Ctcf	ensembl_havana	15	144.526	147.307	140.124	149.117	144.214	142.371	132.663	136.723	133.371	135.58	137.765	139.231	132.428	148.216	146.628	153.74	172.548	154.671	117.422	129.668
8	105701148	105703497	+	ENSMUSG00000005699	protein_coding	ENSMUSG00000005699	Pard6a	ensembl_havana	16	6.94984	8.37973	7.17057	9.33849	9.82139	7.48655	10.7782	8.65507	10.4078	10.4075	7.80825	7.57889	8.41681	7.15686	11.4431	7.63729	9.93739	12.2127	8.66992	7.4319
8	105566698	105637394	-	ENSMUSG00000005705	protein_coding	ENSMUSG00000005705	Agrp	ensembl_havana	10	0.0355578	0.0971613	0.0001	0.0330979	0.0001	0.0322307	0.215662	0.0959114	0.126638	0.0708987	0.0001	0.0662903	0.0679767	0.0742633	0.0656761	0.0001	0.0312514	0.066114	0.0330651	0.0622908
15	78191114	78206401	-	ENSMUSG00000005716	protein_coding	ENSMUSG00000005716	Pvalb	ensembl_havana	16	0.0001	0.0001	0.0001	0.0660957	0.202601	0.0643614	0.0308945	0.0001	0.0001	0.0001	0.0001	0.0001	0.0001	0.0001	0.0001	0.0001	0.187008	0.165135	0.0001	0.0001
16	4544661	4559855	-	ENSMUSG00000005718	protein_coding	ENSMUSG00000005718	Tfap4	ensembl_havana	8	56.5908	56.1015	27.3869	32.008	28.1477	26.7328	19.647	19.5456	24.7382	26.3726	32.1003	29.6203	43.3054	50.0974	28.0011	36.452	29.8431	34.8555	26.8337	25.8093
16	18239784	18248733	-	ENSMUSG00000005732	protein_coding	ENSMUSG00000005732	Ranbp1	ensembl_havana	14	185.445	173.902	162.331	147.138	151.336	127.687	138.853	127.589	123.659	116.358	134.384	144.096	109.146	124.335	154.858	155.142	150.492	152.79	151.574	145.651
1	165788681	165877278	+	ENSMUSG00000005763	protein_coding	ENSMUSG00000005763	Cd247	ensembl_havana	15	0.0001	0.0324538	0.0001	0.46207	0.0001	0.706975	0.0308945	0.798529	0.0317345	0.247896	0.0300163	0.0331952	0.0340383	0.0742633	0.0984642	0.110784	0.0312514	0.0001	0.0001	0.0001
3	94954075	94961562	+	ENSMUSG00000005774	protein_coding	ENSMUSG00000005774	Rfx5	ensembl_havana	12	29.9265	43.7747	18.5738	37.6507	32.164	41.1274	34.6439	35.0032	23.631	24.992	38.622	29.4548	62.4806	64.4851	22.5911	36.5996	31.1203	46.2099	24.0317	33.1167
3	94884093	94886962	-	ENSMUSG00000005779	protein_coding	ENSMUSG00000005779	Psmb4	ensembl_havana	12	405.957	378.41	225.096	277.974	292.006	256.435	280.507	257.19	253.898	243.512	299.672	270.52	337.381	343.117	227.615	239.852	301.982	345.616	264.314	301.968
9	7558456	7568486	+	ENSMUSG00000005800	protein_coding	ENSMUSG00000005800	Mmp8	ensembl_havana	3	0.0001	0.0324538	0.0001	0.0001	0.877604	0.0643614	0.154073	0.0001	0.980768	0.247896	0.0599326	0.0331952	0.848559	0.0371817	0.0656761	0.0001	2.08724	0.594226	0.0001	0.0001
2	122681233	122702664	-	ENSMUSG00000005802	protein_coding	ENSMUSG00000005802	Slc30a4	ensembl_havana	12	163.106	198.846	93.5637	83.2537	73.6767	75.7642	104.024	81.0885	114.042	92.7818	91.2448	109.313	53.1475	80.5044	91.1837	106.847	68.4708	80.0751	98.3021	114.4
2	122765237	122809570	+	ENSMUSG00000005803	protein_coding	ENSMUSG00000005803	Sqor	ensembl_havana	14	0.851088	2.49134	7.04422	8.21657	7.89763	13.8484	19.2159	40.5603	38.6574	70.4094	11.8769	22.7365	0.916435	2.55874	17.6401	6.71493	7.32068	16.7347	20.4714	26.4312
2	122738503	122749476	+	ENSMUSG00000005804	protein_coding	ENSMUSG00000005804	Bloc1s6	ensembl_havana	14	43.1878	51.2485	45.5816	47.088	39.5553	38.3963	45.5452	46.1493	55.4553	56.0019	48.7337	53.3164	44.7648	45.9072	52.461	53.0177	35.793	45.9128	42.6899	43.7824
3	138458956	138489516	-	ENSMUSG00000005813	protein_coding	ENSMUSG00000005813	Metap1	ensembl_havana	12	199.096	154.036	141.009	113.777	136.688	103.75	143.718	110.982	122.014	106.481	141.474	131.984	104.904	122.258	138.202	121.015	157.782	131.797	150.024	131.503
17	57234635	57248447	-	ENSMUSG00000005823	protein_coding	ENSMUSG00000005823	Gpr108	ensembl_havana	9	24.2178	28.0508	26.8815	32.569	30.8815	36.0829	32.242	34.62	33.9122	33.0631	32.6089	29.7196	43.1697	34.5973	30.6897	29.2576	27.351	34.0963	27.2952	31.6241
17	57189492	57194178	-	ENSMUSG00000005824	protein_coding	ENSMUSG00000005824	Tnfsf14	ensembl_havana	7	0.0001	0.0001	0.0001	0.0001	0.0001	0.0001	0.0001	0.0001	0.0001	0.0001	0.0001	0.0001	0.0001	0.0001	0.0001	0.0001	0.0001	0.0001	0.0330651	0.0001
18	11052064	11085636	+	ENSMUSG00000005836	protein_coding	ENSMUSG00000005836	Gata6	ensembl_havana	10	93.6088	69.043	94.0376	96.9148	161.427	137.005	195.884	95.0451	188.004	169.28	119.366	77.6082	193.754	81.5798	86.7901	82.0907	128.967	179.294	115.807	90.7054
16	11192970	11203332	-	ENSMUSG00000005846	protein_coding	ENSMUSG00000005846	Rsl1d1	ensembl_havana	12	539.066	439.591	398.356	341.924	346.682	316.198	319.001	301.902	312.549	329.533	338.623	342.568	399.115	406.044	385.817	368.467	364.129	379.119	345.573	320.967
X	71991849	72010219	+	ENSMUSG00000005864	protein_coding	ENSMUSG00000005864	Cnga2	ensembl_havana	7	0.0001	0.0001	0.031688	0.0001	0.0001	0.096492	0.0616891	0.0001	0.126638	0.106298	0.0001	0.0001	0.0340383	0.0001	0.0001	0.0001	0.0624028	0.099121	0.0001	0.0001
18	34220924	34322553	+	ENSMUSG00000005871	protein_coding	ENSMUSG00000005871	Apc	ensembl_havana	15	127.542	132.165	141.609	163.043	81.4055	128.876	119.883	157.546	110.563	111.083	107.19	122.684	100.016	96.9316	149.776	124.852	86.4763	78.7548	144.948	162.971
18	34344885	34374071	-	ENSMUSG00000005873	protein_coding	ENSMUSG00000005873	Reep5	ensembl_havana	6	62.5477	72.9578	82.5395	94.7039	67.3316	100.794	94.2622	113.856	87.7225	81.0292	75.5387	90.9456	52.876	45.0914	88.2656	94.8931	71.6171	61.8222	86.7643	101.216
2	156008045	156018280	+	ENSMUSG00000005881	protein_coding	ENSMUSG00000005881	Ergic3	ensembl_havana	13	102.899	136.145	113.306	133.971	136.249	135.238	123.702	140.651	129.005	154.271	110.272	113.947	118.818	130.639	96.5282	113.968	133.453	163.154	124.74	125.097
2	155846894	155930311	-	ENSMUSG00000005882	protein_coding	ENSMUSG00000005882	Uqcc1	ensembl_havana	18	60.9876	68.5254	63.4604	57.2184	61.0879	54.2367	41.2648	51.1315	49.856	55.5771	54.7768	53.6143	49.5501	52.174	63.6417	54.8256	71.5237	62.4824	52.8102	64.8651
2	172977700	172993577	+	ENSMUSG00000005883	protein_coding	ENSMUSG00000005883	Spo11	ensembl_havana	15	0.0001	0.0001	1.8322	1.02303	0.0676003	0.0001	0.0001	0.0001	0.126638	0.0001	0.149681	0.0331952	0.0001	0.0001	1.9346	0.147679	0.0001	0.0001	0.824228	0.248863
1	13139105	13374084	-	ENSMUSG00000005886	protein_coding	ENSMUSG00000005886	Ncoa2	ensembl_havana	14	40.7766	64.9018	53.984	93.219	49.0053	78.0134	47.8548	83.388	66.5274	95.3306	51.5758	65.4292	72.3566	66.4875	61.4122	72.4243	50.3407	57.2673	49.4478	91.7937
13	28016212	28023560	+	ENSMUSG00000005891	protein_coding	ENSMUSG00000005891	Prl4a1	ensembl_havana	7	0.0001	0.0001	0.0001	0.0001	0.0001	0.0001	0.0001	0.0001	0.0001	0.0001	0.0001	0.0001	0.0001	0.0001	0.0001	0.0001	0.0001	0.0001	0.0001	0.0001
6	92242061	92244651	-	ENSMUSG00000005892	protein_coding	ENSMUSG00000005892	Trh	ensembl_havana	4	0.0001	0.0001	0.0001	0.0001	0.0001	0.0001	0.0001	0.0639743	0.0001	0.0708987	0.0001	0.0001	0.0001	0.0001	0.0001	0.0001	0.124706	0.0001	0.0001	0.0001
6	92091390	92174295	+	ENSMUSG00000005893	protein_coding	ENSMUSG00000005893	Nr2c2	ensembl_havana	14	61.874	70.3372	56.1951	80.4489	69.2554	80.7766	58.2018	65.9822	61.0546	64.1083	62.8542	64.4695	66.0102	68.1933	52.8545	63.4589	63.144	73.7377	54.92	70.9598
10	94148023	94197212	+	ENSMUSG00000005897	protein_coding	ENSMUSG00000005897	Nr2c1	ensembl_havana	14	20.4238	23.9742	18.0684	26.1014	20.3852	23.3912	20.2937	21.1744	24.7699	22.9389	25.04	21.7105	43.0679	35.2277	21.9681	26.6011	17.2891	23.204	19.2847	19.7457
16	17619354	17644829	+	ENSMUSG00000005899	protein_coding	ENSMUSG00000005899	Smpd4	ensembl_havana	14	119.954	106.768	77.4223	83.6167	88.9317	80.7766	77.9103	74.765	73.2655	77.5247	88.3728	84.7899	85.1514	93.7796	78.1996	84.7102	82.6447	90.4393	83.1051	91.6693
5	3596066	3637233	+	ENSMUSG00000005907	protein_coding	ENSMUSG00000005907	Pex1	ensembl_havana	14	15.9916	17.827	15.2255	24.8475	18.0902	19.2785	22.5109	20.7592	16.45	20.0007	18.6679	15.4886	19.1413	18.6151	18.5254	19.5174	18.2237	19.3422	16.2189	21.8602
11	21994764	22002898	-	ENSMUSG00000005917	protein_coding	ENSMUSG00000005917	Otx1	ensembl_havana	15	1.24112	1.16484	3.44319	4.12483	5.40012	8.70751	6.68251	10.9226	2.30942	3.07984	8.52624	6.25508	3.12243	3.55994	11.4103	13.3929	6.63535	6.73353	6.29644	9.17324
17	28951950	28969550	+	ENSMUSG00000005936	protein_coding	ENSMUSG00000005936	Kctd20	ensembl_havana	19	131.62	131.551	112.011	156.014	118.564	127.238	108.397	145.378	127.614	143.651	117.81	132.381	117.902	155.113	106.332	124.151	116.319	130.081	115.576	123.729
11	73090583	73147447	+	ENSMUSG00000005947	protein_coding	ENSMUSG00000005947	Itgae	ensembl_havana	11	0.0710157	0.0971613	0.031688	0.0990936	0.0001	0.0643614	0.123278	0.22366	0.0317345	0.0708987	0.299263	0.231766	0.271607	0.482162	0.0984642	0.0738893	0.0624028	0.066114	0.0660302	0.0311954
11	73183596	73199043	-	ENSMUSG00000005949	protein_coding	ENSMUSG00000005949	Ctns	ensembl_havana	9	11.5948	16.8888	14.2463	22.5046	17.6852	17.7041	20.3245	22.8032	25.023	26.2664	22.4972	24.7553	21.5849	23.9549	21.3451	23.8709	13.7379	31.2247	21.7571	22.451
11	73160421	73172686	+	ENSMUSG00000005950	protein_coding	ENSMUSG00000005950	P2rx5	ensembl_havana	14	0.638341	0.679529	0.758212	1.68299	0.810104	0.996151	3.78783	0.89434	2.97374	1.23908	2.03441	1.82033	0.678867	0.482162	2.03296	3.65267	0.405068	0.825275	1.21981	1.49268
11	73199460	73224512	+	ENSMUSG00000005951	protein_coding	ENSMUSG00000005951	Shpk	ensembl_havana	13	0.780173	1.2619	0.726624	0.92404	0.776353	1.54237	1.44744	1.08596	1.58182	1.30988	2.24382	2.18438	2.78304	2.07667	1.57393	1.47589	0.778885	1.15535	1.21981	1.30611
11	73234292	73261243	+	ENSMUSG00000005952	protein_coding	ENSMUSG00000005952	Trpv1	ensembl_havana	15	0.0001	0.0001	0.031688	0.0001	0.0001	0.0001	0.0616891	0.0001	0.0001	0.0001	0.0001	0.0001	0.0001	0.0001	0.0656761	0.0001	0.0001	0.0001	0.0001	0.0622908
16	21204755	21223306	+	ENSMUSG00000005958	protein_coding	ENSMUSG00000005958	Ephb3	ensembl_havana	15	20.7784	21.7418	42.6123	42.9303	54.2366	19.7926	34.2744	13.7969	37.392	20.7441	30.3352	9.89555	22.637	16.0565	40.7229	20.1446	44.3908	24.1942	40.4813	6.62342
3	94612757	94658873	-	ENSMUSG00000005968	protein_coding	ENSMUSG00000005968	Tuft1	ensembl_havana	14	202.748	97.0291	89.7416	88.4014	73.0354	94.0145	57.0624	81.8869	65.2936	70.3032	114.729	86.4777	267.943	131.64	95.8068	117.952	59.2189	51.524	81.0943	95.9294
2	105386291	105399320	-	ENSMUSG00000005973	protein_coding	ENSMUSG00000005973	Rcn1	ensembl_havana	6	91.6941	135.692	126.984	163.01	85.658	127.43	105.964	160.868	101.926	125.137	87.3258	115.37	70.9991	93.2234	103.873	133.669	84.9188	115.657	129.289	163.095
16	4036942	4040025	+	ENSMUSG00000005980	protein_coding	ENSMUSG00000005980	Dnase1	ensembl_havana	15	0.0001	0.0648075	0.0001	0.0660957	0.0001	0.0001	0.0001	0.0001	0.0001	0.0001	0.0001	0.0001	0.0001	0.0001	0.0001	0.0001	0.0001	0.0001	0.0001	0.0001
16	4039971	4077828	-	ENSMUSG00000005981	protein_coding	ENSMUSG00000005981	Trap1	ensembl_havana	11	213.669	238.706	145.684	144.729	165.173	156.669	136.543	127.781	147.86	153.492	164.031	156.441	282.944	267.174	172.99	164.809	138.593	175.234	143.266	136.105
16	3872375	3904771	+	ENSMUSG00000005982	protein_coding	ENSMUSG00000005982	Naa60	ensembl_havana	14	46.6272	47.8837	36.4842	44.8112	48.2628	44.6296	38.0621	45.4147	34.5766	42.1607	36.0792	38.8869	31.1216	38.7504	37.9687	45.6757	40.5281	52.2172	37.1188	41.3881
16	3895179	3908690	-	ENSMUSG00000005983	protein_coding	ENSMUSG00000005983	1700037C18Rik	ensembl_havana	15	3.04948	2.71782	2.96937	2.54093	4.01637	2.66695	3.84942	2.68282	3.13191	3.29224	3.20114	2.18438	3.39393	3.07788	2.78709	2.32446	4.51705	4.95115	2.934	2.76759
19	4270180	4283138	-	ENSMUSG00000005986	protein_coding	ENSMUSG00000005986	Ankrd13d	ensembl_havana	16	1.20567	3.009	1.76903	2.54093	3.17261	4.43413	4.06498	4.24774	5.15652	5.16841	3.88922	3.70676	2.34185	2.96663	1.34441	2.25067	3.05294	5.21521	3.4944	4.44674
4	80834123	80851720	+	ENSMUSG00000005994	protein_coding	ENSMUSG00000005994	Tyrp1	ensembl_havana	14	0.0355578	0.0001	0.0001	0.0330979	0.0001	0.0001	0.0001	0.0959114	0.0001	0.0001	0.0001	0.0001	0.0001	0.0001	0.0001	0.0001	0.0001	0.0001	0.0001	0.0001
1	150392838	150449936	+	ENSMUSG00000006005	protein_coding	ENSMUSG00000006005	Tpr	ensembl_havana	18	378.335	368.801	400.062	385.679	332.034	373.487	297.198	357.025	341.494	357.604	356.991	389.828	389.476	339.26	367.03	335.778	349.612	289.934	373.824	424.048
1	150319417	150333907	+	ENSMUSG00000006007	protein_coding	ENSMUSG00000006007	Pdc	ensembl_havana	14	0.0001	0.0001	0.063276	0.0001	0.0001	0.0001	0.0308945	0.0001	0.0001	0.0001	0.0001	0.0001	0.0001	0.0001	0.0001	0.0001	0.0001	0.0001	0.0001	0.0001
1	150361305	150393081	-	ENSMUSG00000006010	protein_coding	ENSMUSG00000006010	Odr4	ensembl_havana	14	35.7771	41.1864	38.0005	37.1227	46.0016	43.3123	37.8158	35.7378	42.0423	44.7449	45.5028	40.8395	65.0599	46.1297	40.854	38.1861	50.3719	51.491	40.679	36.786
1	150449412	150466166	-	ENSMUSG00000006014	protein_coding	ENSMUSG00000006014	Prg4	ensembl_havana	16	0.141931	4.23844	0.47392	4.19083	2.02511	60.213	0.400429	9.70899	1.51855	7.54016	0.329179	8.77032	61.8358	6.74896	1.14768	2.17688	1.18385	27.1649	0.659402	4.32236
7	16197147	16222038	-	ENSMUSG00000006019	protein_coding	ENSMUSG00000006019	Dhx34	ensembl_havana	15	11.7012	17.3741	12.0667	17.7529	14.3439	18.1218	10.9014	12.232	19.2022	13.912	16.9327	16.5477	25.9969	22.3974	17.3778	23.5758	12.3672	14.8202	14.3729	14.9881
7	16119895	16127517	+	ENSMUSG00000006021	protein_coding	ENSMUSG00000006021	Kptn	ensembl_havana	5	9.18368	12.2945	11.3402	14.7831	11.5764	17.3507	10.2855	13.3818	12.0528	11.6111	12.4453	12.7748	14.9669	13.9057	12.0989	16.1969	8.41097	12.2127	10.3511	15.7033
7	16098458	16117976	+	ENSMUSG00000006024	protein_coding	ENSMUSG00000006024	Napa	ensembl_havana	13	164.879	190.014	165.9	186.933	132.908	177.49	173.835	179.742	172.092	170.908	154.129	174.312	159.205	174.803	189.712	213.473	108.718	144.934	185.231	199.353
18	36666681	36670816	-	ENSMUSG00000006050	protein_coding	ENSMUSG00000006050	Sra1	ensembl_havana	12	41.734	44.2277	56.6374	53.3906	46.0016	45.4008	61.62	47.2671	57.8279	57.7365	50.1398	46.6974	37.7735	34.3377	51.838	48.701	48.5651	48.6854	58.2495	51.5563
11	96099326	96111965	-	ENSMUSG00000006056	protein_coding	ENSMUSG00000006056	Calcoco2	ensembl_havana	13	0.0355578	0.0001	0.031688	0.0001	0.0001	0.0001	0.0001	0.0320371	0.0001	0.0354994	0.0898489	0.0331952	0.0340383	0.0001	0.0001	0.110784	0.0001	0.033107	0.0001	0.0001
11	96068852	96075671	-	ENSMUSG00000006057	protein_coding	ENSMUSG00000006057	Atp5g1	ensembl_havana	15	88.7866	87.3553	62.0389	63.224	91.4293	81.1301	80.9589	73.3597	76.4606	84.3922	82.599	85.0547	88.2058	98.6003	87.6426	73.6418	100.027	111.762	71.9629	76.4637
11	96034885	96047431	+	ENSMUSG00000006058	protein_coding	ENSMUSG00000006058	Snf8	ensembl_havana	10	45.1379	47.8837	36.1368	37.7826	44.1115	48.6781	41.1416	46.309	44.5731	53.7009	59.4737	56.1295	47.3441	51.9886	43.4115	46.3029	52.1475	56.6071	42.5251	47.2962
7	30224131	30232273	-	ENSMUSG00000006095	protein_coding	ENSMUSG00000006095	Tbcb	ensembl_havana	12	48.9319	45.8777	53.7629	60.7821	48.3303	51.0236	50.7187	61.6707	48.4325	59.294	50.2296	51.6285	35.4996	40.0483	52.9856	59.6588	55.0758	45.1537	58.4472	57.1845
11	75630988	75648872	+	ENSMUSG00000006127	protein_coding	ENSMUSG00000006127	Inpp5k	ensembl_havana	9	23.0832	35.8481	16.2679	48.8369	39.049	64.6149	31.6877	42.8278	31.0968	43.1873	35.2415	45.7707	72.2888	57.6621	25.083	36.0831	35.17	68.4566	23.6361	35.4178
16	17451987	17487435	+	ENSMUSG00000006134	protein_coding	ENSMUSG00000006134	Crkl	ensembl_havana	4	112.401	108.353	103.135	110.84	97.5718	97.838	97.7111	112.93	95.6627	103.862	99.6812	102.959	86.7465	88.5882	110.561	116.071	86.819	108.956	121.641	132.218
5	136054492	136064327	+	ENSMUSG00000006143	protein_coding	ENSMUSG00000006143	Upk3bl	ensembl_havana	12	0.0355578	0.0324538	0.063276	0.0330979	0.0338501	0.096492	0.0308945	0.0001	0.0633689	0.141697	0.179598	0.132481	0.135853	0.0371817	0.229616	0.0369947	0.0001	0.066114	0.0989953	0.0311954
7	4460674	4480488	+	ENSMUSG00000006154	protein_coding	ENSMUSG00000006154	Eps8l1	ensembl_havana	13	0.0001	0.129515	0.063276	0.231085	0.168851	0.353538	0.277251	0.0639743	0.126638	0.247896	0.0898489	0.0331952	0.441298	0.185508	0.16404	0.147679	0.0312514	0.264156	0.0330651	0.0311954
11	45852051	45910626	+	ENSMUSG00000006169	protein_coding	ENSMUSG00000006169	Clint1	ensembl_havana	19	248.843	212.273	218.747	209.602	232.1	193.459	239.92	197.02	217.772	183.015	247.198	217.071	227.557	245.036	197.778	185.986	244.85	211.707	232.767	222.239
13	22002173	22009743	-	ENSMUSG00000006179	protein_coding	ENSMUSG00000006179	Prss16	ensembl_havana	9	0.425594	0.355991	0.442332	0.759051	0.371352	0.771236	0.708374	1.18177	0.379713	1.06208	0.299263	0.496527	0.271607	0.556325	0.754226	1.69725	0.21816	0.429191	0.956088	2.30116
13	29191746	29855675	-	ENSMUSG00000006191	protein_coding	ENSMUSG00000006191	Cdkal1	ensembl_havana	17	21.3457	19.7359	18.7318	15.4761	18.9677	18.4752	23.9582	18.5236	19.2655	17.5582	19.5953	19.096	20.3292	15.7227	18.3942	17.0454	14.0805	12.7738	21.8889	18.7506
X	37826910	37829858	+	ENSMUSG00000006200	protein_coding	ENSMUSG00000006200	Rhox6	ensembl_havana	3	0.0001	0.0001	0.0001	0.0001	0.0001	0.0001	0.0001	0.0001	0.0001	0.0001	0.0001	0.0001	0.0001	0.0001	0.0328881	0.0001	0.0001	0.0001	0.0001	0.0001
7	131174402	131306452	+	ENSMUSG00000006204	protein_coding	ENSMUSG00000006204	5430419D17Rik	ensembl_havana	7	0.0710157	3.65608	0.568684	3.92684	0.0338501	12.8524	0.369634	38.3886	0.0317345	8.49595	0.0898489	15.9189	0.271607	43.8677	0.393557	13.6142	0.0312514	0.759261	0.428646	14.646
7	130936111	130985661	+	ENSMUSG00000006205	protein_coding	ENSMUSG00000006205	Htra1	ensembl_havana	13	50.8821	38.7923	110.211	78.172	236.454	109.694	234.778	68.2817	87.9123	45.5945	148.983	81.5466	13.3718	11.6808	72.9863	38.4812	175.85	164.309	228.91	90.5188
4	141444654	141467931	+	ENSMUSG00000006215	protein_coding	ENSMUSG00000006215	Zbtb17	ensembl_havana	12	39.0747	41.1864	35.6629	39.0696	40.5003	42.8303	50.1952	43.754	44.0669	44.2847	35.9296	31.0103	37.0947	37.2672	37.8375	41.1007	36.0734	48.3554	37.4485	35.8842
4	141404353	141416015	-	ENSMUSG00000006216	protein_coding	ENSMUSG00000006216	Clcnkb	ensembl_havana	10	0.0710157	0.0324538	0.031688	0.0001	0.135101	0.0001	0.0616891	0.0001	0.189907	0.0708987	0.0001	0.0001	0.0340383	0.0001	0.0328881	0.0001	0.0624028	0.099121	0.0001	0.0001
4	141368220	141384176	+	ENSMUSG00000006218	protein_coding	ENSMUSG00000006218	Fam131c	ensembl_havana	4	0.851088	0.647175	0.663448	0.165089	2.59886	0.642714	0.831552	0.319471	2.21451	1.13288	0.418928	0.496527	0.61099	0.44508	0.918166	0.369047	3.20869	1.51842	1.15388	0.186672
4	141576062	141606097	-	ENSMUSG00000006219	protein_coding	ENSMUSG00000006219	Fblim1	ensembl_havana	12	7.12713	11.6798	65.103	19.2049	81.473	30.2029	48.7478	18.1723	105.501	64.2145	62.0465	42.8583	6.17688	2.48457	88.7902	24.8302	55.7922	59.1817	80.9954	31.6552
4	141420779	141425312	+	ENSMUSG00000006221	protein_coding	ENSMUSG00000006221	Hspb7	ensembl_havana	7	2.23394	3.07371	0.221216	0.165089	0.303851	0.160753	0.646785	0.415283	0.601155	0.672688	1.04717	0.297956	6.00719	2.18792	0.360769	1.10694	0.0935542	0.132128	0.626437	0.155577
9	21958897	21963507	-	ENSMUSG00000006235	protein_coding	ENSMUSG00000006235	Epor	ensembl_havana	6	0.425594	0.808944	1.0425	1.94697	3.20636	3.37382	2.09413	3.19381	1.48692	1.87627	1.04717	1.3901	0.543113	1.07547	1.3772	0.996256	2.92833	3.33381	1.15388	1.15063
9	21927471	21935873	+	ENSMUSG00000006241	protein_coding	ENSMUSG00000006241	Ccdc159	ensembl_havana	16	1.31204	2.39428	1.64268	2.14496	4.35387	3.18104	3.20273	3.12994	3.03701	3.32764	3.41056	2.28367	6.95746	5.22862	1.47556	2.25067	1.90033	4.39003	2.53841	1.86582
5	88720855	88764221	+	ENSMUSG00000006262	protein_coding	ENSMUSG00000006262	Mob1b	ensembl_havana	15	74.8162	66.1959	112.611	109.454	75.9379	72.6154	88.288	70.2938	79.2128	70.5864	68.5084	66.9516	53.996	48.3917	75.3471	67.3697	96.4759	86.7095	84.5886	78.8891
6	83742990	83758856	+	ENSMUSG00000006269	protein_coding	ENSMUSG00000006269	Atp6v1b1	ensembl_havana	7	0.0001	0.0001	0.031688	0.0001	0.0001	0.0001	0.0001	0.0001	0.0001	0.0708987	0.0001	0.0001	0.0001	0.0001	0.0001	0.0001	0.0001	0.0001	0.0660302	0.0311954
19	59166187	59170057	-	ENSMUSG00000006270	protein_coding	ENSMUSG00000006270	Vax1	ensembl_havana	7	0.0001	0.0001	0.0001	0.0001	0.0001	0.0001	0.0001	0.0001	0.0001	0.0001	0.0001	0.0001	0.0001	0.0001	0.0001	0.0001	0.0001	0.0001	0.0001	0.0001
8	69088646	69113712	+	ENSMUSG00000006273	protein_coding	ENSMUSG00000006273	Atp6v1b2	ensembl_havana	14	138.853	119.838	158.161	180.333	200.341	174.213	187.816	166.872	164.088	156.076	177.404	189.238	141.727	128.377	231.779	164.661	251.516	259.897	192.352	192.263
8	72340999	72421461	-	ENSMUSG00000006276	protein_coding	ENSMUSG00000006276	Eps15l1	ensembl_havana	10	82.4041	84.314	90.8788	95.2979	89.033	97.838	85.4241	98.7498	83.4202	103.012	77.2141	85.6504	92.8554	95.1888	113.873	116.624	96.8809	94.7632	93.1265	96.8312
14	50824059	50870561	-	ENSMUSG00000006281	protein_coding	ENSMUSG00000006281	Tep1	ensembl_havana	8	22.5158	31.2862	26.1234	25.0785	26.0552	34.7012	25.9291	25.6776	19.4869	19.5051	26.0572	23.2991	39.4365	32.5949	34.7882	33.6849	22.7095	23.4021	24.7239	27.5195
14	50765415	50785520	-	ENSMUSG00000006288	protein_coding	ENSMUSG00000006288	Ttc5	ensembl_havana	8	24.1114	26.9508	18.258	46.2301	18.0227	30.1065	21.1867	29.1587	16.0704	19.5405	22.916	24.9538	32.4791	38.3796	21.9681	27.7449	14.4543	22.2468	18.4606	30.3181
14	50906478	50924894	-	ENSMUSG00000006289	protein_coding	ENSMUSG00000006289	Osgep	ensembl_havana	14	24.9979	29.5067	16.3627	28.5102	19.5752	26.9899	18.7232	24.4959	14.3621	14.9386	19.9842	19.8572	27.4902	31.2599	23.4764	29.6265	14.6413	21.5867	22.5153	25.7782
1	74279840	74284739	-	ENSMUSG00000006299	protein_coding	ENSMUSG00000006299	Aamp	ensembl_havana	13	248.595	239.742	196.098	229.038	217.959	232.819	225.662	222.187	231.185	220.184	236.339	208.831	319.733	258.496	182.597	209.008	223.356	266.103	233.063	262.57
1	74288247	74305623	-	ENSMUSG00000006301	protein_coding	ENSMUSG00000006301	Tmbim1	ensembl_havana	17	50.9176	61.2134	65.9558	89.1273	48.1953	75.9249	46.623	65.8226	62.3516	61.8782	53.7896	61.6895	92.516	65.2268	72.724	91.093	45.1385	43.5033	71.4685	120.122
1	74236084	74268210	+	ENSMUSG00000006304	protein_coding	ENSMUSG00000006304	Arpc2	ensembl_havana	14	472.653	390.542	509.104	449.53	462.613	467.084	497.917	433.866	476.731	467.767	509.086	452.212	542.199	414.759	479.198	461.368	460.885	490.385	539.243	450.075
7	30568858	30588727	-	ENSMUSG00000006307	protein_coding	ENSMUSG00000006307	Kmt2b	ensembl_havana	16	132.648	151.416	121.709	130.21	92.3405	121.229	114.125	124.587	104.457	107.366	117.392	130.561	119.972	120.293	118.988	149.128	86.2894	97.3047	122.235	153.611
7	30589681	30598910	-	ENSMUSG00000006310	protein_coding	ENSMUSG00000006310	Zbtb32	ensembl_havana	10	0.0355578	0.0648075	0.063276	0.165089	0.168851	0.160753	0.431223	0.319471	0.664424	0.53109	0.299263	0.0993855	0.509175	0.0742633	0.754226	0.332152	0.155857	0.429191	0.329751	0.0622908
7	30633616	30635853	-	ENSMUSG00000006311	protein_coding	ENSMUSG00000006311	Etv2	ensembl_havana	8	0.177389	0.226576	0.0001	0.0330979	0.10135	0.0322307	0.0308945	0.0320371	0.0633689	0.0354994	0.0300163	0.132481	0.0340383	0.0742633	0.0656761	0.0001	0.0312514	0.198142	0.0330651	0.186672
7	30603092	30612848	-	ENSMUSG00000006313	protein_coding	ENSMUSG00000006313	Upk1a	ensembl_havana	5	0.531968	0.485407	0.916152	0.363076	0.675103	0.578452	0.95473	0.511094	0.822596	0.743487	0.628342	0.728193	0.373422	0.370917	0.655861	0.442836	0.996944	0.957303	0.923123	0.964057
7	30727701	30729541	-	ENSMUSG00000006315	protein_coding	ENSMUSG00000006315	Tmem147	ensembl_havana	9	71.3058	63.64	60.27	61.6731	63.4504	75.957	70.5504	61.543	66.1161	57.3471	73.8933	71.3533	57.8989	66.1538	104.233	82.4965	55.9168	56.5081	88.6763	83.2114
7	3703993	3706898	+	ENSMUSG00000006333	protein_coding	ENSMUSG00000006333	Rps9	ensembl_havana	14	658.63	736.372	654.819	732.519	577.701	724.579	491.111	602.622	504.949	540.053	674.912	697.447	926.177	1001.84	652.089	780.064	618.199	723.448	538.452	521.408
7	3620324	3629930	-	ENSMUSG00000006335	protein_coding	ENSMUSG00000006335	Tfpt	ensembl_havana	16	16.6298	18.2153	15.6046	15.8721	13.0277	15.455	14.5659	16.8949	17.2725	19.045	18.279	19.3939	14.5596	14.9069	15.5416	15.4221	10.8719	14.1271	17.9661	17.8489
10	75636706	75644009	-	ENSMUSG00000006342	protein_coding	ENSMUSG00000006342	Susd2	ensembl_havana	15	0.141931	0.355991	0.979328	1.02303	2.86886	1.47811	7.54476	1.50115	5.34632	1.62847	1.01725	0.562718	1.05219	0.44508	1.04932	0.959361	1.86918	2.60765	2.90103	1.05734
10	75589340	75617201	+	ENSMUSG00000006344	protein_coding	ENSMUSG00000006344	Ggt5	ensembl_havana	17	0.283763	0.355991	0.0001	0.132091	1.31636	0.610583	4.71166	0.511094	2.21451	0.106298	1.55575	0.231766	3.15637	1.11255	0.0328881	0.0369947	0.467371	1.05632	0.362716	0.0933862
10	75561604	75586201	+	ENSMUSG00000006345	protein_coding	ENSMUSG00000006345	Ggt1	ensembl_havana	10	0.0710157	0.323638	0.15804	1.08903	0.135101	0.321407	0.462018	0.127849	0.411348	0.743487	0.179598	0.264861	0.0001	0.0742633	0.295193	0.0738893	0.280462	0.264156	0.329751	0.311054
12	113140236	113145507	+	ENSMUSG00000006356	protein_coding	ENSMUSG00000006356	Crip2	ensembl_havana	10	155.164	102.95	133.207	190.101	142.021	241.912	103.377	144.356	165.733	186.059	124.183	130.527	235.227	153.963	292.273	231.403	108.345	164.738	126.949	104.045
12	113146316	113153880	+	ENSMUSG00000006360	protein_coding	ENSMUSG00000006360	Crip1	ensembl_havana	11	21.133	6.63262	48.5824	132.618	175.636	99.8944	211.559	62.4372	168.707	52.6035	78.65	26.1784	203.97	40.9383	150.366	25.2729	148.561	139.818	59.634	10.4171
8	122625141	122699110	-	ENSMUSG00000006362	protein_coding	ENSMUSG00000006362	Cbfa2t3	ensembl_havana	16	0.461052	0.355991	0.31598	1.25402	7.56013	2.73121	4.65007	1.30952	2.8472	2.12406	2.9319	1.45629	0.0679767	0.0742633	0.688649	0.258363	12.4295	9.04402	1.15388	0.311054
15	85205949	85286536	+	ENSMUSG00000006369	protein_coding	ENSMUSG00000006369	Fbln1	ensembl_havana	14	39.4647	99.5203	26.534	42.4023	17.4152	19.6641	23.8659	49.8859	45.7119	85.5249	8.67583	12.9072	22.5352	26.3281	4.65601	8.92861	22.9898	51.6231	23.3394	35.0446
X	36598206	36606080	+	ENSMUSG00000006373	protein_coding	ENSMUSG00000006373	Pgrmc1	ensembl_havana	10	150.412	187.264	183.811	200.825	179.585	213.926	247.003	207.751	221.283	204.75	183.866	243.415	118.309	157.152	194.564	295.969	153.888	154.77	215.955	286.233
15	79030874	79038354	+	ENSMUSG00000006378	protein_coding	ENSMUSG00000006378	Gcat	ensembl_havana	15	12.3749	16.8241	6.28611	9.2395	5.97388	6.52263	7.11364	7.47339	10.5027	15.682	8.61599	7.94294	18.9377	20.9142	6.68887	6.60424	8.72249	9.37409	4.97783	6.7478
4	94739289	94874977	+	ENSMUSG00000006386	protein_coding	ENSMUSG00000006386	Tek	ensembl_havana	15	0.0001	0.0001	0.126452	0.990036	0.540102	0.353538	0.585196	0.511094	0.601155	0.814285	0.149681	0.0001	0.0340383	0.0001	0.16404	0.147679	0.21816	0.297163	0.0660302	0.74639
4	118442415	118457514	-	ENSMUSG00000006389	protein_coding	ENSMUSG00000006389	Mpl	ensembl_havana	13	0.0001	0.0001	0.0001	0.0001	0.0001	0.0322307	0.0001	0.0001	0.0001	0.0001	0.0300163	0.0001	0.0679767	0.0001	0.0001	0.0001	0.0001	0.0001	0.0001	0.0311954
4	118428093	118432954	+	ENSMUSG00000006390	protein_coding	ENSMUSG00000006390	Elovl1	ensembl_havana	15	80.5603	69.4636	83.3608	115.328	80.5617	94.1751	116.373	98.0152	97.972	90.1269	71.3505	93.858	69.3701	68.6754	109.316	100.981	73.6108	73.9028	95.8626	111.601
4	118409337	118415783	+	ENSMUSG00000006392	protein_coding	ENSMUSG00000006392	Med8	ensembl_havana	16	50.8821	43.0306	54.9948	55.0405	45.8328	40.3562	57.7706	46.4367	58.2075	61.2764	57.3496	57.6188	37.0608	41.0866	58.9858	62.6472	49.6554	44.3285	56.3704	57.8686
4	118359990	118362745	+	ENSMUSG00000006395	polymorphic_pseudogene	ENSMUSG00000006395	Hyi	ensembl_havana	16	7.55262	7.99148	6.47564	8.01858	8.40389	9.09308	10.1623	6.83465	12.4324	8.42515	9.84256	6.65223	14.8651	8.67721	8.22991	8.33829	6.29268	4.91814	7.81283	6.28137
4	118432901	118437353	-	ENSMUSG00000006398	protein_coding	ENSMUSG00000006398	Cdc20	ensembl_havana	15	273.167	268.731	218.305	258.307	186.065	225.879	173.343	203.504	214.64	222.91	222.458	239.642	212.59	245.481	253.714	284.421	157.346	146.287	159.024	207.717
1	171250421	171260638	+	ENSMUSG00000006403	protein_coding	ENSMUSG00000006403	Adamts4	ensembl_havana	13	1.77299	4.43257	5.11735	4.12483	6.31138	3.14891	6.92887	5.5891	8.95265	5.4162	6.76118	3.50819	8.07743	3.74535	10.23	12.9501	6.01232	3.49884	4.45039	3.48278
1	171370099	171388599	+	ENSMUSG00000006411	protein_coding	ENSMUSG00000006411	Nectin4	ensembl_havana	12	0.780173	0.841298	1.80062	0.330079	16.0989	1.86368	21.0944	2.65088	30.4641	5.2746	12.3555	4.26938	0.81462	0.66757	2.78709	0.664204	12.4295	3.89493	3.36254	0.653103
1	171345670	171359255	+	ENSMUSG00000006412	protein_coding	ENSMUSG00000006412	Pfdn2	ensembl_havana	10	124.386	131.809	84.498	106.715	110.768	96.4885	92.5993	95.0451	99.3007	103.72	115.477	108.287	175.97	145.434	94.856	100.649	121.864	114.138	92.4013	112.503
2	167492645	167516174	+	ENSMUSG00000006418	protein_coding	ENSMUSG00000006418	Rnf114	ensembl_havana	17	63.7179	73.9932	59.8909	65.6658	66.0491	61.3376	62.5438	60.0739	70.8613	66.9403	63.0936	64.6018	70.9312	71.5306	63.4122	65.1561	69.7169	65.585	60.524	52.5824
X	36823737	36874112	-	ENSMUSG00000006423	protein_coding	ENSMUSG00000006423	C330007P06Rik	ensembl_havana	15	38.9328	35.3951	41.6962	38.2446	29.8352	30.5242	39.3555	35.0671	33.3745	27.9656	36.1091	39.4495	31.3591	33.8927	37.772	34.9762	29.5316	31.9839	46.9424	42.352
19	47178820	47259442	+	ENSMUSG00000006435	protein_coding	ENSMUSG00000006435	Neurl1a	ensembl_havana	16	1.41841	1.81191	1.45315	2.34295	2.09261	3.21317	13.3033	10.4116	24.9281	48.4264	20.8218	22.0415	0.305545	0.44508	6.13147	6.01393	3.3333	8.87898	19.944	6.68561
4	148591503	148594994	+	ENSMUSG00000006442	protein_coding	ENSMUSG00000006442	Srm	ensembl_havana	10	476.057	379.575	303.877	285.795	237.669	226.939	305.112	256.711	259.023	241.778	348.585	373.678	391.072	401.558	344.439	337.291	273.727	208.571	239.854	289.312
4	141301240	141329385	+	ENSMUSG00000006445	protein_coding	ENSMUSG00000006445	Epha2	ensembl_havana	3	283.627	121.65	459.226	162.845	253.092	134.242	417.851	171.343	389.325	206.874	301.526	229.151	203.766	120.256	314.077	180.157	269.148	127.506	386.351	213.19
19	4800569	4811635	-	ENSMUSG00000006456	protein_coding	ENSMUSG00000006456	Rbm14	ensembl_havana	10	102.651	103.856	100.766	97.8717	93.1843	85.3713	83.9152	85.4958	79.7822	100.817	100.519	107.46	108.705	108.501	97.3807	104.154	92.8312	89.218	86.1379	86.3209
19	4861216	4877910	-	ENSMUSG00000006457	protein_coding	ENSMUSG00000006457	Actn3	ensembl_havana	4	0.922004	1.6825	0.916152	1.05603	14.2427	3.72726	4.98881	2.33151	9.17409	4.49582	2.45324	2.28367	5.59993	5.33986	1.47556	1.21762	13.1148	14.7872	1.91208	1.49268
2	167691177	167729173	+	ENSMUSG00000006462	lncRNA	ENSMUSG00000006462	A530013C23Rik	ensembl_havana	6	0.177389	0.129515	0.31598	0.165089	0.573853	0.578452	0.708374	0.255597	0.822596	0.53109	0.299263	0.231766	0.441298	0.259672	0.16404	0.258363	0.436219	0.66024	0.329751	0.0933862
19	4878668	4885398	+	ENSMUSG00000006463	protein_coding	ENSMUSG00000006463	Zdhhc24	ensembl_havana	13	3.40405	4.20609	6.06499	8.18357	9.72014	10.0891	6.34377	7.05821	14.4887	17.5228	11.6375	13.6353	7.02534	6.86021	8.525	9.37134	10.5293	10.1663	8.24138	9.76405
19	4886878	4906629	-	ENSMUSG00000006464	protein_coding	ENSMUSG00000006464	Bbs1	ensembl_havana	9	3.97138	5.14435	4.95941	4.42181	7.56013	5.46232	4.31133	4.7268	9.01592	11.0801	7.50909	6.75151	14.8651	10.2346	4.06582	4.68572	7.10262	9.86919	4.02184	3.51388
2	25228898	25234365	-	ENSMUSG00000006469	protein_coding	ENSMUSG00000006469	Slc34a3	ensembl_havana	13	0.0355578	0.0001	0.0001	0.0001	0.0001	0.0001	0.0001	0.0320371	0.0001	0.0708987	0.0001	0.0001	0.0001	0.0001	0.0001	0.0001	0.0001	0.0001	0.0001	0.0001
2	25244821	25256023	-	ENSMUSG00000006471	protein_coding	ENSMUSG00000006471	Ndor1	ensembl_havana	18	17.7999	17.8594	10.3294	10.5264	15.4239	12.8845	13.3033	9.38962	14.3621	17.2042	15.766	15.952	16.0869	17.5397	10.9841	12.9132	12.3049	16.3056	11.6698	12.5626
2	25054355	25062882	+	ENSMUSG00000006476	protein_coding	ENSMUSG00000006476	Nsmf	ensembl_havana	19	33.2241	52.2191	34.3047	41.7094	39.3865	50.0597	35.3522	45.0954	39.5115	50.5858	34.4637	35.5443	40.6582	47.9096	22.5583	38.0385	31.4007	42.3811	32.5696	46.1457
13	27633366	27642494	-	ENSMUSG00000006488	protein_coding	ENSMUSG00000006488	Prl7a1	ensembl_havana	17	0.283763	0.0001	0.31598	0.231085	0.168851	0.128623	0.277251	0.127849	0.379713	0.460292	0.179598	0.198671	0.0340383	0.0001	0.983742	0.405941	0.21816	0.066114	0.230856	0.40434
13	27557995	27564607	-	ENSMUSG00000006490	protein_coding	ENSMUSG00000006490	Prl8a9	ensembl_havana	3	0.0001	0.0001	0.0001	0.0001	0.0338501	0.0001	0.0001	0.0001	0.0001	0.0001	0.0001	0.0001	0.0001	0.0001	0.0001	0.0001	0.0001	0.0001	0.0001	0.0001
2	71873224	71903859	+	ENSMUSG00000006494	protein_coding	ENSMUSG00000006494	Pdk1	ensembl_havana	11	47.9037	70.9519	22.6487	27.1243	23.6252	19.2464	11.7944	17.7891	18.4114	20.6379	14.7189	8.77032	126.76	85.8071	19.5746	21.2145	10.3735	13.2359	13.1861	10.0128
10	79854427	79864772	+	ENSMUSG00000006498	protein_coding	ENSMUSG00000006498	Ptbp1	ensembl_havana	16	813.403	769.017	746.835	812.44	702.003	779.747	676.895	734.97	711.491	773.122	779.619	867.126	757.063	783.758	743.863	865.106	706.109	733.053	699.718	754.841
8	122433601	122443423	-	ENSMUSG00000006517	protein_coding	ENSMUSG00000006517	Mvd	ensembl_havana	5	55.0307	55.6486	32.283	75.2682	39.6903	35.1511	40.8644	35.5461	53.3991	34.2313	35.7202	24.8215	46.292	55.1405	46.7559	41.1376	37.1949	53.6365	34.4486	16.605
8	122424776	122432931	-	ENSMUSG00000006519	protein_coding	ENSMUSG00000006519	Cyba	ensembl_havana	11	47.3718	67.3606	38.1584	34.9448	47.5541	33.0626	61.2812	62.7247	77.4413	76.0025	64.1406	74.7621	34.753	21.1737	5.18061	11.8802	54.92	42.7112	92.5332	96.7068
14	30908572	30923761	-	ENSMUSG00000006522	protein_coding	ENSMUSG00000006522	Itih3	ensembl_havana	17	0.0001	0.0324538	0.094864	0.0330979	0.0338501	0.0001	0.0001	0.0001	0.0001	0.0354994	0.0001	0.0331952	0.0001	0.0001	0.131252	0.147679	0.0001	0.0001	0.0330651	0.248863
14	30825590	30877211	+	ENSMUSG00000006526	protein_coding	ENSMUSG00000006526	Stimate	ensembl_havana	13	18.3318	20.3506	17.026	18.9739	14.1077	17.6398	17.8917	19.2582	18.0634	15.1864	15.9455	17.7391	12.3197	15.6856	21.05	20.3291	14.8593	15.0513	20.4714	24.41
14	30714849	30822722	+	ENSMUSG00000006527	protein_coding	ENSMUSG00000006527	Sfmbt1	ensembl_havana	16	18.7573	10.6121	18.5738	19.3698	16.7402	17.929	22.1722	10.22	21.0054	12.1775	18.3388	15.4886	13.1682	12.4966	27.5749	21.1038	15.2954	11.7836	28.5479	23.2595
14	30929180	30943290	-	ENSMUSG00000006529	protein_coding	ENSMUSG00000006529	Itih1	ensembl_havana	16	0.0001	0.0001	0.0001	0.0001	0.0001	0.0001	0.0001	0.0001	0.0950034	0.0001	0.0001	0.0001	0.0001	0.0001	0.0001	0.0369947	0.0001	0.0001	0.0330651	0.0001
1	74945315	74951673	-	ENSMUSG00000006538	protein_coding	ENSMUSG00000006538	Ihh	ensembl_havana	12	0.0001	0.0324538	0.094864	0.132091	0.168851	0.192884	0.184867	0.0320371	0.0633689	0.212496	0.119765	0.264861	0.0679767	0.0742633	0.0984642	0.258363	0.155857	0.132128	0.329751	0.186672
1	74738922	74749222	-	ENSMUSG00000006542	protein_coding	ENSMUSG00000006542	Prkag3	ensembl_havana	13	0.212847	0.323638	0.347568	0.495068	0.675103	0.642714	0.67758	0.574969	1.36038	1.52227	0.508677	0.728193	0.509175	0.927142	1.60672	1.84483	0.436219	0.726254	0.362716	1.18173
1	74889934	74893144	-	ENSMUSG00000006546	protein_coding	ENSMUSG00000006546	Cryba2	ensembl_havana	3	0.0001	0.0001	0.0001	0.0001	0.0001	0.0001	0.0001	0.0320371	0.0001	0.0001	0.0001	0.0001	0.0001	0.0001	0.0001	0.0001	0.0001	0.0001	0.0330651	0.0311954
8	21992785	22060306	-	ENSMUSG00000006567	protein_coding	ENSMUSG00000006567	Atp7b	ensembl_havana	11	0.177389	0.550114	0.221216	0.528066	0.371352	0.321407	0.308045	1.05403	0.790961	1.38067	0.179598	0.231766	1.79883	0.89006	0.393557	0.332152	0.591976	0.231149	0.230856	0.373245
8	21839926	21843483	+	ENSMUSG00000006570	protein_coding	ENSMUSG00000006570	Defb2	ensembl_havana	3	0.0001	0.0001	0.0001	0.0001	0.0001	0.0001	0.0001	0.0001	0.0001	0.0001	0.0001	0.0001	0.0001	0.0001	0.0001	0.0001	0.0001	0.0001	0.0001	0.0001
11	102348824	102366204	-	ENSMUSG00000006574	protein_coding	ENSMUSG00000006574	Slc4a1	ensembl_havana	15	0.0001	0.0324538	0.0001	0.0001	0.0001	0.0001	0.0001	0.0001	0.0001	0.0354994	0.0001	0.0331952	0.0001	0.0001	0.0001	0.0369947	0.124706	0.033107	0.0330651	0.0001
11	102393403	102402556	+	ENSMUSG00000006575	protein_coding	ENSMUSG00000006575	Rundc3a	ensembl_havana	14	0.106474	0.323638	0.126452	0.165089	0.371352	0.803367	0.0924836	0.415283	0.601155	1.30988	0.658258	0.529623	0.271607	0.0371817	0.131252	0.664204	0.21816	0.594226	0.329751	0.653103
1	75546266	75562173	+	ENSMUSG00000006576	protein_coding	ENSMUSG00000006576	Slc4a3	ensembl_havana	16	3.58134	4.36786	11.7824	16.466	21.1277	27.4076	26.7913	20.376	34.6715	29.7356	20.4329	14.7936	17.9195	4.93196	14.0662	24.0554	15.825	28.5842	18.3617	24.0368
8	122568015	122573555	+	ENSMUSG00000006585	protein_coding	ENSMUSG00000006585	Cdt1	ensembl_havana	3	154.88	141.257	86.2353	76.7531	137.262	108.345	114.648	76.777	137.642	129.739	139.919	122.022	192.872	168.685	108.004	100.759	180.46	155.595	99.8514	86.2587
4	13743436	13893650	+	ENSMUSG00000006586	protein_coding	ENSMUSG00000006586	Runx1t1	ensembl_havana	15	0.602883	5.40318	3.6959	11.0874	3.37511	8.0649	2.77161	12.4875	2.24615	17.6644	0.598426	4.83199	0.950374	1.96543	1.3772	5.68188	4.45475	6.89856	5.04376	11.2877
8	122454208	122460734	-	ENSMUSG00000006587	protein_coding	ENSMUSG00000006587	Snai3	ensembl_havana	6	0.319221	0.129515	0.063276	0.0330979	0.337601	0.160753	0.123278	0.0001	0.28481	0.0001	0.478761	0.0662903	1.154	0.259672	0.393557	0.0738893	0.498522	0.099121	0.230856	0.0001
8	122574635	122576910	-	ENSMUSG00000006589	protein_coding	ENSMUSG00000006589	Aprt	ensembl_havana	8	266.395	275.039	182.073	181.257	205.032	171.385	156.775	151.574	195.786	179.156	205.555	203.668	275.817	309.521	263.846	222.549	275.347	201.508	171.155	143.07
7	46796103	46823801	+	ENSMUSG00000006599	protein_coding	ENSMUSG00000006599	Gtf2h1	ensembl_havana	13	178.991	152.386	121.803	106.154	91.598	92.9542	107.781	109.704	117.301	110.588	121.58	147.406	95.5705	117.438	157.219	129.685	89.1865	92.2877	124.674	127.087
13	23702034	23710855	-	ENSMUSG00000006611	protein_coding	ENSMUSG00000006611	Hfe	ensembl_havana	15	1.77299	2.52369	0.284392	1.02303	0.641353	1.22107	1.53983	2.58701	0.980768	2.05326	1.67541	1.25772	1.79883	2.15084	0.655861	1.07004	1.46422	2.07954	1.74725	2.6743
5	30950066	30955092	+	ENSMUSG00000006638	polymorphic_pseudogene	ENSMUSG00000006638	Abhd1	ensembl_havana	15	2.09211	2.5884	6.44405	9.60248	9.55139	10.1534	8.71495	6.9624	11.6099	11.3279	6.31244	6.51985	5.59993	3.37453	10.0988	10.5151	8.28637	9.4401	5.83493	7.64957
5	31036036	31048925	-	ENSMUSG00000006641	protein_coding	ENSMUSG00000006641	Slc5a6	ensembl_havana	12	29.5719	31.0274	19.0161	19.8318	17.7189	13.2058	16.2288	15.7451	24.327	25.8062	21.48	27.1381	14.4918	19.7275	26.5912	20.6242	22.5849	21.0586	20.0429	21.8291
5	30968662	30977019	+	ENSMUSG00000006642	protein_coding	ENSMUSG00000006642	Tcf23	ensembl_havana	3	3.08493	2.26486	4.61195	6.59967	13.4327	5.04462	12.1639	3.25769	21.5432	14.1244	15.407	5.89104	1.56126	1.2238	21.2796	4.98088	14.2363	12.9388	10.2852	2.64321
7	30458315	30487224	+	ENSMUSG00000006649	protein_coding	ENSMUSG00000006649	Nphs1	ensembl_havana	17	0.0001	0.0001	0.0001	0.0001	0.0001	0.0322307	0.0308945	0.0001	0.0317345	0.0001	0.0001	0.0001	0.0001	0.0001	0.0001	0.0001	0.0312514	0.0001	0.0001	0.0311954
7	30434982	30445536	-	ENSMUSG00000006651	protein_coding	ENSMUSG00000006651	Aplp1	ensembl_havana	8	4.18413	5.75907	25.9338	65.0389	96.8968	38.9425	89.5814	19.1624	48.8753	16.7794	29.3181	10.061	27.0829	5.04321	36.9195	8.63345	120.681	80.4712	38.5693	8.17819
9	108516806	108560164	+	ENSMUSG00000006673	protein_coding	ENSMUSG00000006673	Qrich1	ensembl_havana	14	191.402	190.143	172.976	184.722	174.05	169.04	150.339	173.387	136.471	137.173	167.292	165.873	154.453	191.119	149.973	169.974	163.638	155.397	157.969	178.892
9	108578862	108597668	-	ENSMUSG00000006675	protein_coding	ENSMUSG00000006675	P4htm	ensembl_havana	10	0.0710157	0.291284	0.884564	1.88098	1.11385	1.2532	0.615991	1.05403	0.822596	1.94706	1.07709	1.78724	0.339483	0.630488	0.491921	0.885572	0.778885	1.35339	0.494577	1.15063
9	108490602	108502338	+	ENSMUSG00000006676	protein_coding	ENSMUSG00000006676	Usp19	ensembl_havana	16	240.227	248.218	203.901	236.76	266.863	261.705	266.865	247.289	234.127	212.29	250.34	234.744	224.706	240.66	212.27	249.371	207.562	225.108	227.196	233.837
X	93304767	93632156	-	ENSMUSG00000006678	protein_coding	ENSMUSG00000006678	Pola1	ensembl_havana	6	104.353	97.8703	78.591	66.1938	66.2854	69.563	59.1256	63.6828	60.7699	48.3202	76.2567	81.8113	101.747	106.128	77.8062	73.9001	67.1313	57.8284	64.315	66.451
4	137319696	137357721	-	ENSMUSG00000006699	protein_coding	ENSMUSG00000006699	Cdc42	ensembl_havana	17	421.771	351.944	496.058	495.364	390.861	444.689	482.55	493.94	440.89	433.43	395.643	418.919	300.456	315.083	499.92	488.633	399.828	330.433	519.332	522.372
17	31564734	31607694	+	ENSMUSG00000006705	protein_coding	ENSMUSG00000006705	Pknox1	ensembl_havana	13	31.0612	32.0303	24.7019	29.3022	25.3465	26.1866	31.0102	27.7854	29.3569	26.7266	29.2882	24.4574	36.6196	34.2265	25.6076	23.133	25.5131	27.2309	22.0538	23.6948
13	24845135	24901271	+	ENSMUSG00000006711	protein_coding	ENSMUSG00000006711	D130043K22Rik	ensembl_havana	15	0.0355578	0.226576	0.284392	0.198087	0.472602	0.192884	0.67758	0.287534	0.28481	0.283295	0.209514	0.132481	0.101915	0.111345	0.16404	0.369047	0.249311	0.726254	0.263821	0.217768
13	24751845	24761924	-	ENSMUSG00000006715	protein_coding	ENSMUSG00000006715	Gmnn	ensembl_havana	11	65.5617	56.4898	45.013	52.0707	51.0978	58.2209	56.4773	50.6844	42.1688	40.4262	56.5718	49.6097	51.8579	48.8737	45.805	52.2429	49.8112	46.54	49.3489	54.386
13	24817948	24831541	-	ENSMUSG00000006717	protein_coding	ENSMUSG00000006717	Acot13	ensembl_havana	7	24.3951	30.2185	23.1225	25.8374	48.9378	38.814	50.1644	31.8095	42.327	29.7002	41.2547	33.9557	35.2281	35.3389	47.7395	31.8402	47.3191	45.6158	40.1516	31.1577
13	21945094	21960780	+	ENSMUSG00000006720	protein_coding	ENSMUSG00000006720	Zfp184	ensembl_havana	16	8.29724	9.60917	9.4765	9.37149	10.2601	9.96061	8.4686	10.3477	5.97901	7.46936	7.56892	7.01627	8.11136	10.3459	6.78723	9.74029	7.47643	8.54891	6.9887	7.21423
10	127048250	127053007	+	ENSMUSG00000006724	protein_coding	ENSMUSG00000006724	Cyp27b1	ensembl_havana	12	0.212847	0.226576	0.15804	0.0990936	0.0676003	0.128623	0.308045	0.127849	0.158272	0.354094	0.23943	0.397242	0.0340383	0.148427	0.426345	0.147679	0.155857	0.099121	0.296786	0.155577
10	127063534	127067921	+	ENSMUSG00000006728	protein_coding	ENSMUSG00000006728	Cdk4	ensembl_havana	12	857.619	818.745	797.376	810.658	653.369	669.636	800.504	717.053	803.579	700.341	875.411	744.112	1132.32	1037.03	769.798	825.149	672.621	696.679	732.848	637.176
10	127165225	127172331	+	ENSMUSG00000006731	protein_coding	ENSMUSG00000006731	B4galnt1	ensembl_havana	10	3.12039	9.96506	4.83306	11.3514	0.270101	2.47416	1.01632	8.14407	1.61346	2.90285	1.49591	3.97152	8.34893	35.8581	3.54121	6.16151	0.280462	0.231149	2.20876	4.01141
10	127041414	127046366	+	ENSMUSG00000006732	protein_coding	ENSMUSG00000006732	Mettl1	ensembl_havana	14	37.55	35.1363	39.106	34.2519	29.599	29.1426	31.2873	25.965	37.7084	38.196	36.9168	41.6338	39.5722	38.8246	40.8868	37.9278	31.3695	26.1747	29.1742	30.5358
10	127067280	127070265	-	ENSMUSG00000006736	protein_coding	ENSMUSG00000006736	Tspan31	ensembl_havana	9	68.7883	86.5141	81.9709	105.296	74.4867	105.806	101.222	112.802	110.689	117.349	97.1682	98.1272	135.482	121.109	90.2984	105.925	64.39	75.7842	86.7313	111.291
18	6201002	6242175	-	ENSMUSG00000006740	protein_coding	ENSMUSG00000006740	Kif5b	ensembl_havana	14	363.656	301.958	428.175	393.005	326.87	327.508	455.698	356.003	471.006	370.915	379.399	371.493	183.81	169.018	480.542	421.817	344.223	238.311	443.513	488.042
7	46686108	46710681	-	ENSMUSG00000006763	protein_coding	ENSMUSG00000006763	Saal1	ensembl_havana	14	29.1819	33.8098	30.7036	36.3967	20.6889	29.0141	23.3731	33.1189	24.7699	26.3372	29.707	34.0219	32.547	32.8545	33.0505	36.5996	20.342	21.5207	25.9107	33.552
10	115078641	115185023	-	ENSMUSG00000006764	protein_coding	ENSMUSG00000006764	Tph2	ensembl_havana	8	0.212847	0.0648075	0.347568	0.231085	0.371352	0.128623	0.800758	0.255597	1.20221	0.247896	0.149681	0.0662903	0.882497	0.0001	0.0001	0.0738893	0.280462	0.165135	0.725332	0.124482
11	99477974	99493138	-	ENSMUSG00000006777	protein_coding	ENSMUSG00000006777	Krt23	ensembl_havana	7	0.0001	0.0001	0.0001	0.0001	0.607603	0.0322307	0.154073	0.0320371	0.379713	0.0354994	0.0001	0.0001	0.0001	0.0001	0.0984642	0.0369947	0.498522	0.33017	0.0660302	0.0311954
11	100574904	100591730	+	ENSMUSG00000006782	protein_coding	ENSMUSG00000006782	Cnp	ensembl_havana	16	12.8358	18.9594	8.21298	15.1791	21.3302	20.5316	17.9225	20.1524	13.6978	16.1776	22.557	17.3751	40.2849	31.4454	12.3284	12.3967	22.1799	26.0426	16.153	11.7853
11	100545607	100572569	+	ENSMUSG00000006784	protein_coding	ENSMUSG00000006784	Ttc25	ensembl_havana	14	0.283763	0.194223	0.15804	0.0660957	0.10135	0.128623	0.154073	0.351409	0.316445	0.318694	0.418928	0.0331952	0.644928	0.370917	0.426345	0.221468	0.373917	0.495205	0.197891	0.124482
2	166073089	166155664	-	ENSMUSG00000006800	protein_coding	ENSMUSG00000006800	Sulf2	ensembl_havana	14	4.9642	3.52666	30.1666	33.1629	69.0192	7.77573	13.5805	5.68491	33.501	8.49595	31.8909	6.08961	1.5952	2.03959	1.21326	4.46435	63.7358	5.51227	29.8006	0.839676
17	13006846	13040064	+	ENSMUSG00000006818	protein_coding	ENSMUSG00000006818	Sod2	ensembl_havana	5	102.19	96.8349	58.5642	73.4203	58.7591	67.0568	65.4693	72.7529	91.3604	126.093	86.2488	96.0422	98.591	110.615	82.79	83.1606	61.9602	65.7501	65.1062	69.2806
18	36735039	36742398	+	ENSMUSG00000006850	protein_coding	ENSMUSG00000006850	Tmco6	ensembl_havana	8	6.70163	7.7003	3.66431	8.61254	8.20139	8.41834	7.08284	6.93046	8.5414	7.57556	6.85093	4.83199	17.9195	9.49301	6.45935	6.86251	4.5482	8.41689	5.20859	5.25522
6	83543211	83572730	-	ENSMUSG00000006906	protein_coding	ENSMUSG00000006906	Stambp	ensembl_havana	10	19.431	21.1271	21.322	23.1316	23.5577	27.2469	27.746	22.5477	32.0458	26.4788	35.9296	28.0317	36.0766	26.8472	27.2798	27.4128	22.6472	23.5341	29.7017	25.1563
11	101191115	101226464	-	ENSMUSG00000006920	protein_coding	ENSMUSG00000006920	Ezh1	ensembl_havana	14	16.3107	28.3744	8.52886	17.7529	19.3052	29.1105	19.6162	20.7912	18.6961	23.8593	27.8522	30.9441	52.6724	32.7432	19.2139	24.9778	16.5726	33.4692	17.6035	24.1612
11	100347327	100356129	-	ENSMUSG00000006930	protein_coding	ENSMUSG00000006930	Hap1	ensembl_havana	15	3.04948	8.1856	5.528	14.7171	17.6514	25.2869	22.2338	17.6933	9.83842	12.3191	18.8474	18.1362	3.56363	8.60305	8.62336	10.7733	16.6661	25.6795	8.37324	15.5478
11	100408456	100414837	-	ENSMUSG00000006931	protein_coding	ENSMUSG00000006931	P3h4	ensembl_havana	15	80.4894	89.4583	176.577	193.071	168.076	179.836	182.181	125.832	151.592	111.933	157.809	101.437	132.937	69.0091	158.071	118.653	137.72	183.486	144.222	106.067
9	120929216	120960508	+	ENSMUSG00000006932	protein_coding	ENSMUSG00000006932	Ctnnb1	ensembl_havana	17	930.591	1113.88	796.27	894.935	875.31	882.276	870.993	849.624	821.262	720.058	853.931	796.567	705.68	838.676	749.273	824.227	747.166	739.39	906.673	866.318
9	120492232	120495331	+	ENSMUSG00000006941	protein_coding	ENSMUSG00000006941	Eif1b	ensembl_havana	5	22.9413	26.6273	25.5548	36.8917	19.6764	23.9696	22.0798	26.9551	18.9175	21.6645	23.5741	28.3627	22.8067	26.6247	23.0173	27.4128	16.6972	16.2395	21.6252	26.7421
7	43881160	43885805	+	ENSMUSG00000006948	protein_coding	ENSMUSG00000006948	Klk4	ensembl_havana	7	0.0001	0.0001	0.0001	0.0001	0.0001	0.0001	0.0001	0.0001	0.0001	0.0001	0.0001	0.0001	0.0001	0.0001	0.0001	0.0001	0.0001	0.0001	0.0001	0.0001
16	20733127	20742385	+	ENSMUSG00000006958	protein_coding	ENSMUSG00000006958	Chrd	ensembl_havana	14	1.3475	0.841298	4.01177	3.23389	47.8241	17.929	20.9404	5.26973	20.4992	10.7615	5.86369	2.7139	0.0340383	0.0371817	3.80352	1.4021	53.1132	33.4032	13.318	1.30611
16	20651652	20663415	+	ENSMUSG00000006998	protein_coding	ENSMUSG00000006998	Psmd2	ensembl_havana	16	607.358	587.35	498.743	571.622	541.656	509.079	552.115	576.242	514.914	569.682	479.229	541.139	393.888	456.401	532.577	561.242	476.523	659.15	551.309	642.089
17	24685092	24689956	-	ENSMUSG00000007021	protein_coding	ENSMUSG00000007021	Syngr3	ensembl_havana	5	2.34032	5.1767	1.23203	3.43188	3.57762	3.75939	3.84942	6.32366	1.70836	2.19486	2.00449	2.68081	1.66308	2.26208	2.1969	1.95552	2.58567	3.16877	1.91208	2.82978
17	35000987	35016323	+	ENSMUSG00000007029	protein_coding	ENSMUSG00000007029	Vars	ensembl_havana	16	490.808	547.523	366.326	417.192	368.315	367.157	325.406	346.486	318.717	371.41	372.757	390.192	492.581	537.425	377.424	426.945	366.621	361.163	270.841	344.04
17	35016579	35026742	+	ENSMUSG00000007030	protein_coding	ENSMUSG00000007030	Vwa7	ensembl_havana	8	0.0710157	0.226576	0.284392	0.528066	0.641353	0.289276	0.492812	0.191723	0.759327	0.708087	0.209514	0.0331952	0.135853	0.0742633	0.16404	0.332152	0.21816	0.561219	0.395681	0.124482
17	34972703	34979286	+	ENSMUSG00000007033	protein_coding	ENSMUSG00000007033	Hspa1l	ensembl_havana	4	0.141931	0.420699	0.094864	0.0660957	0.0676003	0.192884	0.0924836	0.159786	0.126638	0.424892	0.0599326	0.0662903	0.339483	0.852978	0.131252	0.110784	0.0312514	0.198142	0.0001	0.155577
17	34914466	34930437	+	ENSMUSG00000007034	protein_coding	ENSMUSG00000007034	Slc44a4	ensembl_havana	15	0.0001	0.0001	0.063276	0.0330979	0.0676003	0.0322307	0.123278	0.0320371	0.0950034	0.0708987	0.0599326	0.0662903	0.0001	0.0001	0.655861	0.0738893	0.187008	0.099121	0.197891	0.497626
17	35028605	35046746	-	ENSMUSG00000007035	protein_coding	ENSMUSG00000007035	Msh5	ensembl_havana	15	1.06384	0.938359	1.16886	0.858044	1.78886	0.899759	1.47824	0.702717	2.40432	2.05326	2.63273	1.22462	4.58178	2.07667	1.67229	1.51278	1.52652	1.65045	1.74725	0.932962
17	35089263	35102988	+	ENSMUSG00000007036	protein_coding	ENSMUSG00000007036	Abhd16a	ensembl_havana	15	34.5715	32.3215	30.9563	36.0668	30.8815	35.5366	42.4658	34.7477	28.6609	27.5408	33.8653	28.6605	45.6132	43.3857	30.6569	28.1507	28.4725	34.8555	34.3827	38.6828
17	34931253	34935954	+	ENSMUSG00000007038	protein_coding	ENSMUSG00000007038	Neu1	ensembl_havana	5	14.2542	18.6035	24.4492	38.5416	33.0077	38.589	37.631	34.7797	44.32	41.8775	30.7241	35.7429	18.1232	24.029	41.0835	33.1315	33.2698	41.1268	34.3827	46.0524
17	35059035	35062096	+	ENSMUSG00000007039	protein_coding	ENSMUSG00000007039	Ddah2	ensembl_havana	12	32.1249	51.8308	57.4902	52.8957	81.0342	73.9649	63.0981	67.7069	77.9158	65.0995	50.798	35.1472	43.8824	50.0974	32.034	40.9532	57.8482	68.1596	51.8213	32.7125
17	35049966	35058750	+	ENSMUSG00000007041	protein_coding	ENSMUSG00000007041	Clic1	ensembl_havana	9	202.181	204.444	258.327	238.443	219.815	223.951	285.034	215.736	307.867	272.823	225.689	221.241	223.077	201.947	243.189	245.054	199.867	197.349	261.974	251.531
17	34981862	34985892	+	ENSMUSG00000007050	protein_coding	ENSMUSG00000007050	Lsm2	ensembl_havana	17	78.291	74.252	53.289	53.7536	55.5866	51.2485	52.0121	51.387	46.8507	53.3115	62.8243	59.3728	62.6842	80.3561	50.9528	61.7986	54.92	49.9067	45.6568	52.2404
5	110286306	110337475	+	ENSMUSG00000007080	protein_coding	ENSMUSG00000007080	Pole	ensembl_havana	14	157.149	151.739	141.735	134.334	93.2518	99.7659	90.3513	90.9252	100.819	94.5164	113.054	114.079	131.952	113.47	106.496	100.095	121.148	94.8952	94.8737	111.446
1	172271709	172298065	-	ENSMUSG00000007097	protein_coding	ENSMUSG00000007097	Atp1a2	ensembl_havana	14	0.0001	0.129515	0.0001	0.132091	0.236351	0.257145	0.0308945	0.0320371	0.158272	0.106298	0.149681	0.0331952	0.0340383	0.0742633	0.0001	0.184573	0.0624028	0.231149	0.0001	0.0311954
1	172223513	172258415	-	ENSMUSG00000007107	protein_coding	ENSMUSG00000007107	Atp1a4	ensembl_havana	6	0.0001	0.0648075	0.0001	0.0660957	0.877604	0.192884	0.0924836	0.0639743	0.221541	0.106298	0.179598	0.0001	0.0001	0.0001	0.131252	0.110784	0.467371	0.132128	0.13196	0.0311954
1	172209894	172219869	-	ENSMUSG00000007122	protein_coding	ENSMUSG00000007122	Casq1	ensembl_havana	11	0.177389	0.0971613	0.284392	0.264083	1.31636	0.257145	0.462018	0.159786	0.85423	0.318694	0.418928	0.0993855	0.0340383	0.0001	0.524709	0.295257	0.841187	0.198142	0.527542	0.0622908
5	135023482	135051101	+	ENSMUSG00000007207	protein_coding	ENSMUSG00000007207	Stx1a	ensembl_havana	10	7.58808	14.8181	9.19221	12.1103	22.0389	24.0981	10.6858	19.7692	8.00362	13.9828	12.3256	14.0324	5.76962	8.86262	8.72173	10.0723	18.0056	27.2309	10.0215	15.0192
7	16721929	16726133	+	ENSMUSG00000007209	protein_coding	ENSMUSG00000007209	Ceacam9	ensembl_havana	4	0.0001	0.0001	0.0001	0.0001	0.0001	0.0001	0.0001	0.0001	0.0001	0.0001	0.0001	0.0001	0.0001	0.0001	0.0001	0.0001	0.0001	0.0001	0.0001	0.0001
6	48602063	48623228	+	ENSMUSG00000007216	protein_coding	ENSMUSG00000007216	Zfp775	ensembl_havana	6	6.66618	7.60324	4.29607	6.30269	5.90638	6.87607	4.80405	5.26973	2.11961	4.00023	6.55177	4.99747	11.607	8.60305	4.72158	6.67803	4.51705	6.00737	4.87894	4.29126
7	109798676	109865680	-	ENSMUSG00000007279	protein_coding	ENSMUSG00000007279	Scube2	ensembl_havana	14	0.0001	0.0324538	0.063276	0.726053	0.506352	0.225015	0.985525	0.287534	0.949134	0.53109	0.209514	0.364147	0.0001	0.0742633	0.0656761	0.147679	0.311614	0.924296	0.362716	0.622008
19	6053622	6057786	-	ENSMUSG00000007338	protein_coding	ENSMUSG00000007338	Mrpl49	ensembl_havana	10	81.4822	87.2582	73.0315	75.2352	98.8205	76.921	74.1225	76.6812	80.4149	107.685	95.3433	96.2408	106.533	103.68	70.6912	78.1799	121.428	122.918	76.4132	74.2559
3	103102604	103169770	+	ENSMUSG00000007379	protein_coding	ENSMUSG00000007379	Dennd2c	ensembl_havana	15	13.9705	12.1975	12.2562	13.6612	5.26512	6.45837	6.89807	6.1001	7.27603	8.70834	9.99214	9.96174	11.641	15.0553	10.9185	4.50125	4.26784	3.00374	12.2302	7.96052
12	111574523	111656222	+	ENSMUSG00000007411	protein_coding	ENSMUSG00000007411	Mark3	ensembl_havana	16	78.8584	90.073	109.263	132.453	97.5718	140.732	82.4371	130.719	97.9087	103.826	113.054	119.805	97.0977	120.367	129.054	150.346	94.3888	93.4759	71.1388	92.4156
5	3632932	3657186	-	ENSMUSG00000007415	protein_coding	ENSMUSG00000007415	Gatad1	ensembl_havana	15	98.112	93.276	120.666	113.381	102.601	97.1954	99.4972	109.896	110.246	133.279	108.267	114.344	76.3614	73.051	121.545	107.327	100.806	84.432	121.312	128.859
18	37005203	37187658	+	ENSMUSG00000007440	protein_coding	ENSMUSG00000007440	Pcdha11	ensembl_havana	10	0.0001	0.0001	0.0001	0.0330979	0.0001	0.0001	0.0308945	0.0001	0.0950034	0.0001	0.0599326	0.0331952	0.0001	0.0001	0.0656761	0.0738893	0.0001	0.0001	0.0001	0.0001
5	87969459	87972871	+	ENSMUSG00000007457	protein_coding	ENSMUSG00000007457	2310003L06Rik	ensembl_havana	3	0.0001	0.0001	0.0001	0.0001	0.0001	0.0001	0.0001	0.0001	0.0001	0.0001	0.0001	0.0001	0.0001	0.0001	0.0001	0.0001	0.0001	0.0001	0.0001	0.0001
6	122308720	122317681	+	ENSMUSG00000007458	protein_coding	ENSMUSG00000007458	M6pr	ensembl_havana	14	170.73	151.545	137.566	144.069	168.312	185.458	152.125	159.654	146.151	140.571	172.348	175.967	167.723	164.791	210.729	210.078	162.205	173.914	166.21	204.079
2	30237715	30263791	+	ENSMUSG00000007476	protein_coding	ENSMUSG00000007476	Lrrc8a	ensembl_havana	18	8.33269	8.73562	10.4557	10.5594	10.0576	10.2819	7.69873	10.4755	10.5344	10.7615	8.13733	10.1603	4.68359	6.52647	11.8038	11.585	8.03716	10.2323	9.49405	9.88844
18	68337596	68342447	+	ENSMUSG00000007480	protein_coding	ENSMUSG00000007480	Mc5r	ensembl_havana	4	0.0001	0.77659	0.126452	0.396074	0.0001	0.096492	0.154073	0.511094	0.126638	1.55767	0.0300163	0.264861	0.0679767	0.704652	0.131252	0.0738893	0.0001	0.132128	0.0001	0.217768
17	20945311	20965917	+	ENSMUSG00000007564	protein_coding	ENSMUSG00000007564	Ppp2r1a	ensembl_havana	15	352.416	345.83	328.294	412.242	341.822	370.049	305.513	364.722	366.897	421.5	345.055	384.566	369.351	362.918	344.931	403.185	362.789	368.919	323.025	383.935
17	28313519	28326573	+	ENSMUSG00000007570	protein_coding	ENSMUSG00000007570	Fance	ensembl_havana	16	28.8273	26.4331	17.184	17.9179	14.1414	16.6438	13.057	14.4676	16.6398	17.8414	23.7536	22.6372	35.6354	34.2265	18.6237	22.9486	13.146	13.632	13.9773	15.1747
14	55674689	55681821	-	ENSMUSG00000007589	protein_coding	ENSMUSG00000007589	Tinf2	ensembl_havana	9	32.0185	43.5159	39.4851	42.9303	37.0915	43.7621	44.6214	44.3927	33.2163	34.5499	39.9982	45.6383	40.1831	43.9419	35.4112	42.8348	34.952	36.4398	36.921	48.2913
14	55650184	55652540	+	ENSMUSG00000007591	protein_coding	ENSMUSG00000007591	Tssk4	ensembl_havana	15	0.212847	0.323638	0.379156	0.528066	0.270101	0.257145	0.431223	0.351409	0.506251	0.708087	0.478761	0.297956	0.475237	0.111345	0.393557	0.737993	0.0935542	0.363177	0.527542	0.373245
8	70083457	70090863	+	ENSMUSG00000007594	protein_coding	ENSMUSG00000007594	Hapln4	ensembl_havana	10	0.106474	0.550114	0.189628	0.165089	0.742603	0.192884	0.708374	0.479157	0.917499	0.814285	0.867673	0.728193	2.57941	2.85539	0.459133	0.0369947	0.965793	1.65045	0.263821	0.279959
17	56764757	56770094	+	ENSMUSG00000007603	protein_coding	ENSMUSG00000007603	Dus3l	ensembl_havana	9	79.3548	84.5729	60.8702	59.2642	72.4617	74.6718	66.855	64.1299	65.0722	75.9317	81.0134	74.6297	76.2935	85.4734	56.6251	67.5911	78.782	84.7951	57.7879	64.6785
8	71488103	71499584	+	ENSMUSG00000007610	protein_coding	ENSMUSG00000007610	Gtpbp3	ensembl_havana	15	42.4786	46.7513	30.2614	36.1657	27.7427	32.195	30.6715	32.4802	32.552	39.612	39.0708	40.8395	47.0047	57.1059	35.2801	41.3959	36.0734	32.743	29.372	35.3245
4	47353222	47414932	+	ENSMUSG00000007613	protein_coding	ENSMUSG00000007613	Tgfbr1	ensembl_havana	15	79.6384	56.3604	121.456	105.659	67.7366	92.5365	92.4761	97.121	83.61	111.048	78.5902	97.8625	41.2012	50.0604	64.8549	95.4097	66.0722	74.1008	158.661	125.004
13	93299635	93405130	+	ENSMUSG00000007617	protein_coding	ENSMUSG00000007617	Homer1	ensembl_havana	18	39.3938	33.3245	37.7162	36.2317	32.0965	31.5524	42.8353	32.9592	35.1143	23.1159	43.2591	36.835	28.101	31.1487	37.2473	38.4443	27.756	23.105	42.9866	48.9132
11	87376645	87404955	-	ENSMUSG00000007646	protein_coding	ENSMUSG00000007646	Rad51c	ensembl_havana	13	5.60244	9.22092	4.42242	6.99565	6.85138	8.22555	7.11364	8.59119	6.99132	8.21275	6.37227	7.81056	10.3174	10.2346	5.01667	7.45282	6.38613	8.74696	5.70306	7.49409
11	42419757	42629029	+	ENSMUSG00000007653	protein_coding	ENSMUSG00000007653	Gabrb2	ensembl_havana	12	0.0001	0.0001	0.0001	0.0330979	0.0001	0.0322307	0.0001	0.0001	0.0950034	0.460292	0.0001	0.0001	0.0340383	0.0371817	0.0001	0.0001	0.0001	0.0001	0.0001	0.0001
6	17306335	17341453	+	ENSMUSG00000007655	protein_coding	ENSMUSG00000007655	Cav1	ensembl_havana	16	170.73	82.4051	405.527	335.984	198.248	299.683	266.896	392.316	327.164	355.941	353.97	409.42	122.042	90.294	457.558	337.18	145.446	139.62	523.025	467.24
9	75037614	75060314	+	ENSMUSG00000007656	protein_coding	ENSMUSG00000007656	Arpp19	ensembl_havana	13	169.418	159.116	150.58	142.386	146.408	131.961	136.204	137.362	120.907	115.756	159.304	152.635	129.237	162.566	152.268	155.769	148.094	114.963	158.991	154.575
2	152780668	152831729	-	ENSMUSG00000007659	protein_coding	ENSMUSG00000007659	Bcl2l1	ensembl_havana	18	50.0666	41.0247	95.2063	48.408	57.9491	57.5783	64.3299	50.844	83.958	61.9844	52.4434	40.2107	31.1555	21.4333	59.6744	47.299	68.907	88.2938	91.0827	58.4284
17	57021051	57031523	-	ENSMUSG00000007670	protein_coding	ENSMUSG00000007670	Khsrp	ensembl_havana	10	290.01	297.558	168.617	183.072	274.963	254.218	183.659	177.954	193.445	203.44	254.199	233.817	329.779	333.698	165.678	188.569	262.793	280.725	173.364	199.104
12	90724552	90738439	-	ENSMUSG00000007682	protein_coding	ENSMUSG00000007682	Dio2	ensembl_havana	6	0.0001	0.0324538	0.0001	0.0330979	0.0001	0.0001	0.0001	0.127849	0.0001	0.0354994	0.0300163	0.0001	0.0001	0.0001	0.0001	0.0001	0.0001	0.033107	0.0660302	0.0001
8	70868227	70873936	-	ENSMUSG00000007721	protein_coding	ENSMUSG00000007721	Ccdc124	ensembl_havana	6	55.208	57.8486	54.9316	61.1451	46.5078	49.5456	41.973	49.9817	37.9298	42.3731	45.8917	48.7493	44.1878	55.5855	76.6258	69.5834	58.9385	49.0485	54.4585	54.5103
11	22990519	23003781	+	ENSMUSG00000007739	protein_coding	ENSMUSG00000007739	Cct4	ensembl_havana	10	432.834	416.814	512.673	419.832	395.991	369.535	400.421	392.603	422.763	481.608	461.22	493.78	380.958	430.518	448.147	440.227	491.507	406.58	432.14	426.287
11	51685386	51688875	-	ENSMUSG00000007777	protein_coding	ENSMUSG00000007777	0610009B22Rik	ensembl_havana	9	10.602	13.3622	11.1822	13.9912	16.6052	15.3586	11.548	13.4776	14.7418	15.2572	17.1421	14.5289	21.6867	19.0972	12.9842	13.2084	17.8498	19.0781	11.8675	9.39091
7	44959372	44974852	-	ENSMUSG00000007783	protein_coding	ENSMUSG00000007783	Cpt1c	ensembl_havana	10	11.7721	20.8036	5.74911	9.1735	8.94389	11.8563	14.0424	14.6912	17.1143	15.8944	17.7105	11.4179	47.2423	32.9657	2.39363	9.07618	7.13377	12.9719	9.2633	15.3923
1	91801461	91848029	+	ENSMUSG00000007805	protein_coding	ENSMUSG00000007805	Twist2	ensembl_havana	4	25.6361	51.2485	1.16886	3.43188	0.135101	8.12916	0.154073	4.43936	0.0317345	6.15959	0.0898489	8.83651	7.77198	17.651	0.0984642	8.81792	0.155857	3.96094	0.0330651	6.53013
5	145231715	145247303	+	ENSMUSG00000007812	protein_coding	ENSMUSG00000007812	Zfp655	ensembl_havana	16	55.2789	49.5337	49.5301	46.3951	39.5215	38.6212	41.4495	34.109	53.2409	42.7271	49.5415	49.1464	44.5611	40.6045	48.1002	41.5435	51.431	59.7428	59.634	47.1407
9	108306129	108337935	+	ENSMUSG00000007815	protein_coding	ENSMUSG00000007815	Rhoa	ensembl_havana	13	262.14	228.968	278.006	251.51	271.25	248.081	282.694	248.407	258.675	217.246	309.305	280.515	222.093	228.942	262.534	248.855	264.008	204.313	324.904	272.489
14	25459185	25666744	+	ENSMUSG00000007817	protein_coding	ENSMUSG00000007817	Zmiz1	ensembl_havana	15	293.804	244.627	216.441	114.074	238.31	141.311	283.525	186.449	268.387	166.412	224.761	152.536	221.21	217.929	112.529	119.317	183.98	169.821	344.947	98.5103
6	118501308	118562227	-	ENSMUSG00000007827	protein_coding	ENSMUSG00000007827	Ankrd26	ensembl_havana	10	34.9261	39.6335	41.6015	31.0841	33.2102	29.8495	25.4364	23.1545	23.4412	23.1513	42.3915	42.1633	34.2099	37.3043	35.3128	32.3198	37.3506	21.6857	29.8335	29.6651
7	45140684	45154585	-	ENSMUSG00000007833	protein_coding	ENSMUSG00000007833	Aldh16a1	ensembl_havana	15	46.3435	52.2838	38.4743	57.6144	34.2227	41.288	30.4251	38.3566	31.8876	27.3638	37.0365	34.6838	51.5864	48.5771	45.969	47.3728	30.1546	31.2907	44.503	45.3061
13	58125879	58128557	-	ENSMUSG00000007836	protein_coding	ENSMUSG00000007836	Hnrnpa0	ensembl_havana	6	245.971	243.106	215.177	228.312	216.204	208.56	184.952	188.653	158.331	142.907	199.512	179.475	229.729	240.883	180.433	221.479	131.646	138.894	170.595	141.702
7	45053584	45062678	-	ENSMUSG00000007837	protein_coding	ENSMUSG00000007837	Prrg2	ensembl_havana	11	10.5665	10.4827	10.203	7.16063	11.1039	10.057	11.1785	9.74093	12.1794	10.3367	13.4624	10.8222	10.0798	12.0887	8.525	9.44513	11.4327	13.3349	14.1751	8.0849
11	50376990	50386529	+	ENSMUSG00000007850	protein_coding	ENSMUSG00000007850	Hnrnph1	ensembl_havana	16	560.376	611.551	676.204	625.903	546.854	564.247	489.91	555.77	474.422	543.026	596.082	570.759	490.884	549.55	520.412	673.66	587.764	612.709	497.674	584.625
12	86082541	86162460	+	ENSMUSG00000007867	protein_coding	ENSMUSG00000007867	Ift43	ensembl_havana	9	11.2048	13.2328	19.6162	23.1646	20.8239	27.1827	14.1656	14.8828	24.2637	23.3991	22.2877	17.4082	27.5241	21.8412	27.083	29.7003	17.476	18.1209	15.4607	11.4432
4	136143497	136145756	+	ENSMUSG00000007872	protein_coding	ENSMUSG00000007872	Id3	ensembl_havana	3	121.975	119.418	238.395	184.029	206.956	241.687	297.383	286.828	259.308	231.406	170.852	222.102	216.357	211.329	201.024	258.964	176.504	265.013	268.006	273.951
11	98383811	98384954	+	ENSMUSG00000007877	protein_coding	ENSMUSG00000007877	Tcap	ensembl_havana	2	0.0001	0.0971613	0.031688	0.0330979	0.10135	0.321407	0.0616891	0.0959114	0.189907	0.0708987	0.149681	0.198671	0.0679767	0.0371817	0.0328881	0.0738893	0.124706	0.165135	0.197891	0.0622908
4	133679008	133756770	-	ENSMUSG00000007880	protein_coding	ENSMUSG00000007880	Arid1a	ensembl_havana	16	208.244	216.479	214.956	240.884	197.978	238.153	232.684	262.843	204.675	199.652	168.818	207.937	202.34	198.053	209.09	246.235	164.604	173.023	189.22	253.925
8	70493158	70504082	+	ENSMUSG00000007888	protein_coding	ENSMUSG00000007888	Crlf1	ensembl_havana	15	0.602883	1.16484	1.29521	0.231085	0.0338501	0.225015	0.123278	0.287534	0.158272	0.389493	0.119765	0.562718	0.20373	0.815897	0.0984642	0.258363	0.0001	0.231149	0.0660302	0.0311954
7	142375911	142388039	-	ENSMUSG00000007891	protein_coding	ENSMUSG00000007891	Ctsd	ensembl_havana	16	150.341	153.163	148.148	207.392	183.77	206.633	219.873	233.014	275.378	233.671	148.923	182.354	110.877	131.603	196.499	168.092	146.318	200.32	244.634	239.59
9	61913284	61914543	-	ENSMUSG00000007892	protein_coding	ENSMUSG00000007892	Rplp1	ensembl_havana	8	1312.97	1446.8	1209.95	1395.05	1226.35	1409.61	1006.37	1369.37	963.87	1136.11	1353.5	1573.51	1463.59	1901.55	1338.21	1504.12	1269.45	1639.82	1212.42	1302.68
5	87979439	87981545	+	ENSMUSG00000007907	protein_coding	ENSMUSG00000007907	Cabs1	ensembl_havana	4	0.0001	0.0001	0.0001	0.0001	0.0001	0.0001	0.0001	0.0001	0.0001	0.0001	0.0001	0.0001	0.0001	0.0001	0.0001	0.0001	0.0001	0.0001	0.0001	0.0001
9	76014855	76136351	+	ENSMUSG00000007908	protein_coding	ENSMUSG00000007908	Hmgcll1	ensembl_havana	14	0.0355578	0.129515	0.410744	0.0990936	0.0001	0.096492	0.0001	0.0959114	0.0001	0.177097	0.0001	0.0001	0.0679767	0.0001	0.0001	0.147679	0.0001	0.0001	0.0001	0.311054
7	27653915	27657347	+	ENSMUSG00000007944	protein_coding	ENSMUSG00000007944	Ttc9b	ensembl_havana	8	0.0001	0.0001	0.0001	0.0001	0.0001	0.0001	0.0001	0.0320371	0.0001	0.0354994	0.0300163	0.0001	0.0001	0.0371817	0.0001	0.110784	0.0001	0.0001	0.0330651	0.0001
7	101818313	101822727	+	ENSMUSG00000007946	protein_coding	ENSMUSG00000007946	Phox2a	ensembl_havana	11	0.0001	0.0001	0.094864	0.132091	0.0676003	0.0643614	0.739169	0.511094	0.601155	0.354094	0.269347	0.0331952	0.0001	0.0371817	0.0328881	0.0369947	0.155857	0.297163	0.362716	0.124482
8	71456705	71463656	-	ENSMUSG00000007950	protein_coding	ENSMUSG00000007950	Abhd8	ensembl_havana	9	28.3309	43.4512	28.8083	41.4454	31.3202	41.8664	36.3069	48.8959	35.7787	47.5414	32.4892	42.8583	30.2052	39.3808	41.3131	39.2191	29.2824	35.1196	34.119	43.7824
5	136908150	136915405	+	ENSMUSG00000007987	protein_coding	ENSMUSG00000007987	Ift22	ensembl_havana	12	11.0629	12.2945	13.2986	15.2121	13.0614	12.6917	15.7977	16.7352	17.4307	16.39	12.0863	11.1201	13.0324	11.7921	12.0661	16.6027	13.4263	14.4242	14.8344	20.5542
14	65192449	65262464	-	ENSMUSG00000007989	protein_coding	ENSMUSG00000007989	Fzd3	ensembl_havana	7	2.6949	6.89145	14.6885	37.3537	14.5464	29.6246	21.1251	46.277	15.2479	19.8591	14.7189	27.6015	2.13822	10.1976	12.7219	21.8417	15.42	22.3788	18.7902	25.1874
7	44360043	44385821	-	ENSMUSG00000008028	protein_coding	ENSMUSG00000008028	1700008O03Rik	ensembl_havana	15	0.141931	0.0648075	0.031688	0.0001	0.0001	0.0001	0.0308945	0.0001	0.0001	0.0001	0.179598	0.0662903	0.101915	0.0371817	0.0328881	0.0369947	0.0001	0.066114	0.0330651	0.0001
X	10715013	10719691	+	ENSMUSG00000008035	protein_coding	ENSMUSG00000008035	Mid1ip1	ensembl_havana	12	151.157	74.4785	148.874	101.633	176.075	77.8527	213.653	78.7252	190.281	83.0116	133.576	63.5759	114.746	78.1683	131.054	77.8478	186.503	91.4955	146.365	45.9591
7	16738410	16749295	+	ENSMUSG00000008036	protein_coding	ENSMUSG00000008036	Ap2s1	ensembl_havana	11	102.58	106.023	95.8381	105.659	75.2629	90.6729	88.9039	102.71	85.7927	86.2329	91.6935	100.576	97.6407	90.6648	96.7905	102.383	64.4212	70.239	101.302	106.595
5	108692382	108706925	+	ENSMUSG00000008090	protein_coding	ENSMUSG00000008090	Fgfrl1	ensembl_havana	14	25.1397	32.6451	57.3639	79.4589	40.0278	41.0631	33.5045	47.2032	32.9948	27.293	26.4162	27.8331	13.813	21.5816	28.8864	40.9532	34.1732	26.1086	47.0743	56.4693
8	84148025	84172591	+	ENSMUSG00000008129	protein_coding	ENSMUSG00000008129	4930432K21Rik	ensembl_havana	14	1.70208	2.78252	1.67426	1.584	1.82261	1.22107	1.23188	1.30952	1.74	2.05326	2.09424	1.75414	8.92588	5.33986	1.18047	0.774888	2.46106	1.38639	1.81318	1.27501
1	43123074	43196985	-	ENSMUSG00000008136	protein_coding	ENSMUSG00000008136	Fhl2	ensembl_havana	14	57.0872	41.8659	79.3807	39.7625	56.4978	37.336	68.8875	58.2854	62.0985	57.6657	60.1618	52.5552	29.2889	19.7275	75.4454	72.0554	47.4125	26.0756	102.06	88.5598
7	44489937	44496530	-	ENSMUSG00000008140	protein_coding	ENSMUSG00000008140	Emc10	ensembl_havana	17	87.3682	81.9846	72.2734	86.0255	79.0429	98.9305	78.7417	81.5356	81.6486	70.0908	88.9113	91.0449	96.1474	92.7043	80.1669	81.648	68.9381	72.5495	89.7641	85.6368
6	124430759	124464795	-	ENSMUSG00000008153	protein_coding	ENSMUSG00000008153	Clstn3	ensembl_havana	11	0.0355578	0.0971613	0.15804	0.0660957	0.573853	0.771236	1.90936	0.926277	0.85423	0.849685	0.508677	1.42319	0.40736	0.593407	0.229616	0.184573	0.155857	1.25437	0.296786	0.217768
8	85060055	85067125	+	ENSMUSG00000008167	protein_coding	ENSMUSG00000008167	Fbxw9	ensembl_havana	14	11.7721	11.8416	9.60285	10.5924	12.2514	10.539	10.2239	12.2959	13.4447	14.9032	12.7744	10.8553	11.4713	10.7909	11.5415	12.8763	10.8096	13.2689	12.6917	9.01777
7	44525993	44532072	-	ENSMUSG00000008193	protein_coding	ENSMUSG00000008193	Spib	ensembl_havana	13	0.177389	0.355991	0.063276	0.0660957	0.236351	0.160753	0.0308945	0.0959114	0.442982	0.637288	0.179598	0.0993855	0.20373	0.0371817	0.426345	0.0001	0.0935542	0.264156	0.164926	0.0622908
2	90745370	90781022	+	ENSMUSG00000008200	protein_coding	ENSMUSG00000008200	Fnbp4	ensembl_havana	14	149.668	135.724	107.652	96.1229	124.943	121.39	106.642	94.1189	100.028	115.367	129.867	116.859	142.304	151.775	95.8068	112.603	135.789	133.15	99.6866	98.8213
8	4493026	4531681	+	ENSMUSG00000008206	protein_coding	ENSMUSG00000008206	Cers4	ensembl_havana	16	35.5289	33.9068	23.2489	25.0785	36.9228	32.8055	57.124	32.2886	36.6644	29.1338	29.2882	23.6631	36.6196	35.3019	42.3623	36.8579	26.2296	33.6672	44.3052	28.0171
2	73312601	73337819	+	ENSMUSG00000008226	protein_coding	ENSMUSG00000008226	Scrn3	ensembl_havana	14	25.1043	27.2096	27.4501	29.8962	36.6865	30.0744	34.49	27.8812	34.7664	34.5499	27.7624	21.0486	40.8958	27.218	30.0995	25.3836	41.2757	45.3517	25.3832	26.711
18	56562443	56587713	+	ENSMUSG00000008301	protein_coding	ENSMUSG00000008301	Phax	ensembl_havana	11	82.9715	83.0522	73.6633	66.4248	54.1691	63.7795	69.1646	63.8425	64.6609	65.3473	72.7266	69.8971	70.2525	72.3835	71.2814	70.1368	59.5616	56.9372	66.6226	63.6524
4	72117142	72200920	-	ENSMUSG00000008305	protein_coding	ENSMUSG00000008305	Tle1	ensembl_havana	18	45.1025	42.8688	27.071	53.6216	29.3965	47.0073	41.4187	56.8802	51.2796	61.5242	34.8227	47.3924	38.5201	43.7194	39.0835	42.2076	24.267	25.1844	37.4155	38.8072
5	3571566	3584357	+	ENSMUSG00000008307	protein_coding	ENSMUSG00000008307	1700109H08Rik	ensembl_havana	11	1.5957	2.20016	1.73744	1.38601	2.32886	3.47021	3.07955	1.27759	1.32875	1.59307	1.58566	1.15843	2.64729	1.52045	1.57393	2.36136	1.86918	2.01353	1.74725	2.86088
7	100845847	100863447	-	ENSMUSG00000008318	protein_coding	ENSMUSG00000008318	Relt	ensembl_havana	10	11.8076	18.4094	11.3718	13.3642	4.92762	9.51078	6.68251	14.2441	6.67497	9.59333	6.85093	17.0441	2.44366	10.1976	9.27912	29.2576	3.95633	6.43647	11.472	31.0022
2	143063039	143072854	+	ENSMUSG00000008333	protein_coding	ENSMUSG00000008333	Snrpb2	ensembl_havana	12	93.6088	88.1641	97.5438	82.0988	77.2204	75.3144	68.6719	76.1383	74.4043	83.1178	75.4789	75.4902	57.322	75.1646	72.8552	85.5957	103.578	92.1887	78.0615	76.0905
5	125385965	125390203	-	ENSMUSG00000008348	protein_coding	ENSMUSG00000008348	Ubc	ensembl_havana	9	124.989	151.254	43.4336	45.7681	177.121	173.506	54.7528	69.4315	273.1	289	55.8239	52.6876	142.948	164.235	43.2476	43.462	145.602	181.407	220.833	314.375
7	3629985	3642487	+	ENSMUSG00000008373	protein_coding	ENSMUSG00000008373	Prpf31	ensembl_havana	16	137.931	136.857	135.765	124.501	100.306	108.634	88.9039	99.0053	108.949	112.747	118.678	125.993	125.165	122.555	138.989	147.173	108.313	93.2779	107.994	106.067
7	27486910	27490317	+	ENSMUSG00000008384	protein_coding	ENSMUSG00000008384	Sertad1	ensembl_havana	8	15.7079	17.3417	30.0087	31.4801	13.5677	26.0902	18.8771	26.3482	21.8279	24.4257	19.0568	30.7455	11.9803	14.5732	29.87	29.2576	14.7347	13.2359	27.3282	34.1739
16	8658580	8672156	-	ENSMUSG00000008393	protein_coding	ENSMUSG00000008393	Carhsp1	ensembl_havana	9	100.771	94.3113	90.9103	98.5977	217.452	147.994	179.809	95.2047	156.78	109.88	98.0059	73.5706	69.2683	55.5114	116.463	98.9147	161.863	250.325	140.3	97.5775
10	93247414	93311136	-	ENSMUSG00000008398	protein_coding	ENSMUSG00000008398	Elk3	ensembl_havana	15	78.3619	91.1407	81.6551	38.1786	25.9202	20.2746	28.485	27.1786	32.7101	27.0806	50.0201	32.1024	59.1886	64.3368	48.0018	38.4443	12.8345	17.4938	58.1176	36.9414
9	25108132	25151821	-	ENSMUSG00000008429	protein_coding	ENSMUSG00000008429	Herpud2	ensembl_havana	8	31.6285	27.242	33.1991	39.5645	33.109	41.1274	38.6164	41.1351	46.8191	45.7715	41.494	39.946	30.8161	28.4047	32.821	38.2967	32.3041	41.952	39.1956	51.3386
7	4424770	4445650	-	ENSMUSG00000008435	protein_coding	ENSMUSG00000008435	Rdh13	ensembl_havana	15	52.0168	47.0425	47.9191	37.8486	28.249	28.982	34.3668	33.9174	37.8665	35.4349	39.0409	39.4826	24.0284	25.8089	53.6742	44.9009	26.5722	27.792	49.4807	50.0637
12	81558584	81568475	-	ENSMUSG00000008438	protein_coding	ENSMUSG00000008438	Adam21	ensembl_havana	3	0.0710157	0.0001	0.15804	0.0330979	0.168851	0.192884	0.154073	0.0959114	0.158272	0.0708987	0.0599326	0.0662903	0.101915	0.111345	0.0656761	0.221468	0.155857	0.066114	0.0330651	0.0001
8	105860580	105879331	+	ENSMUSG00000008450	protein_coding	ENSMUSG00000008450	Nutf2	ensembl_havana	8	52.6905	52.2191	48.9615	45.4381	46.3053	45.7542	41.0184	42.3168	48.5906	47.5414	43.5881	48.6831	44.3575	55.0293	64.1008	61.3559	60.8388	49.3456	49.3818	45.1195
7	45617289	45621060	+	ENSMUSG00000008461	protein_coding	ENSMUSG00000008461	Fut1	ensembl_havana	6	0.106474	0.0324538	0.0001	0.0660957	0.0001	0.0001	0.215662	0.0320371	0.0950034	0.0001	0.0599326	0.0001	0.0679767	0.0371817	0.0984642	0.0001	0.0001	0.066114	0.0330651	0.0001
1	152766542	152775598	+	ENSMUSG00000008475	protein_coding	ENSMUSG00000008475	Arpc5	ensembl_havana	13	113.855	114.371	217.862	182.445	170.101	153.071	162.842	144.867	193.223	182.625	159.274	157.765	82.1988	91.1469	222.598	211.517	165.788	121.499	219.317	202.773
17	24715839	24718064	-	ENSMUSG00000008482	protein_coding	ENSMUSG00000008482	Rnf151	ensembl_havana	9	0.0355578	0.25893	0.410744	0.363076	1.04635	0.835498	0.431223	0.415283	1.39202	1.91167	0.598426	1.25772	0.373422	0.333835	0.327981	0.295257	1.05925	0.99031	0.527542	0.40434
4	91250763	91400786	-	ENSMUSG00000008489	protein_coding	ENSMUSG00000008489	Elavl2	ensembl_havana	18	0.141931	0.0324538	12.5089	6.23669	2.66636	2.63482	2.00174	1.18177	19.7716	8.92074	0.329179	0.761289	2.20609	0.0371817	4.85273	0.848677	1.58882	0.99031	3.09882	2.14568
7	25087344	25179727	-	ENSMUSG00000008496	protein_coding	ENSMUSG00000008496	Pou2f2	ensembl_havana	19	0.106474	0.744237	0.031688	0.165089	1.62011	0.44993	0.246456	0.127849	0.348079	0.318694	0.269347	0.198671	0.0001	0.22259	0.557497	0.0369947	1.80688	2.04653	0.626437	0.40434
6	138140316	138156756	+	ENSMUSG00000008540	protein_coding	ENSMUSG00000008540	Mgst1	ensembl_havana	11	20.5657	28.2126	25.1441	75.9612	160.887	150.757	187.354	86.9011	143.589	107.225	54.1486	48.7162	83.149	32.4466	14.2957	19.2222	127.97	304.226	69.6883	37.5322
4	82290173	82705751	-	ENSMUSG00000008575	protein_coding	ENSMUSG00000008575	Nfib	ensembl_havana	17	146.122	122.944	128.848	148.259	181.103	198.568	198.594	147.933	195.248	150.483	143.12	114.675	133.106	115.065	120.955	118.727	161.24	169.029	167.199	89.5237
9	48935008	48964991	-	ENSMUSG00000008590	protein_coding	ENSMUSG00000008590	Htr3b	ensembl_havana	4	0.0001	0.0001	0.0001	0.0001	0.0001	0.0001	0.0308945	0.0320371	0.0001	0.0001	0.0001	0.0001	0.0001	0.0001	0.0001	0.0001	0.0001	0.0001	0.0330651	0.0001
3	88542029	88548301	-	ENSMUSG00000008601	protein_coding	ENSMUSG00000008601	Rab25	ensembl_havana	12	0.283763	0.0971613	0.15804	0.231085	0.202601	0.385668	0.215662	0.383346	0.126638	0.460292	0.209514	0.132481	0.237668	0.185508	0.262405	0.147679	0.311614	0.429191	0.230856	0.248863
3	88553758	88569726	+	ENSMUSG00000008604	protein_coding	ENSMUSG00000008604	Ubqln4	ensembl_havana	11	343.799	305.549	178.599	190.992	187.313	169.939	176.761	174.313	165.29	163.935	223.295	227.761	271.778	286.604	169.514	190.487	214.695	194.081	175.078	181.442
16	5885355	7411527	+	ENSMUSG00000008658	protein_coding	ENSMUSG00000008658	Rbfox1	ensembl_havana	16	0.0001	0.0001	0.0001	0.0660957	0.0001	0.0001	0.123278	0.0001	0.0317345	0.0001	0.0001	0.0001	0.0001	0.0001	0.0001	0.0001	0.0001	0.0001	0.0001	0.0311954
17	33951999	33956002	-	ENSMUSG00000008668	protein_coding	ENSMUSG00000008668	Rps18	ensembl_havana	15	389.398	430.273	355.934	411.714	349.584	393.472	287.282	372.834	309.037	379.587	347.927	385.559	636.649	704.7	346.734	386.14	427.989	454.11	291.906	299.387
X	74270812	74273136	+	ENSMUSG00000008682	protein_coding	ENSMUSG00000008682	Rpl10	ensembl_havana	13	333.588	379.801	343.583	339.251	225.822	308.937	260.953	314.389	235.582	248.716	348.016	394.759	457.794	543.914	321.126	386.25	230.427	266.004	274.138	304.642
7	118104372	118116189	-	ENSMUSG00000008683	protein_coding	ENSMUSG00000008683	Rps15a	ensembl_havana	16	294.3	301.537	301.255	303.415	234.057	291.682	221.259	241.317	264.274	309.567	283.188	326.285	305.377	345.861	282.535	323.751	244.694	272.737	281.72	284.399
15	89355719	89372827	+	ENSMUSG00000008690	protein_coding	ENSMUSG00000008690	Ncaph2	ensembl_havana	15	196.685	226.768	179.294	208.778	170.81	220.095	144.734	187.024	198.791	251.406	186.738	209.79	239.639	231.316	164.399	203.585	199.836	199.263	165.386	196.43
3	103739815	103791564	-	ENSMUSG00000008730	protein_coding	ENSMUSG00000008730	Hipk1	ensembl_havana	17	230.263	244.756	135.323	211.021	136.688	161.425	137.867	165.051	141.849	126.517	138.303	159.188	159.714	222.638	134.005	161.672	133.203	125.394	148.739	203.675
7	118972047	118995212	-	ENSMUSG00000008734	protein_coding	ENSMUSG00000008734	Gprc5b	ensembl_havana	9	39.5001	19.9947	55.6581	18.0499	16.4364	6.52263	25.2208	6.80271	63.269	16.5316	21.7792	7.64508	12.9645	6.34107	44.9525	9.59271	11.5261	4.35702	47.1072	10.1372
3	100562208	100685504	-	ENSMUSG00000008763	protein_coding	ENSMUSG00000008763	Man1a2	ensembl_havana	16	164.808	142.907	129.1	165.121	173.948	178.422	149.046	148.22	153.269	130.765	131.392	120.963	143.288	138.315	124.037	119.649	181.395	190.153	138.421	152.025
7	17713238	17761133	+	ENSMUSG00000008789	protein_coding	ENSMUSG00000008789	Ceacam5	ensembl_havana	10	0.0001	0.0001	0.0001	0.0001	0.0001	0.0001	0.0308945	0.0001	0.0001	0.0001	0.0001	0.0001	0.0001	0.0001	0.0001	0.0001	0.0312514	0.0001	0.0001	0.0001
14	51918425	51920701	+	ENSMUSG00000008813	protein_coding	ENSMUSG00000008813	Tppp2	ensembl_havana	13	0.0001	0.0001	0.0001	0.0001	0.0001	0.0001	0.0001	0.0001	0.0001	0.0001	0.0001	0.0001	0.0001	0.0001	0.0001	0.0001	0.0001	0.0001	0.0001	0.0311954
12	85272398	85288439	-	ENSMUSG00000008822	protein_coding	ENSMUSG00000008822	Acyp1	ensembl_havana	15	3.97138	5.95319	6.66517	8.38156	8.06639	9.15734	4.03418	7.34564	6.80151	9.62873	9.1844	8.40627	13.7791	10.2717	13.7383	13.0608	7.13377	7.88877	6.16458	6.0948
5	134914249	134915527	-	ENSMUSG00000008843	protein_coding	ENSMUSG00000008843	Cldn13	ensembl_havana	4	0.0001	0.0001	0.0001	0.0001	0.0001	0.0001	0.0001	0.0001	0.0001	0.0354994	0.0001	0.0001	0.0001	0.0001	0.0001	0.0001	0.0001	0.0001	0.0001	0.0001
6	124304656	124330528	+	ENSMUSG00000008845	protein_coding	ENSMUSG00000008845	Cd163	ensembl_havana	9	0.0710157	0.0001	0.0001	0.0001	0.0001	0.0001	0.0001	0.0001	0.0633689	0.0001	0.0001	0.0001	0.0340383	0.0001	0.0001	0.0001	0.0001	0.0001	0.0001	0.0001
11	102194432	102230167	-	ENSMUSG00000008855	protein_coding	ENSMUSG00000008855	Hdac5	ensembl_havana	17	75.3126	128.283	65.7347	143.079	109.553	175.562	95.4631	132.124	86.1724	133.597	88.2233	126.788	108.637	132.233	81.8391	148.649	82.5824	174.376	85.5446	127.553
13	17880571	17944240	-	ENSMUSG00000008859	protein_coding	ENSMUSG00000008859	Rala	ensembl_havana	8	63.4342	59.3693	72.8104	77.6441	55.4516	61.209	67.7481	74.4137	60.7699	53.1345	63.8714	65.6609	40.6922	47.4276	70.6584	67.2959	54.9511	43.8004	82.347	78.9513
8	114418086	114425847	+	ENSMUSG00000008874	protein_coding	ENSMUSG00000008874	Clec3a	ensembl_havana	3	0.0001	0.0324538	0.0001	0.0001	0.0001	0.0001	0.0001	0.0001	0.0001	0.0001	0.0001	0.0001	0.0001	0.0001	0.0001	0.0001	0.0001	0.0001	0.0001	0.0001
8	22577075	22593814	-	ENSMUSG00000008892	protein_coding	ENSMUSG00000008892	Vdac3	ensembl_havana	12	59.4275	61.7634	62.0705	62.993	49.8491	55.8754	51.273	57.8702	50.552	73.3476	51.875	57.9828	36.4499	52.9898	74.5602	68.7348	57.6613	59.8748	57.1946	58.5216
4	107968332	108013533	+	ENSMUSG00000008932	protein_coding	ENSMUSG00000008932	Slc1a7	ensembl_havana	9	0.0001	0.0001	0.0001	0.0660957	0.0001	0.0322307	0.0308945	0.127849	0.0001	0.0001	0.0001	0.0001	0.0001	0.0001	0.0001	0.0001	0.0624028	0.0001	0.0001	0.0001
3	95111022	95123052	+	ENSMUSG00000008958	protein_coding	ENSMUSG00000008958	Vps72	ensembl_havana	14	118.926	126.6	74.8952	79.8219	80.663	79.2022	69.6881	74.765	72.2216	65.9137	82.6289	71.254	117.563	124.112	70.6256	81.8693	80.9937	92.6838	73.0178	67.6015
16	84834925	84863780	+	ENSMUSG00000008976	protein_coding	ENSMUSG00000008976	Gabpa	ensembl_havana	16	149.242	136.339	132.575	136.743	127.204	124.185	120.13	126.184	119.009	101.809	100.639	97.7301	113.083	111.282	133.185	142.413	118.344	143.284	142.179	143.319
2	172868012	172940322	-	ENSMUSG00000008999	protein_coding	ENSMUSG00000008999	Bmp7	ensembl_havana	7	0.141931	0.0324538	1.23203	3.0689	0.810104	0.44993	0.184867	0.0320371	0.158272	0.0001	0.299263	0.0001	0.40736	0.370917	0.360769	0.0738893	0.934642	0.462198	0.362716	0.155577
5	115297110	115301000	-	ENSMUSG00000009013	protein_coding	ENSMUSG00000009013	Dynll1	ensembl_havana	5	147.221	154.231	162.994	159.05	185.558	151.882	163.427	151.063	178.608	172.749	158.168	146.711	118.309	131.714	152.858	160.861	180.46	163.088	136.805	122.671
2	37350074	37359333	-	ENSMUSG00000009030	protein_coding	ENSMUSG00000009030	Pdcl	ensembl_havana	14	31.8412	36.4304	40.875	40.0925	40.6353	42.3483	43.2972	44.3927	41.7259	45.4175	36.0492	32.4003	35.1602	33.2253	34.9194	34.8287	40.6215	44.9226	36.1299	39.2736
15	79360684	79403570	-	ENSMUSG00000009035	protein_coding	ENSMUSG00000009035	Tmem184b	ensembl_havana	15	98.0411	103.079	108.094	120.541	118.126	114.61	134.387	117.497	126.095	128.075	81.7613	91.9715	48.5998	58.1812	110.561	104.301	137.347	136.946	123.817	133.617
16	88777896	88778729	+	ENSMUSG00000009047	protein_coding	ENSMUSG00000009047	Gm5965	ensembl_havana	4	0.0001	0.0001	0.0001	0.0001	0.0001	0.0001	0.0001	0.0001	0.0001	0.0001	0.0001	0.0001	0.0001	0.0001	0.0001	0.0001	0.0001	0.0001	0.0001	0.0001
10	74957477	75032587	-	ENSMUSG00000009070	protein_coding	ENSMUSG00000009070	Rsph14	ensembl_havana	14	0.0001	0.0001	0.094864	0.0001	0.0001	0.0001	0.0001	0.0001	0.0001	0.106298	0.0001	0.0662903	0.0001	0.0001	0.16404	0.0001	0.0001	0.0001	0.0989953	0.0622908
11	4765845	4849537	-	ENSMUSG00000009073	protein_coding	ENSMUSG00000009073	Nf2	ensembl_havana	16	194.061	206.191	148.179	157.532	216.575	161.971	152.71	155.534	200.974	183.51	164.27	162.828	155.675	199.685	162.465	148.095	226.844	172.594	143.201	149.569
11	4736892	4746779	-	ENSMUSG00000009075	protein_coding	ENSMUSG00000009075	Cabp7	ensembl_havana	2	0.0001	0.0001	0.063276	0.0660957	0.0338501	0.0322307	0.0308945	0.0001	0.158272	0.247896	0.0599326	0.0331952	0.0340383	0.0001	0.0984642	0.0001	0.0001	0.0001	0.0660302	0.0001
11	4704678	4737670	+	ENSMUSG00000009076	protein_coding	ENSMUSG00000009076	Zmat5	ensembl_havana	10	14.9279	19.2506	13.1091	16.433	15.5589	20.7244	15.1818	21.3022	16.3235	22.7619	19.1166	19.2284	24.4696	28.9609	17.8368	17.2299	16.4169	20.0023	17.076	19.4969
11	5069689	5099267	-	ENSMUSG00000009079	protein_coding	ENSMUSG00000009079	Ewsr1	ensembl_havana	16	500.452	478.351	417.941	446.659	355.322	419.563	350.195	373.154	366.77	409.677	464.72	458.5	476.291	479.577	357.423	437.977	399.392	415.294	409.031	434.092
11	4986824	5042792	+	ENSMUSG00000009090	protein_coding	ENSMUSG00000009090	Ap1b1	ensembl_havana	17	103.643	103.015	100.482	105.956	126.833	110.851	122.932	137.521	140.236	163.297	126.875	131.057	115.221	115.732	110.725	100.722	127.316	131.368	115.774	131.534
10	75893413	75895942	+	ENSMUSG00000009092	protein_coding	ENSMUSG00000009092	Derl3	ensembl_havana	5	1.48933	1.2619	0.379156	0.660057	1.45136	1.1568	1.26268	1.46921	1.32875	1.52227	1.79508	0.695098	33.5991	15.7598	0.85259	0.701098	0.90349	4.09297	0.857193	0.0311954
10	75814943	75822544	-	ENSMUSG00000009093	protein_coding	ENSMUSG00000009093	Gstt4	ensembl_havana	7	0.0001	0.0001	0.031688	0.0001	0.0001	0.0001	0.0001	0.0001	0.0001	0.0708987	0.0001	0.0001	0.0001	0.0001	0.0001	0.0001	0.0312514	0.0001	0.0001	0.0001
16	18580979	18590672	-	ENSMUSG00000009097	protein_coding	ENSMUSG00000009097	Tbx1	ensembl_havana	10	0.0001	0.0001	0.0001	0.0330979	0.0001	0.096492	0.0308945	0.0001	0.0317345	0.0354994	0.0300163	0.0001	0.0340383	0.0001	0.0001	0.0001	0.0001	0.0001	0.0001	0.0933862
3	108092789	108101433	+	ENSMUSG00000009108	protein_coding	ENSMUSG00000009108	Gnat2	ensembl_havana	15	1.20567	1.77956	1.20044	0.891042	1.58636	1.06041	0.800758	0.67078	0.980768	1.20368	2.00449	1.78724	3.6315	3.00372	2.29526	1.54968	1.43306	1.48542	1.15388	1.02625
6	120836212	120892843	+	ENSMUSG00000009112	protein_coding	ENSMUSG00000009112	Bcl2l13	ensembl_havana	4	138.428	142.648	108.126	124.336	135.034	150.693	133.31	143.047	124.893	129.385	133.158	136.418	150.483	149.18	126.824	121.974	128.063	140.379	122.103	140.551
10	76449081	76461111	+	ENSMUSG00000009114	protein_coding	ENSMUSG00000009114	2610028H24Rik	ensembl_havana	17	0.0001	0.0324538	0.0001	0.0330979	0.0001	0.0001	0.0001	0.0639743	0.0001	0.0354994	0.0001	0.0001	0.0001	0.0001	0.0001	0.0369947	0.0001	0.0001	0.0001	0.0001
10	76562272	76570202	+	ENSMUSG00000009115	protein_coding	ENSMUSG00000009115	Spatc1l	ensembl_havana	5	0.0710157	0.0324538	0.031688	0.0330979	0.0338501	0.0322307	0.0001	0.0320371	0.0950034	0.0001	0.0599326	0.0993855	0.169792	0.148427	0.0001	0.0001	0.0001	0.033107	0.0660302	0.0001
6	83057844	83067319	+	ENSMUSG00000009145	protein_coding	ENSMUSG00000009145	Dqx1	ensembl_havana	6	0.709257	1.06777	0.758212	0.990036	0.978854	1.76729	1.01632	1.24565	1.20221	1.09748	1.67541	1.72105	2.20609	1.33504	0.918166	0.774888	0.529674	1.12234	0.692367	1.08844
11	82115185	82116800	+	ENSMUSG00000009185	protein_coding	ENSMUSG00000009185	Ccl8	ensembl_havana	2	0.0001	0.0324538	0.0001	0.0001	0.0338501	0.0001	0.0001	0.0001	0.0633689	0.0001	0.0001	0.0001	0.0001	0.0001	0.0328881	0.0001	0.0001	0.0001	0.0001	0.0001
2	74520291	74579436	-	ENSMUSG00000009207	protein_coding	ENSMUSG00000009207	Lnpk	ensembl_havana	15	33.3305	34.2627	41.949	32.14	27.3377	26.4437	33.6585	36.7598	30.9702	39.2934	34.7928	40.3431	20.9401	27.8114	39.1491	37.8171	36.0111	24.3923	34.3827	39.9577
11	106365472	106377559	+	ENSMUSG00000009210	protein_coding	ENSMUSG00000009210	Prr29	ensembl_havana	10	0.0001	0.0001	0.0001	0.0330979	0.0001	0.0001	0.0001	0.0001	0.0001	0.0001	0.0001	0.0001	0.0001	0.0001	0.0001	0.0001	0.0001	0.0001	0.0001	0.0001
2	27061636	27072180	-	ENSMUSG00000009214	protein_coding	ENSMUSG00000009214	Mymk	ensembl_havana	9	0.0001	0.0001	0.0001	0.0001	0.0001	0.0001	0.0001	0.0001	0.0001	0.0001	0.0001	0.0001	0.0001	0.0001	0.0001	0.0001	0.0001	0.0001	0.0001	0.0001
2	27110380	27142492	-	ENSMUSG00000009216	protein_coding	ENSMUSG00000009216	Fam163b	ensembl_havana	7	0.0001	0.0001	0.0001	0.0001	0.0001	0.0001	0.0001	0.0001	0.0001	0.0354994	0.0001	0.0001	0.0001	0.0001	0.0001	0.0001	0.0001	0.0001	0.0001	0.0001
7	143069153	143094643	-	ENSMUSG00000009246	protein_coding	ENSMUSG00000009246	Trpm5	ensembl_havana	14	0.0001	0.0001	0.0001	0.0001	0.0001	0.0001	0.0308945	0.0001	0.0001	0.0001	0.0001	0.0001	0.0001	0.0001	0.0001	0.0001	0.0001	0.033107	0.0001	0.0001
7	142966829	142969265	-	ENSMUSG00000009248	protein_coding	ENSMUSG00000009248	Ascl2	ensembl_havana	6	0.0355578	0.0001	0.0001	0.0330979	0.0001	0.0643614	0.0001	0.0001	0.0001	0.0708987	0.0300163	0.0001	0.0001	0.0001	0.0984642	0.0369947	0.0001	0.0001	0.0001	0.0311954
6	48569696	48572790	-	ENSMUSG00000009281	protein_coding	ENSMUSG00000009281	Rarres2	ensembl_havana	6	0.0355578	0.388345	0.189628	0.231085	3.98262	2.21712	2.2789	0.574969	5.44123	2.93825	0.748007	0.264861	0.101915	0.0371817	0.754226	0.405941	4.4236	2.04653	0.329751	0.311054
10	77581720	77598733	+	ENSMUSG00000009291	protein_coding	ENSMUSG00000009291	Pttg1ip	ensembl_havana	13	133.18	111.006	168.364	142.617	107.899	116.024	141.593	131.453	170.795	134.695	144.586	118.712	124.18	102.531	141.481	103.231	105.354	93.1459	181.506	142.417
10	77907722	77970564	-	ENSMUSG00000009292	protein_coding	ENSMUSG00000009292	Trpm2	ensembl_havana	18	0.0001	0.0324538	0.0001	0.0001	0.0338501	0.0322307	0.0308945	0.0001	0.0317345	0.0001	0.0300163	0.0001	0.644928	0.0742633	0.0001	0.0001	0.0001	0.033107	0.0001	0.0622908
10	77622275	77645994	+	ENSMUSG00000009293	protein_coding	ENSMUSG00000009293	Ube2g2	ensembl_havana	17	80.5603	82.0493	71.926	74.8722	60.0079	66.3178	82.4063	76.9686	79.4342	87.1179	76.7653	78.1047	78.771	76.3513	70.8551	70.3582	71.3991	57.2012	78.6878	75.6552
11	87793581	87804414	+	ENSMUSG00000009350	protein_coding	ENSMUSG00000009350	Mpo	ensembl_havana	13	0.0001	0.0001	0.0001	0.0001	0.0001	0.0001	0.0001	0.0001	0.0633689	0.0001	0.0001	0.0331952	0.0001	0.0371817	0.0984642	0.0001	0.0001	0.066114	0.0001	0.0001
11	87806428	87828290	-	ENSMUSG00000009356	protein_coding	ENSMUSG00000009356	Lpo	ensembl_havana	12	0.0355578	0.0971613	0.0001	0.0001	0.0001	0.0001	0.0001	0.0320371	0.0001	0.0001	0.0300163	0.0331952	0.0001	0.0001	0.0001	0.0001	0.0001	0.0001	0.0001	0.0001
6	17463800	17573981	+	ENSMUSG00000009376	protein_coding	ENSMUSG00000009376	Met	ensembl_havana	15	175.694	132.23	274.658	155.387	190.52	145.488	183.843	75.1482	217.962	126.73	240.437	148.498	256.235	191.712	162.596	101.719	168.996	154.143	212.691	66.3888
19	34668403	34747290	-	ENSMUSG00000009378	protein_coding	ENSMUSG00000009378	Slc16a12	ensembl_havana	4	0.0001	0.0648075	0.031688	0.0990936	0.0001	0.0001	0.0308945	0.22366	0.158272	0.0708987	0.0001	0.0001	0.0001	0.0371817	0.0001	0.0369947	0.0312514	0.066114	0.0330651	0.0933862
6	115134902	115282007	+	ENSMUSG00000009394	protein_coding	ENSMUSG00000009394	Syn2	ensembl_havana	13	0.106474	0.0001	0.063276	0.0660957	0.10135	0.128623	0.154073	0.0001	0.126638	0.0354994	0.359096	0.132481	0.0340383	0.0371817	0.360769	0.0369947	0.0001	0.066114	0.296786	0.155577
X	20933395	20950609	-	ENSMUSG00000009406	protein_coding	ENSMUSG00000009406	Elk1	ensembl_havana	13	39.5356	46.5895	34.7785	44.5472	31.7927	38.3963	36.0605	44.3927	32.4571	32.2489	33.3568	36.9343	39.674	47.5017	37.9687	45.3805	24.2047	32.0829	37.7781	43.7513
1	135434580	135688106	-	ENSMUSG00000009418	protein_coding	ENSMUSG00000009418	Nav1	ensembl_havana	16	85.1699	113.594	118.487	61.7391	184.343	102.368	167.615	86.1027	92.2778	80.4274	135.192	97.7963	82.2327	106.091	97.7413	73.0515	146.879	151.04	153.552	87.1916
13	98839019	98926385	-	ENSMUSG00000009470	protein_coding	ENSMUSG00000009470	Tnpo1	ensembl_havana	17	425.14	354.403	422.11	380.036	328.49	307.073	306.806	317.168	286.513	259.761	344.337	378.543	265.33	289.497	402.9	390.714	343.506	281.484	352.562	370.688
7	46376474	46379100	+	ENSMUSG00000009471	protein_coding	ENSMUSG00000009471	Myod1	ensembl_havana	4	0.0355578	0.0648075	0.0001	0.0001	0.0001	0.0001	0.0001	0.0001	0.0001	0.0001	0.0001	0.0331952	0.135853	0.0371817	0.0328881	0.0001	0.0001	0.0001	0.0001	0.0311954
7	46240987	46311435	+	ENSMUSG00000009487	protein_coding	ENSMUSG00000009487	Otog	ensembl_havana	10	0.0001	0.0648075	0.0001	0.0001	0.0001	0.0001	0.0001	0.0001	0.0001	0.0001	0.0001	0.0001	0.0340383	0.0371817	0.0001	0.0001	0.0001	0.0001	0.0001	0.0622908
18	68300355	68324853	+	ENSMUSG00000009535	protein_coding	ENSMUSG00000009535	Rnmt	ensembl_havana	13	105.771	96.4467	70.5993	67.4807	68.1754	66.4785	73.6914	62.7247	76.682	67.6483	78.7996	66.1242	86.3392	85.77	74.593	79.0653	68.8447	72.1864	76.1825	67.9746
7	143106362	143427043	+	ENSMUSG00000009545	protein_coding	ENSMUSG00000009545	Kcnq1	ensembl_havana	14	0.0355578	0.0324538	0.126452	0.0990936	0.0338501	0.0001	0.0308945	0.0320371	0.0950034	0.0354994	0.0300163	0.0001	0.0001	0.0001	0.0328881	0.0738893	0.0312514	0.0001	0.659402	0.124482
2	118475850	118479712	-	ENSMUSG00000009549	protein_coding	ENSMUSG00000009549	Srp14	ensembl_havana	14	107.296	107.285	105.251	88.7973	95.7493	81.1301	96.8489	96.9293	106.766	104.676	102.703	102.727	78.228	85.9183	109.971	101.128	96.3825	99.0871	117.224	103.05
2	32732620	32741017	-	ENSMUSG00000009551	protein_coding	ENSMUSG00000009551	6330409D20Rik	ensembl_havana	2	0.0001	0.0001	0.0001	0.0001	0.0338501	0.0001	0.0616891	0.0001	0.0001	0.0708987	0.0001	0.0001	0.0001	0.0001	0.0001	0.0001	0.0312514	0.0001	0.13196	0.0001
2	32705784	32713077	-	ENSMUSG00000009555	protein_coding	ENSMUSG00000009555	Cdk9	ensembl_havana	16	104.743	106.25	98.8073	98.3007	103.782	95.2676	97.2184	86.5178	99.1741	101.101	80.7143	76.3175	87.018	92.3335	95.5773	100.575	96.8186	107.174	95.1704	90.8919
2	32757234	32762245	+	ENSMUSG00000009563	protein_coding	ENSMUSG00000009563	Tor2a	ensembl_havana	16	28.4373	27.7273	29.219	29.5992	29.6327	26.4437	25.498	25.4859	27.0792	28.9214	23.8434	25.5827	18.4626	20.8029	32.9849	30.4013	29.9366	26.1747	26.1414	33.8319
2	32682609	32704146	-	ENSMUSG00000009566	protein_coding	ENSMUSG00000009566	Fpgs	ensembl_havana	12	119.068	114.371	79.3807	59.2972	77.7604	54.5259	71.6282	51.9938	90.8226	76.3211	87.4753	76.9132	98.591	114.063	79.6423	71.2806	84.2958	74.0678	60.8537	49.5662
16	13256481	13417530	+	ENSMUSG00000009569	protein_coding	ENSMUSG00000009569	Mrtfb	ensembl_havana	14	53.9315	57.9133	52.4362	69.2626	67.2979	73.5794	55.7998	67.9304	54.6012	55.2231	45.6524	59.77	52.2312	55.363	60.3301	72.166	47.506	70.206	65.0073	77.8941
15	103191544	103239817	-	ENSMUSG00000009575	protein_coding	ENSMUSG00000009575	Cbx5	ensembl_havana	14	326.319	312.44	402.589	381.62	364.94	330.882	329.963	316.497	407.673	414.208	313.732	329.694	305.275	272.439	382.145	384.885	452.941	410.904	342.409	424.95
5	87885029	87894175	+	ENSMUSG00000009580	protein_coding	ENSMUSG00000009580	Odam	ensembl_havana	15	0.0001	0.0001	0.0001	0.0001	0.0001	0.0001	0.0001	0.0001	0.0001	0.0001	0.0001	0.0001	0.0001	0.0001	0.0001	0.0001	0.0001	0.0001	0.0001	0.0001
15	79891659	79915907	+	ENSMUSG00000009585	protein_coding	ENSMUSG00000009585	Apobec3	ensembl_havana	18	30.3875	40.5717	25.2073	31.1501	32.5015	38.0428	23.4039	33.8215	35.1143	42.5501	34.3739	29.9181	44.663	41.717	30.2963	36.7472	36.8833	50.1707	24.9547	29.4163
11	116765025	116775508	-	ENSMUSG00000009588	protein_coding	ENSMUSG00000009588	St6galnac1	ensembl_havana	9	0.0001	0.0324538	0.0001	0.0001	0.0001	0.0001	0.0001	0.0001	0.0001	0.0001	0.0001	0.0662903	0.0001	0.0371817	0.0001	0.0001	0.0001	0.0001	0.0001	0.0001
X	134460118	134476491	-	ENSMUSG00000009596	protein_coding	ENSMUSG00000009596	Taf7l	ensembl_havana	9	0.0710157	0.0001	0.063276	0.0001	0.0001	0.0322307	0.123278	0.0320371	0.0317345	0.141697	0.269347	0.0331952	1.22188	0.778815	0.0328881	0.0369947	0.0624028	0.0001	0.0330651	0.0311954
2	27188393	27248338	-	ENSMUSG00000009614	protein_coding	ENSMUSG00000009614	Sardh	ensembl_havana	16	52.0168	43.5483	46.466	32.074	104.052	60.7271	102.607	58.4131	101.135	102.163	47.4174	29.8188	72.7639	28.4047	49.9363	36.9316	93.4543	81.5604	67.5127	25.4983
2	27262104	27427034	-	ENSMUSG00000009621	protein_coding	ENSMUSG00000009621	Vav2	ensembl_havana	18	50.953	47.366	70.0623	47.154	101.183	54.3331	75.5391	44.6163	88.2602	52.9221	64.739	43.5533	34.753	32.0016	55.0841	41.4328	114.918	100.44	66.7874	37.9054
8	33516738	33585583	+	ENSMUSG00000009628	protein_coding	ENSMUSG00000009628	Tex15	ensembl_havana	14	1.06384	1.13248	0.505508	0.825046	1.38386	0.867628	0.431223	0.606906	2.08797	3.07984	0.448844	0.662003	0.20373	3.15204	0.229616	0.369047	1.27731	1.98052	0.527542	1.24392
8	33599625	33619442	+	ENSMUSG00000009630	protein_coding	ENSMUSG00000009630	Ppp2cb	ensembl_havana	10	132.542	110.229	130.711	117.637	127.238	118.948	121.023	117.593	136.598	135.65	105.485	112.391	78.4655	93.2605	159.383	124.704	139.184	117.208	127.509	140.116
1	193272161	193273218	-	ENSMUSG00000009633	protein_coding	ENSMUSG00000009633	G0s2	ensembl_havana	3	0.0355578	0.0324538	0.031688	0.0001	0.0001	0.0001	0.0001	0.0959114	0.0001	0.0354994	0.0001	0.0662903	0.0001	0.0001	0.0001	0.110784	0.0001	0.033107	0.0989953	0.155577
4	117674681	117682274	-	ENSMUSG00000009640	protein_coding	ENSMUSG00000009640	Dmap1	ensembl_havana	11	27.2317	29.9597	25.9654	31.2821	23.6252	28.5	25.9599	31.9372	27.7752	31.0453	28.2112	25.8143	30.6804	30.6296	25.7715	32.0616	21.6192	21.4877	26.2403	30.7845
10	59403660	59421977	+	ENSMUSG00000009646	protein_coding	ENSMUSG00000009646	Pla2g12b	ensembl_havana	13	0.0001	0.0324538	0.031688	0.0330979	0.0338501	0.096492	0.0001	0.0001	0.0633689	0.0708987	0.0001	0.0001	0.0001	0.0001	0.0001	0.0001	0.0312514	0.0001	0.0330651	0.0622908
10	59446984	59616693	-	ENSMUSG00000009647	protein_coding	ENSMUSG00000009647	Mcu	ensembl_havana	13	42.9041	40.2805	55.4686	50.5858	42.154	41.9949	59.5875	47.4906	49.0019	53.6301	51.8151	52.4228	31.8682	42.7553	49.051	50.9516	39.2197	54.1316	58.1835	51.8672
10	59422958	59441779	-	ENSMUSG00000009654	protein_coding	ENSMUSG00000009654	Oit3	ensembl_havana	4	1.06384	0.77659	1.29521	0.858044	0.472602	0.417799	0.33884	0.191723	1.13894	0.920483	0.837756	0.992955	0.475237	0.741733	1.24605	0.442836	0.280462	0.825275	0.923123	0.528722
X	100838648	101059668	-	ENSMUSG00000009670	protein_coding	ENSMUSG00000009670	Tex11	ensembl_havana	11	0.0001	0.129515	0.0001	0.0330979	0.0001	0.0322307	0.0308945	0.127849	0.0001	0.0708987	0.0001	0.0001	0.237668	5.37694	0.0328881	0.0738893	0.0001	0.0001	0.0001	0.0933862
10	75060592	75184922	+	ENSMUSG00000009681	protein_coding	ENSMUSG00000009681	Bcr	ensembl_havana	10	74.7807	85.2199	83.2345	112.424	89.1005	105.003	104.301	86.3901	85.0335	66.7633	98.9333	74.4642	118.988	101.975	102.627	85.8171	66.3837	81.8905	85.4457	68.3478
7	31032722	31042482	-	ENSMUSG00000009687	protein_coding	ENSMUSG00000009687	Fxyd5	ensembl_havana	14	12.9068	4.62669	16.4574	3.26689	5.13012	1.02828	1.81698	0.862403	2.72066	0.849685	8.46641	2.58152	4.20845	2.44749	14.1318	4.8333	3.3956	2.97073	9.9226	2.82978
X	7822289	7838281	+	ENSMUSG00000009731	protein_coding	ENSMUSG00000009731	Kcnd1	ensembl_havana	4	2.12757	3.17077	2.1165	1.38601	4.69137	3.21317	6.00503	2.04408	3.38499	2.05326	3.35072	1.22462	4.81934	2.41041	1.04932	1.25452	4.4859	6.43647	2.30766	1.49268
15	100498012	100552009	-	ENSMUSG00000009733	protein_coding	ENSMUSG00000009733	Tfcp2	ensembl_havana	9	11.0984	17.9564	10.1714	17.225	14.9514	21.1742	11.856	21.7812	13.4447	21.6999	13.971	14.562	25.0466	24.1032	10.9513	16.0862	13.1771	20.2004	9.1644	13.4955
13	18121098	18397687	-	ENSMUSG00000009734	protein_coding	ENSMUSG00000009734	Pou6f2	ensembl_havana	18	0.0001	0.0001	0.0001	0.0001	0.0001	0.0001	0.0001	0.0320371	0.0001	0.0001	0.0001	0.0001	0.0001	0.0001	0.0001	0.0001	0.0001	0.0001	0.0001	0.0001
15	100575318	100599985	-	ENSMUSG00000009739	protein_coding	ENSMUSG00000009739	Pou6f1	ensembl_havana	17	2.73035	2.78252	6.69675	8.84353	8.70764	9.99274	11.4865	12.1362	6.45353	8.46055	3.23106	3.07795	2.37578	2.15084	4.00024	9.6296	4.67281	4.98416	5.70306	6.71671
9	113930934	113977203	+	ENSMUSG00000009741	protein_coding	ENSMUSG00000009741	Ubp1	ensembl_havana	15	149.916	156.334	109.168	112.226	119.881	131.35	119.976	112.642	93.3534	86.6223	140.756	131.818	125.436	153.036	94.3642	127.582	119.621	99.7803	125.696	120.588
1	132316126	132333489	+	ENSMUSG00000009772	protein_coding	ENSMUSG00000009772	Nuak2	ensembl_havana	15	6.45343	2.68546	18.4475	10.8894	9.85514	6.55476	3.69544	1.08596	11.7048	6.44278	10.77	3.60747	1.35763	1.11255	12.3612	14.4628	10.2178	3.53185	14.8014	8.116
9	78109192	78172108	+	ENSMUSG00000009828	protein_coding	ENSMUSG00000009828	Ick	ensembl_havana	15	50.4212	47.6572	33.9256	32.965	30.6115	31.9701	30.3327	37.0791	30.3059	30.7975	37.6049	34.4853	37.1965	45.9072	26.0666	29.7003	31.6188	25.0194	34.2179	33.8008
4	140961203	140979194	+	ENSMUSG00000009863	protein_coding	ENSMUSG00000009863	Sdhb	ensembl_havana	14	177.679	155.169	124.646	120.013	92.3405	105.517	112.924	121.393	135.585	141.031	127.055	111.762	132.156	137.61	142.759	119.576	94.015	90.8024	130.509	120.433
2	152754173	152765038	+	ENSMUSG00000009876	protein_coding	ENSMUSG00000009876	Cox4i2	ensembl_havana	13	0.0001	0.0324538	0.0001	0.0330979	0.0338501	0.0001	0.0308945	0.0001	0.0950034	0.0001	0.0599326	0.0331952	0.0340383	0.0742633	0.0001	0.0001	0.0001	0.066114	0.0001	0.0001
11	59407134	59451187	-	ENSMUSG00000009894	protein_coding	ENSMUSG00000009894	Snap47	ensembl_havana	15	49.4638	66.293	62.8602	90.9422	111.679	109.18	104.27	100.251	96.7699	95.6846	85.4111	67.6135	114.576	97.1912	78.4947	74.5642	101.616	133.315	70.5784	90.1457
11	59248033	59290753	-	ENSMUSG00000009900	protein_coding	ENSMUSG00000009900	Wnt3a	ensembl_havana	7	0.0001	0.0001	0.0001	0.0001	0.0001	0.0001	0.0001	0.0001	0.0317345	0.0001	0.0001	0.0001	0.0001	0.0001	0.0001	0.0001	0.0001	0.0001	0.0001	0.0311954
1	106720459	106759728	-	ENSMUSG00000009905	protein_coding	ENSMUSG00000009905	Kdsr	ensembl_havana	5	33.4369	46.1689	24.0386	39.5975	28.2152	33.8016	19.3083	33.1828	27.3955	38.9394	33.985	41.9317	44.5611	46.6859	25.8699	37.1161	22.211	33.2382	28.3831	35.6976
1	106764071	106796729	-	ENSMUSG00000009907	protein_coding	ENSMUSG00000009907	Vps4b	ensembl_havana	17	105.984	110.359	96.4698	114.338	113.806	109.534	101.16	100.826	107.399	111.189	101.237	102.529	119.361	96.8945	94.7576	109.061	119.185	123.578	103.642	120.775
9	44407139	44410428	+	ENSMUSG00000009927	protein_coding	ENSMUSG00000009927	Rps25	ensembl_havana	9	286.003	305.97	243.259	240.62	216.406	245.029	204.26	247.162	189.174	212.573	268.26	263.636	336.736	415.611	236.304	270.401	224.944	261.647	213.251	222.519
X	134944526	134964755	-	ENSMUSG00000009941	protein_coding	ENSMUSG00000009941	Nxf2	ensembl_havana	10	0.141931	0.355991	0.189628	0.231085	0.0676003	0.096492	0.246456	0.255597	0.0950034	0.283295	0.269347	0.364147	1.05219	0.519243	0.0656761	0.405941	0.405068	0.33017	0.296786	0.279959
X	74281912	74290152	+	ENSMUSG00000009995	protein_coding	ENSMUSG00000009995	Taz	ensembl_havana	17	15.0342	18.7006	16.6154	22.4716	17.3139	26.1545	21.9874	19.354	19.5186	16.213	26.7154	23.2991	34.3457	30.8521	19.6729	26.7118	12.9591	22.2798	15.3948	20.4298
11	114765388	114790740	+	ENSMUSG00000010021	protein_coding	ENSMUSG00000010021	Kif19a	ensembl_havana	13	0.0710157	0.161869	0.0001	0.0001	0.10135	0.0001	0.0001	0.0001	0.0950034	0.0354994	0.0001	0.0001	0.0679767	0.0001	0.0001	0.0369947	0.0312514	0.132128	0.0001	0.0001
11	61223417	61267465	-	ENSMUSG00000010025	protein_coding	ENSMUSG00000010025	Aldh3a2	ensembl_havana	19	39.6065	60.5016	28.9347	92.3941	50.1191	166.694	61.9279	135.988	62.0036	88.7109	52.7425	71.7835	63.5666	63.4098	44.264	56.9654	48.4405	83.9369	39.3275	70.711
9	107547298	107551320	+	ENSMUSG00000010044	protein_coding	ENSMUSG00000010044	Zmynd10	ensembl_havana	12	0.248305	0.291284	0.094864	0.363076	0.10135	0.0322307	0.400429	0.22366	0.316445	0.283295	0.179598	0.397242	0.0340383	0.148427	0.0656761	0.184573	0.187008	0.132128	0.263821	0.124482
9	107533945	107538674	+	ENSMUSG00000010045	protein_coding	ENSMUSG00000010045	Tmem115	ensembl_havana	2	50.563	40.6364	44.9498	48.078	40.264	42.2198	45.3912	42.5084	40.4922	38.0544	49.3022	51.2645	38.3844	45.4993	47.9363	47.6311	40.3723	31.5548	49.1511	47.2962
9	107567945	107572780	+	ENSMUSG00000010047	protein_coding	ENSMUSG00000010047	Hyal2	ensembl_havana	12	61.6258	73.4432	60.8386	74.0803	68.6817	67.9886	56.6004	69.655	38.5941	40.8864	62.3157	63.8407	44.6969	68.8978	61.281	76.4827	60.4961	58.0924	49.8104	59.0814
9	107587642	107593386	+	ENSMUSG00000010048	protein_coding	ENSMUSG00000010048	Ifrd2	ensembl_havana	10	122.649	135.045	85.414	89.8203	93.0155	86.3995	69.103	77.4157	60.9281	53.5239	119.516	120.632	160.189	182.034	99.3479	107.068	89.6849	81.0983	63.9524	80.475
9	107576927	107581711	+	ENSMUSG00000010051	protein_coding	ENSMUSG00000010051	Hyal1	ensembl_havana	15	0.957462	2.10309	0.284392	1.45201	1.41761	2.08859	2.00174	3.16188	1.23384	2.26566	1.52583	1.91962	2.88486	3.15204	0.262405	0.922466	1.0281	2.31059	0.989053	1.30611
9	107563255	107566113	+	ENSMUSG00000010054	protein_coding	ENSMUSG00000010054	Tusc2	ensembl_havana	4	15.3179	18.3447	13.7725	19.2049	16.3014	16.9651	16.7831	18.7153	18.2215	21.4521	21.8988	23.266	17.8856	19.8017	15.8695	17.9678	16.3234	18.418	17.3727	20.0566
9	107542226	107545707	+	ENSMUSG00000010057	protein_coding	ENSMUSG00000010057	Nprl2	ensembl_havana	8	16.2398	20.8036	11.0243	15.3441	15.7952	17.19	18.2305	18.6514	11.863	13.8766	18.0695	18.2686	18.9716	21.8041	11.5087	13.2453	13.6444	15.3814	16.9771	18.3464
9	107650634	107669531	-	ENSMUSG00000010064	protein_coding	ENSMUSG00000010064	Slc38a3	ensembl_havana	15	0.106474	0.0971613	0.189628	0.693055	1.14761	1.60663	0.462018	1.72471	0.790961	1.62847	0.269347	0.496527	0.339483	0.593407	0.16404	0.184573	0.716582	2.90472	0.296786	0.186672
9	107399612	107529344	+	ENSMUSG00000010066	protein_coding	ENSMUSG00000010066	Cacna2d2	ensembl_havana	15	0.0001	0.129515	0.031688	0.0990936	0.0338501	0.0643614	0.0308945	0.0639743	0.0317345	0.106298	0.269347	0.231766	0.101915	0.0371817	0.0656761	0.0001	0.0312514	0.066114	0.0001	0.0933862
9	107551555	107562268	+	ENSMUSG00000010067	protein_coding	ENSMUSG00000010067	Rassf1	ensembl_havana	13	71.1995	65.1929	88.7308	56.9874	61.5941	49.0315	68.9491	63.4911	73.2971	68.7811	86.9369	95.4465	28.6441	45.0543	77.9701	75.5603	68.7512	45.5168	90.2915	87.4715
11	94489599	94499975	-	ENSMUSG00000010080	protein_coding	ENSMUSG00000010080	Epn3	ensembl_havana	15	4.21958	2.23251	4.26448	7.82059	55.8228	28.7892	51.3654	7.34564	31.4764	10.0181	18.9969	4.17009	1.18794	0.519243	14.7875	3.94783	51.0261	58.5545	11.0764	0.80858
11	61448442	61454132	-	ENSMUSG00000010086	protein_coding	ENSMUSG00000010086	Rnf112	ensembl_havana	17	1.20567	1.42367	3.44319	10.0974	5.33262	1.60663	8.28383	1.53308	8.38323	2.97365	5.95344	0.860574	3.52969	2.18792	1.54114	0.442836	8.34867	6.1064	2.99993	0.559817
19	8706882	8723370	-	ENSMUSG00000010095	protein_coding	ENSMUSG00000010095	Slc3a2	ensembl_havana	13	300.328	259.898	269.983	209.965	260.787	196.286	234.439	222.059	282.369	289.885	257.998	282.6	259.832	266.877	360.636	305.82	314.941	256.762	253.436	239.124
19	8757073	8770923	+	ENSMUSG00000010097	protein_coding	ENSMUSG00000010097	Nxf1	ensembl_havana	15	238.986	244.142	211.419	189.474	260.146	236.675	209.834	197.851	202.84	250.663	243.339	248.445	236.89	273.477	171.023	203.88	281.422	291.716	201.186	206.163
19	8741413	8756070	+	ENSMUSG00000010110	protein_coding	ENSMUSG00000010110	Stx5a	ensembl_havana	17	56.059	68.2342	56.2899	68.0087	94.5005	88.8736	86.2556	78.5335	86.9316	104.216	69.9145	57.1554	108.705	95.745	46.0673	61.2821	84.6073	125.823	66.6885	67.4771
11	61343401	61378346	-	ENSMUSG00000010122	protein_coding	ENSMUSG00000010122	Slc47a1	ensembl_havana	14	1.98574	0.0648075	0.0001	12.3413	0.0338501	10.2819	0.0308945	11.5294	0.189907	2.93825	0.0898489	6.51985	1.86671	2.03959	0.0984642	0.0001	0.0001	0.264156	0.0001	0.590913
3	105996957	106014647	-	ENSMUSG00000010136	protein_coding	ENSMUSG00000010136	Pifo	ensembl_havana	14	0.0355578	0.0001	0.0001	0.0001	0.0001	0.0001	0.0001	0.0320371	0.0001	0.0001	0.0898489	0.0001	0.271607	0.0371817	0.0001	0.0001	0.0001	0.0001	0.0001	0.0001
11	61126755	61149373	+	ENSMUSG00000010142	protein_coding	ENSMUSG00000010142	Tnfrsf13b	ensembl_havana	12	0.0001	0.0001	0.0001	0.0001	0.0338501	0.096492	0.0001	0.159786	0.0001	0.0001	0.0001	0.0662903	0.0001	0.0001	0.0001	0.0001	0.0001	0.033107	0.0001	0.0622908
8	123332713	123369516	+	ENSMUSG00000010154	protein_coding	ENSMUSG00000010154	Spire2	ensembl_havana	7	50.6694	54.678	10.9295	6.66567	17.2464	10.6675	11.7944	5.97235	20.4992	16.8856	31.0532	16.7793	54.3693	44.3127	19.509	10.4782	20.2485	21.2896	19.7462	11.4121
1	190118035	190170715	-	ENSMUSG00000010175	protein_coding	ENSMUSG00000010175	Prox1	ensembl_havana	13	0.0001	0.0648075	0.094864	0.0660957	0.135101	0.160753	0.0001	0.0959114	0.0317345	0.0001	0.179598	0.0662903	0.0340383	0.111345	0.0656761	0.0369947	0.0001	0.0001	0.0989953	0.124482
9	21074158	21092009	-	ENSMUSG00000010205	protein_coding	ENSMUSG00000010205	Raver1	ensembl_havana	11	0.0001	0.0001	0.031688	0.0001	0.0001	0.0001	0.0001	0.0001	0.0001	0.0001	0.0001	0.0001	0.0001	0.0001	0.0001	0.0001	0.0001	0.0001	0.0001	0.0001
11	78261752	78290624	+	ENSMUSG00000010277	protein_coding	ENSMUSG00000010277	2610507B11Rik	ensembl_havana	7	442.443	444.606	362.883	457.152	462.883	465.22	427.089	450.314	405.87	436.262	492.662	527.504	479.786	474.386	475.001	382.561	470.635	497.581	460.786	484.062
1	43098710	43115948	+	ENSMUSG00000010290	protein_coding	ENSMUSG00000010290	AI597479	ensembl_havana	7	30.0329	35.9451	25.4284	31.4471	30.3752	31.7131	26.1755	25.5498	29.1987	28.9214	39.1007	32.4003	56.9826	42.7923	28.1978	33.2791	31.3695	32.578	24.5591	25.9026
7	47050601	47054778	+	ENSMUSG00000010307	protein_coding	ENSMUSG00000010307	Tmem86a	ensembl_havana	7	11.6657	25.139	6.3177	6.00571	7.99888	9.22161	8.74575	10.4435	11.3569	14.3368	8.97499	11.8813	17.8177	15.6486	5.54128	7.01008	3.11524	9.50612	8.73585	8.61353
1	133897199	133908000	-	ENSMUSG00000010311	protein_coding	ENSMUSG00000010311	Optc	ensembl_havana	15	0.0001	0.129515	0.31598	0.594061	0.540102	0.289276	0.400429	0.159786	0.822596	0.247896	0.598426	0.231766	0.237668	0.0001	2.26248	0.332152	0.405068	0.462198	0.890158	0.248863
11	87405065	87555824	+	ENSMUSG00000010342	protein_coding	ENSMUSG00000010342	Tex14	ensembl_havana	16	0.212847	0.291284	0.063276	0.396074	0.168851	0.353538	0.277251	0.926277	0.28481	0.637288	0.119765	0.198671	1.154	0.148427	0.196828	0.295257	0.124706	1.22136	0.296786	1.02625
11	101448407	101458699	+	ENSMUSG00000010358	protein_coding	ENSMUSG00000010358	Ifi35	ensembl_havana	13	33.0114	29.5391	15.036	15.0141	14.7152	15.5835	25.5904	22.5477	25.4658	31.5409	37.3955	36.5041	32.2076	28.2563	19.968	19.1853	15.1708	17.1637	29.9654	31.7485
11	101627195	101636101	+	ENSMUSG00000010362	protein_coding	ENSMUSG00000010362	Rdm1	ensembl_havana	9	5.28332	7.7003	4.04336	5.64273	3.20636	5.43019	6.31298	8.30376	5.28305	9.45173	4.93629	4.93128	10.1137	8.8997	4.81995	6.97319	2.95948	3.79591	6.3294	10.8524
14	55662263	55672125	-	ENSMUSG00000010376	protein_coding	ENSMUSG00000010376	Nedd8	ensembl_havana	15	167.255	161.866	130.996	149.843	114.008	138.901	138.945	157.961	97.7822	109.986	132.529	156.408	127.201	164.643	155.94	167.354	112.083	116.812	156.98	165.521
11	76726602	76763580	-	ENSMUSG00000010392	protein_coding	ENSMUSG00000010392	Gosr1	ensembl_havana	8	71.9795	72.5049	73.3158	76.2251	69.1204	61.6589	72.2133	72.21	74.436	69.2766	79.727	71.0223	71.7458	69.0091	70.101	73.1991	80.1526	69.8759	79.6768	83.1492
14	54426909	54429757	+	ENSMUSG00000010406	protein_coding	ENSMUSG00000010406	Mrpl52	ensembl_havana	12	43.8969	52.575	61.0913	59.4622	46.1366	49.0958	46.5922	50.7482	33.6908	41.205	56.3624	61.7888	45.6132	57.9588	56.3628	55.4159	41.1511	39.6415	62.0075	55.2877
8	12573029	12600745	+	ENSMUSG00000010435	protein_coding	ENSMUSG00000010435	Spaca7	ensembl_havana	7	0.0001	0.0001	0.0001	0.0001	0.0001	0.0001	0.0001	0.0001	0.0001	0.0001	0.0001	0.0001	0.0001	0.0001	0.0001	0.0001	0.0001	0.0001	0.0001	0.0001
1	36335730	36369182	-	ENSMUSG00000010453	protein_coding	ENSMUSG00000010453	Kansl3	ensembl_havana	12	129.421	110.876	99.0285	92.7901	103.377	84.4074	91.737	86.7095	108.949	119.013	135.641	116.727	128.049	106.981	91.8067	99.505	121.272	104.764	117.125	111.446
10	23102963	23350787	-	ENSMUSG00000010461	protein_coding	ENSMUSG00000010461	Eya4	ensembl_havana	15	13.7223	13.8799	63.871	32.899	38.644	26.765	45.576	49.1194	42.675	41.3819	36.857	29.1569	2.88486	16.8352	15.3449	15.0162	32.5845	20.3654	60.0955	36.6305
7	137193673	137314446	-	ENSMUSG00000010476	protein_coding	ENSMUSG00000010476	Ebf3	ensembl_havana	14	3.19131	1.03542	0.347568	0.132091	0.135101	0.0001	0.615991	0.574969	0.85423	0.424892	0.209514	0.0662903	1.3237	2.225	0.16404	0.110784	0.21816	0.132128	0.197891	0.0933862
2	181578480	181585171	+	ENSMUSG00000010492	lncRNA	ENSMUSG00000010492	Uckl1os	havana	10	0.0355578	0.0001	0.0001	0.561064	0.0338501	0.160753	0.184867	0.0639743	0.0317345	0.0708987	0.0599326	0.0001	0.0340383	0.0001	0.131252	0.184573	0.0624028	0.099121	0.0330651	0.124482
2	181763332	181827798	+	ENSMUSG00000010505	protein_coding	ENSMUSG00000010505	Myt1	ensembl_havana	16	0.0001	0.0001	0.031688	0.0001	0.0001	0.0001	0.0001	0.0320371	0.0317345	0.0001	0.0300163	0.0001	0.0001	0.0001	0.0001	0.0001	0.0001	0.0001	0.0001	0.0001
4	109676588	109963961	+	ENSMUSG00000010517	protein_coding	ENSMUSG00000010517	Faf1	ensembl_havana	7	95.6299	77.455	91.4157	90.3812	73.1704	85.3071	97.5572	89.8393	90.3797	96.9943	80.2057	84.2273	60.7158	66.9325	106.692	105.703	69.8104	73.7708	91.5772	112.628
12	111484609	111485824	-	ENSMUSG00000010529	protein_coding	ENSMUSG00000010529	Gm266	ensembl_havana	6	0.0355578	0.0971613	0.0001	0.0330979	0.0338501	0.0322307	0.0001	0.0001	0.0317345	0.106298	0.0001	0.0331952	0.0679767	0.0742633	0.0001	0.110784	0.124706	0.033107	0.0330651	0.0311954
3	88282757	88297000	-	ENSMUSG00000010538	protein_coding	ENSMUSG00000010538	Tsacc	ensembl_havana	14	1.84391	1.06777	0.884564	1.08903	1.35011	0.996151	0.369634	0.319471	0.727693	0.849685	1.40617	1.05915	3.22424	2.41041	0.688649	0.701098	1.61997	1.25437	0.989053	0.590913
11	74770830	74828526	+	ENSMUSG00000010554	protein_coding	ENSMUSG00000010554	Mettl16	ensembl_havana	14	184.735	161.801	125.499	88.7313	129.196	89.6126	125.611	92.8095	122.489	112.712	171.69	134.267	146.037	149.588	101.643	88.7686	163.327	120.443	118.839	99.381
17	50279395	50293637	-	ENSMUSG00000010592	protein_coding	ENSMUSG00000010592	Dazl	ensembl_havana	9	0.354678	0.0324538	0.0001	0.0001	0.0001	0.0001	0.0001	0.0320371	0.0633689	0.177097	0.0001	0.0331952	0.0679767	0.0371817	0.0001	0.0001	0.0001	0.0001	0.0001	0.0001
15	77388219	77399111	-	ENSMUSG00000010601	protein_coding	ENSMUSG00000010601	Apol7a	ensembl_havana	14	2.34032	0.906006	0.695036	0.46207	1.11385	0.385668	1.47824	0.383346	2.56249	1.09748	2.33357	1.15843	5.73568	1.29796	1.77066	0.664204	1.0904	0.891289	0.659402	0.217768
9	22156846	22158359	+	ENSMUSG00000010607	protein_coding	ENSMUSG00000010607	Pigyl	ensembl_havana	8	16.098	15.5623	13.9304	15.6741	26.0215	22.5558	22.2338	13.8289	24.6117	20.4609	23.5741	12.7086	25.6575	16.9835	17.5089	11.0316	29.5316	35.5817	17.0431	11.9718
12	83631236	83683124	+	ENSMUSG00000010608	protein_coding	ENSMUSG00000010608	Rbm25	ensembl_havana	15	189.771	201.014	250.588	270.616	196.358	241.077	149.662	184.852	189.206	205.529	242.322	246.327	214.864	240.03	237.779	282.65	216.751	235.208	158.595	160.421
1	180227004	180263439	-	ENSMUSG00000010609	protein_coding	ENSMUSG00000010609	Psen2	ensembl_havana	15	14.1832	14.624	12.1299	11.7803	11.3739	11.9206	18.6616	13.5095	24.3903	31.4347	18.7875	14.231	45.8508	27.8114	11.8366	12.5812	15.2954	16.0415	20.1418	17.8178
9	119148023	119157094	-	ENSMUSG00000010651	protein_coding	ENSMUSG00000010651	Acaa1b	ensembl_havana	4	0.0001	0.226576	1.8322	2.27695	1.65386	1.73516	2.21731	2.2357	0.980768	1.55767	0.149681	0.198671	0.0001	0.407998	1.86902	1.80794	1.86918	2.54164	0.494577	0.311054
9	119071527	119093503	-	ENSMUSG00000010660	protein_coding	ENSMUSG00000010660	Plcd1	ensembl_havana	3	2.65944	6.37379	9.82397	8.18357	22.8827	28.5643	18.6308	19.5456	22.1442	25.0982	21.3603	19.4931	0.950374	3.11496	15.8695	13.6511	17.6006	22.7089	34.152	21.9224
19	10182888	10196878	+	ENSMUSG00000010663	protein_coding	ENSMUSG00000010663	Fads1	ensembl_havana	5	264.587	253.718	257.158	292.658	535.311	359.864	468.077	283.889	517.951	344.613	301.078	199.994	391.92	273.811	243.583	219.966	487.706	647.069	262.007	156.97
5	29229802	29378391	-	ENSMUSG00000010721	protein_coding	ENSMUSG00000010721	Lmbr1	ensembl_havana	15	8.65182	10.4504	9.28697	8.87652	10.7664	11.7278	12.1947	9.90062	15.5959	15.7528	11.5179	10.7891	17.1729	12.1629	15.9679	11.8064	9.15861	11.4535	11.9335	10.728
7	143634806	143649662	-	ENSMUSG00000010751	protein_coding	ENSMUSG00000010751	Tnfrsf22	ensembl_havana	15	122.755	152.548	15.8573	10.7244	3.44262	4.98036	5.14279	10.9545	6.29536	4.88521	14.33	17.6729	32.8864	68.5641	10.1644	11.9909	2.80372	3.36681	4.12074	12.687
7	143557230	143600091	-	ENSMUSG00000010755	protein_coding	ENSMUSG00000010755	Cars	ensembl_havana	17	204.379	177.493	123.478	94.407	98.9218	74.5112	127.705	100.634	117.87	99.2599	107.639	101.999	121.024	116.622	131.906	135.662	93.4854	93.971	117.817	119.842
7	143501545	143503151	-	ENSMUSG00000010760	protein_coding	ENSMUSG00000010760	Phlda2	ensembl_havana	5	3.33314	3.75314	1.61109	0.627059	0.0676003	0.128623	0.246456	0.383346	0.696058	0.778886	0.299263	0.165576	0.40736	0.964223	1.90181	0.922466	0.155857	0.066114	0.560507	0.622008
6	18050964	18109062	-	ENSMUSG00000010796	protein_coding	ENSMUSG00000010796	Asz1	ensembl_havana	11	0.0001	0.0001	0.0001	0.0330979	0.0001	0.0001	0.0001	0.0001	0.0001	0.0001	0.0001	0.0001	0.0340383	0.0001	0.0001	0.110784	0.0001	0.0001	0.0001	0.0933862
6	17988940	18030586	-	ENSMUSG00000010797	protein_coding	ENSMUSG00000010797	Wnt2	ensembl_havana	6	1.31204	9.31799	2.77984	5.64273	0.506352	3.79152	1.75539	4.15193	1.67673	13.8058	1.40617	11.4179	1.79883	6.30398	0.491921	14.057	0.810036	8.0208	2.90103	16.0142
11	42130939	42182931	-	ENSMUSG00000010803	protein_coding	ENSMUSG00000010803	Gabra1	ensembl_havana	13	0.0001	0.0324538	1.70585	2.67293	1.14761	0.128623	0.462018	0.191723	3.06864	2.83205	0.149681	0.0993855	1.22188	0.22259	0.0656761	0.0369947	0.124706	0.033107	0.824228	0.0933862
5	143357338	143392153	+	ENSMUSG00000010825	protein_coding	ENSMUSG00000010825	Grid2ip	ensembl_havana	17	0.0001	0.0001	0.063276	0.0001	0.0001	0.0001	0.0001	0.0001	0.0001	0.0001	0.0001	0.0001	0.0001	0.0001	0.0001	0.0001	0.0001	0.0001	0.0001	0.0311954
15	79516411	79527740	+	ENSMUSG00000010830	protein_coding	ENSMUSG00000010830	Kdelr3	ensembl_havana	8	9.07731	14.3005	19.5215	11.1204	17.1452	10.7317	51.0266	31.6179	37.5502	22.4433	14.6292	12.841	2.30791	2.6329	7.08232	6.30909	16.0742	17.8899	23.4713	14.3973
11	101984279	101992265	+	ENSMUSG00000010841	protein_coding	ENSMUSG00000010841	Cfap97d1	ensembl_havana	13	0.0001	0.0001	0.0001	0.0001	0.0001	0.0001	0.0308945	0.0001	0.0633689	0.0001	0.0001	0.0001	0.0679767	0.0001	0.0001	0.0001	0.0001	0.0001	0.0001	0.0001
2	103073675	103092645	+	ENSMUSG00000010911	protein_coding	ENSMUSG00000010911	Apip	ensembl_havana	12	11.0984	12.521	17.3419	13.8262	15.7952	15.2943	12.5643	16.1284	18.8859	27.0806	15.1078	17.1434	12.5573	11.9775	15.8367	17.4513	15.3577	16.3056	13.8125	16.3874
2	103021075	103073514	-	ENSMUSG00000010914	protein_coding	ENSMUSG00000010914	Pdhx	ensembl_havana	10	56.2362	58.0104	56.3847	51.0148	47.4191	47.8748	52.1968	55.5388	55.2655	64.4977	51.6655	56.295	30.4428	40.345	56.1005	52.6119	60.4961	55.1878	56.832	68.5965
8	110618585	110720399	+	ENSMUSG00000010936	protein_coding	ENSMUSG00000010936	Vac14	ensembl_havana	11	105.381	107.9	79.3491	93.417	101.858	90.1909	91.7062	83.5477	102.464	93.4544	88.0438	92.3356	68.9289	90.9985	151.907	105.962	123.173	104.83	97.2142	99.2877
3	146149833	146195514	+	ENSMUSG00000011008	protein_coding	ENSMUSG00000011008	Mcoln2	ensembl_havana	13	0.567426	0.226576	0.916152	0.46207	0.371352	0.160753	0.492812	0.22366	0.822596	0.212496	0.329179	0.165576	1.3237	0.66757	2.26248	0.184573	0.21816	0.231149	1.05498	0.0933862
5	33104219	33162871	+	ENSMUSG00000011034	protein_coding	ENSMUSG00000011034	Slc5a1	ensembl_havana	6	0.0001	0.0971613	0.0001	0.660057	0.0338501	1.2532	0.0308945	0.159786	0.126638	0.0001	0.0001	0.0331952	0.0001	0.0001	0.0656761	2.02931	0.0001	0.264156	0.0330651	0.74639
7	44848991	44855422	+	ENSMUSG00000011096	protein_coding	ENSMUSG00000011096	Akt1s1	ensembl_havana	17	154.384	144.266	144.01	156.773	118.564	127.977	131.123	139.31	132.074	123.756	118.558	129.733	98.8285	118.736	136.53	144.258	86.196	107.834	146.134	150.719
9	37648763	37657313	-	ENSMUSG00000011114	protein_coding	ENSMUSG00000011114	Tbrg1	ensembl_havana	18	170.091	155.298	181.915	198.746	194.232	179.032	236.995	177.89	231.723	188.643	212.914	186.227	125.233	145.212	177.056	153.076	231.953	220.916	215.856	223.731
9	37659902	37669236	-	ENSMUSG00000011118	protein_coding	ENSMUSG00000011118	Panx3	ensembl_havana	4	0.0001	0.0001	1.70585	1.05603	0.10135	0.0001	0.0308945	0.0001	0.442982	0.0001	0.119765	0.0001	0.0001	0.0001	0.623073	0.0001	0.436219	0.0001	0.725332	0.0622908
12	112620045	112641361	+	ENSMUSG00000011148	protein_coding	ENSMUSG00000011148	Adssl1	ensembl_havana	14	0.602883	0.711883	0.63186	0.363076	0.0676003	0.096492	0.154073	0.127849	0.253176	0.601889	0.329179	0.397242	1.96852	1.59461	0.295193	0.332152	0.0624028	0.198142	0.296786	0.528722
7	83774101	83794881	-	ENSMUSG00000011154	protein_coding	ENSMUSG00000011154	Cfap161	ensembl_havana	17	0.106474	0.0001	0.221216	0.0330979	2.05886	0.578452	3.01796	0.543032	2.53086	0.814285	1.55575	0.430337	0.0340383	0.0371817	1.83623	0.184573	1.71343	1.4194	2.01097	0.124482
12	112960085	113000705	-	ENSMUSG00000011158	protein_coding	ENSMUSG00000011158	Brf1	ensembl_havana	8	29.8911	28.6008	33.2307	42.8643	31.8602	47.2001	32.088	37.654	41.378	40.9926	42.7206	41.7993	46.292	41.9766	36.5916	43.3144	34.8897	47.6292	29.8995	32.557
12	116077726	116146262	+	ENSMUSG00000011171	protein_coding	ENSMUSG00000011171	Vipr2	ensembl_havana	11	0.0001	0.0324538	0.0001	0.330079	0.0001	0.546322	0.0616891	3.03413	0.0001	0.637288	0.0001	2.11819	0.0340383	0.111345	0.0001	0.0369947	0.0001	0.0001	0.0001	0.0311954
12	17544794	17551506	+	ENSMUSG00000011179	protein_coding	ENSMUSG00000011179	Odc1	ensembl_havana	8	318.66	255.692	284.766	235.869	190.216	230.409	121.916	209.667	186.802	225.848	282.29	319.236	184.285	212.478	334.438	282.097	211.393	171.504	167.298	165.023
11	45946843	45955495	-	ENSMUSG00000011254	protein_coding	ENSMUSG00000011254	Thg1l	ensembl_havana	16	32.7986	29.2479	37.8425	37.7166	26.0215	29.7852	26.9761	26.2205	31.5397	31.2931	45.6524	43.1231	28.3386	30.8891	44.7886	45.4912	30.7777	28.2871	34.6794	37.439
11	46055992	46147344	+	ENSMUSG00000011256	protein_coding	ENSMUSG00000011256	Adam19	ensembl_havana	16	4.75145	7.79736	40.1168	6.1047	4.08387	0.289276	21.2175	10.6671	19.2655	13.6997	20.2235	13.7677	4.58178	9.34468	3.96746	9.33445	0.405068	0.231149	33.5256	6.12589
4	123262351	123298926	+	ENSMUSG00000011257	protein_coding	ENSMUSG00000011257	Pabpc4	ensembl_havana	19	164.312	134.236	173.671	157.202	136.823	130.419	134.634	128.292	124.355	136.288	152.813	179.277	145.12	141.912	170.4	173.184	148.81	124.106	152.76	137.722
7	19463331	19496763	+	ENSMUSG00000011263	protein_coding	ENSMUSG00000011263	Exoc3l2	ensembl_havana	16	0.0001	0.0648075	0.0001	0.0001	0.843854	0.321407	0.246456	0.0959114	0.348079	0.601889	0.119765	0.132481	0.0001	0.0371817	0.16404	0.110784	0.685431	2.90472	0.0660302	0.0311954
7	19577287	19580657	+	ENSMUSG00000011267	protein_coding	ENSMUSG00000011267	Zfp296	ensembl_havana	8	11.9139	10.9357	3.09572	4.45481	2.63261	2.4099	2.18651	3.3535	2.43595	2.51345	4.9662	6.08961	6.5502	11.8662	6.06589	4.75951	3.4579	1.91451	4.41743	5.44179
17	56111601	56117597	-	ENSMUSG00000011305	protein_coding	ENSMUSG00000011305	Plin5	ensembl_havana	11	0.0001	0.0001	0.0001	0.0001	0.168851	0.160753	0.0924836	0.0001	0.0317345	0.212496	0.0898489	0.0001	0.0340383	0.0001	0.0001	0.0369947	0.0624028	0.066114	0.0660302	0.0001
8	70042813	70072348	+	ENSMUSG00000011306	protein_coding	ENSMUSG00000011306	Sugp1	ensembl_havana	7	59.8175	71.599	56.3847	61.0131	60.3791	59.1206	59.8031	63.4911	38.689	40.143	61.508	54.9712	73.0015	79.7257	72.888	70.9854	71.1187	69.2488	54.5903	62.3775
7	24870057	24877652	+	ENSMUSG00000011349	protein_coding	ENSMUSG00000011349	Dmrtc2	ensembl_havana	5	0.0710157	0.0001	0.0001	0.0001	0.0676003	0.0001	0.0308945	0.0001	0.0001	0.0001	0.0001	0.0001	0.0001	0.0001	0.0001	0.0001	0.0312514	0.066114	0.0001	0.0001
7	24818795	24840276	+	ENSMUSG00000011350	lncRNA	ENSMUSG00000011350	Gm5893	ensembl_havana	15	0.0001	0.0001	0.0001	0.0001	0.0001	0.0001	0.0001	0.0001	0.0001	0.0001	0.0001	0.0001	0.0001	0.0001	0.0001	0.0001	0.0001	0.0001	0.0001	0.0001
7	45470987	45488806	-	ENSMUSG00000011382	protein_coding	ENSMUSG00000011382	Dhdh	ensembl_havana	8	0.212847	0.453053	0.063276	0.363076	0.978854	1.06041	0.33884	0.319471	0.537886	0.601889	0.23943	0.331052	3.6315	1.00131	0.0001	0.184573	0.810036	2.8387	0.13196	0.186672
7	29816114	29831006	+	ENSMUSG00000011427	protein_coding	ENSMUSG00000011427	Zfp790	ensembl_havana	16	13.084	13.2004	11.8456	11.7803	6.78388	9.06095	8.74575	10.6032	8.98429	8.77914	14.9283	14.8598	11.3016	12.0516	10.7874	13.6511	8.37982	9.34108	13.4499	11.5676
3	20248264	20275734	-	ENSMUSG00000011463	protein_coding	ENSMUSG00000011463	Cpb1	ensembl_havana	5	0.0001	0.0001	0.0001	0.0001	0.0001	0.0001	0.0001	0.0639743	0.0001	0.0001	0.0001	0.0001	0.0001	0.0001	0.0001	0.0369947	0.0001	0.0001	0.0001	0.0001
17	57032773	57041655	-	ENSMUSG00000011486	protein_coding	ENSMUSG00000011486	Slc25a41	ensembl_havana	14	0.0355578	0.0001	0.0001	0.0001	0.0338501	0.0322307	0.0308945	0.0639743	0.126638	0.0354994	0.0001	0.0001	0.101915	0.0742633	0.0001	0.0369947	0.0001	0.231149	0.0330651	0.0001
17	55986509	55996882	+	ENSMUSG00000011589	protein_coding	ENSMUSG00000011589	Fsd1	ensembl_havana	9	4.9642	7.47382	6.72834	7.12764	9.99014	5.39805	12.6874	14.5954	8.66794	9.41633	4.60721	4.20319	2.24003	5.33986	3.14775	6.86251	7.28952	9.96822	7.18649	8.116
7	24541658	24546119	-	ENSMUSG00000011632	protein_coding	ENSMUSG00000011632	Pinlyp	ensembl_havana	7	0.0001	0.0001	0.031688	0.0330979	0.0338501	0.0001	0.0924836	0.0320371	0.0950034	0.0001	0.0599326	0.0001	0.0001	0.0371817	0.0001	0.0001	0.0001	0.0001	0.0001	0.0622908
7	44896079	44902632	+	ENSMUSG00000011658	protein_coding	ENSMUSG00000011658	Fuz	ensembl_havana	16	5.46061	10.2239	6.88628	13.1332	6.95263	16.1297	5.72788	8.71894	7.02295	7.25697	8.34675	6.8177	37.0268	22.3974	5.96753	11.253	4.98432	7.09661	4.48336	8.52024
7	27356383	27447687	-	ENSMUSG00000011751	protein_coding	ENSMUSG00000011751	Sptbn4	ensembl_havana	16	0.744715	1.03542	0.852976	0.429072	0.607603	0.771236	0.985525	0.862403	0.917499	1.73467	1.19675	1.357	2.20609	1.74294	1.44277	1.32831	0.498522	0.99031	1.08795	1.24392
19	41911923	41918661	+	ENSMUSG00000011752	protein_coding	ENSMUSG00000011752	Pgam1	ensembl_havana	7	104.991	89.9759	104.43	85.7945	117.282	91.8939	85.3317	81.1524	86.9632	91.8968	112.336	106.037	139.215	116.548	108.135	103.158	113.578	111.399	84.6545	72.9499
5	107744795	107875108	-	ENSMUSG00000011831	protein_coding	ENSMUSG00000011831	Evi5	ensembl_havana	16	79.2129	65.7106	93.2163	95.0339	81.9455	73.8364	78.7109	68.665	74.4043	61.0286	67.2519	62.1859	47.0726	50.6537	72.0355	72.9777	83.1432	83.5738	95.6319	92.6022
8	4166567	4211258	+	ENSMUSG00000011832	protein_coding	ENSMUSG00000011832	Evi5l	ensembl_havana	15	8.26178	11.9386	9.69761	11.9783	16.1664	17.672	22.0798	23.9849	19.6767	22.0185	14.33	11.5172	23.6551	19.468	12.7219	12.9132	12.118	17.3288	16.0211	15.0503
8	4253080	4256221	+	ENSMUSG00000011837	protein_coding	ENSMUSG00000011837	Snapc2	ensembl_havana	4	15.4597	17.6329	16.7101	18.5779	25.6502	24.9335	19.3083	19.6095	35.8736	40.8864	20.4628	20.5522	20.2274	16.0194	20.2303	18.7057	23.7063	27.594	17.4386	18.7195
11	77493562	77507787	+	ENSMUSG00000011877	protein_coding	ENSMUSG00000011877	Git1	ensembl_havana	13	193.033	212.403	151.559	174.097	187.988	175.626	178.146	164.093	190.946	188.148	184.853	189.602	171.626	176.954	178.728	185.322	170.772	193.388	166.078	174.539
5	114669398	114690985	-	ENSMUSG00000011884	protein_coding	ENSMUSG00000011884	Gltp	ensembl_havana	13	57.5482	68.1048	62.3232	89.3253	72.5967	87.3956	63.4984	72.3697	60.1688	68.7103	54.1785	58.9095	50.6022	44.8689	66.5271	49.9186	84.7007	83.1117	82.2151	96.0849
9	69989466	70008318	+	ENSMUSG00000011958	protein_coding	ENSMUSG00000011958	Bnip2	ensembl_havana	17	143.25	136.63	206.838	183.468	157.512	164.059	173.989	173.163	141.185	136.571	179.109	180.336	106.94	118.031	189.122	190.561	164.511	157.708	195.154	191.517
15	98538689	98570924	-	ENSMUSG00000011960	protein_coding	ENSMUSG00000011960	Ccnt1	ensembl_havana	12	84.4607	86.4817	82.2552	76.5881	62.4379	66.2857	68.2408	70.1021	73.5186	79.7549	78.9492	83.0689	65.7047	66.8584	85.7409	87.6618	89.9653	80.8673	89.4674	83.6156
16	17797282	17808294	+	ENSMUSG00000012017	protein_coding	ENSMUSG00000012017	Scarf2	ensembl_havana	4	99.3885	178.011	105.441	151.757	139.928	148.09	87.4874	128.324	81.2058	104.428	89.2404	96.8365	60.6819	110.318	71.3469	145.254	78.9377	98.1629	87.7532	124.071
3	138164078	138193826	-	ENSMUSG00000012042	protein_coding	ENSMUSG00000012042	4930579F01Rik	ensembl_havana	8	0.0001	0.0001	0.0001	0.0001	0.0001	0.0001	0.0001	0.0001	0.0317345	0.0708987	0.0300163	0.0001	0.0001	0.0001	0.0001	0.0001	0.0001	0.0001	0.0001	0.0001
12	55836324	55869737	+	ENSMUSG00000012076	protein_coding	ENSMUSG00000012076	Brms1l	ensembl_havana	8	49.4283	48.466	34.6521	41.6434	36.9565	37.336	33.1966	34.7797	33.6275	38.904	49.5714	40.0121	40.1831	36.1918	37.0506	41.8017	33.7059	36.7699	24.8558	28.5457
16	17651208	17732892	-	ENSMUSG00000012114	protein_coding	ENSMUSG00000012114	Med15	ensembl_havana	17	176.261	135.498	114.822	100.512	128.723	118.594	124.964	109.64	125.051	113.278	112.874	115.568	96.3171	112.209	135.972	125.848	101.616	128.991	133.904	130.912
4	133969028	134000919	-	ENSMUSG00000012117	protein_coding	ENSMUSG00000012117	Dhdds	ensembl_havana	13	46.6981	46.4601	34.9048	39.8615	32.8052	39.1031	42.0346	48.2571	42.9281	43.7183	38.0536	38.225	50.2628	46.723	40.0999	38.223	28.784	35.7797	37.9759	44.5287
4	134060815	134092505	+	ENSMUSG00000012123	protein_coding	ENSMUSG00000012123	Crybg2	ensembl_havana	17	0.744715	0.711883	0.47392	0.363076	0.607603	0.48206	0.739169	0.127849	0.85423	0.177097	0.987338	0.231766	2.07034	0.852978	2.45921	0.664204	0.685431	1.68346	0.857193	0.684199
4	134102570	134127594	+	ENSMUSG00000012126	protein_coding	ENSMUSG00000012126	Ubxn11	ensembl_havana	16	1.52479	0.970713	0.695036	0.495068	0.675103	0.514191	1.01632	0.543032	2.30942	1.38067	1.40617	0.893669	3.80119	1.70586	0.885378	0.516625	0.623128	0.726254	1.35167	1.02625
1	78510991	78538174	+	ENSMUSG00000012187	protein_coding	ENSMUSG00000012187	Mogat1	ensembl_havana	13	0.0001	0.0001	0.0001	0.0001	0.0001	0.0001	0.0308945	0.0320371	0.0001	0.0001	0.0001	0.0001	0.0001	0.0371817	0.0328881	0.110784	0.0001	0.0001	0.0001	0.0311954
12	113074502	113088918	+	ENSMUSG00000012211	protein_coding	ENSMUSG00000012211	Tex22	ensembl_havana	13	0.0001	0.0001	0.0001	0.0001	0.0338501	0.0322307	0.0001	0.0001	0.0001	0.0001	0.0300163	0.0331952	0.0340383	0.0001	0.0001	0.0738893	0.0001	0.0001	0.0330651	0.0001
18	34542313	34548274	+	ENSMUSG00000012282	protein_coding	ENSMUSG00000012282	Wnt8a	ensembl_havana	2	0.0001	0.0324538	0.031688	0.0001	0.0001	0.0001	0.0001	0.0001	0.0001	0.0001	0.0898489	0.0001	0.0001	0.0001	0.0328881	0.0369947	0.0001	0.0001	0.0001	0.0001
17	46257851	46283027	-	ENSMUSG00000012296	protein_coding	ENSMUSG00000012296	Tjap1	ensembl_havana	16	92.7578	91.3024	100.071	85.3656	98.3818	94.3037	85.7937	89.6157	108	95.4368	99.0829	95.1818	98.7607	102.716	95.7085	96.8117	101.616	87.5347	89.863	94.9033
2	103263433	103303279	-	ENSMUSG00000012350	protein_coding	ENSMUSG00000012350	Ehf	ensembl_havana	15	0.0001	0.0001	0.0001	0.0001	0.0001	0.0001	0.0001	0.0320371	0.0633689	0.0708987	0.0001	0.0001	0.0001	0.0001	0.0001	0.0001	0.0312514	0.0001	0.0001	0.0933862
6	122707489	122714634	+	ENSMUSG00000012396	protein_coding	ENSMUSG00000012396	Nanog	ensembl_havana	12	0.531968	0.647175	1.45315	1.15502	3.17261	1.63876	1.60142	0.734654	2.46759	2.51345	1.70533	0.628908	2.44366	1.11255	1.24605	1.29141	2.74142	3.03674	0.791263	0.528722
14	18267823	18271392	-	ENSMUSG00000012405	protein_coding	ENSMUSG00000012405	Rpl15	ensembl_havana	16	226.292	240.13	208.133	234.021	163.013	206.022	174.39	206.027	168.169	165.457	200.559	217.303	226.64	275.072	205.352	220.298	182.641	185.334	196.472	204.141
13	90089123	90143908	+	ENSMUSG00000012422	protein_coding	ENSMUSG00000012422	Tmem167	ensembl_havana	14	79.3193	72.7314	87.9411	83.7157	76.2754	69.2739	79.3884	76.8089	66.3376	62.5862	67.94	68.3416	49.9573	61.1107	83.9376	82.5334	66.5706	67.8295	75.3583	82.8071
5	7960457	7982214	+	ENSMUSG00000012428	protein_coding	ENSMUSG00000012428	Steap4	ensembl_havana	9	0.177389	1.39131	0.505508	1.05603	1.92386	6.8118	1.57062	3.44931	6.73824	14.5492	0.209514	0.331052	4.81934	1.63169	0.0984642	2.28757	0.90349	2.50863	1.18684	0.653103
13	17695192	17699749	+	ENSMUSG00000012429	protein_coding	ENSMUSG00000012429	Mplkip	ensembl_havana	9	16.1689	15.9182	16.3311	18.8089	15.3902	15.1015	12.0408	12.4875	14.0142	13.0979	17.8302	17.4082	20.1934	15.8711	19.6402	17.5988	12.0557	12.8068	15.5926	13.5577
19	37376403	37421860	+	ENSMUSG00000012443	protein_coding	ENSMUSG00000012443	Kif11	ensembl_havana	4	187.998	213.503	185.769	237.42	219.106	250.876	154.311	192.9	178.64	214.52	193.05	221.738	219.344	220.859	188.335	214.026	223.48	214.612	147.552	179.918
6	8255936	8259174	-	ENSMUSG00000012483	protein_coding	ENSMUSG00000012483	Rpa3	ensembl_havana	4	27.87	29.3773	22.7435	26.0684	25.7177	28.7249	21.5255	23.1545	23.5361	26.8682	27.8821	23.9279	39.2668	35.376	28.0667	27.7818	26.8214	23.3691	19.5484	21.1139
8	111311797	111338178	-	ENSMUSG00000012519	protein_coding	ENSMUSG00000012519	Mlkl	ensembl_havana	14	6.59526	4.20609	17.0892	11.8133	26.9665	22.3952	40.2793	23.6017	10.4395	11.1509	15.3172	11.4179	14.356	9.15927	60.0023	30.4013	37.6933	40.4997	42.7888	37.9365
5	67094399	67099302	-	ENSMUSG00000012520	protein_coding	ENSMUSG00000012520	Phox2b	ensembl_havana	10	0.0001	0.0001	0.0001	0.0001	0.0001	0.0001	0.0001	0.0001	0.0001	0.0001	0.0001	0.0001	0.0001	0.0001	0.0001	0.0001	0.0001	0.0001	0.0001	0.0001
6	29540827	29609888	-	ENSMUSG00000012535	protein_coding	ENSMUSG00000012535	Tnpo3	ensembl_havana	14	298.52	263.166	226.707	225.144	242.866	246.732	229.573	212.51	241.529	236.68	305.236	313.213	317.697	289.571	222.205	216.24	253.51	230.422	218.13	212.288
12	85824659	86061894	+	ENSMUSG00000012609	protein_coding	ENSMUSG00000012609	Ttll5	ensembl_havana	19	25.8134	17.6976	30.4825	28.7742	33.784	26.0902	21.8334	19.1943	30.1161	23.5761	31.9208	21.0486	45.6811	35.0052	29.2471	24.3137	25.6065	27.792	18.3946	12.2828
7	43296197	43313295	-	ENSMUSG00000012640	protein_coding	ENSMUSG00000012640	Zfp715	ensembl_havana	16	16.5944	17.5682	17.8789	18.3469	12.2514	11.9848	16.4444	16.4797	17.5889	16.7086	16.9926	15.7534	16.4602	14.499	16.4925	19.0746	10.9031	12.9058	22.9109	20.4298
8	3655770	3660111	+	ENSMUSG00000012705	protein_coding	ENSMUSG00000012705	Retn	ensembl_havana	16	0.0001	0.0001	0.0001	0.0001	0.0001	0.0322307	0.0001	0.0320371	0.0950034	0.0001	0.0001	0.0001	0.0001	0.0001	0.0001	0.0738893	0.0312514	0.033107	0.0001	0.0311954
7	44252148	44257379	-	ENSMUSG00000012777	protein_coding	ENSMUSG00000012777	Acp4	ensembl_havana	14	0.0001	0.0001	0.0001	0.0001	0.0001	0.0001	0.0001	0.0001	0.0001	0.0001	0.0001	0.0001	0.0001	0.0001	0.0001	0.0001	0.0001	0.0001	0.0001	0.0001
10	60302748	60696491	-	ENSMUSG00000012819	protein_coding	ENSMUSG00000012819	Cdh23	ensembl_havana	15	0.106474	0.0324538	0.600272	0.594061	0.776353	0.160753	0.462018	0.127849	1.36038	0.177097	0.748007	0.0993855	0.135853	0.0001	0.590285	0.0001	0.467371	0.099121	1.08795	0.0311954
7	12922290	12926687	+	ENSMUSG00000012848	protein_coding	ENSMUSG00000012848	Rps5	ensembl_havana	15	973.354	1089.16	825.394	942.023	658.094	854.741	661.436	859.173	684.854	756.166	800.052	910.514	1204.51	1252.54	855.474	928.602	632.654	758.27	800.657	917.594
8	84125989	84132528	+	ENSMUSG00000012889	protein_coding	ENSMUSG00000012889	Podnl1	ensembl_havana	8	4.85783	1.13248	4.13813	0.0660957	0.641353	0.0322307	0.184867	0.191723	1.23384	0.0708987	1.94466	0.0001	2.78304	0.556325	0.360769	0.0001	0.405068	0.264156	0.593472	0.0311954
8	83900105	83941955	+	ENSMUSG00000013033	protein_coding	ENSMUSG00000013033	Adgrl1	ensembl_havana	16	230.441	245.339	97.5754	137.007	132.267	115.446	139.315	161.123	123.659	107.933	122.717	118.613	281.858	285.084	119.381	104.781	122.955	128.43	105.093	101.122
9	14541966	14645057	-	ENSMUSG00000013076	protein_coding	ENSMUSG00000013076	Amotl1	ensembl_havana	17	95.169	99.1968	166.342	112.094	141.717	92.6007	144.457	117.018	198.664	110.481	108.865	77.2111	66.7568	74.4601	181.351	118.026	125.011	73.6717	173.199	101.744
7	30698926	30700537	+	ENSMUSG00000013083	protein_coding	ENSMUSG00000013083	2200002J24Rik	ensembl_havana	8	0.0001	0.0001	0.0001	0.0001	0.135101	0.0322307	0.0616891	0.159786	0.0001	0.283295	0.23943	0.0993855	0.0001	0.0001	0.16404	0.0738893	0.187008	0.363177	0.0660302	0.186672
16	22381309	22439720	-	ENSMUSG00000013089	protein_coding	ENSMUSG00000013089	Etv5	ensembl_havana	15	26.8417	23.9419	23.9122	21.6137	6.98638	6.00854	26.1139	20.0886	21.2268	21.4521	24.4716	22.935	53.0118	50.9132	19.4106	7.74798	6.6665	6.89856	37.7452	37.3768
7	4782937	4784342	+	ENSMUSG00000013091	protein_coding	ENSMUSG00000013091	Tmem190	ensembl_havana	5	0.0001	0.0001	0.0001	0.0001	0.0001	0.0001	0.0001	0.0001	0.0001	0.0354994	0.0001	0.0001	0.0001	0.0001	0.0328881	0.0001	0.0001	0.066114	0.0001	0.0001
8	105713854	105758665	-	ENSMUSG00000013150	protein_coding	ENSMUSG00000013150	Gfod2	ensembl_havana	15	17.4099	20.9006	17.8157	15.9711	21.9714	14.2983	19.0003	15.298	18.4746	16.4608	18.967	15.6541	12.0482	15.1294	18.5254	17.3406	23.644	20.1014	16.12	17.1337
8	105703651	105708211	-	ENSMUSG00000013155	protein_coding	ENSMUSG00000013155	Enkd1	ensembl_havana	10	37.1954	34.3922	30.1982	20.4588	26.5952	22.5237	26.1755	20.1844	27.1425	26.5142	25.0999	21.1479	24.9448	28.2193	29.3126	30.9547	31.6188	24.2602	29.9324	29.2609
8	105707655	105710247	+	ENSMUSG00000013158	protein_coding	ENSMUSG00000013158	4933405L10Rik	ensembl_havana	6	0.0001	0.0324538	0.0001	0.0990936	0.0676003	0.0322307	0.154073	0.159786	0.0950034	0.0354994	0.23943	0.0993855	0.237668	0.148427	0.0656761	0.184573	0.0312514	0.165135	0.164926	0.124482
8	105524465	105566048	-	ENSMUSG00000013160	protein_coding	ENSMUSG00000013160	Atp6v0d1	ensembl_havana	7	49.9957	53.5456	58.9749	68.6686	88.2905	76.5996	91.0903	82.3341	109.582	95.543	87.4155	86.4116	59.4261	63.3727	112.037	74.8962	95.7906	92.2217	92.1376	71.5506
17	56412426	56476484	-	ENSMUSG00000013236	protein_coding	ENSMUSG00000013236	Ptprs	ensembl_havana	17	406.453	489.124	183.842	259.099	348.639	380.202	300.154	351.053	312.106	296.718	320.015	283.129	540.061	593.604	216.303	278.518	277.185	284.157	232.107	219.44
1	131827493	131848866	+	ENSMUSG00000013275	protein_coding	ENSMUSG00000013275	Slc41a1	ensembl_havana	9	37.8691	51.2808	29.4401	34.9778	28.1815	33.898	25.9291	37.2708	34.7031	33.3109	35.3312	37.7286	46.5635	45.1285	34.4604	39.1822	25.9181	22.5109	37.0529	43.2538
2	156019139	156052948	-	ENSMUSG00000013338	protein_coding	ENSMUSG00000013338	Fer1l4	ensembl_havana	16	0.0001	0.0324538	0.0001	0.0001	0.0001	0.0001	0.0308945	0.0320371	0.0633689	0.0708987	0.0001	0.0001	0.0001	0.0001	0.0001	0.0369947	0.0001	0.0001	0.0001	0.0622908
7	43492044	43505941	-	ENSMUSG00000013353	protein_coding	ENSMUSG00000013353	4931406B18Rik	ensembl_havana	10	0.0001	0.0001	0.0001	0.0001	0.0001	0.0322307	0.0001	0.0001	0.0001	0.0001	0.0001	0.0001	0.0001	0.0742633	0.0001	0.0001	0.0001	0.0001	0.0001	0.0001
7	43472904	43490076	-	ENSMUSG00000013367	protein_coding	ENSMUSG00000013367	Iglon5	ensembl_havana	5	2.76581	2.5884	1.45315	0.627059	0.911354	0.321407	1.35506	0.44722	5.82084	1.69927	0.478761	0.165576	1.22188	1.18671	0.918166	1.18073	0.685431	0.66024	0.923123	0.901867
11	95957163	96005941	-	ENSMUSG00000013415	protein_coding	ENSMUSG00000013415	Igf2bp1	ensembl_havana	9	12.1621	35.1686	76.4746	96.7498	36.1465	59.3455	18.3536	30.8833	47.7365	64.3207	32.4294	45.8369	78.2959	34.1894	60.1662	141.749	49.0635	82.6166	29.9324	182.064
11	95865943	95914892	-	ENSMUSG00000013418	protein_coding	ENSMUSG00000013418	B4galnt2	ensembl_havana	8	0.0001	0.0324538	0.0001	0.0001	0.0001	0.0001	0.0616891	0.0320371	0.348079	0.141697	0.179598	0.0001	0.0001	0.0001	0.0984642	0.221468	0.0001	0.033107	0.0989953	0.0311954
9	121759330	121771743	+	ENSMUSG00000013419	protein_coding	ENSMUSG00000013419	Zfp651	ensembl_havana	7	9.43189	16.5005	41.5067	35.7368	38.6778	35.3439	47.4853	37.3346	36.0001	30.4081	30.9036	25.5496	9.70647	10.7538	28.1323	31.2868	31.8057	24.5243	45.3271	40.2686
2	25199712	25211490	-	ENSMUSG00000013465	protein_coding	ENSMUSG00000013465	Nelfb	ensembl_havana	19	82.2978	93.179	73.2211	85.3985	85.8605	83.09	71.9977	87.3482	77.6311	92.534	76.3764	73.9678	92.9572	82.4327	63.445	73.9739	73.7977	92.0896	65.304	75.3753
11	119307768	119345376	+	ENSMUSG00000013483	protein_coding	ENSMUSG00000013483	Card14	ensembl_havana	14	0.0710157	0.0324538	0.379156	0.0660957	0.0676003	0.128623	0.123278	0.0320371	0.158272	0.0708987	0.149681	0.0001	0.0001	0.0001	0.918166	0.184573	0.0935542	0.0001	1.3187	0.0933862
5	108629770	108648783	+	ENSMUSG00000013495	protein_coding	ENSMUSG00000013495	Tmem175	ensembl_havana	15	15.1406	16.3388	14.2463	21.2177	23.6927	20.0496	11.3633	13.8928	10.1864	9.98272	18.9969	15.1577	41.3709	29.7025	17.4761	17.4513	22.6783	26.0096	13.0543	12.1273
2	170346991	170427846	-	ENSMUSG00000013523	protein_coding	ENSMUSG00000013523	Bcas1	ensembl_havana	13	0.283763	0.129515	0.758212	7.52361	1.35011	19.9533	0.646785	4.53517	0.980768	1.98246	0.389012	2.15129	0.0679767	0.185508	8.95124	16.1969	0.685431	1.45241	1.21981	43.8757
16	18300825	18348104	-	ENSMUSG00000013539	protein_coding	ENSMUSG00000013539	Tango2	ensembl_havana	14	10.6729	11.8416	12.0035	14.1562	31.5227	19.0536	33.443	15.5854	24.327	13.2395	16.7831	10.2596	12.7949	10.7167	16.9843	14.4628	26.1984	25.7126	19.4825	16.0453
17	31557126	31559114	+	ENSMUSG00000013562	lncRNA	ENSMUSG00000013562	4833413E03Rik	ensembl_havana	12	0.0355578	0.0001	0.0001	0.0001	0.0001	0.0001	0.0001	0.0001	0.0001	0.0001	0.0001	0.0001	0.0001	0.0001	0.0001	0.0001	0.0001	0.0001	0.0001	0.0001
9	71215789	71296244	+	ENSMUSG00000013584	protein_coding	ENSMUSG00000013584	Aldh1a2	ensembl_havana	5	0.602883	0.77659	8.43409	3.56387	327.68	121.358	142.764	37.4624	119.325	44.8157	10.77	8.70413	0.543113	1.78002	40.7885	2.32446	396.557	324.129	11.0434	0.684199
1	171234853	171251389	-	ENSMUSG00000013593	protein_coding	ENSMUSG00000013593	Ndufs2	ensembl_havana	12	224.874	293.416	226.454	264.709	236.622	317.162	208.294	295.674	253.455	311.337	270.473	292.727	364.6	348.345	245.32	272.615	249.429	261.911	248.096	336.11
15	36504062	36555574	-	ENSMUSG00000013611	protein_coding	ENSMUSG00000013611	Snx31	ensembl_havana	14	0.0355578	0.0001	0.347568	0.132091	6.98638	3.88791	0.923936	0.287534	1.80326	1.30988	1.55575	0.860574	0.0001	0.0001	0.754226	0.110784	7.56989	6.83255	1.18684	0.715294
5	31048312	31054624	+	ENSMUSG00000013622	protein_coding	ENSMUSG00000013622	Atraid	ensembl_havana	15	20.2111	18.7653	23.2804	22.4716	21.7352	22.7486	21.2791	23.7933	31.4764	34.2667	20.7919	22.4717	21.4152	19.913	26.4273	22.1369	21.8372	22.5769	22.3504	22.8552
5	31054780	31078480	+	ENSMUSG00000013629	protein_coding	ENSMUSG00000013629	Cad	ensembl_havana	16	529.528	497.18	365.22	327.603	330.212	234.008	264.125	246.299	329.821	308.329	395.464	392.509	369.996	408.492	375.587	324.525	383.598	237.717	268.369	267.234
11	58379043	58390729	+	ENSMUSG00000013643	protein_coding	ENSMUSG00000013643	Lypd8	ensembl_havana	13	0.0001	0.0001	0.0001	0.0330979	0.0338501	0.0001	0.0001	0.0001	0.189907	0.0001	0.0300163	0.0331952	0.0001	0.0001	0.0328881	0.0001	0.0001	0.0001	0.0001	0.0001
11	58330724	58347729	+	ENSMUSG00000013646	protein_coding	ENSMUSG00000013646	Sh3bp5l	ensembl_havana	17	43.365	47.4631	51.6781	46.8241	50.1528	59.1848	50.072	53.2393	56.9105	63.5773	58.6959	59.5052	44.4254	42.7182	61.3466	65.8939	46.1665	52.3492	54.0299	66.2022
11	58421111	58426025	+	ENSMUSG00000013653	protein_coding	ENSMUSG00000013653	1810065E05Rik	ensembl_havana	2	0.0001	0.0001	0.031688	0.0330979	0.10135	0.353538	0.554402	0.191723	0.474617	0.141697	0.448844	0.165576	0.0001	0.0001	0.131252	0.516625	0.560825	0.165135	0.0001	0.186672
19	32671638	32739787	-	ENSMUSG00000013662	protein_coding	ENSMUSG00000013662	Atad1	ensembl_havana	6	157.007	124.724	158.193	124.171	165.41	130.419	131.801	118.423	147.258	157.421	157.061	148.895	143.118	145.546	137.415	135.035	190.148	174.409	157.244	129.077
19	32757497	32826161	+	ENSMUSG00000013663	protein_coding	ENSMUSG00000013663	Pten	ensembl_havana	7	84.7444	79.1051	108.442	90.0182	104.322	96.3921	95.5555	97.6	107.494	124.287	105.305	116.396	83.3187	92.2964	91.8395	78.9547	95.261	115.063	107.499	89.3372
7	131137713	131146315	-	ENSMUSG00000013668	protein_coding	ENSMUSG00000013668	4933402N03Rik	ensembl_havana	9	0.0001	0.0001	0.0001	0.0001	0.0001	0.0001	0.0001	0.0320371	0.0001	0.0001	0.0001	0.0001	0.0001	0.0371817	0.0001	0.0738893	0.0001	0.0001	0.0001	0.0622908
1	172196728	172206805	-	ENSMUSG00000013698	protein_coding	ENSMUSG00000013698	Pea15a	ensembl_havana	12	111.941	112.753	213.819	131.761	210.23	97.9023	168.569	99.8676	238.461	137.597	159.963	116.925	52.2991	66.0426	168.629	106.884	192.204	96.4136	227.525	118.225
14	32180162	32201899	-	ENSMUSG00000013701	protein_coding	ENSMUSG00000013701	Timm23	ensembl_havana	13	36.0962	27.2743	32.9464	26.5304	22.984	24.0981	28.7622	23.2823	24.4219	20.6025	27.4034	28.0979	17.6141	23.9919	27.4437	25.0147	22.3356	20.5965	29.6028	23.2906
3	95139521	95142361	-	ENSMUSG00000013707	protein_coding	ENSMUSG00000013707	Tnfaip8l2	ensembl_havana	3	0.0001	0.0001	0.063276	0.0001	0.0001	0.160753	0.0616891	0.0001	0.0001	0.106298	0.0300163	0.0331952	0.0001	0.0371817	0.0656761	0.0738893	0.0001	0.066114	0.0001	0.0001
6	106769120	106782475	+	ENSMUSG00000013736	protein_coding	ENSMUSG00000013736	Trnt1	ensembl_havana	16	111.763	99.4232	83.5187	83.5507	84.7467	71.6515	76.3089	69.6231	95.1882	92.7464	104.946	97.9949	109.18	107.537	86.1999	77.1099	103.89	83.1447	82.9403	79.822
17	35076902	35078805	+	ENSMUSG00000013766	protein_coding	ENSMUSG00000013766	Ly6g6e	ensembl_havana	11	0.0001	0.0648075	0.0001	0.0001	0.0001	0.0001	0.0001	0.0001	0.0001	0.0354994	0.0001	0.0001	0.0001	0.0001	0.0001	0.0369947	0.0001	0.0001	0.0001	0.0311954
17	34898469	34914053	+	ENSMUSG00000013787	protein_coding	ENSMUSG00000013787	Ehmt2	ensembl_havana	15	219.094	252.812	204.153	267.217	239.626	250.395	234.408	220.973	260.415	270.876	258.597	234.082	312.063	298.322	213.123	240.406	232.171	247.586	213.746	214.9
9	22112989	22117173	-	ENSMUSG00000013822	protein_coding	ENSMUSG00000013822	Elof1	ensembl_havana	7	76.5891	69.3342	62.4811	63.026	64.8341	61.9159	57.4011	63.4911	57.3217	62.303	74.3122	78.4025	60.071	74.1264	59.1826	66.9639	71.1499	78.3257	59.0736	66.1089
10	79894708	79908924	-	ENSMUSG00000013833	protein_coding	ENSMUSG00000013833	Med16	ensembl_havana	15	28.0827	25.7861	39.6114	61.6071	30.5777	43.3444	35.1367	47.9378	39.0687	45.8777	42.0026	41.5345	35.9408	37.5268	38.5917	43.9416	28.2544	33.1061	33.6904	40.2064
15	67102875	67176831	-	ENSMUSG00000013846	protein_coding	ENSMUSG00000013846	St3gal1	ensembl_havana	10	13.5805	2.97665	27.608	14.7831	75.8029	31.7131	114.679	25.3263	109.74	37.6296	52.0545	13.3705	109.451	18.6522	17.8696	1.62346	72.4582	119.287	48.4259	4.50893
10	79974948	79984331	-	ENSMUSG00000013858	protein_coding	ENSMUSG00000013858	Tmem259	ensembl_havana	14	132.258	132.942	119.308	144.696	97.6055	138.355	128.506	150.552	130.556	156.43	132.619	138.636	166.468	170.465	108.594	137.064	84.5761	98.1959	121.872	146.522
8	26119368	26151791	+	ENSMUSG00000013878	protein_coding	ENSMUSG00000013878	Rnf170	ensembl_havana	18	3.82955	5.20906	5.65435	5.64273	6.31138	6.52263	5.94344	5.3336	7.94035	5.98259	5.5047	4.60033	6.14294	6.52647	7.08232	7.45282	6.38613	6.6015	5.63713	4.91317
7	30291728	30308368	+	ENSMUSG00000013921	protein_coding	ENSMUSG00000013921	Clip3	ensembl_havana	15	92.4033	134.559	59.0381	78.403	82.3842	102.272	103.901	142.631	116.162	129.597	80.4749	87.0073	114.983	121.999	42.7557	76.6303	59.9977	123.611	92.4343	111.011
7	30280094	30290238	+	ENSMUSG00000013928	protein_coding	ENSMUSG00000013928	Thap8	ensembl_havana	13	0.106474	0.0648075	0.094864	0.198087	0.0001	0.096492	0.0001	0.0001	0.221541	0.177097	0.0898489	0.0331952	0.0340383	0.0742633	0.0656761	0.295257	0.0624028	0.033107	0.0660302	0.186672
5	122100951	122113473	+	ENSMUSG00000013936	protein_coding	ENSMUSG00000013936	Myl2	ensembl_havana	12	0.0001	0.0001	0.0001	0.0001	0.0001	0.0001	0.0001	0.0001	0.0001	0.0001	0.0001	0.0001	0.0001	0.0001	0.0328881	0.0001	0.0001	0.0001	0.0001	0.0001
1	171329145	171342332	+	ENSMUSG00000013973	protein_coding	ENSMUSG00000013973	Dedd	ensembl_havana	12	37.7982	39.6335	36.8633	43.8542	38.374	40.1635	38.5856	38.165	43.0862	40.1784	44.336	39.4826	58.0347	45.0543	40.4278	37.1899	39.6247	41.5229	40.9428	39.9266
8	3665754	3669260	+	ENSMUSG00000013974	protein_coding	ENSMUSG00000013974	Mcemp1	ensembl_havana	3	0.0001	0.0001	0.0001	0.0001	0.0338501	0.0001	0.0001	0.0001	0.0317345	0.0001	0.0001	0.0993855	0.0001	0.0001	0.0001	0.0001	0.0001	0.033107	0.0001	0.0001
1	171338008	171345647	-	ENSMUSG00000013997	protein_coding	ENSMUSG00000013997	Nit1	ensembl_havana	10	14.6796	18.7976	18.7002	23.0326	32.974	33.3196	16.8755	21.0467	27.965	36.2136	26.6555	21.1479	42.8303	27.1068	22.2632	22.2107	30.5596	43.4043	15.7245	17.88
4	44524757	44710488	-	ENSMUSG00000014030	protein_coding	ENSMUSG00000014030	Pax5	ensembl_havana	15	0.0001	0.0324538	0.063276	0.0001	0.0001	0.0001	0.0001	0.0639743	0.0001	0.106298	0.0001	0.0331952	0.0001	0.0001	0.0001	0.0369947	0.0312514	0.0001	0.0001	0.0933862
16	97791467	97851851	-	ENSMUSG00000014039	protein_coding	ENSMUSG00000014039	Prdm15	ensembl_havana	18	24.2178	26.1096	19.0477	22.9996	22.9165	29.1105	23.7119	22.8671	19.4553	18.5494	23.9331	23.1998	24.7072	24.2886	21.5746	26.2322	16.7284	25.5145	21.0648	24.9075
16	32277459	32301435	+	ENSMUSG00000014074	protein_coding	ENSMUSG00000014074	Rnf168	ensembl_havana	17	46.379	40.1511	47.0346	46.5601	48.4316	43.6978	41.2032	45.1592	43.6873	47.7184	46.3704	45.7045	36.7893	38.7875	47.969	47.8156	44.64	49.5766	46.5139	45.5549
16	32419702	32429100	+	ENSMUSG00000014075	protein_coding	ENSMUSG00000014075	Tctex1d2	ensembl_havana	15	7.9072	8.76797	7.29693	6.43468	7.83013	7.26163	7.05205	7.53727	10.1548	11.3633	9.99214	9.39913	9.06164	9.64133	9.67258	9.33445	7.04031	10.1993	8.17545	8.20928
2	119547697	119587028	+	ENSMUSG00000014077	protein_coding	ENSMUSG00000014077	Chp1	ensembl_havana	13	135.591	99.9409	198.152	227.058	219.039	217.943	326.391	174.856	240.896	196.785	152.783	130.395	93.7378	82.0618	213.844	141.159	250.426	263.495	213.68	145.091
6	41852989	41864414	+	ENSMUSG00000014104	protein_coding	ENSMUSG00000014104	Sval2	ensembl_havana	12	0.0001	0.0001	0.0001	0.0001	0.0001	0.0001	0.0001	0.0001	0.0001	0.0001	0.0001	0.0001	0.0001	0.0001	0.0001	0.0001	0.0001	0.0001	0.0001	0.0001
5	114622152	114658422	-	ENSMUSG00000014158	protein_coding	ENSMUSG00000014158	Trpv4	ensembl_havana	12	0.922004	1.16484	0.31598	0.198087	0.270101	0.321407	0.123278	0.415283	0.56952	0.849685	0.23943	0.165576	2.34185	1.37212	0.557497	0.110784	0.405068	0.759261	0.362716	0.373245
13	58000228	58113593	-	ENSMUSG00000014164	protein_coding	ENSMUSG00000014164	Klhl3	ensembl_havana	15	0.141931	0.129515	0.821388	0.330079	0.168851	0.192884	0.277251	0.0959114	0.632789	0.778886	0.209514	0.0001	0.237668	0.0371817	0.0656761	0.0369947	0.0624028	0.33017	0.164926	0.0933862
11	62879455	62916781	+	ENSMUSG00000014177	protein_coding	ENSMUSG00000014177	Tvp23b	ensembl_havana	10	37.3727	36.8834	33.5781	38.9376	40.804	37.3681	46.2843	40.8796	42.6433	39.789	40.1478	35.8422	48.1586	38.6392	36.1653	34.8287	45.3254	51.1279	43.7118	40.6107
11	100582818	100620169	-	ENSMUSG00000014195	protein_coding	ENSMUSG00000014195	Dnajc7	ensembl_havana	15	249.375	215.67	227.813	186.504	166.76	170.967	202.72	195.392	199.329	216.149	228.471	233.288	198.064	219.598	192.827	212.107	205.319	171.868	227.624	217.512
11	100627543	100692456	-	ENSMUSG00000014198	protein_coding	ENSMUSG00000014198	Zfp385c	ensembl_havana	15	0.0001	0.0971613	0.0001	0.0001	1.31636	0.225015	0.523607	0.255597	0.442982	0.141697	0.0599326	0.0331952	0.0001	0.0371817	0.0001	0.0001	0.778885	0.957303	0.13196	0.155577
1	160202367	160212876	-	ENSMUSG00000014226	protein_coding	ENSMUSG00000014226	Cacybp	ensembl_havana	10	273.274	260.254	233.941	189.078	179.922	157.505	201.55	165.946	203.821	194.024	220.543	217.832	168.674	191.379	203.221	181.264	247.155	185.334	213.185	188.998
16	3908801	3941148	+	ENSMUSG00000014232	protein_coding	ENSMUSG00000014232	Cluap1	ensembl_havana	14	10.141	12.8122	9.69761	8.28256	9.58514	8.0649	10.9322	9.29381	9.96495	8.81454	9.15449	8.70413	12.8627	10.6055	10.4595	10.7733	8.25522	12.1797	9.52702	8.64462
11	62267224	62281376	-	ENSMUSG00000014243	protein_coding	ENSMUSG00000014243	Zswim7	ensembl_havana	5	7.80083	8.21796	6.85469	5.93971	4.48887	5.78362	4.95802	5.90847	9.61698	9.06234	8.73566	7.57889	10.3852	7.63892	5.83638	7.15766	4.5482	5.77633	6.95574	6.71671
11	62458460	62514418	+	ENSMUSG00000014245	protein_coding	ENSMUSG00000014245	Pigl	ensembl_havana	8	7.87174	11.5504	8.9395	10.6914	8.67389	11.1173	8.86892	12.775	10.0915	14.266	12.9838	13.1389	16.7317	13.6462	10.8202	10.1461	7.91255	9.47311	9.65888	11.3499
18	36742332	36744558	-	ENSMUSG00000014294	protein_coding	ENSMUSG00000014294	Ndufa2	ensembl_havana	4	93.7507	102.723	71.768	80.0529	70.7404	79.3308	86.0708	89.7435	74.6891	73.4538	81.522	70.7906	90.887	92.7784	92.5936	96.9961	65.9164	70.8661	98.5988	94.3435
16	4616464	4624989	-	ENSMUSG00000014301	protein_coding	ENSMUSG00000014301	Pam16	ensembl_havana	13	11.8785	11.1298	8.52886	9.04151	8.06639	8.51473	9.51561	7.85664	6.92805	7.89416	7.47917	9.26674	10.3174	11.1246	9.41028	9.37134	8.56673	8.64794	8.20841	9.67077
16	4594713	4624925	+	ENSMUSG00000014303	protein_coding	ENSMUSG00000014303	Glis2	ensembl_havana	13	60.5976	59.1428	66.1769	75.9612	119.881	109.983	97.3108	68.5053	91.1073	93.3836	65.427	54.2762	58.5098	38.8246	77.216	68.9562	95.9775	132.556	70.2488	53.1421
15	35925886	35938247	-	ENSMUSG00000014313	protein_coding	ENSMUSG00000014313	Cox6c	ensembl_havana	15	57.5482	74.9314	52.0887	57.4824	60.8179	76.6639	53.7981	67.7707	65.1354	88.4277	56.5419	60.4319	52.2651	64.6335	60.9859	69.2145	70.153	75.8172	73.9408	79.2623
10	70922832	71159701	-	ENSMUSG00000014329	protein_coding	ENSMUSG00000014329	Bicc1	ensembl_havana	14	58.541	125.824	67.3457	164.461	212.829	252.547	304.743	239.625	217.993	241.282	119.605	128.707	380.449	157.56	13.8039	53.7925	141.427	307.625	139.113	110.109
11	96047432	96065389	-	ENSMUSG00000014349	protein_coding	ENSMUSG00000014349	Ube2z	ensembl_havana	7	178.459	169.21	204.532	224.781	216.98	204.48	185.845	183.128	199.993	213.848	206.542	212.239	158.153	166.645	188.236	192.479	219.742	217.186	202.505	215.927
11	96024545	96030832	+	ENSMUSG00000014351	protein_coding	ENSMUSG00000014351	Gip	ensembl_havana	12	0.0001	0.0001	0.0001	0.0330979	0.0001	0.0001	0.0001	0.0001	0.0317345	0.0001	0.0001	0.0001	0.0001	0.0742633	0.0001	0.0369947	0.0001	0.0001	0.0001	0.0311954
2	128818118	128854262	+	ENSMUSG00000014353	protein_coding	ENSMUSG00000014353	Tmem87b	ensembl_havana	14	35.848	45.0365	45.8343	61.6071	43.2678	52.6944	50.5955	56.8482	48.6539	59.3294	42.6907	52.0257	30.884	31.3341	48.592	57.3344	42.6775	44.7576	48.4588	69.405
2	128610104	128687392	-	ENSMUSG00000014355	protein_coding	ENSMUSG00000014355	Anapc1	ensembl_havana	10	429.997	465.959	526.919	513.15	462.343	468.755	478.362	440.797	463.223	432.049	377.424	419.448	327.709	344.748	577.824	494.425	477.27	511.246	399.966	462.544
2	128698956	128802895	+	ENSMUSG00000014361	protein_coding	ENSMUSG00000014361	Mertk	ensembl_havana	5	4.39687	9.22092	8.74997	9.96545	11.2051	36.5327	15.3358	29.9571	12.2743	26.4434	8.97499	25.351	5.93931	8.15807	11.1153	17.0454	11.3392	43.3053	10.6149	62.7817
7	46888949	46919970	-	ENSMUSG00000014402	protein_coding	ENSMUSG00000014402	Tsg101	ensembl_havana	15	57.1936	51.5073	56.4163	60.2212	49.8153	54.7187	52.4124	52.4409	56.4676	46.5857	50.4091	45.9362	40.6922	41.5687	51.838	57.9616	44.2039	38.9814	54.2277	57.1534
7	46760466	46796065	-	ENSMUSG00000014418	protein_coding	ENSMUSG00000014418	Hps5	ensembl_havana	16	41.3085	50.9249	38.1268	46.7581	34.5265	64.647	42.0346	69.687	39.1636	44.0015	41.8829	49.4112	46.3599	49.6154	44.1001	66.5212	33.8305	33.1061	43.2503	88.7153
17	12227621	12318797	-	ENSMUSG00000014426	protein_coding	ENSMUSG00000014426	Map3k4	ensembl_havana	9	47.6554	67.0371	41.0645	56.4264	41.2765	52.3731	44.3442	56.5608	55.8033	69.0996	45.1438	48.7162	65.3653	68.6012	44.8542	47.1146	37.2572	42.9422	38.3056	47.3584
8	122481698	122551330	-	ENSMUSG00000014444	protein_coding	ENSMUSG00000014444	Piezo1	ensembl_havana	17	392.341	291.216	423.216	323.445	649.623	375.447	609.054	280.312	532.345	307.337	398.964	274.094	372.609	281.524	680.648	405.251	741.029	545.606	554.44	334.742
14	63372836	63417038	-	ENSMUSG00000014453	protein_coding	ENSMUSG00000014453	Blk	ensembl_havana	4	0.0001	0.0001	0.0001	0.0660957	0.0001	0.0001	0.0001	0.0001	0.0001	0.0001	0.0001	0.0001	0.0001	0.0001	0.0001	0.0001	0.0001	0.0001	0.0001	0.0001
8	122466147	122476065	-	ENSMUSG00000014470	protein_coding	ENSMUSG00000014470	Rnf166	ensembl_havana	4	31.3094	29.8626	17.7526	20.3268	28.5865	27.7289	30.1479	25.2943	30.1794	28.0718	26.7154	23.63	25.0127	24.8077	22.3288	19.6649	29.7497	32.314	32.6026	28.7944
14	31698768	31830652	-	ENSMUSG00000014496	protein_coding	ENSMUSG00000014496	Ankrd28	ensembl_havana	8	202.748	207.55	160.909	163.01	115.358	130.033	157.822	142.504	124.893	110.34	134.055	156.838	137.484	187.225	143.612	149.423	109.778	117.769	160.276	163.78
10	128377115	128408705	+	ENSMUSG00000014498	protein_coding	ENSMUSG00000014498	Ankrd52	ensembl_havana	9	249.978	242.427	201.879	214.651	182.082	204.544	267.728	255.114	221.726	198.307	221.77	227.231	227.387	234.653	256.108	252.728	175.6	159.853	232.404	276.563
18	34408489	34444117	+	ENSMUSG00000014503	protein_coding	ENSMUSG00000014503	Pkd2l2	ensembl_havana	15	0.0710157	0.194223	0.126452	0.0001	0.0338501	0.0001	0.0308945	0.0320371	0.0633689	0.106298	0.0898489	0.198671	0.237668	0.185508	0.0656761	0.110784	0.0624028	0.099121	0.164926	0.0001
18	34330847	34336600	+	ENSMUSG00000014504	protein_coding	ENSMUSG00000014504	Srp19	ensembl_havana	16	82.1559	82.2757	63.1129	64.8739	57.9154	57.6425	76.9864	66.7168	59.03	62.7278	68.7477	67.3818	61.4624	65.1897	66.3631	64.9716	61.8356	65.552	71.3366	63.4969
5	3651181	3680326	+	ENSMUSG00000014529	protein_coding	ENSMUSG00000014529	Tmbim7	ensembl_havana	9	0.0001	0.0001	0.0001	0.0001	0.0001	0.0001	0.0001	0.0320371	0.0001	0.0354994	0.0001	0.0001	0.0001	0.0001	0.0001	0.0001	0.0001	0.0001	0.0001	0.0001
6	83644542	83656188	-	ENSMUSG00000014542	protein_coding	ENSMUSG00000014542	Clec4f	ensembl_havana	3	0.0001	0.0001	0.0001	0.0001	0.0001	0.0001	0.0001	0.0001	0.0001	0.0001	0.0001	0.0001	0.0001	0.0001	0.0001	0.0001	0.0001	0.0001	0.0001	0.0001
6	129831154	129876673	-	ENSMUSG00000014543	protein_coding	ENSMUSG00000014543	Klra17	ensembl_havana	14	0.0001	0.0324538	0.0001	0.0001	0.0001	0.0001	0.0001	0.0001	0.0633689	0.0001	0.0300163	0.0001	0.0001	0.0001	0.0984642	0.0001	0.0001	0.0001	0.0989953	0.248863
14	62837678	62961510	+	ENSMUSG00000014547	protein_coding	ENSMUSG00000014547	Wdfy2	ensembl_havana	10	24.8561	38.1128	30.9247	43.6563	28.3165	48.7745	34.2744	57.3273	19.5502	26.6558	26.117	38.2581	23.9266	41.3091	26.5584	34.7918	19.8435	31.8189	34.4157	48.198
6	92186712	92214926	-	ENSMUSG00000014550	protein_coding	ENSMUSG00000014550	Rbsn	ensembl_havana	14	77.6173	71.3402	57.2375	48.9689	63.2479	63.8438	58.3557	59.9142	56.9105	62.9756	61.4183	61.8219	82.4363	78.6132	50.8872	47.0777	67.7855	67.0703	56.2056	59.0503
6	92169525	92184034	-	ENSMUSG00000014551	protein_coding	ENSMUSG00000014551	Mrps25	ensembl_havana	8	55.988	62.4105	48.4245	47.352	50.0516	54.0439	38.6164	45.7341	39.5115	43.6475	56.8411	62.8478	64.0417	66.1538	50.3298	51.9109	58.004	49.3456	45.7227	47.4828
6	83480217	83506970	-	ENSMUSG00000014554	protein_coding	ENSMUSG00000014554	Dguok	ensembl_havana	13	14.9279	13.6857	12.5089	14.3212	17.3139	18.9893	12.749	16.0645	14.0142	16.2838	19.8645	14.1317	29.1871	20.9883	15.8039	15.1269	14.6724	20.1014	13.1532	13.9308
4	150917322	151861877	-	ENSMUSG00000014592	protein_coding	ENSMUSG00000014592	Camta1	ensembl_havana	20	13.4741	11.3563	7.32851	9.00851	25.4477	10.6675	11.9484	9.48543	6.92805	7.22157	6.94068	6.55294	13.0324	10.7167	8.19712	11.0316	22.1487	11.7836	11.0764	11.5365
3	107741048	107760470	-	ENSMUSG00000014599	protein_coding	ENSMUSG00000014599	Csf1	ensembl_havana	10	244.588	165.231	718.911	187.296	245.229	178.679	475.776	300.177	334.819	347.834	317.831	245.798	159.85	104.867	170.629	194.619	266.625	385.423	553.55	211.573
3	107612532	107631695	-	ENSMUSG00000014601	protein_coding	ENSMUSG00000014601	Strip1	ensembl_havana	13	75.8799	80.5933	67.472	75.2022	52.6166	61.0805	54.876	75.244	58.1442	65.2411	65.7561	67.779	60.7837	64.7818	55.1496	65.7095	56.5087	66.2122	65.1721	71.1153
1	93015464	93101952	-	ENSMUSG00000014602	protein_coding	ENSMUSG00000014602	Kif1a	ensembl_havana	15	0.0355578	0.51776	1.86379	7.6886	5.67012	1.47811	1.44744	4.56711	16.1969	14.0182	1.2865	2.08509	0.0679767	0.0001	0.655861	0.221468	7.16492	4.258	1.58243	5.65946
3	107595031	107605777	+	ENSMUSG00000014603	protein_coding	ENSMUSG00000014603	Alx3	ensembl_havana	3	0.0355578	0.0001	0.252804	0.0001	0.0001	0.0643614	0.0001	0.0639743	0.0001	0.0001	0.0001	0.0001	0.0001	0.0001	0.0001	0.0001	0.0001	0.0001	0.0989953	0.0001
11	70644196	70647480	-	ENSMUSG00000014606	protein_coding	ENSMUSG00000014606	Slc25a11	ensembl_havana	14	58.0091	66.4547	74.3898	77.776	78.3004	84.4717	69.4418	78.3739	79.5924	80.038	86.1889	75.9866	119.429	90.4794	76.1668	78.844	73.8912	86.1154	66.0952	63.7457
11	70614883	70619217	-	ENSMUSG00000014609	protein_coding	ENSMUSG00000014609	Chrne	ensembl_havana	16	0.0001	0.0001	0.0001	0.0990936	0.0338501	0.0322307	0.0001	0.0320371	0.0001	0.106298	0.0300163	0.0331952	0.0001	0.0001	0.0001	0.0369947	0.0312514	0.033107	0.0330651	0.0311954
8	116888685	116921456	-	ENSMUSG00000014633	protein_coding	ENSMUSG00000014633	Cmc2	ensembl_havana	15	18.3673	22.7124	15.6993	16.0371	18.3602	20.0175	18.8771	20.376	16.0071	20.4609	16.9926	17.2096	17.3087	21.6929	28.9848	22.1	21.5569	21.2236	16.2189	15.7344
5	110135842	110171973	+	ENSMUSG00000014668	protein_coding	ENSMUSG00000014668	Chfr	ensembl_havana	15	34.4651	42.8041	59.2276	84.2106	56.9366	66.0929	58.3249	71.6351	49.508	56.0019	46.0712	48.9809	35.1602	35.821	57.7071	68.2183	59.4369	59.7758	57.8209	72.017
7	19852097	19861300	-	ENSMUSG00000014686	protein_coding	ENSMUSG00000014686	Ceacam16	ensembl_havana	8	0.0710157	0.226576	0.031688	0.0001	0.0001	0.0001	0.0001	0.0001	0.0001	0.0001	0.0001	0.0001	0.0001	0.0742633	0.0001	0.0369947	0.0001	0.0001	0.0989953	0.0622908
6	52162417	52164832	-	ENSMUSG00000014704	protein_coding	ENSMUSG00000014704	Hoxa2	ensembl_havana	10	0.461052	0.194223	0.031688	0.264083	0.0338501	0.0001	0.0308945	0.191723	0.949134	1.13288	0.119765	0.0993855	6.61808	1.14963	0.0984642	0.0001	0.0001	0.033107	0.0001	0.0622908
14	68606027	68655843	-	ENSMUSG00000014725	protein_coding	ENSMUSG00000014725	Adam28	ensembl_havana	16	0.0001	0.0001	0.126452	0.165089	0.202601	0.803367	0.0924836	0.127849	0.221541	0.318694	0.209514	0.0331952	0.20373	0.0001	0.131252	0.258363	0.0935542	0.198142	0.263821	0.590913
6	83762644	83768327	+	ENSMUSG00000014747	protein_coding	ENSMUSG00000014747	Ankrd53	ensembl_havana	6	0.0001	0.0001	0.0001	0.0001	0.0001	0.0001	0.0001	0.0001	0.0001	0.0001	0.0001	0.0001	0.0001	0.0001	0.0001	0.0001	0.0001	0.0001	0.0001	0.0001
6	83768885	83775814	-	ENSMUSG00000014748	protein_coding	ENSMUSG00000014748	Tex261	ensembl_havana	13	121.23	127.603	102.882	107.21	113.367	137.873	101.868	106.862	102.116	109.207	120.892	135.061	111.657	122.258	112.693	109.54	124.356	120.674	120.389	126.9
17	15396202	15433584	+	ENSMUSG00000014763	protein_coding	ENSMUSG00000014763	Fam120b	ensembl_havana	8	40.493	47.0425	37.3055	44.2502	50.5578	56.7108	50.5031	52.409	55.9615	67.2589	47.1482	45.5059	74.2233	66.4875	42.4279	47.3728	46.8829	62.9445	40.5802	46.6432
17	15499888	15528380	+	ENSMUSG00000014767	protein_coding	ENSMUSG00000014767	Tbp	ensembl_havana	17	56.8036	49.1131	50.2882	42.7323	46.3391	35.9222	44.8985	41.6461	49.2866	60.2852	52.6229	47.3593	45.9526	46.3522	43.0836	37.8171	56.3841	52.5473	47.9314	39.9266
17	15475021	15499752	-	ENSMUSG00000014769	protein_coding	ENSMUSG00000014769	Psmb1	ensembl_havana	10	280.365	277.628	243.101	267.745	254.476	241.559	258.181	280.792	286.988	404.438	279.089	274.061	333.614	348.753	227.32	242.841	289.677	322.38	271.83	283.777
17	15519208	15527302	-	ENSMUSG00000014771	protein_coding	ENSMUSG00000014771	Pdcd2	ensembl_havana	13	38.1173	35.9451	34.3678	27.9823	30.9827	26.1866	35.4138	28.4561	42.327	50.6566	42.0923	40.4093	44.1539	44.3498	31.7062	30.7702	40.5904	34.2944	37.0859	33.3344
17	15367354	15376873	-	ENSMUSG00000014773	protein_coding	ENSMUSG00000014773	Dll1	ensembl_havana	13	0.248305	0.420699	0.31598	0.495068	0.168851	0.0322307	0.184867	0.127849	1.17057	0.672688	0.0300163	0.0662903	0.101915	0.111345	0.262405	0.221468	0.342765	0.0001	0.13196	0.0622908
8	105276140	105281940	+	ENSMUSG00000014776	protein_coding	ENSMUSG00000014776	Nol3	ensembl_havana	7	0.531968	1.13248	0.568684	2.14496	4.28637	1.89581	4.15736	3.38544	9.01592	10.3013	2.69257	1.55557	3.52969	1.4092	0.524709	0.627309	7.85025	11.1235	5.07673	3.01635
[truncated: 54,049 more rows]
